# Supplementary material for: Targeting RNA structure in SMN2 reverses spinal muscular atrophy molecular phenotypes
Source: PubMed Central journal article supplement (PMC5966403; doi:10.1038/s41467-018-04110-1), 2018-05-23
Supplement: 41467_2018_4110_MOESM1_ESM.pdf [file 41467_2018_4110_MOESM1_ESM.pdf]

1 **Supplementary Information**

2

3 **Targeting RNA structure in *SMN2* reverses Spinal Muscular Atrophy molecular phenotypes**

4

5 Amparo Garcia-Lopez, Francesca Tessaro, Hendrik R.A. Jonker , Anna Wacker , Christian Richter,

6 Arnaud Comte, Nikolaos Berntenis, Roland Schmucki, Klas Hatje, Olivier Petermann, Gianpaolo

7 Chiriano, Remo Perozzo, Daniel Sciarra, Piotr T. Konieczny, Ignacio Faustino, Guy Fournet,

8 Modesto Orozco, Ruben Artero, Friedrich Metzger, Martin Ebeling, Peter Goekjian, Benoît Joseph,

9 Harald Schwalbe & Leonardo Scapozza

10

## 11 **Supplementary Methods**

### 12 **Nuclear Magnetic Resonance (NMR) experiments**

13 *Sample preparation.* Unlabelled RNA oligomers were chemically synthesized by GE Dharmacon  
14 and delivered in lyophilized, deprotected form. Selectively  $^{13}\text{C}$ - $^{15}\text{N}$ -adenine-labelled oligos were  
15 synthesized by Dharmacon, with isotope-labelled adenosine-phosphoramidites from Cambridge  
16 Isotope Laboratories, Inc. (CNLM-3806-CA-0). The lyophilized RNA was dissolved in NMR-buffer  
17 (10 mM sodium phosphate buffer pH 6.4, 50 mM NaCl and 0.1 mM EDTA). NMR spectra were  
18 measured either in 10 %  $\text{D}_2\text{O}$ /90 %  $\text{H}_2\text{O}$  or 99.8 %  $\text{D}_2\text{O}$  in DEPC-treated 5 mm shigemi tubes. For  
19 ligand binding experiments, 40-50  $\mu\text{M}$  unlabeled 19mer was measured in NMR buffer containing  
20 10 % DMSO and 7 %  $\text{D}_2\text{O}$ . Pre-heating of the sample to 90 °C for 5 min and fast cooling on ice  
21 resulted in >90% monomeric conformation. The 19mer RNA tends to self-associate at  
22 concentrations around 1 mM and in the presence of  $\text{Mg}^{2+}$ . Therefore, NMR experiments were  
23 carried out using diluted samples of max 0.6 mM in the presence of EDTA and absence of  $\text{Mg}^{2+}$ .  
24 Native gel electrophoresis and reproducibility of 1D imino proton spectra<sup>1</sup> were used to confirm  
25 sample integrity.

26 *Chemical shift assignments.* All assigned resonances are deposited in the BMRB (ID: 34100).  $^1\text{H}$ - $^1\text{H}$   
27 NOESY spectra<sup>1</sup> and natural abundance  $^1\text{H}$ - $^{15}\text{N}$ -correlation spectra<sup>2</sup> in 90 %  $\text{H}_2\text{O}$  at temperatures  
28 from 5 °C – 25 °C were used for identification and sequential assignment of exchangeable imino  
29 and amino protons.  $^1\text{H}$ - $^1\text{H}$  NOESY<sup>3,4</sup> and TOCSY spectra<sup>5</sup>, and natural abundance  $^1\text{H}$ - $^{13}\text{C}$ -  
30 correlation spectra<sup>6</sup> in 99.8 %  $\text{D}_2\text{O}$  at temperatures from 5 °C - 25 °C were used for identification  
31 and sequential assignment of non-exchangeable protons. Sequential assignment exploits the NOE  
32 connectivities between anomeric H1'-protons and the aromatic proton of the 3'-residue as well as  
33 the NOE between adenine H2 protons and the anomeric proton in the 3'-direction of the own strand  
34 and of the opposite strand in A-helical RNA. Ambiguities during the assignment procedure could be  
35 overcome by the use of an RNA sample with  $^{13}\text{C}$ , $^{15}\text{N}$ -labelled adenines. By  $^{12}\text{C}$ -filtered ( $t_1+t_2$ )  
36 NOESY,  $^{12}\text{C}$ -filtered ( $t_1$ ) NOESY<sup>7-9</sup>,  $^{13}\text{C}$ -edited ( $t_1$ ) NOESY<sup>10</sup>, and 3D HCCH-TOCSY<sup>11</sup> experiments,  
37 all adenosine protons and 84 % of the total non-exchangeable protons were assigned. Furthermore,

38 employing 2D constant-time  $^{13}\text{C}$ - $^1\text{H}$ -correlation spectra<sup>12,13</sup>, all adenosine carbons and 72 % of the  
39 C, U and G ribose carbons were assigned.

40 Secondary structure prediction as well as several chemical probing experiments suggest that the  
41 19mer sequence forms an A-form double helix capped by a triloop consisting of residues 5'-  
42 A<sub>9</sub>A<sub>10</sub>U<sub>11</sub>-3', with some evidence that the loop-closing base-pair is unstable, resulting in temporary  
43 pentaloop conformation.  $^{15}\text{N}$ -HSQC spectra and  $^1\text{H}$ - $^1\text{H}$ -NOESY spectra of exchangeable protons at  
44 different temperatures confirmed that above 5 °C, only base pairs C4G16 to U7A13 are stable,  
45 whereas the imino protons of U3, U2 and G18 show strong cross signals to water, implying rapid  
46 exchange. 1D imino proton spectra show the U3 imino signal and broad resonances for G18 and U2  
47 only at 5 °C. The imino proton of the loop-closing base pair, U12, is not detectable at any  
48 temperature tested. However, in the "sequential walk" of anomeric-to-aromatic protons, no  
49 interruption occurs until residue A9, strongly hinting at A-helical stacking for all base-pairs from A1-  
50 U19 to A8-U12.

51 *Dihedral constraints.* The shape of the ribose sugar puckers were determined semi-quantitatively  
52 based on the canonical coordinates calculated from  $^{13}\text{C}$  chemical shifts for  $^{13}\text{C}$  labelled adenine  
53 residues<sup>14,15</sup> and on TOCSY cross peak intensities between H1' and H2' protons for all residues,  
54 which are not detectable at short mixing times for 3'-endo puckered ribose rings and have medium  
55 intensity for C2'-endo ribose. Glycosidic torsion angles were categorized according to the intra-  
56 residual NOE cross peak intensity between the anomeric and the aromatic proton, with none or very  
57 weak NOEs corresponding to the anti-conformation common for A-form RNA and medium to strong  
58 NOEs corresponding to syn-conformation. A summary of all experimental constraints (distances) is  
59 provided in Table 1.

60 *Restraints.* Due to the absence of  $^{15}\text{N}$ -labelled imino groups, hydrogen bonds could not be directly  
61 detected. However, given the exchange-protected imino protons of residues U6, U7, G15 and G16  
62 at all temperatures and of residues U3, U2 and G18 at low temperatures, typical values for Watson-  
63 Crick base pairing were assumed. Base pair planarity was restrained for the base pairs U3A17 to  
64 U7A13 and, more loosely, for U2G18 and A8U12. Backbone torsion angles ( $\alpha$ - $\zeta$ ) were loosely

65 restrained for the A-form RNA stem, (base pairs U3A17 to U7A13) with  $\delta$  corresponding to  $v_3$  in the  
66 ribose ring. A summary of all restraints is provided in Table 1.

67 *Structure calculations.* The NMR structure calculations were performed with CNS 1.1<sup>16</sup> using the  
68 ARIA 1.2<sup>17</sup> adapted setup and protocols with the nucleic acid forcefield including OPLS charges and  
69 nonbonded parameters<sup>18</sup>. The standard annealing protocols were used, including NOE distance  
70 calibration (separated for the water-exchangeable protons) and spin-diffusion correction. Dihedral  
71 angle restraints, Watson-Crick basepair hydrogen bonds and planarity restraints as described  
72 above and in Table 1 were included. The chemical shift resonances were manually assigned and  
73 the 2D <sup>1</sup>H,<sup>1</sup>H-NOESY spectra were manually peak picked and assigned to a large extent using  
74 Sparky<sup>19</sup>. The resonances and 9 NOESY peak lists (from two 2D <sup>12</sup>C-filtered NOESY spectra, 900  
75 MHz, 200 ms mixing time; a <sup>13</sup>C-editted NOESY spectrum, 900 MHz, 100 ms mixing time; 2D  
76 homonuclear NOESY spectra either in D<sub>2</sub>O, 900 MHz, 100, 200 and 300 ms mixing time; or H<sub>2</sub>O,  
77 900 MHz, 300 ms mixing time and 600 MHz, 50 ms mixing time; and a 3D NOESY-<sup>13</sup>C-HSQC  
78 spectrum, 800 MHz, 150 ms mixing time) were used as input for automated cross peak assignment  
79 and calibration with ARIA. The proton chemical shift tolerance was set to 0.015 ppm in both proton  
80 dimensions. 100 starting structures were generated based on a linear template molecule. For each  
81 iteration (0-7) in which 100 structures were calculated, the NOE distance restraints were  
82 recalibrated by ARIA based on the 20 lowest energy structures. The violation tolerance was  
83 progressively reduced to 0.1 Å in the last iteration (8) in which 400 structures were calculated. For  
84 the structure calculations, a four stage simulated annealing (SA) protocol was used using torsion  
85 angle dynamics (TAD). The high temperature stage consisted of 10000 steps at 10000 K. This was  
86 followed by refinement and cooling down stages: 8000 steps at 2000 K, 20000 steps to 1000 K and  
87 15000 steps to 50 K. During the SA protocol the force constant for the NOE restraints was set to 0,  
88 10, 10 and 50 kcal mol<sup>-1</sup> Å<sup>-2</sup> for the successive stages. The final 40 lowest energy structures were  
89 further refined in explicit water<sup>20</sup> and have been deposited to the PDB (5N5C) and BMRB (34100).  
90 All input scripts used are available upon request.

91 *Ligand titration experiments.* The ligand PK4C9 is poorly soluble in water, therefore the titration  
92 experiments were carried out in 10 % DMSO at low RNA concentrations (40-50 μM). Up to 20

93 equivalents of ligand were added from a 100 mM solution in 100% DMSO and changes upon ligand  
94 titration were monitored for the imino proton pattern by jump-return echo 1D spectra, for the  
95 pyrimidine H5/H6 proton pattern by TOCSY spectra with short mixing times<sup>21</sup>, and for the adenine  
96 aromatic and anomeric protons by <sup>13</sup>C-HSQC spectra<sup>12,22,23</sup>. Chemical shifts induced by PK4C9  
97 were only observed in TOCSY spectra showing the cross peak region of H5/H6 protons of the  
98 pyrimidine bases. <sup>1</sup>H chemical shifts were referenced to the internal DMSO signal at 2.63 ppm. The  
99 residues closest to the helix end, U2 and U19 showed the most significant shifts, clearly  
100 distinguishable from the DMSO-induced shifts.

### 101 **RNA sequencing**

102 Four total-RNA extractions of DMSO-treated GM03813C fibroblasts (control) and four extractions of  
103 PK4C9-treated (40 μM, 24 h) GM03813C fibroblasts were obtained using the RNeasy mini kit with  
104 on column DNase digestion (Qiagen). RNA concentration was quantified in a Qubit fluorometer and  
105 integrity assessed with Agilent's 2100 bioanalyzer using pico chips. Samples with RIN values ≥9.5  
106 were sent to Beckman Coulter Genomics for RNA sequencing. A poly-A capture protocol was  
107 applied to eliminate tRNAs and rRNAs prior to cDNA synthesis. Eight Illumina TruSEQ RNA-seq  
108 libraries were constructed and sequencing was performed on the Illumina HiSeq 2500 platform using  
109 paired-end 125 bp read lengths. A total of >400M read pairs were produced, of which >90% could  
110 be mapped to the human genome reference sequence GRCh38.

111 *RNA-seq raw data processing.* To estimate gene expression levels, paired-end RNA-seq reads  
112 were mapped onto the human genome (hg19) by using the short read aligner GSNAP<sup>24,25</sup> and  
113 RefSeq transcript annotations. Mapped reads for all transcript variants of a gene (counts) were  
114 combined into a single value, normalized and denoted as rpkm (number of mapped reads per  
115 kilobase transcript per million sequenced reads)<sup>26</sup>.

116 For the splicing analysis, paired-end RNA-seq reads were mapped onto RefSeq human transcripts  
117 using the alignment software GSNAP with default parameters and the option 'sam-multiple-  
118 primaries' in order to account for reads that map multiple times to different splice variants. The  
119 number of reads spanning splice-sites was determined by applying the samtools mpileup software<sup>27</sup>

120 with default parameters for each transcript. Reads were excluded from the analysis if they were not  
121 mapped as proper read pair or their start or end coordinates mapped exactly onto the splice-site.  
122 RNA-seq data have been deposited in Gene Expression Omnibus (GEO accession number  
123 GSE94111).

124 *Alternative splicing analysis.* The sequencing reads generated do not allow unambiguous  
125 identification of full-length transcript variants. Therefore, a database of local alternative splicing  
126 events was generated based on the human RefSeq database of transcripts (Release 66, August  
127 2014). Such local splicing events were classified into the following categories:

128 CASSETTE – inclusion or skipping of a single exon

129 INTERNAL3 – use of an alternative 3' acceptor splice site, leading to a length polymorphism

130 INTERNAL5 - use of an alternative 5' donor splice site, leading to a length polymorphism

131 LCASSETTE – joint inclusion or skipping of two exons

132 MUT\_EXCLU – mutually exclusive usage of one out of two exons

133 XCASSETTE - joint inclusion or skipping of three or more exons

134 For each local splicing event, a distinction was made between two alternatives, e.g. including or  
135 skipping the exon in the case of a CASSETTE event, and all the sequencing reads that were unique  
136 for either alternative were collected; for the CASSETTE case, these were reads covering the  
137 different splice junctions or mapping fully to the alternative exon. The obtained read counts for either  
138 alternative were normalized by the length of their corresponding unique sequence stretches (which  
139 is typically longer for the exon inclusion alternative) to obtain normalized counts  $c_1$  and  $c_2$  for the  
140 two alternatives, respectively. Splicing events were then characterized by a PSI (“percent spliced  
141 in”) score  $PSI = c_1/(c_1+c_2)$ , which ranges from 0 to 1. Changes were determined by  $\Delta PSI$  values  
142 (relative to matched controls).

143 Additionally, exon junctions with read support only in the treated but not in the control samples were  
144 analyzed. Sequencing reads were aligned with STAR (version STAR\_2.5.2a) and GSNAP (version  
145 2017-05-08) onto human genome hg19 by using default mapping parameters. SAM to BAM file  
146 conversion and PCR duplicate removal was performed with SAMTOOLS (version 1.5). By using the  
147 NH tag in the SAM file non-uniquely aligned reads were discarded. Replicates of control and treated

148 samples were pooled into two data sets “Control” and “Treated”. Then, junction coordinates were  
149 determined by applying an in-house developed pipeline, which incorporates SAMTOOLS and  
150 parses the CIGAR read alignment string. Read alignments containing insertions and/or deletions or  
151 large clippings were discarded. As a result, for each junction the numbers of supporting reads were  
152 determined for both the GSNAP and STAR alignment. Junctions were discarded if they were  
153 detected in both treated and control samples, as well as represented in the Intropolis database  
154 and/or in RefSeq/Ensembl annotations. We use only junctions that are supported by at least one  
155 read count in the treated samples and no read count in the control samples by both aligners  
156 GSNAP and STAR. The majority (80.7%) of those junctions are not in RefSeq/Ensembl annotations.  
157 (see Supplementary Table 3). However, more than half of the junctions are represented in the  
158 Intropolis database by both (55.4%) or one (39.3%) of the two junction coordinates. Only 38  
159 junctions (5.3%) detected in the treated but not in the control samples were not observed  
160 elsewhere.

161 *Gene Set Enrichment Analysis (GSEA)*. The edgeR<sup>28</sup> algorithm was used for differential gene  
162 expression analysis and identified genes with absolute log<sub>2</sub> fold change larger than 1 and  
163 Benjamini–Hochberg adjusted p value smaller than 0.05 as significantly changed. The camera<sup>29</sup>  
164 algorithm was applied for gene set enrichment analysis with gene sets collected in the Roche  
165 internal database RNET. The same method was applied for upstream regulator analysis, with  
166 transcriptional targets of human transcription factors and gene expression modulators curated from  
167 literature in RNET as input. Gene ontology enrichment analysis was performed using the Fisher’s  
168 exact test.

169 *Motifs analysis*. For the motif search 41 cassette exons were selected that show the strongest  
170 splicing effects measured in  $\Delta$ PSI. For the background distribution 1’051 cassette exons were  
171 selected that show weak or no splicing effects but are alternatively spliced. They were selected  
172 based on  $\Delta$ PSI values less than 0.1 and PSI values between 0.1 and 0.9. From these cassette  
173 exons we analyzed 40 nucleotide long sub-sequences surrounding the acceptor and donor sites:  
174 For the acceptor site we collected sub-sequences including 20 nucleotides upstream of the exon  
175 and the first 20 nucleotides of the exon and for the donor site the last 20 nucleotides of the exons

176 and the first 20 nucleotides downstream of the exon. The four motif-finding algorithms Gibbs<sup>30</sup>  
177 version 3.10.00, MEME<sup>31</sup> version 4.10.0, Weeder<sup>32</sup> version 2.0, and Homer<sup>33</sup> version 4.7.2 were  
178 applied using these sequence sets. WebLogo<sup>34</sup> version 2.8.2 was used to generate sequence  
179 logos. All input scripts used are available upon request.

## 180 **Molecular docking**

181 For the RNA preparation, the 40 conformations of the NMR bundle were clustered with the XCluster  
182 tool of Maestro 10.0 (Schrödinger suite of programs, [www.schrodinger.com](http://www.schrodinger.com)) based on RMSD. One  
183 representative structure per cluster was chosen and prepared using the Protein Preparation Wizard  
184 of Maestro 10.0. Bond orders were assigned and H-bonds optimized using a pH of 6.4, matching  
185 the NMR experimental conditions. An all-atom restrained minimization was carried out by the  
186 maximum RMSD of 0.3 Å in order to avoid steric clashes, and structures were saved as mae and  
187 pdb files. During ligand preparation, PK4C9 and its structural analogues were first drawn from  
188 scratch, and 3D conformations were obtained using the LigPrep tool of Maestro 10.0. The  
189 OPLS\_2005 force field was chosen and all the possible ionization states were created at a pH of  
190 6.4. The Glide 6.5 program (Schrödinger) was used for molecular docking. A receptor grid box (15  
191 Å) was built and centred between base pairs A1-U19 and U2-G18. The default settings were  
192 maintained and the standard precision mode of GlideScore was selected as the scoring function.  
193 After docking calculation, poses were energy minimized.

## 194 **Molecular dynamics**

195 A total of 12 MD trajectories of 40-ns or 100-ns with explicit solvent were produced using the  
196 AMBER12 suite of programs (University of California, San Francisco)<sup>35</sup>. The starting points of the  
197 RNA in pentaloop and triloop conformations were obtained from the NMR structures, whereas the  
198 RNA-PK4C9 complexes were extracted from the docking solutions. The Biopolymer toolkit of Sybyl  
199 x2.1.1 ([www.certara.com](http://www.certara.com)) was used to generate the mutant RNA structures. These mutated models  
200 underwent a first minimization step (steepest descent method) in order to remove potential  
201 steric clashes introduced by the replacement of the base. All the systems were parameterized using  
202 the AMBER ff12SB force field (which includes the refined parmbsc0 and parmχOL modifications for



203 RNA<sup>36,37</sup>) with the AMBER program Leap. The ligand charge was assigned from the general  
204 AMBER force field (GAFF) using the Antechamber and Parmchk programs<sup>38</sup>. The systems were  
205 solvated with water TIP3P into an octahedral box of 12Å. A net-neutralized sodium charge was then  
206 applied to each system with a supplementary 50 mM of NaCl in order to mimic the NMR  
207 experimental conditions. All the structures then underwent the same minimization, heating and  
208 equilibration protocols: I) a first 5000-step minimisation step, where restrains were applied to nucleic  
209 acids and ligand (steepest descendent and conjugated gradient methods were applied), followed by  
210 a second 5000-step minimization where the entire system was allowed to move. II) During the  
211 heating phase the temperature increases from 0 K to 298 K using the Langevin thermostat, and with  
212 100 kcal mol<sup>-1</sup> Å<sup>-2</sup> positional restrains for RNA, ligand and ions over the course of the first 80 ps at  
213 constant pressure (1 atm). The restrain forces were gradually turned off to zero in the following 100  
214 ps, allowing movement of all atoms. III) A final heating and equilibrating step was performed at 300  
215 K at constant pressure over 820 ps. Both for the heating and equilibration steps, a collision  
216 frequency of 1.0 ps<sup>-1</sup> was applied to control Langevin dynamics. Finally the MD production was  
217 carried out for 40 ns per system using the NPT ensemble (constant pressure, 1 atm; and  
218 temperature, 300 K). The simulation lengths, of the ligand-free triloop and pentaloop TSL2  
219 trajectories, as well as TSL2pentPK4C9, were extended to 100 ns to confirm the events sampled  
220 within 40 ns. Coordinates were recorded every picosecond. The SHAKE algorithm was used to  
221 restrain the lengths of all bonds involving hydrogen atoms, allowing an increase of the time step up  
222 to 2 fs with a cut-off space of 9 Å. The default particle-mesh Ewald settings (which correspond to a  
223 grid spacing of ~1 Å and a direct space tolerance of 10<sup>-6</sup>) were used to determine long-range charge  
224 interactions. All the MD production simulations were performed using the PMEMD program of  
225 AMBER12, whereas Sander (AMBER12) was used during minimization, heating and equilibration.  
226 CPPTRAJ of AmberTools<sup>39</sup> was used for processing and analysis of MD trajectories.  
227 Representative MD structures were obtained using the average-linkage clustering algorithm. All  
228 structure images were visualized and processed using the VMD software. All input scripts used are  
229 available upon request.

230 **Chemical library construction and compound synthesis**

231 A focused collection of 304 small molecules with favoured RNA-binding scaffolds (indole,  
232 benzimidazole, alkyl pyridinium and 2-phenyl benzimidazole) was built in-house using ligand-based  
233 modeling; taken from a larger, highly-diverse in-house library of >3000 compounds. In-house  
234 synthesis of PK4C9 (CAS Registry Number: 172286-77-0) and its derivatives BJGF466 (CAS  
235 Registry Number: 630110-69-9), 001 (CAS Registry Number: 474816-40-5), 002 (CAS Registry  
236 Number: 630110-77-9), 003 (CAS Registry Number: 847448-70-8), 004 (CAS Registry Number:  
237 630110-68-8), 005 (CAS Registry Number: 847448-72-0), and 007 (deoxytopsentin, CAS Registry  
238 Number: 112515-42-1) were carried out according to the literature<sup>40-45</sup>. <sup>1</sup>H, <sup>13</sup>C NMR and MS data of  
239 target compounds were comparable to those reported in the literature<sup>40-45</sup>. PK4C9 analogues 006  
240 and 008 (pyridine-2,6-diylbis((1*H*-indol-3-yl)methanone) were new compounds, described below.

241 Analogue 006: Melting-point: amorphous

242 <sup>1</sup>H-NMR (300 MHz, CDCl<sub>3</sub>): *d* = 1.22 (t, 3H, *J* = 7.0 Hz, CH<sub>3</sub>), 3.66 (q, 2H, *J* = 7.0 Hz, OCH<sub>2</sub>Me),  
243 5.99 (s, 2H, NCH<sub>2</sub>), 7.21-7.48 (m, 6H, H<sub>indole</sub>), 7.61 (s, 1H, H<sub>imidazole</sub>), 7.62 (d, 1H, *J* = 3.0 Hz, H<sub>indole</sub>),  
244 8.04-8.07 (m, 1H, H<sub>indole</sub>), 8.29 (br. s, 1H, NH), 8.55 (d, 1H, *J* = 7.7 Hz, H<sub>indole</sub>), 8.94 (br. s, 1H, NH),  
245 9.01 (d, 1H, *J* = 3.1 Hz, H<sub>indole</sub>) ppm.

246 <sup>13</sup>C-NMR (75 MHz, CDCl<sub>3</sub>): *d* = 15.0 (CH<sub>3</sub>), 65.2 (CH<sub>2</sub>), 77.2 (CH<sub>2</sub>), 109.6 (C), 112.0 (2 x CH), 116.0  
247 (C), 118.4 (CH), 119.7 (CH), 120.4 (CH), 122.1 (CH), 122.5 (CH), 122.9 (CH), 123.1 (CH), 123.7  
248 (CH), 124.9 (C), 126.6 (C), 136.1 (C), 136.4 (C), 136.5 (C), 137.4 (CH), 143.2 (C), 178.1 (CO) ppm.

249 HRMS (ESI): calcd. For C<sub>23</sub>H<sub>21</sub>N<sub>4</sub>O<sub>2</sub> [M + H]<sup>+</sup> 385.1659, found 385.1648.

250 Analogue 008: Melting-point: > 210 °C

251 <sup>1</sup>H-NMR (300 MHz, DMSO-*d*<sub>6</sub>): *d* = 7.25-7.32 (m, 4H, H<sub>indole</sub>), 7.49-7.55 (m, 2H, H<sub>indole</sub>), 8.24-8.27  
252 (m, 3H, H<sub>pyridine</sub>), 8.41-8.46 (m, 2H, H<sub>indole</sub>), 8.69 (d, 2H, *J* = 2.9 Hz, H<sub>indole</sub>), 12.07 (br. s, 2H, NH)  
253 ppm.

254 <sup>13</sup>C-NMR (100 MHz, DMSO-*d*<sub>6</sub>): *d* = 112.3 (2 x CH), 113.7 (2 x C), 121.8 (2 x CH), 122.3 (2 x CH),  
255 123.3 (2 x CH), 125.0 (2 x CH), 126.9 (2 x C), 136.2 (2 x C), 138.0 (2 x CH), 139.0 (CH), 154.9 (2 x  
256 C), 185.8 (2 x CO).

257 HRMS (ESI): calcd. For C<sub>23</sub>H<sub>15</sub>N<sub>3</sub>NaO<sub>2</sub> [M + Na]<sup>+</sup> 388.1056, found 388.1046.

258 Finally, NCI377363 was obtained from the National Cancer Institute repository (NCI Plated 2007).  
259 288D was previously described<sup>46</sup>.

### 260 **Circular dichroism**

261 Non-labelled TSL2 RNAs (10  $\mu$ M) were snap annealed in 25 mM Tris-HCl pH 7.5, 100 mM NaCl,  
262 5 mM MgCl<sub>2</sub> by heating to 90 °C for 5 min and placing on ice. RNA spectra between 320 and 200  
263 nm were obtained at 10 °C (unless otherwise stated) in 0.5 mm cuvettes with a J-815  
264 spectropolarimeter (Jasco). 10 measurements per collection point (data pitch 0.2 nm) were  
265 averaged.

### 266 **2-amino purine (2AP) assay**

267 2AP was introduced at position 15 of synthetic TSL2 RNA, substituting its analogue G. 2AP-labelled  
268 RNA (1  $\mu$ M) was snap annealed in 8 mM Na<sub>2</sub>HPO<sub>4</sub> pH 7, 185 mM NaCl, 0.1 mM EDTA, 40  $\mu$ g per  
269 mL BSA, and incubated with DMSO (control) or ligand (100  $\mu$ M) for 30 min in black 96-well plates  
270 (quadruplicates). Fluorescence emission was measured between 340 and 440 nm in a Synergy™  
271 Mx (BioTek) plate reader (excitation at 312 nm). Emissions of buffer or ligands alone were  
272 subtracted from the final RNA spectra. 2AP fluorescence changes were calculated by dividing  
273 emission at the peak (365 nm) of RNA with ligand by the emission at the peak of the RNA alone.

### 274 **Native PAGE**

275 Non-labelled TSL2 RNAs (10, 30 and 100  $\mu$ M) were snap annealed in 25 mM Tris-HCl pH 7.5,  
276 100 mM NaCl, 5 mM MgCl<sub>2</sub>, and loaded into prerun (15', 80V) 16 % polyacrylamide non-denaturing  
277 gels. Electrophoresis was carried out per triplicate at 4 °C in TBE 0.5X for ~90 min at 150 V,  
278 followed by 20 min staining with Sybr Safe (Invitrogen) and visualization under UV light.  
279 Quantification of band intensity was performed on ImageJ. Denaturing PAGE using Urea gels (8M)  
280 were run in parallel as a control.

### 281 **Cytotoxicity**

282 Cells were seeded per sextuplicate at a density of 1 x10<sup>4</sup> cells per well in 96-well plates (200  $\mu$ L per  
283 well) and cultivated for 24 h at 37 °C in 5% CO<sub>2</sub>. Each plate was repeated twice, giving a total of 12

284 replicates per point. Cells were then treated for 24 h or 72 h and the Cytotoxicity Detection kit (LDH)  
285 from Roche was used to measure cell death in a Synergy™ Mx (BioTek) plate reader at 492 nm and  
286 600 nm (reference) according to the manufacturer's instructions. DMSO-treated cells were used as  
287 the baseline (i.e., 0 % death reference) and chemically lysed cells were used as the 100 % death  
288 reference.

#### 289 **Differential Scanning Fluorimetry (DSF)**

290 DSF with RliboGreen (300 nM) was used to calculate the melting temperatures of n.m. TSL2 and  
291 mutant TSL2 RNAs (600 nM) in 96 well plates, as previously described<sup>47</sup> (n=6).

292 **Supplementary figures**

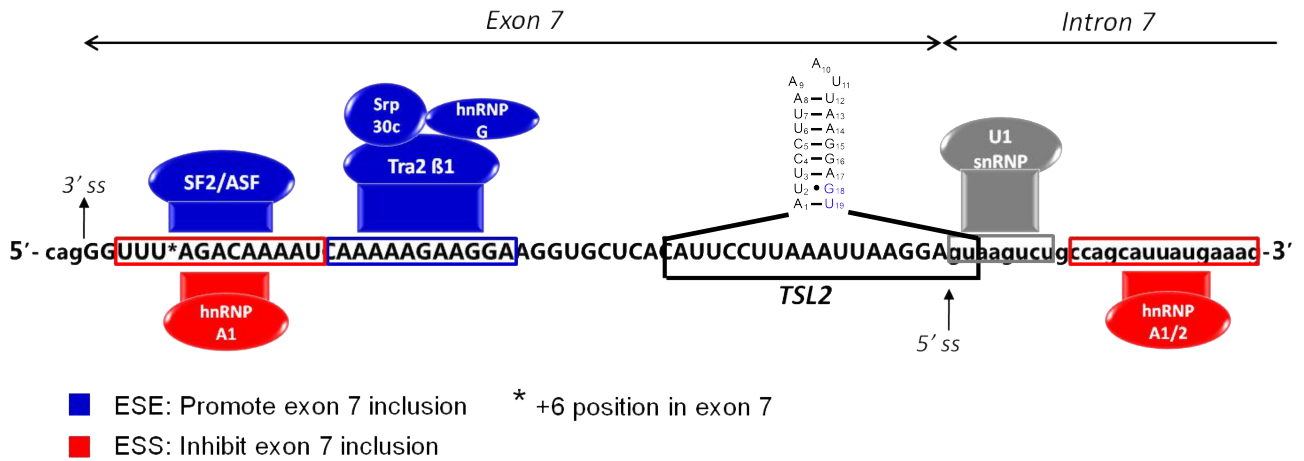

293 **Supplementary Figure 1. TSL2 location at the exon 7/intron 7 junction of the SMN transcripts.**

294 Diagram of exon 7 (E7; capital letters) and adjacent intronic sequence (small case) of the SMN  
 295 transcripts. Trans and cis-elements, which promote (blue) and inhibit (red) E7 inclusion, are  
 296 indicated. TSL2 (Terminal Stem-Loop 2) and its partial overlap with the 5' ss are outlined. The  
 297 predicted secondary structure of TSL2 is depicted. This figure was generated by the authors.

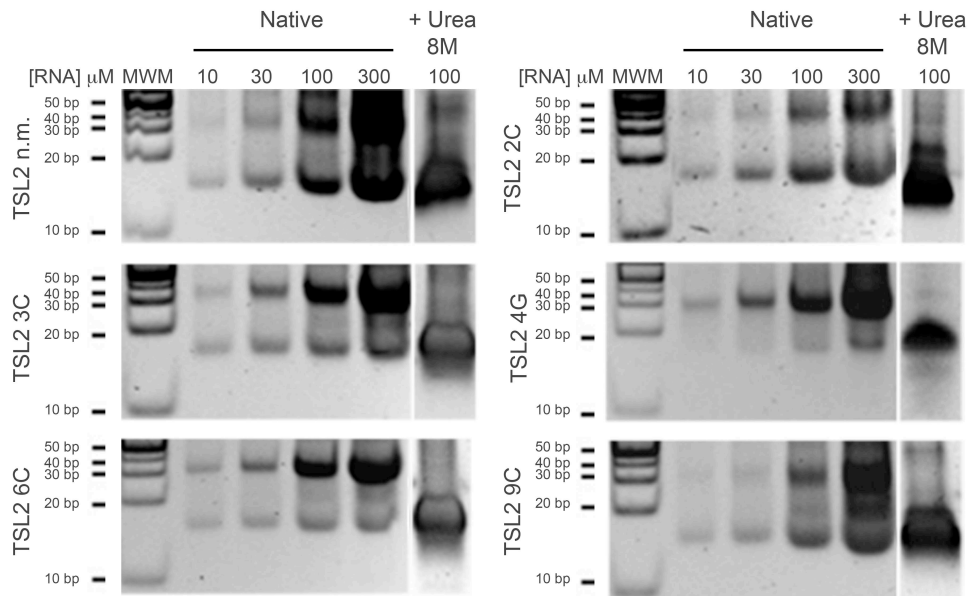

298 **Supplementary Figure 2. Visualization of *in vitro* TSL2 folding using polyacrylamide gel**  
 299 **electrophoresis (PAGE).** Native PAGE of synthetic, non-mutated (n.m.) TSL2 or synthetic TSL2  
 300 RNAs with the indicated mutations, folded by snap cooling (n=3). In all cases, the presence of TSL2  
 301 hairpin was detected (lower band), together with a higher molecular weight band, the size of which is  
 302 consistent with an RNA duplex. This upper band increased with RNA concentration (10, 30, 100 and  
 303 300  $\mu\text{M}$ ), supporting its duplex nature. Denaturing electrophoresis using Urea (8M) revealed only  
 304 one band, confirming that the two bands detected under native conditions represent folding states  
 305 and not contaminants from the RNA synthesis. MWM, molecular weight marker.

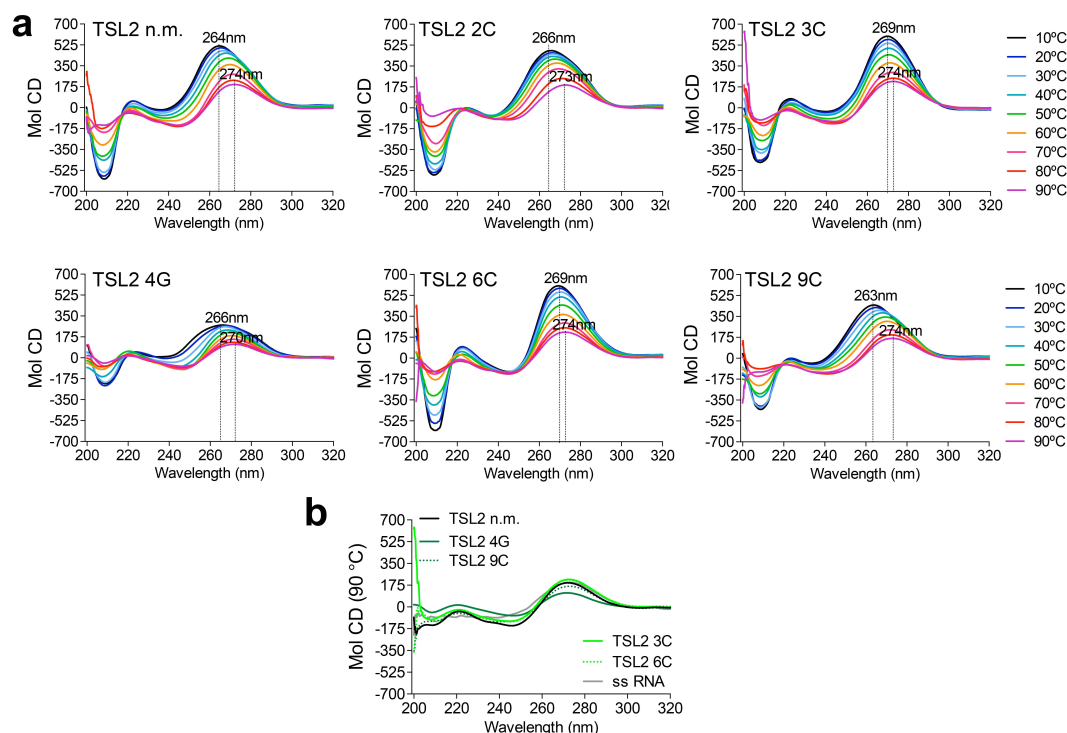

306 **Supplementary Figure 3. Circular Dichroism (CD) thermal spectra scanning of TSL2.** (a)  
 307 Temperature scan (10 °C to 90 °C) of synthetic, non-labeled TSL2 RNAs in its non-mutated form  
 308 (TSL2 n.m.) or carrying the indicated mutations. The positive peak of all mutated forms differ from  
 309 the n.m. TSL2 at temperatures where RNA is structured, but not at 90 °C (melted RNA, b) (n=10  
 310 scans). Compare with Fig. 1f. Positive CD peaks at ~265 nm are typical of RNA. A negative peak at  
 311 ~210 nm is typical of the A-form. Reduced intensity of the negative peak indicates loss of helicity. A  
 312 reduction in the positive CD signal indicates loss of base stacking. Wavelength shifts suggest  
 313 additional rearrangements. ss RNA, single stranded RNA (control). Mol CD, Molar Circular  
 314 Dichroism units.

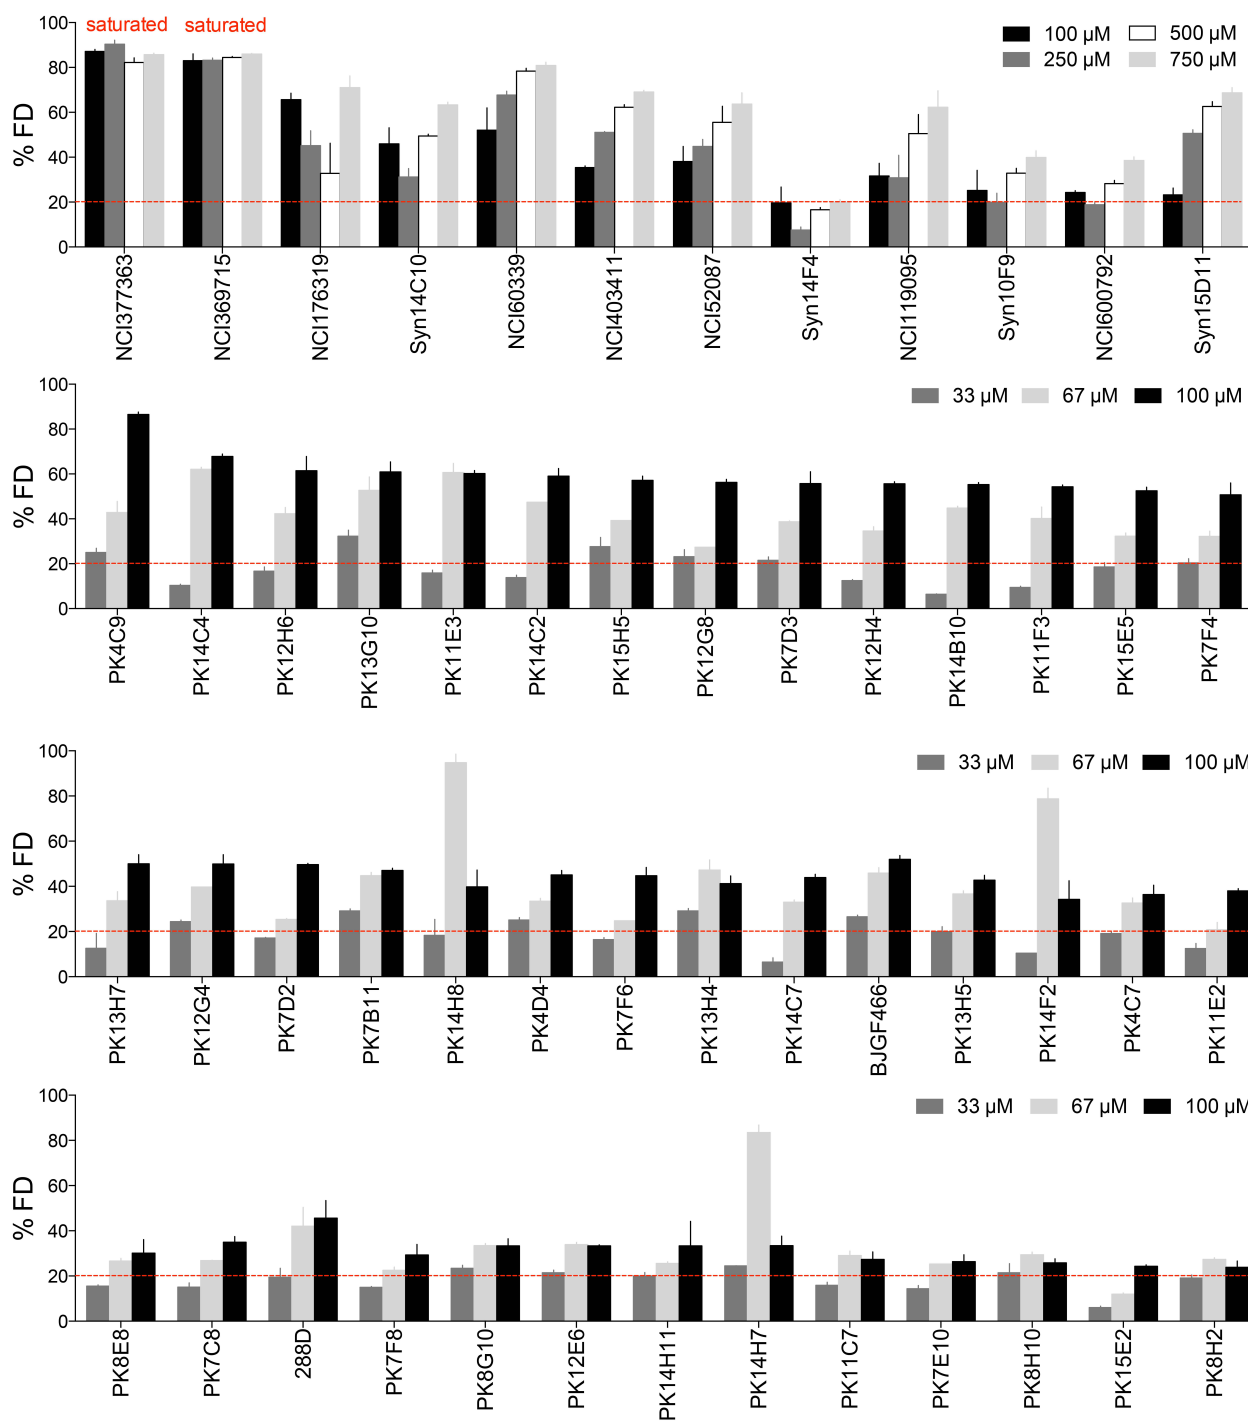

315 **Supplementary Figure 4. Dose-response of primary TSL2-interacting hits.** 45 out of the 54 hits  
 316 from the primary fluorescence displacement (FD) screening showed good dose-response behaviour  
 317 (n=4). All graphs represent mean values  $\pm$  SEM.



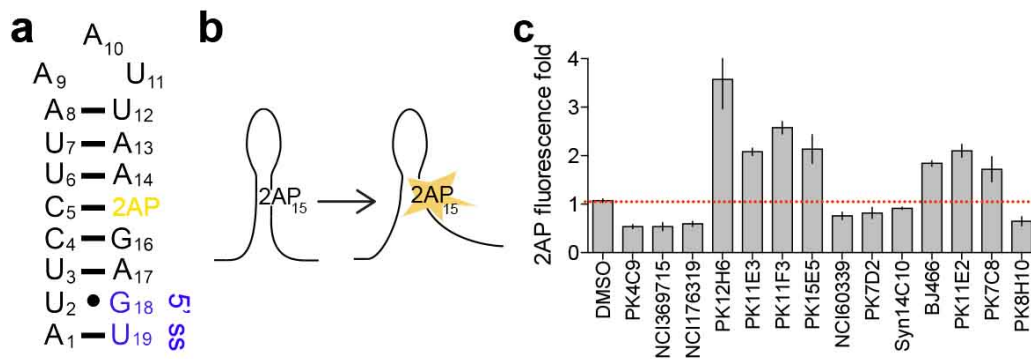

318 **Supplementary Figure 5. Primary TSL2-interacting hits with a conformational effect on TSL2.**  
319 (a) Diagram of the synthetic 2-amino purine (2AP)-labelled TSL2 RNA. 2AP was introduced at  
320 position 15, substituting its analogue G. (b) The fluorescence of 2AP is strongly quenched in a  
321 base-paired environment, but it increases as the harboring RNA structure relaxes. (c) 14 out of 28  
322 hits from the primary FD screening modified TSL2 base stacking, as measured by changes in the  
323 fluorescence of 2AP at the peak of maximum emission (365 nm) compared to the control wells (1%  
324 DMSO) (n=4). The remaining 17 hits from the 45 primary hits with good dose-response could not be  
325 tested due to autofluorescence interfering with the emission of 2AP. Graph represents mean values  
326 ± SEM.

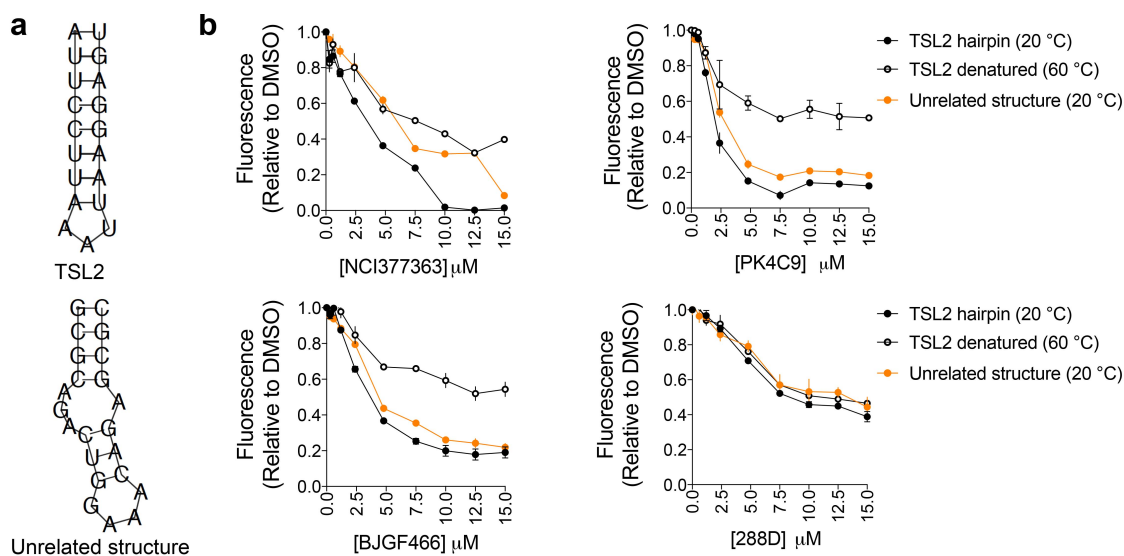

327 **Supplementary Figure 6. Fluorescence displacement assay for binding selectivity.** (a) A  
 328 fluorescence displacement assay was performed to rule out pan-nucleic acid binding, using the  
 329 RiboGreen dye. Binding of our most promising hits (NCI377363, PK4C9, BJG466, and 288D) to  
 330 native TSL2 was compared with binding to the following controls: an unrelated RNA structure and a  
 331 partially denatured TSL2 (60 °C). The sequence and predicted secondary structures (RNAfold  
 332 online tool) of both RNAs are shown. (b) NCI377363, PK4C9, and BJG466 showed significantly  
 333 higher fluorescence displacement with native TSL2 than with the control unrelated RNA structure,  
 334 indicating some binding selectivity. 288D showed weak binding to both. A dramatic decrease in  
 335 NCI377363, PK4C9 and BJGF466 binding was observed when TSL2 was, at least partially,  
 336 unfolded ( $T_m$  of TSL2 under the assay conditions is 45.6 °C), indicating that these hits target TSL2  
 337 structure rather than its primary sequence, and that they do not efficiently bind to single-strand  
 338 RNA. Conversely, 288D binding was not affected. Collectively, these results demonstrate that  
 339 NCI377363, PK4C9 and BJGF466 are not promiscuous RNA binders, whereas 288D seems to be.  
 340 Data points represent mean values  $\pm$  SEM ( $n=6$ ). RiboGreen can bind to double stranded and to  
 341 single stranded nucleic acids.

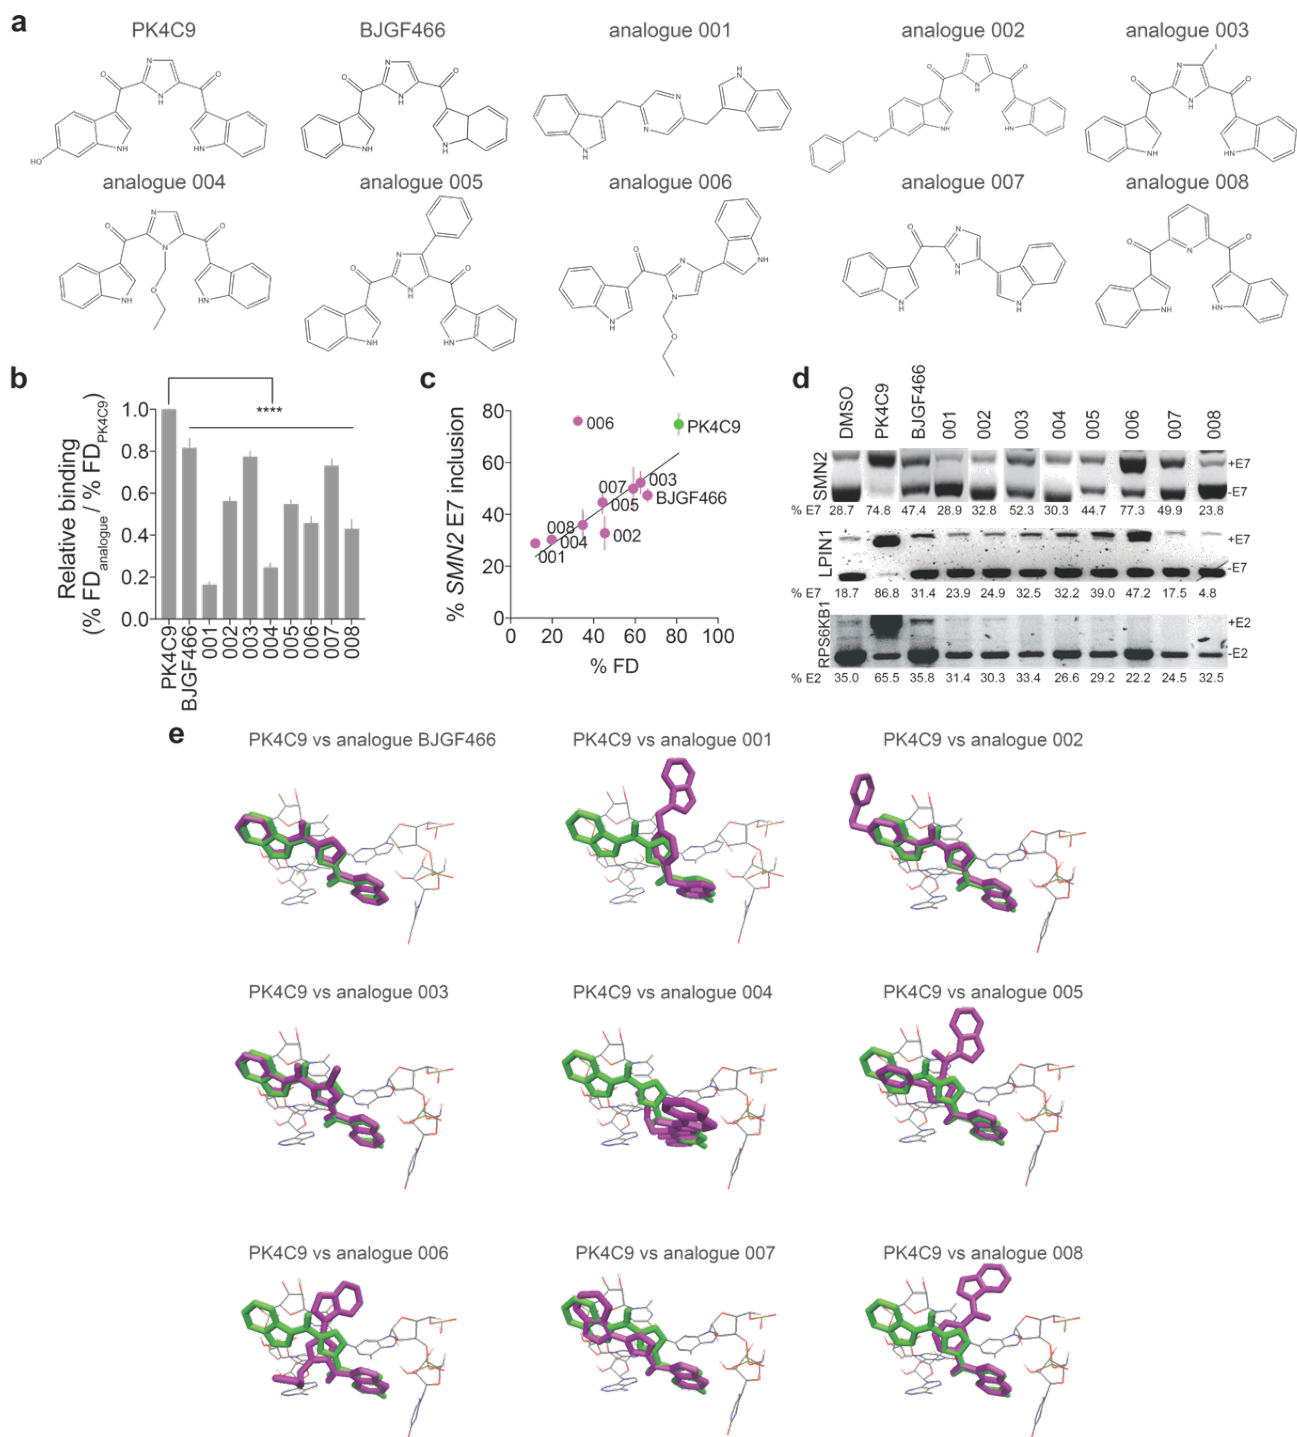

342 **Supplementary Figure 7. Structural analogues of PK4C9.** (a) Chemical structures of PK4C9,  
 343 BJGF466 and additional PK4C9 analogues (001-to-008) that were designed and synthesized in  
 344 house. (b) All structural analogues of PK4C9 showed reduced binding to TSL2 by fluorescence  
 345 displacement (FD, n=4). Binding values are shown normalized to PK4C9. (c) PK4C9 analogues  
 346 also had reduced *SMN2* E7 splicing modifier activity in transfected HeLa cells (40  $\mu$ M, 24 h; n=3),  
 347 which significantly correlated with their TSL2-binding levels ( $R^2$  0.90), with the exception of

348 analogue 006. This exception could be explained by the compensatory effect of other parameters  
349 (f.e., membrane permeability; logP 006 = 3.3 vs. logP PK4C9 = 1.5). 006 was excluded from the  
350 curve fitting. (d) Agarose gel showing RT-PCR bands of *SMN2* E7 splicing, as well as two PK4C9-  
351 sensitive splicing events that depend on SMN levels: *LPIN1* E7 and *RPS6KB1* E2 (also see Fig.  
352 4d). RT-PCR was performed on SMA fibroblasts treated with PK4C9, BJGF466 and analogues 001-  
353 to-008 at 40  $\mu$ M or 0.04 % DMSO (control) for 24 h (n=3 biological replicates). (e) Predicted binding  
354 pose of PK4C9 analogues to TSL2 as per molecular docking. No binding pose could be identified  
355 for analogues 001 and 004 that recapitulated the pose of PK4C9. Consistently, these two analogues  
356 displayed the lowest binding to TSL2 and the lowest *SMN2* splicing modifier activity (b, c). \*\*\*\*  
357  $p < 0.0001$ . Graph shows mean values  $\pm$  SEM. p-values were obtained by applying non-paired, two-  
358 tailed *t* tests with Bonferroni and Welch corrections.

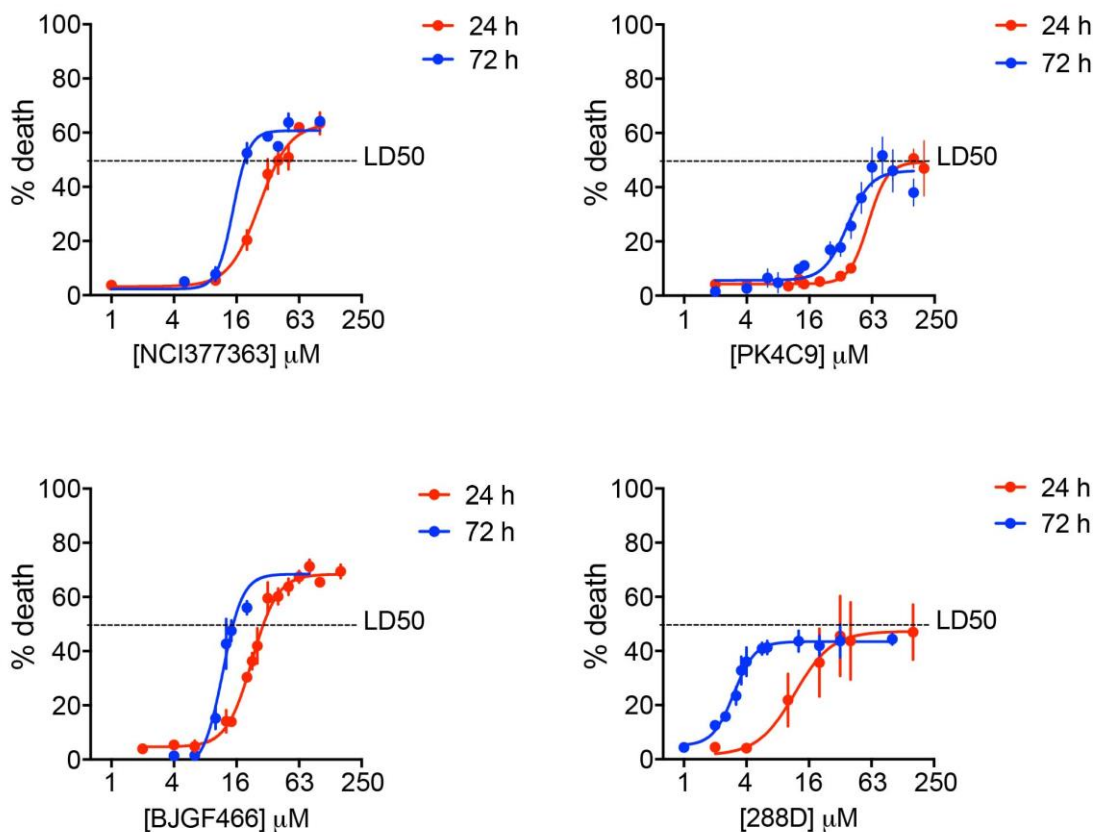

359 **Supplementary Figure 8. Cytotoxicity of splicing modifier hits in GM03814B fibroblasts.** To  
 360 determine the dose window between the activity and toxicity of our splicing modifier hits, we obtained  
 361 cell death curves after 24 h and 72 h of treatment in GM03814B fibroblasts, using the lactate  
 362 dehydrogenase (LDH) assay (n=12; 6 biological replicates and 2 technical replicates). The  
 363 percentage of death of compound-treated cells was calculated relative to DMSO-treated cells. A cell  
 364 lysis agent was used as the 100 % death control. LD50 were not calculated, since none of the  
 365 molecules reached 100 % cell death at any concentration. Of the six hits, PK4C9 showed the lowest  
 366 percentage of cell death (also see Main Fig. 3d). Data points represent mean values  $\pm$  SEM.  
 367

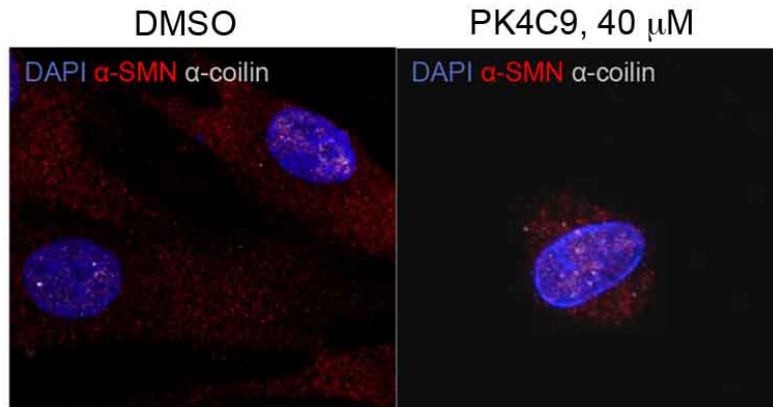

368 **Supplementary Figure 9. PK4C9 restores SMN in GM03813C cells.** Double antibody staining  
369 showing the increase in SMN (red) in the cytoplasm and nucleus of GM03813C fibroblasts after  
370 treatment with PK4C9 (40 μM), and its restored localization in nuclear gems (coilin-p80, white;  
371 quantified in Fig. 4c). (n=30 cells from 3 biological replicates).

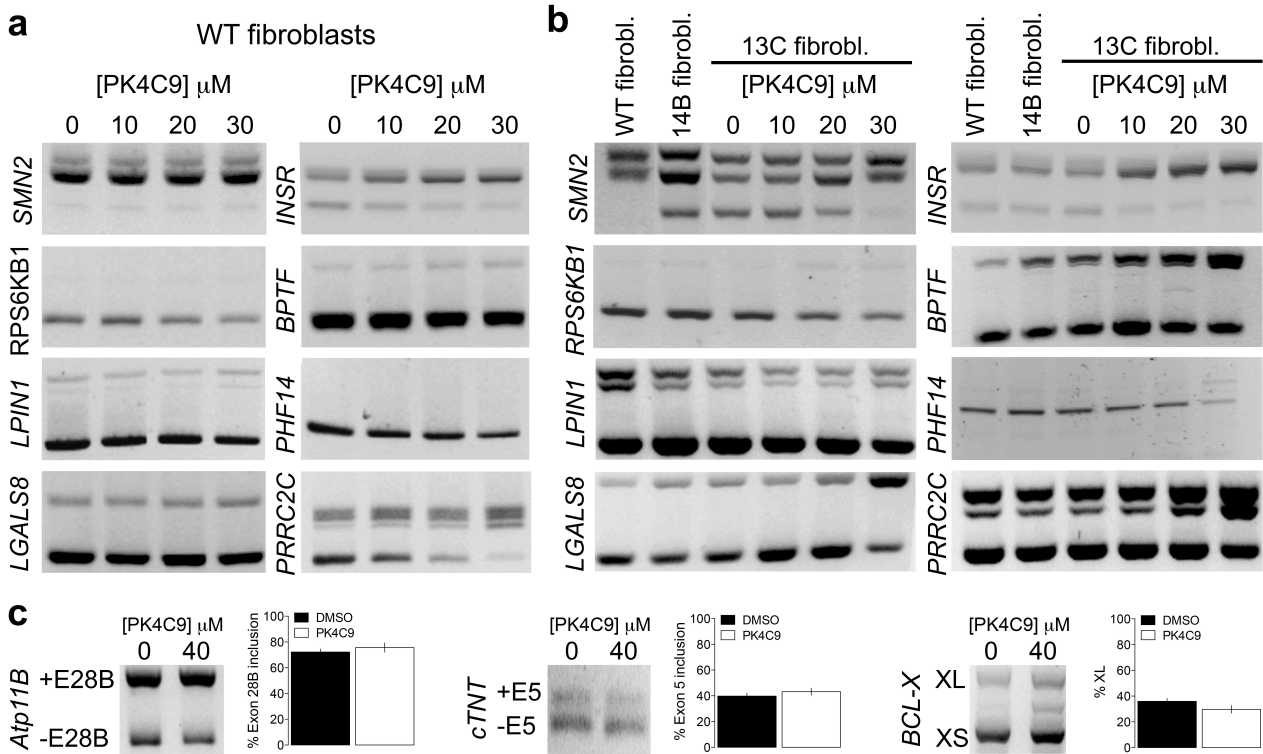

**Supplementary Figure 10. Effect of PK4C9 on the splicing of SMN-regulated transcripts.**

Agarose gels from RT-PCR of ND36091A (WT, a), GM03814B (b) and GM03813C (SMA, b) fibroblasts showing the effect of PK4C9 (24 h) on selected transcripts known to be SMN-regulated<sup>48-50</sup> and identified as PK4C9-sensitive in our RNA-seq experiment (see also Fig. 4d). SMN2 is shown as a positive control. (c) RT-PCR of transcripts the splicing of which is not SMN-mediated and that were not affected in our RNA-seq experiment, used here as negative controls. All bars represent mean values  $\pm$  SEM. (n=8; 4 biological replicates and 2 technical replicates)

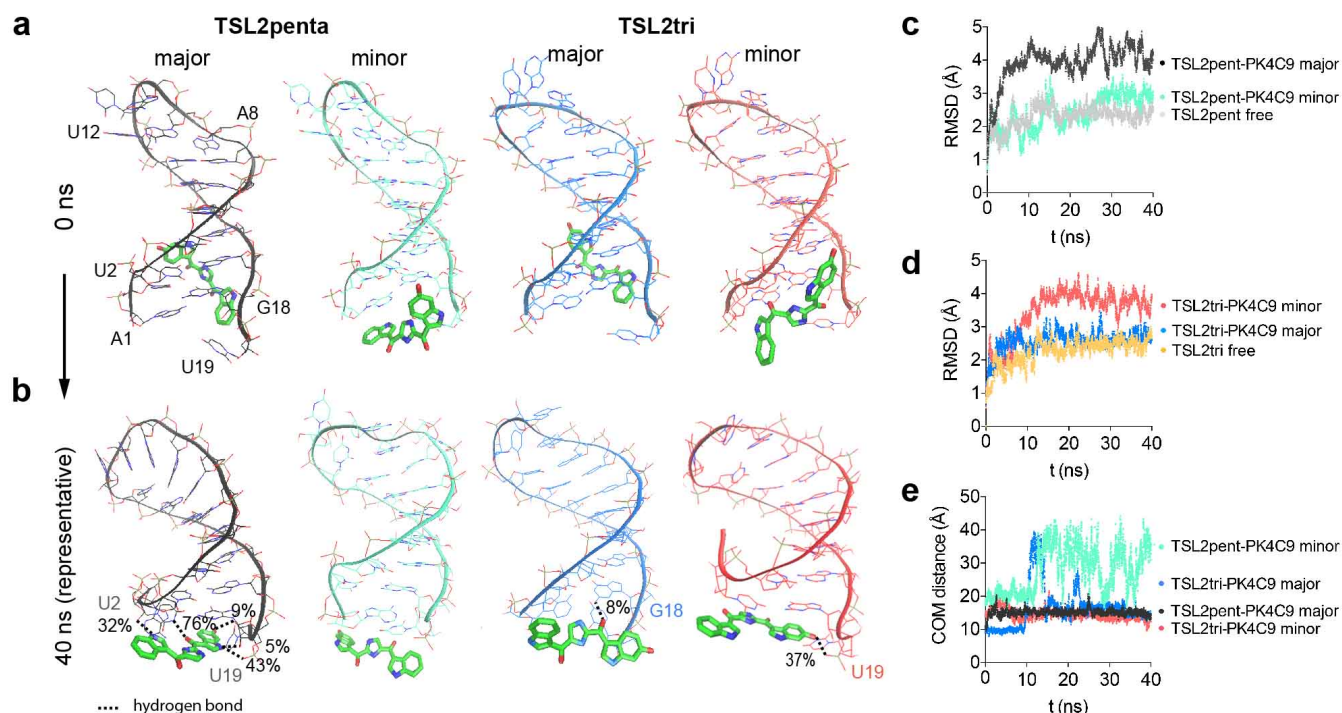

380 **Supplementary Figure 11. Generation of the starting PK4C9 binding model to TSL2.** One  
 381 representative triloop conformer (TSL2tri) and one pentaloop conformer (TSL2penta) were selected  
 382 from the 40 NMR structures as the unbound state of TSL2 (see Fig. 6). (a) Ligand docking was  
 383 applied to both structures in order to build a starting 3D model of the binding mode of PK4C9 to the  
 384 terminal region of TSL2, using a 15 Å grid around residues A1 and U2, and G18 and U19. Two  
 385 starting binding sites per structure were found, one in the major groove and one in the minor  
 386 groove. (b) To obtain a dynamic view of the evolution of these binding predictions, and assess their  
 387 stability, 40-ns MD simulations were conducted for each model, using the structures in (a) as  
 388 starting coordinates. The TSL2penta-PK4C9 major complex (hereafter referred to as TSL2pent-  
 389 PK4C9) showed the most stable interaction, with a reorganization of the ligand binding orientation  
 390 that allowed the highest frequency of hydrogen bonds with residues U2 and U19 (see also  
 391 Supplementary Movies 1 and 2). This stable complex was chosen for all subsequent structure-  
 392 activity analysis, and its MD trajectory was extended to 100 ns. Percentages (%) indicate hydrogen  
 393 bond frequency. (c, d) The RMSD of all simulations, which measures the deviation from the starting  
 394 coordinates of all structures generated during the MD trajectory, reached equilibrium in all the  
 395 studied cases, confirming the stability of our NMR structures and of our modeled systems. (e)



396 Analysis of the distance between the center of mass (COM) of PK4C9 and the COM of TSL2  
397 supports that the TSL2pent-PK4C9 major model is the most stable.

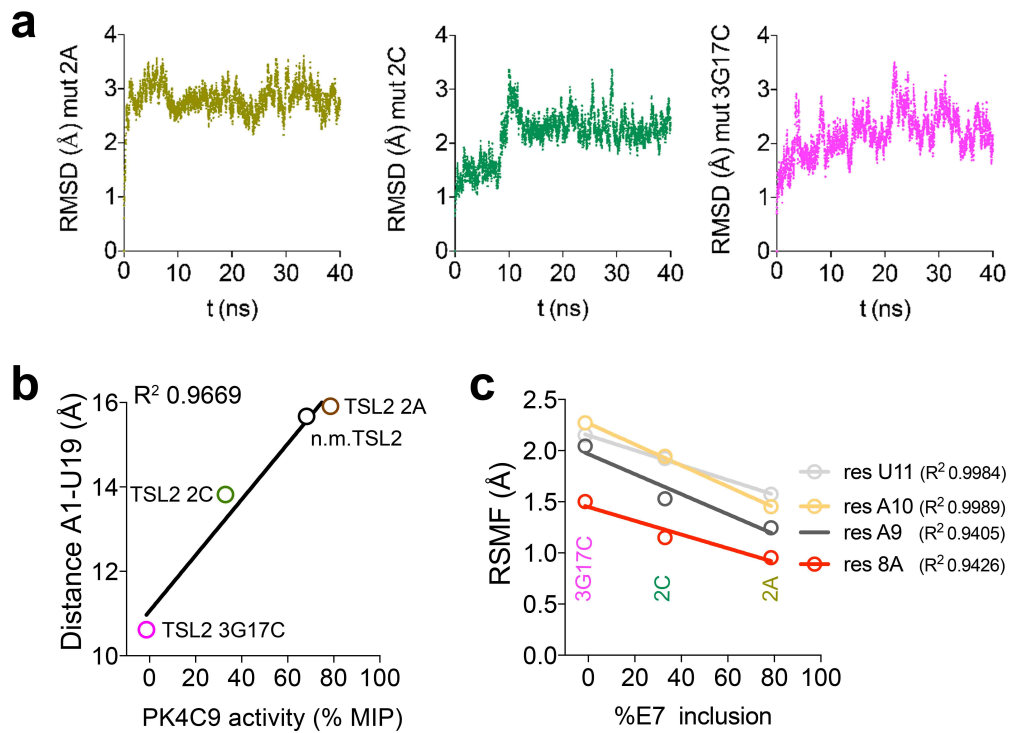

398

399 **Supplementary Figure 12. RMSD of TSL2 mutants and structural correlations with E7**  
 400 **splicing.** (a) The NMR structure of TSL2 in its pentaloop conformation was mutated *in silico* to  
 401 generate TSL2 mutants 2A, 2C, and 3G17C. These mutant versions of TSL2 were used as starting  
 402 points in 40-ns MD simulations. RMSD values confirmed that all three trajectories reached  
 403 equilibrium early in the simulation. (b) Terminal TSL2 opening at the 5' ss in n.m., 2A, 2C, and  
 404 3G17C correlates with PK4C9 activity. MIP, maximum E7 increment possible (see equation 2). (c)  
 405 The mobility of loop residues A8-to-U11 inversely correlates with PK4C9 activity.

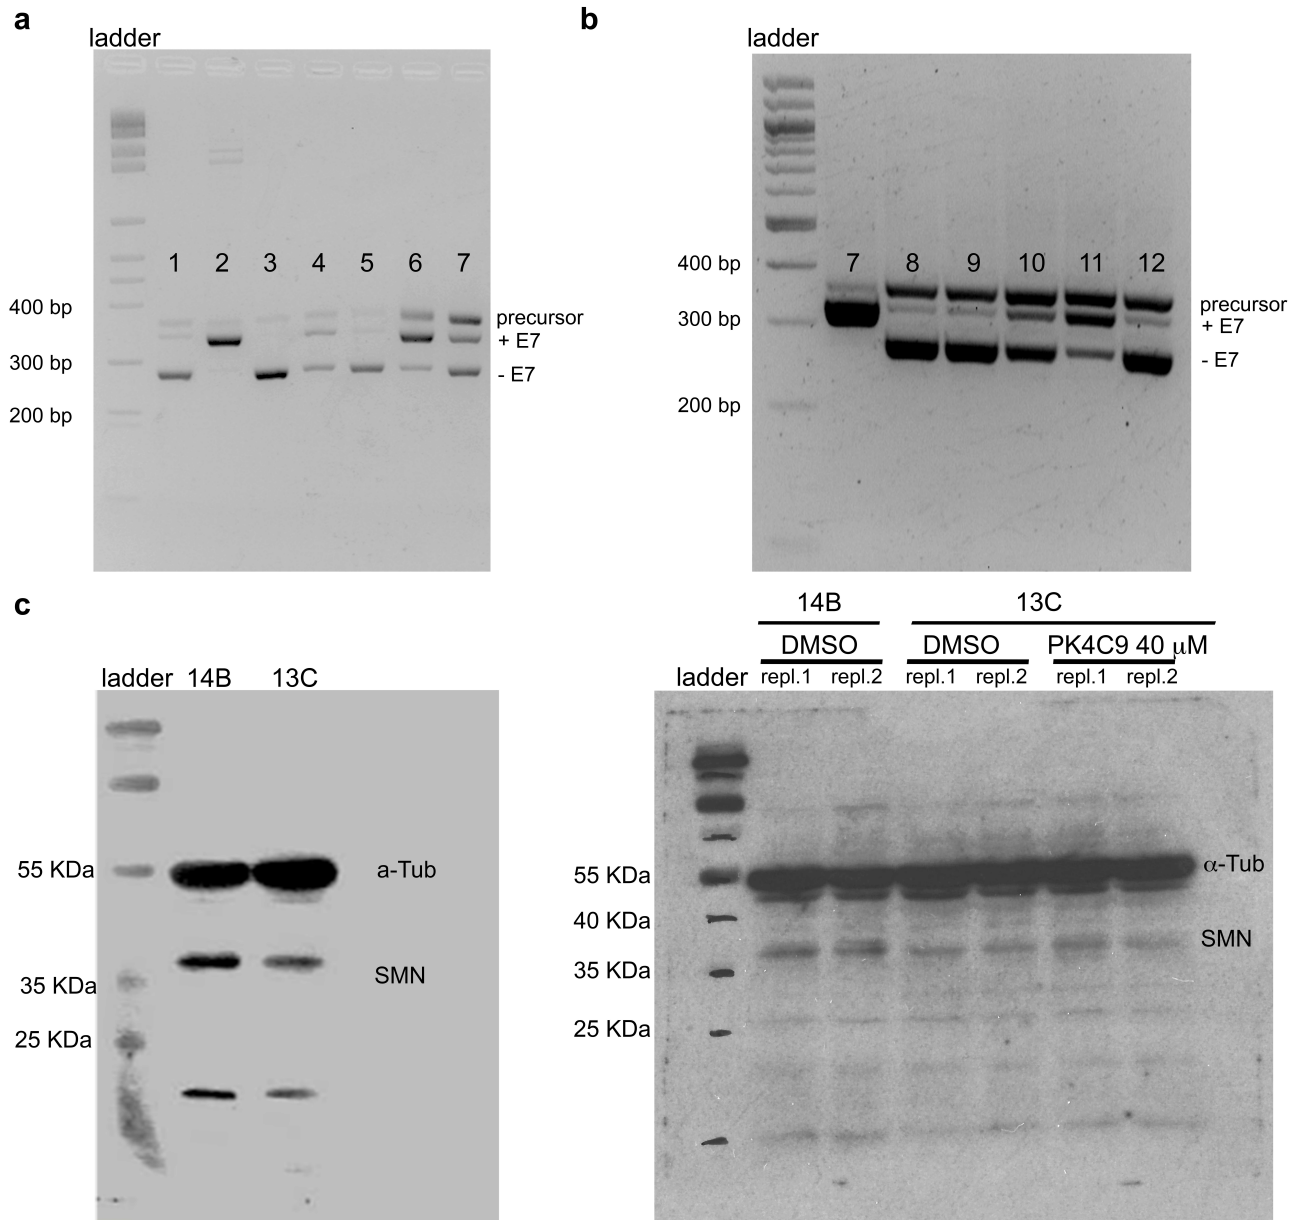

406

407 **Supplementary Figure 13. Full agarose gel and western blot images.** (a) Full RT-PCR agarose  
 408 gel image of Fig. 1b. 1, *SMN2*; 2, *SMN1*; 3, *SMN1* (TSL2 2C); 4, *SMN2* (TSL2 3C); 5, *SMN2* (TSL2  
 409 4G); 6, *SMN2* (TSL2 6C); 7, *SMN2* (TSL2 9C). (b) Full RT-PCR agarose gel image of Fig. 3a  
 410 (PK4C9, 24 h). 7, *SMN1*; 8, *SMN2* + DMSO; 9, *SMN2* + PK4C9 10 μM; 10, *SMN2* + PK4C9 20 μM;  
 411 11, *SMN2* + PK4C9 40 μM; 12, *SMN2* + PK4C9 80 μM. In (a, b) the higher molecular weigh band  
 412 corresponds to precursor *SMN* mRNA<sup>51</sup>. (c) Full western blot scan image of Fig 4a.

## Supplementary tables

Supplementary Table 1. Summary of results for structural mutations in TSL2

| TSL2 mutant  | % E7 (HeLa) | 2AP          | % hairpin | CD effect (vs. WT) | $\Delta$ PK4C9 activity | T <sub>m</sub> | MD                  |
|--------------|-------------|--------------|-----------|--------------------|-------------------------|----------------|---------------------|
| <b>WT</b>    | 16.7 ± 2.8  | 37.9 ± 0.6   | 34        | -                  | -                       | 45.6 ± 0.1     | triloop & pentaloop |
| <b>2A</b>    | 39.18 ± 2.4 | n.d.         | n.d.      | n.d.               | 18.4                    | 51.5 ± 0.1     | ↑ triloop           |
| <b>2C</b>    | 10.9 ± 1.2  | 80.9 ± 0.6   | 53        | n.d.               | -27.2                   | 51.8 ± 0.1     | triloop & pentaloop |
| <b>2G</b>    | 67.9 ± 1.6  | n.d.         | n.d.      | n.d.               | -6.8                    | 42.0 ± 0.0     | n.d.                |
| <b>3A</b>    | 42.1 ± 3.8  | n.d.         | n.d.      | n.d.               | 10.0                    | 51.1 ± 0.1     | n.d.                |
| <b>3C</b>    | 54.7 ± 5.2  | 145.4 ± 5.7  | 19        | peak shift         | -19.6                   | 44.7 ± 0.1     | n.d.                |
| <b>3G</b>    | 68.4 ± 3.1  | n.d.         | n.d.      | n.d.               | 8.3                     | 49.2 ± 0.1     | n.d.                |
| <b>4G</b>    | 21.5 ± 1.5  | 307.8 ± 11.9 | 8         | ↓ signal           | -6.8                    | 48.7 ± 0.1     | n.d.                |
| <b>6C</b>    | 62.6 ± 4.5  | 205.5 ± 3.9  | 13        | peak shift         | -16.9                   | 41.2 ± 0.2     | n.d.                |
| <b>9C</b>    | 47.6 ± 6.7  | 90.3 ± 0.3   | 28        | ↓ signal           | -10.4                   | 44.7 ± 0.1     | n.d.                |
| <b>17C</b>   | 86.3 ± 0.8  | n.d.         | n.d.      | n.d.               | 12.2                    | 47.6 ± 0.0     | n.d.                |
| <b>8G12C</b> | 95.5 ± 1.0  | n.d.         | n.d.      | n.d.               | n.d.                    | 52.2 ± 0.0     | n.d.                |
| <b>3G17C</b> | 12.5 ± 2.7  | n.d.         | n.d.      | n.d.               | -61.5                   | 51.0 ± 0.1     | ↑ pentaloop         |

% E7, percentage of E7 inclusion (Fig.1c); 2AP, 2-amino purine (Fig. 1d); % hairpin, in native PAGE (Fig. 1e); CD, Circular Dichroism (Fig. 1f); T<sub>m</sub>, melting temperature obtained by differential scanning fluorimetry (DSF) as described in<sup>47</sup>; MD, Molecular Dynamics (Fig. 7);  $\Delta$ PK4C9 activity, increment in PK4C9 activity. All values represent mean ± SEM, except for % hairpin and  $\Delta$ PK4C9 activity, which were calculated pooling all replicates together.

**Supplementary Table 2. TSL2-binding hits tested for E7 splicing**

|    |            | HeLa <sup>(1)</sup> |                                       |          |                   | GM03813C <sup>(2)</sup>               |          |                   |
|----|------------|---------------------|---------------------------------------|----------|-------------------|---------------------------------------|----------|-------------------|
|    | Molecule   | [ ] $\mu$ M         | E7 inclusion fold<br>(mean $\pm$ SEM) | p-value  | signifi-<br>cance | E7 exclusion fold<br>(mean $\pm$ SEM) | p-value  | signifi-<br>cance |
| 1  | PK4C9      | 40                  | 3.8 $\pm$ 0.3                         | < 0.0001 | ****              | 0.06 $\pm$ 0.01                       | < 0.0001 | ****              |
| 2  | BJGF466    | 40                  | 2.8 $\pm$ 0.1                         | < 0.0001 | ****              | 0.7 $\pm$ 0.2                         | 0.0102   | *                 |
| 3  | 288D       | 40                  | 2.6 $\pm$ 0.1                         | < 0.0001 | ****              | 0.7 $\pm$ 0.08                        | 0.0003   | ***               |
| 4  | NCI377363  | 10                  | 2.5 $\pm$ 0.3                         | < 0.0001 | ****              | 0.3 $\pm$ 0.09                        | < 0.0001 | ****              |
| 5  | PK7C8      | 40                  | 2.3 $\pm$ 1.7                         | 0.0369   | *                 | not tested                            |          |                   |
| 6  | PK12G8 -Cl | 40                  | 2.1 $\pm$ 0.2                         | 0.0003   | ***               | 0.7 $\pm$ 0.3                         | 0.0377   | *                 |
| 7  | Syn14F4    | 40                  | 1.9 $\pm$ 0.1                         | 0.0002   | ***               | 0.9 $\pm$ 0.04                        | 0.0364   | *                 |
| 8  | NCI176319  | 20                  | 1.7 $\pm$ 0.1                         | 0.0156   | *                 | not tested                            |          |                   |
| 9  | PK12H6     | 2                   | 1.4 $\pm$ 0.1                         | 0.1645   | n.s.              |                                       |          |                   |
| 10 | PK11F3     | 40                  | 1.2 $\pm$ 0.3                         | 0.4678   | n.s.              |                                       |          |                   |
| 11 | PK12G8     | 40                  | 1.3 $\pm$ 0.3                         | 0.5056   | n.s.              |                                       |          |                   |
| 12 | PK7D2      | 35                  | 1.2 $\pm$ 0.1                         | 0.3647   | n.s.              |                                       |          |                   |
| 13 | PK15E5     | 35                  | 1.1 $\pm$ 0.3                         | 0.6377   | n.s.              |                                       |          |                   |
| 14 | PK14C4     | 40                  | 1.1 $\pm$ 0.03                        | 0.0562   | n.s.              |                                       |          |                   |
| 15 | PK11E2     | 40                  | 1.0 $\pm$ 0.1                         | 0.9301   | n.s.              |                                       |          |                   |
| 16 | PK11E3     | 40                  | 0.97 $\pm$ 0.3                        | 0.9311   | n.s.              |                                       |          |                   |
| 17 | Syn14C10   | 35                  | 0.7 $\pm$ 0.1                         | 0.3534   | n.s.              |                                       |          |                   |
| 18 | PK12E6     | 40                  | 0.3                                   |          |                   |                                       |          |                   |
| 19 | NCI369715  | 10                  | 0.2                                   |          |                   |                                       |          |                   |

414 (1) RT-PCR of exons 6-to-8 from HeLa cells transfected with *SMN*<sup>E6-7-8</sup> minigenes and treated for 24 h at the indicated  
415 concentrations. (2) SMA fibroblasts, qRT-PCR of endogenous exon 7 exclusion after 24 h of treatment at 40  $\mu$ M (PK4C9,  
416 BJGF466, 288D, PK12G8-Cl, Syn14F4) or 20  $\mu$ M (NCI377363) (n=4). NCI176319 and PK7C8 were not tested on  
417 GM03813B cells due to toxicity. \* p<0.05, \*\*\* p<0.001, \*\*\*\* p<0.0001. n.s, non-significant. p-values were obtained by  
418 applying non-paired, two-tailed *t* tests with Bonferroni and Welch corrections.

419 **Supplementary Table 3. Numbers of junctions represented in Intropolis and RefSeq/Ensembl**  
 420 **GTF exon annotation**

|                                      | Intropolis Database | RefSeq/Ensembl GTF |
|--------------------------------------|---------------------|--------------------|
| begin and end coordinates present    | 399 (55.4%)         | 3 (0.4%)           |
| only begin coordinate present        | 138 (19.2%)         | 62 (8.6%)          |
| only end coordinate present          | 145 (20.1%)         | 74 (10.3%)         |
| begin and end coordinate not present | 38 (5.3%)           | 581 (80.7%)        |
| <b>Sum</b>                           | <b>720</b>          | <b>720</b>         |

## Supplementary Table 4. RNA and DNA oligos

| RNA oligos                              |                                                     |                                      |                   |
|-----------------------------------------|-----------------------------------------------------|--------------------------------------|-------------------|
| Oligo                                   | Label                                               | Sequence                             | Used in           |
| WT TSL2                                 | none                                                | AUUCUUUAAAUAAGGAGU                   | CD, PAGE, FD, NMR |
| 39C TSL2                                | none                                                | ACUCCUUAAAUAAGGAGU                   | CD, PAGE          |
| 40C TSL2                                | none                                                | AUCCUUAAAUAAGGAGU                    | CD, PAGE          |
| 41G TSL2                                | none                                                | AUUGC UUAAAUAAGGAGU                  | CD, PAGE          |
| 43C TSL2                                | none                                                | AUUC CUAAAUAAGGAGU                   | CD, PAGE          |
| 46C TSL2                                | none                                                | AUUCUUACAUUAAGGAGU                   | CD, PAGE          |
| 54G TSL2                                | none                                                | AUUCUUAAAUAAGGGU                     | CD, PAGE          |
| ssRNA                                   | none                                                | CAUUCUUAAAACCGUCCGAAA                | CD                |
| 2AP-WT TSL2                             | 2-amino purine                                      | AUUCUUAAAUAAG[2AMP]GAGU              | fluorim.          |
| 2AP-39C TSL2                            | 2-amino purine                                      | ACUCCUUAAAUAAG[2AMP]GAGU             | fluorim.          |
| 2AP-40C TSL2                            | 2-amino purine                                      | AUCCUUAAAUAAG[2AMP]GAGU              | fluorim.          |
| 2AP-41G TSL2                            | 2-amino purine                                      | AUUGC UUAAAUAAG[2AMP]GAGU            | fluorim.          |
| 2AP-43C TSL2                            | 2-amino purine                                      | AUUC CUAAAUAAG[2AMP]GAGU             | fluorim.          |
| 2AP-46C TSL2                            | 2-amino purine                                      | AUUCUUACAUUAAG[2AMP]GAGU             | fluorim.          |
| 2AP-54G TSL2                            | 2-amino purine                                      | AUUCUUAAAUAAG[2AMP]GGU               | fluorim.          |
| <sup>13</sup> C- <sup>15</sup> N-A-TSL2 | <sup>13</sup> C10, <sup>15</sup> N5 in all adenines | AUUCUUAAAUAAGGAGU                    | NMR               |
| DNA oligos for semi-quantitative PCR    |                                                     |                                      |                   |
| Oligo                                   |                                                     | Sequence (5'→3')                     | Tm, cycles        |
| <b>SMN2 and SMN1 minigenes, HeLa</b>    |                                                     |                                      |                   |
| P1 (fw)                                 |                                                     | CGACTCACTATAGGCTAGCC                 | 58°C, 30x         |
| P2 (rev)                                |                                                     | GCATGCAAGCTTCCTTTTTTCTTCCCAACAC      | 58°C, 30x         |
| <b>Endogenous SMN2, fibroblasts</b>     |                                                     |                                      |                   |
| N24 (fw)                                |                                                     | CCAGATTCTCTTGATGATGCTGATGCTTTGGG     | 58°C, 30x         |
| P2 (rev)                                |                                                     | GCATGCAAGCTTCCTTTTTTCTTCCCAACAC      | 58°C, 30x         |
| <b>SMN2 minigene, Drosophila</b>        |                                                     |                                      |                   |
| SMN2 (fw)                               |                                                     | TCTGATGCTTTGGGAGTATGTT               | 60°C, 30x         |
| SMN2 (rev)                              |                                                     | CAGCGTAAGTGATGTCCACCT                | 60°C, 30x         |
| <b>Others</b>                           |                                                     |                                      |                   |
| cTNTf                                   |                                                     | ATAGAAGAGGTGGTGGAAAGAGTAC            | 58°C, 30x         |
| cTNT <sub>r</sub>                       |                                                     | GTCTCAGCCTCTGCTTCAGCATCC             | 58°C, 30x         |
| Atp11Bf                                 |                                                     | GCTCCGGATCGATCCTGAGAACT              | 58°C, 30x         |
| Atp11Br                                 |                                                     | GTAACCATTATAAGCTGCAA                 | 58°C, 30x         |
| INSRf                                   |                                                     | CAAAGACAGACTCTCAGAT                  | 58°C, 30x         |
| INSRr                                   |                                                     | AACATCGCCAAGGGACCTGC                 | 58°C, 30x         |
| BCL-Xf                                  |                                                     | GGAGCTGGTGGTTGACTTTCT                | 58°C, 30x         |
| BCL-Xr                                  |                                                     | TAGAAGGCACAGTCGAGG                   | 58°C, 30x         |
| RPS6KB1f                                |                                                     | ACGCTGAACCTTAGGAGCCA                 | 58°C, 30x         |
| RPS6KB1r                                |                                                     | AGTTCCATATGGTCCAACCTCCC              | 58°C, 30x         |
| BPTFf                                   |                                                     | CCCCAACAAGCAGTACAACC                 | 58°C, 30x         |
| BPTFr                                   |                                                     | AGGTTTGCTGACTGGTACCT                 | 58°C, 30x         |
| LPIN1f                                  |                                                     | AGGAAAACCTCTCCCTGGC                  | 58°C, 30x         |
| LPIN1r                                  |                                                     | GCTCTCCCCACAGCCAAA                   | 58°C, 30x         |
| PHF14f                                  |                                                     | AGAGTTCCTAGAGAGAGAAGACA              | 58°C, 35x         |
| PHF14r                                  |                                                     | ACATATCCATCCGTAGCCTGT                | 58°C, 35x         |
| LGALS8f                                 |                                                     | ACCCAAGCATCTAGTCTGGA                 | 58°C, 30x         |
| LGALS8r                                 |                                                     | CGTGGGTTCAAGGTAGAGC                  | 58°C, 30x         |
| PRRC2Cf                                 |                                                     | GAACAGCCAGTCCAGCAAAA                 | 58°C, 30x         |
| PRRC2Cr                                 |                                                     | GCCTCCTCCTATCTGTTTGC                 | 58°C, 30x         |
| CPSF6f                                  |                                                     | CGTTTTCCAGGGGCTGTTT                  | 58°C, 30x         |
| CPSF6r                                  |                                                     | GGAGGAAGTGACCCAATG                   | 58°C, 30x         |
| DNA oligos and Taqman probes for qPCR   |                                                     |                                      |                   |
| Oligo                                   | [ nM ]                                              | Sequence (5'→3')                     |                   |
| SMN2 FL                                 | 900                                                 | GCTCACATTCCTTAAATTAAGGAGAAA          |                   |
| SMN2 ΔE7                                | 900                                                 | TGGCTATCATACTGGCTATTATATGGAA         |                   |
| SMN2rev                                 | 900                                                 | TCCAGATCTGTCTGATCGTTTCTT             |                   |
| Taqman SMN2                             | 250                                                 | 6FAM-CTGGCATAGAGCAGCACTAAATGACACCAC- | TAMRA             |
| GAPDHf                                  | 400                                                 | CAACGGATTTGGTCGTATTGG                |                   |

|               |     |                                |
|---------------|-----|--------------------------------|
| GAPDHr        | 400 | TGATGGCAACAATATCCACTTTACC      |
| Taqman GAPDH  | 125 | VIC-GCCTGGTCACCAGGGCTGCT-TAMRA |
| INSR-FL_fw    | 100 | CCCCAGAAAAACCTCTTCAGG          |
| INSR_rev      | 100 | GTCACATTCCCAACATCGCC           |
| Rps6kb1_FL_fw | 100 | TCTTCCAATCTTCCAGGGGTC          |
| Rps6kb1_rev   | 100 | TTCATATGGTCCAACCTCCCC          |
| Lpin1ΔE7fw    | 100 | TCACCCACTCCCAGTCCTTC           |
| Lpin1_rev     | 100 | CCTTCCGTGGACTTGCTGA            |
| PHF14_FL_fw   | 100 | TCTTGTGAGCAGGATGAGATTGT        |
| PHF14_rev     | 100 | ACATATCCATCCGTAGCCTGT          |
| Prrc2c_FL_fw  | 100 | GTCCTAGGTGTTGGCAAAGC           |
| Prrc2c_rev    | 100 | TCAGAGAAGAACCGTTGCGT           |

---

424 All RNA oligos were synthesized by Microsynth AG, GE Dharmacon, Thermo Fisher Scientific or Sigma Aldrich.

425 All DNA oligos and probes were synthesized by Microsynth AG or Thermo Fisher Scientific.



426  
427

## Supplementary References

- 428 1. Sklenář, V. & Bax, A. Spin-echo water suppression for the generation of pure-phase two-  
429 dimensional NMR spectra. *J Magn Res* **74**, 469-479 (1987).
- 430 2. Schanda, P., Kupče, Ě. & Brutscher, B. SOFAST-HMQC Experiments for Recording Two-  
431 dimensional Heteronuclear Correlation Spectra of Proteins within a Few Seconds. *J*  
432 *Biomol NMR* **33**, 199-211 (2005).
- 433 3. Jeener, J., Meier, B.H., Bachmann, P. & Ernst, R.R. Investigation of exchange processes by  
434 two-dimensional NMR spectroscopy. *J Chem Phys* **71**, 4546-4546 (1979).
- 435 4. Wagner, R. & Berger, S. Gradient-Selected NOESY—A Fourfold Reduction of the  
436 Measurement Time for the NOESY Experiment. *J Magn Res A* **123**, 119-121 (1996).
- 437 5. Bax, A. & Davis, D.G. MLEV-17-based two-dimensional homonuclear magnetization  
438 transfer spectroscopy. *J MagRes* **65**, 355-360 (1985).
- 439 6. Bodenhausen, G. & Ruben, D.J. Natural abundance nitrogen-15 NMR by enhanced  
440 heteronuclear spectroscopy. *Chem Phys Lett* **69**, 185-189 (1980).
- 441 7. Breeze, A.L. Isotope-filtered NMR methods for the study of biomolecular structure and  
442 interactions. *Prog Nucl Magn Reson Spectrosc* **36**, 323-372 (2000).
- 443 8. Ogura, K., Terasawa, H. & Inagaki, F. An improved double-tuned and isotope-filtered  
444 pulse scheme based on a pulsed field gradient and a wide-band inversion shaped pulse.  
445 *J Biomol NMR* **8**, 492-498 (1996).
- 446 9. Iwahara, J., Wojciak, J.M. & Clubb, R.T. Improved NMR spectra of a protein-DNA complex  
447 through rational mutagenesis and the application of a sensitivity optimized isotope-  
448 filtered NOESY experiment. *J Biomol NMR* **19**, 231-241 (2001).
- 449 10. Davis, A.L., Keeler, J., Laue, E.D. & Moskau, D. Experiments for recording pure-absorption  
450 heteronuclear correlation spectra using pulsed field gradients. *J Magn Res* **98**, 207-216  
451 (1992).
- 452 11. Kay, L.E., Xu, G.Y., Singer, A.U., Muhandiram, D.R. & Formankay, J.D. A gradient-enhanced  
453 HCCH-TOCSY experiment for recording side-chain <sup>1</sup>H and <sup>13</sup>C correlations in H<sub>2</sub>O  
454 samples of proteins. *J Magn Res B* **101**, 333-337 (1993).
- 455 12. Palmer, A.G., Cavanagh, J., Wright, P.E. & Rance, M. Sensitivity improvement in proton-  
456 detected two-dimensional heteronuclear correlation NMR spectroscopy. *J Magn Res* **93**,  
457 151-170 (1991).
- 458 13. Vuister, G.W. & Bax, A. Resolution enhancement and spectral editing of uniformly <sup>13</sup>C-  
459 enriched proteins by homonuclear broadband <sup>13</sup>C decoupling. *J Mag Res* **98**, 428-435  
460 (1992).
- 461 14. Ebrahimi, M., Rossi, P., Rogers, C. & Harbison, G.S. Dependence of <sup>13</sup>C NMR Chemical  
462 Shifts on Conformations of RNA Nucleosides and Nucleotides. *J Magn Res* **150**, 1-9  
463 (2001).
- 464 15. Ohlenschläger, O., Haumann, S., Ramachandran, R. & Görlach, M. Conformational  
465 signatures of <sup>13</sup>C chemical shifts in RNA ribose. *J Biomol NMR* **42**, 139-142 (2008).
- 466 16. Brünger, A.T., *et al.* Crystallography & NMR system: A new software suite for  
467 macromolecular structure determination. *Acta Crystallogr. D Biol Crystallogr* **54**,  
468 905-921 (1998).
- 469 17. Linge, J.P., O'Donoghue, S.I. & Nilges, M. Automated assignment of ambiguous nuclear  
470 overhauser effects with ARIA. *Methods Enzymol* **339**, 71-90 (2001).
- 471 18. Nozinovic, S., Fürtig, B., Jonker, H.R.A., Richter, C. & Schwalbe, H. High-resolution NMR  
472 structure of an RNA model system: the 14-mer cUUCGg tetraloop hairpin RNA. *Nucleic*  
473 *Acids Res* **38**, 683-694 (2010).
- 474 19. Kneller, D.G. & Goddard, T.D. SPARKY. (University of California, San Francisco).

- 475 20. Linge, J.P., Williams, M.A., Spronk, C.A., Bonvin, A.M. & Nilges, M. Refinement of protein  
476 structures in explicit solvent. *Proteins* **50**, 496-506 (2003).
- 477 21. Hwang, T.L. & Shaka, A.J. Water suppression That works. Excitation sculpting using  
478 arbitrary wave-forms and pulsed-field gradients. *J Magn Res A* **112**, 275-279 (1995).
- 479 22. Schleucher, J., *et al.* A general enhancement scheme in heteronuclear multidimensional  
480 NMR employing pulsed field gradients. *J Biomol NMR* **4**, 301-306(1994).
- 481 23. Kay, L., Keifer, P. & Saarinen, T. Pure absorption gradient enhanced heteronuclear single  
482 quantum correlation spectroscopy with improved sensitivity. *J Am Chem Soc* **114**,  
483 10663-10665 (1992).
- 484 24. Wu, T.D. & Watanabe, C.K. GMAP: a genomic mapping and alignment program for mRNA  
485 and EST sequences. *Bioinformatics* **21**, 1859-1875 (2005).
- 486 25. Wu, T.D. & Nacu, S. Fast and SNP-tolerant detection of complex variants and splicing in  
487 short reads. *Bioinformatics* **26**, 873-881 (2010).
- 488 26. Mortazavi, A., Williams, B.A., McCue, K., Schaeffer, L. & Wold, B. Mapping and quantifying  
489 mammalian transcriptomes by RNA-Seq. *Nat Methods* **5**, 621-628 (2008).
- 490 27. Li, H., *et al.* The sequence alignment/map format and SAMtools. *Bioinformatics* **25**,  
491 2078-2079 (2009).
- 492 28. Robinson, M.D., McCarthy, D.J. & Smyth, G.K. edgeR: a Bioconductor package for  
493 differential expression analysis of digital gene expression data. *Bioinformatics* **26**, 139-  
494 140 (2010).
- 495 29. Wu, D. & Smyth, G.K. Camera: a competitive gene set test accounting for inter-gene  
496 correlation. *Nucleic Acids Res* **40**, e133 (2012).
- 497 30. Lawrence, C.E., *et al.* Detecting subtle sequence signals: a Gibbs sampling strategy for  
498 multiple alignment. *Science* **262**, 208-214 (1993).
- 499 31. Bailey, T.L. & Elkan, C. Fitting a mixture model by expectation maximization to discover  
500 motifs in biopolymers. *Proc Int Conf Intell Syst Mol Biol* **2**, 28-36 (1994).
- 501 32. Pavesi, G., Mereghetti, P., Mauri, G. & Pesole, G. Weeder Web: discovery of transcription  
502 factor binding sites in a set of sequences from co-regulated genes. *Nucleic Acids Res* **32**,  
503 W199-203 (2004).
- 504 33. Heinz, S., *et al.* Simple combinations of lineage-determining transcription factors prime  
505 cis-regulatory elements required for macrophage and B cell identities. *Mol Cell* **38**, 576-  
506 589 (2010).
- 507 34. Crooks, G.E., Hon, G., Chandonia, J.M. & Brenner, S.E. WebLogo: a sequence logo  
508 generator. *Genome Res* **14**, 1188-1190 (2004).
- 509 35. Case, D.A., Darden, T.A., Cheatham, III, T.E., Simmerling, C.L., Wang, J., Duke, R.E., Luo, R.,  
510 Walker, R.C., Zhang, W., Merz, K.M., Roberts, B., Hayik, S., Roitberg, A., Seabra, G., Swails,  
511 J., Götz, A.W., Kolossváry, I., Wong, K.F., Paesani, F., Vanicek, J., Wolf, R.M., Liu, J., Wu, X.,  
512 Brozell, S.R., Steinbrecher, T., Gohlke, H., Cai, Q., Ye, X., Wang, J., Hsieh, M.-J., Cui, G., Roe,  
513 D.R., Kovalenko, A. & Kollman P.A. AMBER 12. *University of California, San Francisco*  
514 (2012).
- 515 36. Perez, A., *et al.* Refinement of the AMBER force field for nucleic acids: improving the  
516 description of alpha/gamma conformers. *Biophys J* **92**, 3817-3829 (2007).
- 517 37. Zgarbova, M., *et al.* Refinement of the Cornell *et al.* Nucleic acids force field based on  
518 reference quantum chemical calculations of glycosidic torsion profiles. *J Chem Theory*  
519 *Comput* **7**, 2886-2902 (2011).
- 520 38. Wang, J., Wolf, R.M., Caldwell, J.W., Kollman, P.A. & Case, D.A. Development and testing of  
521 a general amber force field. *J Comput Chem* **25**, 1157-1174 (2004).

- 522 39. Roe, D.R. & Cheatham, T.E., 3rd. PTRAJ and CPPTRAJ: Software for processing and  
523 analysis of molecular dynamics trajectory data. *J Chem Theory Comput* **9**, 3084-3095  
524 (2013).
- 525 40. Montagne, C., Fournet, G. & Joseph, B. Synthesis of homocarbonyltopsentine derivatives.  
526 *Synthesis*, 136-146 (2005).
- 527 41. Montagne, C., Fournet, G. & Joseph, B. An efficient synthetic route to  
528 homocarbonyltopsentine. *Synlett*, 1533-1535 (2003).
- 529 42. Shaaban, M., Maskey, R.P., Wagner-Dobler, I. & Laatsch, H. Pharacine, a natural p-  
530 cyclophane and other indole derivatives from *Cytophaga* sp strain AM13.1. *J Nat Prod*  
531 **65**, 1660-1663 (2002).
- 532 43. Bartik, K., *et al.* Topsentins, New Toxic bis-indole alkaloids from the marine sponge  
533 topsentia-genitrix. *Can J Chem* **65**, 2118-2121 (1987).
- 534 44. Tsujii, S., *et al.* Topsentin, bromotopsentin, and dihydrodeoxybromotopsentin - antiviral  
535 and antitumor bis(indolyl)imidazoles from Caribbean deep-sea sponges of the family  
536 halichondriidae - structural and synthetic studies. *J Org Chem* **53**, 5446-5453 (1988).
- 537 45. Veale, C.G., *et al.* Synthetic analogues of the marine bisindole deoxytopsentin: potent  
538 selective inhibitors of MRSA pyruvate kinase. *J Nat Prod* **78**, 355-362 (2015).
- 539 46. Weinreb, S.M., Garigipati, R.S. & Gainor, J.A. Natural product synthesis via cyclo-  
540 additions with N-sulfinyl dienophiles. *Heterocycles* **21**, 309-324 (1984).
- 541 47. Silvers, R., Keller, H., Schwalbe, H. & Hengesbach, M. Differential scanning fluorimetry  
542 for monitoring RNA stability. *Chembiochem* **16**, 1109-1114 (2015).
- 543 48. Zhang, Z., *et al.* Dysregulation of synaptogenesis genes antecedes motor neuron  
544 pathology in spinal muscular atrophy. *Proc Natl Acad Sci U S A* **110**, 19348-19353  
545 (2013).
- 546 49. Zhang, Z., *et al.* SMN deficiency causes tissue-specific perturbations in the repertoire of  
547 snRNAs and widespread defects in splicing. *Cell* **133**, 585-600 (2008).
- 548 50. Baumer, D., *et al.* Alternative splicing events are a late feature of pathology in a mouse  
549 model of spinal muscular atrophy. *PLoS Genet* **5**, e1000773 (2009).
- 550 51. Singh, N.N., Singh, R.N. & Androphy, E.J. Modulating role of RNA structure in alternative  
551 splicing of a critical exon in the spinal muscular atrophy genes. *Nucleic Acids Res* **35**,  
552 371-389 (2007).
