# Supplementary material for: Targeting RNA structure in SMN2 reverses spinal muscular atrophy molecular phenotypes
Source: Nat Commun. 2018 May 23;9:2032. doi: 10.1038/s41467-018-04110-1 (PMC5966403; doi:10.1038/s41467-018-04110-1)
Supplement: Supplementary file 4 — Supplementary Data 1 [file 41467_2018_4110_MOESM4_ESM.xlsx]

## Sheet: validated HITS
Supplementary Data 1. Primary results from the TSL2-binding screening by FD
	ZINC CODE	100 - %FD (100 uM)	SE
NCI 377363	1590357	12.81	0.8864
PKRC-04-C09-09		13.5102	1.10249
NCI 369715	1587182	16.9447	3.00671
PKRC-14-C04		32.2037	1.07513
NCI 176313	1720639	37.28	3.372
PKRC-12-H06-09		38.5451	6.32051
PKRC-13-G10-33		39.0397	4.439
PKRC-11-E03-09		39.7733	1.34735
PKRC-14-C02		40.9797	3.45952
PKRC-15-H05-09		42.849	1.85431
PKRC-12-G08-09		43.7779	1.35754
PKRC-07-D03-09		44.2621	5.27763
PKRC-12-H04-09		44.3617	0.860473
PKRC-14-B10		44.7567	0.899289
PKRC-11-F03-09		45.6734	0.733105
PKRC-15-E05-09		47.5035	1.63507
NCI 60339	538110	47.9446	9.91996
PKRC-07-F04-09		49.3181	5.34844
PKRC-13-H07-33		50.0196	4.01853
PKRC-12-G04-09		50.0455	4.10581
PKRC-07-D02-09		50.3668	0.579894
PKRC-07-B11-09		52.912	0.900871
Syn 14.10C	26513872	54.0313	7.18618
PKRC-04-D04-09		54.8981	1.91346
PKRC-07-F06-09		55.3147	3.74438
PKRC-14-C07		56.0707	1.37244
BJGF466		56.43	1.08
PKRC-13-H05-33		57.2742	2.18612
PKRC-13-H04-33		58.775	3.40318
PKRC-14-H08		60.1774	7.40676
NCI 52087	324214	61.9271	6.76372
PKRC-11-E02-09		62.0188	1.03176
GP2		62.96	0.43
PKRC-04-C07-09		63.5654	4.08738
NCI 403411	122928	64.6351	0.786974
PKRC-07-C08-09		65.0675	2.5376
288D		65.47	7.36
PKRC-14-F02		65.7134	8.17409
PKRC-14-H07		66.6022	4.28685
PKRC-14-H11-09		66.6344	10.8256
PKRC-08-G10-09		66.638	3.16305
PKRC-12-E06-09		66.6803	0.496701
PKRC-08-E08-09		69.8468	5.92881
PKRC-07-F08-09		70.6459	4.61653
PKRC-11-C07-09		72.67	3.37
PKRC-07-E10-09		73.6369	3.03695
Syn 14.4F	1494930	73.6	3.59
NCI 119095	1708901	73.97	1.06
PKRC-08-H10-09		74.1589	1.74636
Syn 10.9F	6069162	74.84	8.98
NCI 600772	337321	75.7087	0.854405
PK15.E2		75.69	0.6
PKRC-08-H02-09		76.1069	2.69715
Syn 15.11D	12940181	76.7363	3.03979

## Sheet: NON HITS from synergia
compound name	ZINC CODE	100 - % FD (250 uM)	SE
19.07D	ZINC00054128	58.36	20.83
13.08F	ZINC06509614	80.55	0.5312
11.10C	ZINC03209151	82.19	4.824
7.03E	ZINC00097660	82.67	1.959
13.07D	ZINC03887547	83.55	1.047
12.08D	ZINC00314072	87.27	0.9116
3.09D	ZINC00488396	88.08	5.518
7.09B	ZINC00485539	88.19	7.293
18.08C	ZINC05286502	88.26	0.6342
7.05D	ZINC00489468	89.28	3.764
19.03D	ZINC02516806	88.73	0.5399
9.10C	ZINC00266878	90.27	0.6105
18.09C	ZINC05385585	92.22	2.19
19.07G	ZINC06070238	91.32	1.182
13.03D	ZINC00338895	92.18	2.557
20.07C	ZINC02557704	92.45	0.9891
9.10B	ZINC00266835	92.62	1.037
9.09G	ZINC04638824	93.19	3.038
11.08E	ZINC01226820	93.38	0.993
10.03D	ZINC00474617	94.09	1.775
7.05F	ZINC19088942	94.7	2.272
12.09G	ZINC03434615	95.02	2.399
14.09B	ZINC01866749	96.18	1.501
19.03B	ZINC00331466	97.09	1.684
8.09D	ZINC01580838	97.6	2.072
19.03C	ZINC00331468	97.85	2.206
16.11B	ZINC58244306	98.73	2.813
7.05E	ZINC00873712	97.95	1.685
4.05F	ZINC42231108	98.7	2.96
2.06E	ZINC00079109	99.37	4.151
2.09F	ZINC12580863	100.3	4.255
2.08D	ZINC02860901	101.9	2.746
3.09B	ZINC00233904	102.1	5.561
2.04F	ZINC00178917	102.3	4.464
13.04G	ZINC08325649	103.6	1.63
13.07G	ZINC10922095	103.6	1.875
17.06B	ZINC04237889	105.8	2.763
1.09B	ZINC17148901	106.7	3.621
17.10F	ZINC00485519	111.8	9.977
14.11F	ZINC12506052	190.9	20.08

## Sheet: NON HITS from NCI library
compounds name	ZINC CODE	100 - % FD (250 uM)	SE
NCI Plated 2007 128801	4830873	61.74	6.19
NCI Plated 2007 53313	4722247	65.8	6.378
NCI Plated 2007 17602	1758871	67.94	5.847
NCI Plated 2007 77889	8616457	75.22	1.443
NCI Plated 2007 600523	13215333	82.12	0.9314
NCI Diveryesty 3 146770	1728888	85.17	2.41
NCI Plated 2007 683791	1649605	86.58	1.361
NCI Plated 2007 114971	5004220	90.24	2.051
NCI Plated 2007 405275	13212682	94.35	11.19
NCI Plated 2007 11506	1718360	97.16	1.319
NCI Plated 2007 9921	1530775	100.6	1.476
NCI Plated 2007 54696	4722860	105.2	0.8647
NCI Plated 2007 87936	2022101	112.6	0.9588
NCI Plated 2007 353884	13211718	116.5	9.297

## Sheet: NON HITS from PK library
compound name	100 - % FD (66 uM)	SE
PKRC-04-C05-09	89.71	3.362
PKRC-04-C06-09	84.1	2.636
PKRC-04-A06-09	87.77	2.405
PKRC-04-C08-09	91.71	2.327
PKRC-04-A02-09	90.3	0.8647
PKRC-04-A05-09	91.6	0.01969
PKRC-04-C10-09	94.13	2.376
PKRC-04-A04-09	95.37	0.9632
PKRC-04-C11-09	93.94	0.8609
PKRC-04-A09-09	98.53	0.4514
PKRC-04-D02-09	94.7	1.336
PKRC-04-A10-09	89.74	0.1191
PKRC-04-A11-09	76.5	0.5048
PKRC-04-D05-09	82.62	2.09
PKRC-04-B02-09	86.02	0.09489
PKRC-04-B04-09	89.2	0.25
PKRC-04-F03-09	78.77	0.1902
PKRC-04-B05-09	86.07	0.1268
PKRC-04-F04-09	86.93	1.394
PKRC-04-B10-09	95.65	2.27
PKRC-04-G06-09	96.66	2.195
PKRC-04-C04-09	86.93	2.53
PKRC-04-F08-09	88.09	3.726
PKRC-04-F09-09	87.67	3.519
PKRC-04-F10-09	89.45	3.35
PKRC-04-F11-09	90.87	0.8474
PKRC-05-E11-09	81.25	2.877
PKRC-05-E10-09	79.63	1.793
PKRC-05-E09-09	77.07	1.658
PKRC-06-G09-09	89.8	2.585
PKRC-06-H02-09	88.32	2.332
PKRC-07-A02-09	79.57	2.513
PKRC-07-F11-09	89.17	2.353
PKRC-07-B07-09	85.76	0.9857
PKRC-07-B08-09	89.95	4.853
PKRC-07-C10-09	79.23	5.163
PKRC-07-C11-09	83.22	2.622
PKRC-07-E02-09	82.95	0.9162
PKRC-07-E03-09	90.23	2.599
PKRC-07-E05-09	85.32	1.847
PKRC-07-E07-09	90.11	2.325
PKRC-07-E09-09	91.82
PKRC-07-E08-09	43.62
PKRC-07-E11-09	80.4
PKRC-07-F02-09	88.33
PKRC-07-F03-09	82.66
PKRC-07-A03-09	82.95	3.219
PKRC-08-H07-09	87.94	4.938
PKRC-08-H08-09	86.47	2.324
PKRC-08-H11-09	88.49	2.34
PKRC-08-H09-09	70.27	2.902
PKRC-08-G11-09	73.86	1.342
PKRC-08-H03-09	99.61	4.157
PKRC-08-H04-09	81.63	1.627
PKRC-15-G06-09	89.02
PKRC-15-G07-09	86	3.809
PKRC-15-H02-09	81.21
PKRC-15-H03-09	59.06
PKRC-15-A02-09	66.93
PKRC-15-A03-09	11.07
PKRC-15-A04-09	88.34
PKRC-15-A05-09	82.42	3.216
PKRC-15-A06-09	85.92
PKRC-15-A08-09	81.61	0.9673
PKRC-15-A11-09	84.64	0.7699
PKRC-16-D07	78.01	4.477
PKRC-16-B07	75.37	1.133
PKRC-16-C07	78.27	4.235
PKRC-15-B02-09	70.05	0.2409
PKRC-10-B02-09	94.42	2.772
PKRC-10-B05-09	89.44	1.168
PKRC-11-D05-09	93.65	0.9017
PKRC-11-D04-09	96.48	0.1196
PKRC-11-D09-09	90.98	1.426
PKRC-12-G05-09	79.77	2.303
PKRC-12-E07-09	89.02
PKRC-12-G06-09	81.91
PKRC-12-E08-09	88.88
PKRC-12-G07-09	89.33
PKRC-12-E09-09	86.1	10.37
PKRC-12-E10-09	85.47
PKRC-12-G09-09	82.29
PKRC-12-E11-09	90.36
PKRC-12-G10-09	87.32	1.788
PKRC-12-F02-09	77.76	3.456
PKRC-12-F03-09	89.37	3.71
PKRC-12-F04-09	58.94
PKRC-12-F05-09	83.26	3.883
PKRC-12-F06-09	70.01	8.228
PKRC-12-F07-09	85.58	1.107
PKRC-12-F08-09	88.73	0.6968
PKRC-12-F09-09	86.68
PKRC-12-F10-09	96.56	11.36
PKRC-12-F11-09	99.22	7.813
PKRC-12-G02-09	86.91	0.2405
PKRC-12-G03-09	76.04	3.357
PKRC-12-H03-09	89.92	2.991
PKRC-12-H05-09	80.42	2.65
PKRC-12-H07-09	79.97	4.134
PKRC-12-E08-09	102.2	12.29
PKRC-14-G06-09	80	4.753
PKRC-14-G07-09	95.47	2.139
PKRC-14-G08-09	94.39	1.429
PKRC-14-G09-09	96.95	2.188
PKRC-14-H09-09	90.74	2.189
PKRC-14-H10-09	91.65	1.04
PKRC-15-C10-09	86.45	3.167
PKRC-15-C11-09	84.93	1.002
PKRC-15-D02-09	94.79	3.311
PKRC-15-D03-09	86.01	2.711
PKRC-15-D07-09	88.03	8.552
PKRC-15-D08-09	100.8	6.485
PKRC-15-B05-09	99.1	1.087
PKRC-15-B06-09	88.89	0.7586
PKRC-15-D09-09	91.24	0.6605
PKRC-15-B07-09	89.39	5.153
PKRC-15-D10-09	88.85	4.403
PKRC-15-B09-09	85.55	2.398
PKRC-15-E02-09	88.07	0.5304
PKRC-15-B10-09	92.82	3.809
PKRC-15-E03-09	94.1	5.049
PKRC-15-B11-09	86.91	2.393
PKRC-15-E04-09	112.6	25.53
PKRC-15-C02-09	94.75	2.897
PKRC-15-C04-09	77.39	1.66
PKRC-15-C05-09	77.12	5.321
PKRC-15-E06-09	79.52	2.579
PKRC-15-C06-09	91.5	1.679
PKRC-15-E07-09	89.64	1.523
PKRC-15-C07-09	87.96	0.8453
PKRC-15-E08-09	96.77	2.016
PKRC-15-C08-09	96.48	11.36
PKRC-15-E09-09	108.2	16.31
PKRC-15-C09-09	97.83	9.244
PKRC-15-E10-09	78.33	3.743
PKRC-15-F05-09	102.1	1.008
PKRC-15-E11-09	95.27	3.734
PKRC-15-F06-09	98.7	1.974
PKRC-15-F02-09	98.33	1.603
PKRC-15-F07-09	98.62	2.574
PKRC-15-F08-09	90.54	0.1239
PKRC-15-F03-09	76.47	3.643
PKRC-15-F09-09	90.9	3.208
PKRC-15-F04-09	99.2
PKRC-15-F10-09	91.41	1.121
PKRC-15-H10-09	87.59	1.013
PKRC-15-G02-09	92.58	1.852
PKRC-15-H11-09	122.2	4.371
PKRC-15-G03-09	99.94	0.8289
PKRC-15-G04-09	96.14	1.132
PKRC-15-G05-09	100.9	1.64
PKRC-13-E10-33	97.7	4.267
PKRC-13-E11-33	93.05	1.42
PKRC-13-F02-33	93.71	3.701
PKRC-13-F03-33	90.87	3.938
PKRC-13-F04-33	98.14	1.04
PKRC-13-F05-33	94.57	2.81
PKRC-13-F06-33	97.44	1.519
PKRC-13-F07-33	100.3	6.723
PKRC-13-F08-33	99.47	0
PKRC-13-F09-33	84.54	0.1468
PKRC-13-F10-33	93.12	2.622
PKRC-13-G11-33	73.83	1.488
PKRC-13-H02-33	72.62	0.9967
PKRC-13-H03-33	86.79	3.809
PKRC-13-H06-33	89.4	1.65
PKRC-13-H08-33	99.79	0.4296
PKRC-13-H10-33	81.52	0.6626
PKRC-08-E06-09	87.05	1.219
PKRC-08-E05-09	85.74	0.6604
PKRC-08-E10-09	63.18	6.859
PKRC-08-E07-09	87.2	0.3835
PKRC-11-C04-09	74.28	1.849
PKRC-11-C05-09	77.4	4.046
PKRC-11-C06-09	80.87	4.296
PKRC-11-C08-09	72.32	0.656
PKRC-11-C09-09	85.24	0.3977
PKRC-11-C10-09	88.02	0.7397
PKRC-11-C11-09	91.87	0.4852
PKRC-11-D06-09	85.46	2.659
PKRC-11-E07-09	76.07	6.506
PKRC-11-E08-09	78.24	5.491
PKRC-11-E09-09	92.35	6.79
PKRC-11-E11-09	82.11	3.103
PKRC-14-B07	67.91	6.778
PKRC-14-B08	76.36	5.352
PKRC-14-B05	88.17	0.02249
PKRC-14-E09	39.93	0.7541
PKRC-14-E10	81.88	3.984
PKRC-14-E11	62.14	0.7917
PKRC-14-F03	47.66	2.974
PKRC-14-F04	57.64	0.2372
PKRC-14-F05	28.68	3.066
PKRC-14-F06	52.23	6.361
PKRC-14-H06	44.64	4.205
