# Supplementary material for: Targeting RNA structure in SMN2 reverses spinal muscular atrophy molecular phenotypes
Source: Nat Commun. 2018 May 23;9:2032. doi: 10.1038/s41467-018-04110-1 (PMC5966403; doi:10.1038/s41467-018-04110-1)
Supplement: Supplementary file 5 — Supplementary Data 2 [file 41467_2018_4110_MOESM5_ESM.xlsx]

## Sheet: differentially spliced exons
Supp Data 2. Complete list of differently spliced exons in PK4C9-treated SMA fibroblasts
Gene	GeneID	EventID	EventType	Isoforms	Control_PSI	Control_DENS	SMA_PSI	SMA_DENS	max_dens	abs(deltaPSI)
EXOC1	55763	1	CASSETTE	RSN_HUM:XM_005265750,RSN_HUM:NM_018261,RSN_HUM:NM_178237,RSN_HUM:NM_001024924;RSN_HUM:XM_005265747,RSN_HUM:XM_005265748	0.987172	0.0024204	0.111384	0.00166183	0.0024204	0.875788
GOPC	57120	1	CASSETTE	RSN_HUM:NM_001017408;RSN_HUM:NM_020399	0.917535	0.0036658	0.0556539	0.00250836	0.0036658	0.861881
PIP5K1A	8394	2	CASSETTE	RSN_HUM:XM_005245528,RSN_HUM:NM_001135636,RSN_HUM:XM_005245531,RSN_HUM:XM_005245532;RSN_HUM:XM_005245525,RSN_HUM:NM_001135638,RSN_HUM:XM_005245530	0.939626	0.00160914	0.102882	0.00148973	0.00160914	0.836744
PIP5K1A	8394	9	CASSETTE	RSN_HUM:XM_005245529,RSN_HUM:NM_001135637,RSN_HUM:NM_003557;RSN_HUM:XM_005245526,RSN_HUM:XM_005245527	0.939626	0.00160914	0.102882	0.00148973	0.00160914	0.836744
FNIP1	96459	1	CASSETTE	RSN_HUM:NM_001008738;RSN_HUM:NM_133372	0.969727	0.00091335	0.145957	0.0011661	0.0011661	0.82377
CBLL1	79872	2	CASSETTE	RSN_HUM:NM_024814;RSN_HUM:NR_024199	0.87414	0.00101322	0.0710454	0.00353858	0.00353858	0.803095
AGFG1	3267	3	LCASSETTE	RSN_HUM:NM_001135189;RSN_HUM:XM_005246516,RSN_HUM:NM_001135187	0.0526917	0.00156761	0.850752	0.00235039	0.00235039	0.79806
PHF14	9678	5	CASSETTE	RSN_HUM:NR_033436,RSN_HUM:XM_005249909;RSN_HUM:XM_005249908,RSN_HUM:XM_005249911	0.992522	0.00136632	0.199757	6.85834e-05	0.00136632	0.792765
BPTF	2186	3	CASSETTE	RSN_HUM:XM_005257153,RSN_HUM:XM_005257160,RSN_HUM:NM_004459,RSN_HUM:NM_182641;RSN_HUM:XM_005257150,RSN_HUM:XM_005257151,RSN_HUM:XM_005257152,RSN_HUM:XM_005257154,RSN_HUM:XM_005257155,RSN_HUM:XM_005257156,RSN_HUM:XM_005257157,RSN_HUM:XM_005257158,RSN_HUM:XM_005257159,RSN_HUM:XM_005257161	0.904531	0.00173361	0.113554	0.00107086	0.00173361	0.790977
CLDN12	9069	2	CASSETTE	RSN_HUM:NM_012129;RSN_HUM:NM_001185072	0.808281	0.00113995	0.0185514	0.00087325	0.00113995	0.78973
SPOP	8405	14	LCASSETTE	RSN_HUM:NM_001007228;RSN_HUM:NM_001007230	0.90975	0.00247453	0.127456	0.000673173	0.00247453	0.782294
ABHD10	55347	1	CASSETTE	RSN_HUM:NM_018394,RSN_HUM:NR_073570,RSN_HUM:NR_073571;RSN_HUM:NM_001272069	0.969117	0.00147977	0.196965	0.0014368	0.00147977	0.772152
ZC3H13	23091	6	CASSETTE	RSN_HUM:XM_005266308,RSN_HUM:XM_005266309,RSN_HUM:XM_005266310,RSN_HUM:XM_005266311,RSN_HUM:NM_015070,RSN_HUM:XM_005266312;RSN_HUM:XM_005266301,RSN_HUM:XM_005266302,RSN_HUM:XM_005266303,RSN_HUM:XM_005266304,RSN_HUM:XM_005266305,RSN_HUM:XM_005266306,RSN_HUM:XM_005266307	0.902495	0.00292844	0.136711	0.00163703	0.00292844	0.765784
INTS7	25896	5	CASSETTE	RSN_HUM:NM_001199811,RSN_HUM:NM_001199812,RSN_HUM:NM_015434;RSN_HUM:NR_037667	1	0.0012776	0.234572	0.00153855	0.00153855	0.765428
ATP6V0A1	535	2	CASSETTE	RSN_HUM:NM_001130020,RSN_HUM:NM_005177,RSN_HUM:XM_005257463;RSN_HUM:NM_001130021,RSN_HUM:XM_005257459,RSN_HUM:XM_005257461	0.996784	0.0013993	0.232346	0.00234808	0.00234808	0.764438
FRYL	285527	2	CASSETTE	RSN_HUM:XM_005248085,RSN_HUM:XM_005248087;RSN_HUM:NM_015030,RSN_HUM:XM_005248082,RSN_HUM:XM_005248083,RSN_HUM:XM_005248084,RSN_HUM:XM_005248086,RSN_HUM:XM_005248088,RSN_HUM:XM_005248089,RSN_HUM:XM_005248090,RSN_HUM:XM_005248091,RSN_HUM:XM_005248093	0.955113	0.0010894	0.21107	0.000542	0.0010894	0.744043
RLIM	51132	1	CASSETTE	RSN_HUM:NM_016120;RSN_HUM:NM_183353	0.795537	0.00117845	0.0524574	0.00288806	0.00288806	0.74308
PRKAA1	5562	1	CASSETTE	RSN_HUM:NM_006251;RSN_HUM:NM_206907	0.899495	0.0025342	0.156876	0.00674207	0.00674207	0.742619
C6orf52	347744	3	CASSETTE	RSN_HUM:NM_001145020,RSN_HUM:NR_026737;RSN_HUM:NR_026736	1	1.8825e-05	0.258584	0.0013775	0.0013775	0.741416
HNRNPDL	9987	2	CASSETTE	RSN_HUM:NM_001207000,RSN_HUM:NM_031372;RSN_HUM:NR_003249	0.794069	0.010184	0.0546135	0.0274556	0.0274556	0.739456
TSEN15	116461	3	CASSETTE	RSN_HUM:NM_052965;RSN_HUM:NR_023349	0.983445	0.00285419	0.250832	0.00078754	0.00285419	0.732613
SPOP	8405	8	CASSETTE	RSN_HUM:NM_001007228;RSN_HUM:NM_001007227	0.93315	0.00241247	0.201207	0.000426426	0.00241247	0.731943
TBC1D15	64786	2	CASSETTE	RSN_HUM:NM_001146213,RSN_HUM:NM_001146214,RSN_HUM:NR_027449;RSN_HUM:NM_022771	0.923969	0.00212215	0.192552	0.00248739	0.00248739	0.731417
MEF2D	4209	1	CASSETTE	RSN_HUM:NM_001271629;RSN_HUM:NM_005920,RSN_HUM:XM_005245169,RSN_HUM:XM_005245170	0.938856	0.00242952	0.210662	0.00868642	0.00868642	0.728194
TIA1	7072	10	CASSETTE	RSN_HUM:NM_022173,RSN_HUM:XM_005264524,RSN_HUM:XM_005264525,RSN_HUM:XM_005264528,RSN_HUM:XM_005264533;RSN_HUM:XM_005264531	0.871606	0.00141427	0.147409	0.000366922	0.00141427	0.724197
LUC7L	55692	1	CASSETTE	RSN_HUM:XM_005255427,RSN_HUM:NM_018032,RSN_HUM:NM_201412,RSN_HUM:XM_005255426;RSN_HUM:XM_005255428,RSN_HUM:XM_005255429	0.921327	0.00236995	0.198069	0.00262232	0.00262232	0.723258
SPOP	8405	2	LCASSETTE	RSN_HUM:NM_001007228;RSN_HUM:NM_001007226	0.882184	0.00255185	0.162435	0.000528211	0.00255185	0.719749
TIA1	7072	9	INTERNAL5	RSN_HUM:NM_022173,RSN_HUM:XM_005264524,RSN_HUM:XM_005264525,RSN_HUM:XM_005264528,RSN_HUM:XM_005264533;RSN_HUM:XM_005264530,RSN_HUM:XM_005264532	0.88446	0.00137845	0.166038	0.000325754	0.00137845	0.718422
LPIN1	23175	2	CASSETTE	RSN_HUM:NM_001261427,RSN_HUM:NM_145693;RSN_HUM:NM_001261428,RSN_HUM:NM_001261429	0.796482	0.0010746	0.0798016	0.00237464	0.00237464	0.71668
RPS6KB1	6198	3	CASSETTE	RSN_HUM:NM_001272042,RSN_HUM:NM_001272043,RSN_HUM:NM_001272060,RSN_HUM:NM_003161;RSN_HUM:NM_001272044	0.930277	0.00160223	0.216349	0.00102843	0.00160223	0.713928
PRRC2C	23215	12	LCASSETTE	RSN_HUM:XM_005245023,RSN_HUM:XM_005245024,RSN_HUM:XM_005245027,RSN_HUM:XM_005245029,RSN_HUM:NM_015172;RSN_HUM:XM_005245020	0.902518	0.00255252	0.20016	0.00102851	0.00255252	0.702358
UBE3A	7337	12	LCASSETTE	RSN_HUM:NM_130839;RSN_HUM:XM_005268269	0.915876	0.00141428	0.216381	0.00142572	0.00142572	0.699495
ARHGAP21	57584	3	CASSETTE	RSN_HUM:XM_005252544;RSN_HUM:NM_020824,RSN_HUM:XM_005252542,RSN_HUM:XM_005252543,RSN_HUM:XM_005252546,RSN_HUM:XM_005252547	0.9731	0.00458915	0.281153	0.00388294	0.00458915	0.691947
LRRFIP1	9208	34	LCASSETTE	RSN_HUM:XM_005246118,RSN_HUM:XM_005246120;RSN_HUM:XM_005246137,RSN_HUM:XM_005246139,RSN_HUM:XM_005246140,RSN_HUM:XM_005246138,RSN_HUM:XM_005246112,RSN_HUM:XM_005246114,RSN_HUM:XM_005246117,RSN_HUM:XM_005246123,RSN_HUM:XM_005246127,RSN_HUM:XM_005246113	0.985538	0.000412997	0.295875	0.00160667	0.00160667	0.689663
LRRFIP1	9208	61	LCASSETTE	RSN_HUM:XM_005246121,RSN_HUM:XM_005246124;RSN_HUM:XM_005246114	0.94056	0.000432746	0.253925	0.00203652	0.00203652	0.686635
PRRC2C	23215	14	CASSETTE	RSN_HUM:XM_005245023,RSN_HUM:XM_005245024,RSN_HUM:XM_005245027,RSN_HUM:XM_005245029,RSN_HUM:NM_015172;RSN_HUM:XM_005245025,RSN_HUM:XM_005245026,RSN_HUM:XM_005245028	0.752947	0.00305958	0.0685974	0.00300109	0.00305958	0.68435
ADNP	23394	2	CASSETTE	RSN_HUM:NM_015339;RSN_HUM:NM_001282531	0.807671	0.00156685	0.125281	0.00167065	0.00167065	0.68239
METTL15	196074	1	CASSETTE	RSN_HUM:NM_001113528;RSN_HUM:NM_152636	0.842291	0.001148	0.160083	9.62e-05	0.001148	0.682208
AP1G1	164	1	CASSETTE	RSN_HUM:NM_001128;RSN_HUM:NM_001030007	0.733774	0.00318	0.0541484	0.0023768	0.00318	0.679626
ZNF267	10308	2	CASSETTE	RSN_HUM:NM_001265588,RSN_HUM:NM_003414;RSN_HUM:NR_049749	0.885697	0.00042475	0.208113	0.00477048	0.00477048	0.677584
MORF4L2	9643	2	CASSETTE	RSN_HUM:NM_001142419,RSN_HUM:NM_012286;RSN_HUM:NM_001142418,RSN_HUM:NM_001142422	0.746772	0.00624137	0.0722412	0.00640837	0.00640837	0.674531
TRNAU1AP	54952	1	CASSETTE	RSN_HUM:NM_017846;RSN_HUM:NR_003109	0.94114	0.00251652	0.267785	0.00239745	0.00251652	0.673355
THAP9-AS1	100499177	1	CASSETTE	RSN_HUM:NR_034076;RSN_HUM:NR_034075	0.933671	0.0020926	0.264148	0.006764	0.006764	0.669523
RBMS1	5937	2	CASSETTE	RSN_HUM:NM_002897,RSN_HUM:NM_016836;RSN_HUM:XM_005246737,RSN_HUM:XM_005246738,RSN_HUM:XM_005246739,RSN_HUM:XM_005246740,RSN_HUM:XM_005246741	0.7624	0.00466461	0.0956338	0.00537831	0.00537831	0.666766
NUPL2	11097	2	CASSETTE	RSN_HUM:NM_007342;RSN_HUM:XM_005249593,RSN_HUM:XM_005249592	0.9941	0.00114405	0.327814	0.000635726	0.00114405	0.666286
ARFGAP2	84364	2	CASSETTE	RSN_HUM:NM_001242832,RSN_HUM:NM_032389;RSN_HUM:XM_005253166,RSN_HUM:XM_005253167,RSN_HUM:XM_005253168	0.930324	0.00270777	0.264576	0.00161705	0.00270777	0.665748
DNAJC2	27000	2	CASSETTE	RSN_HUM:NM_001129887,RSN_HUM:NM_014377;RSN_HUM:XM_005250269	0.919238	0.00188765	0.254695	0.00074285	0.00188765	0.664543
TRPM7	54822	1	CASSETTE	RSN_HUM:NM_017672,RSN_HUM:XM_005254488;RSN_HUM:XM_005254486,RSN_HUM:XM_005254487,RSN_HUM:XM_005254489	0.910724	0.00141788	0.246728	0.00175145	0.00175145	0.663996
HMMR	3161	6	CASSETTE	RSN_HUM:NM_012485;RSN_HUM:NM_012484	0.766445	0.00171898	0.104272	0.00155843	0.00171898	0.662173
SMN2	6607	2	CASSETTE	RSN_HUM:NM_022875,RSN_HUM:NM_022877;RSN_HUM:NM_017411,RSN_HUM:NM_022876	0.760622	0.00167538	0.10465	0.000759674	0.00167538	0.655972
UBE3A	7337	4	LCASSETTE	RSN_HUM:NM_130839;RSN_HUM:XM_005268267	0.924618	0.0014009	0.268668	0.00114826	0.0014009	0.65595
TM2D3	80213	3	CASSETTE	RSN_HUM:NM_025141;RSN_HUM:NM_078474	0.762477	0.00245155	0.107718	0.00368276	0.00368276	0.654759
TIA1	7072	8	CASSETTE	RSN_HUM:NM_022037,RSN_HUM:NM_022173,RSN_HUM:XM_005264524,RSN_HUM:XM_005264525,RSN_HUM:XM_005264526,RSN_HUM:XM_005264527,RSN_HUM:XM_005264528,RSN_HUM:XM_005264530,RSN_HUM:XM_005264531,RSN_HUM:XM_005264532;RSN_HUM:XM_005264533	0.931117	0.00138786	0.27887	0.000282265	0.00138786	0.652247
VPS29	51699	5	MUT_M_EXCLU	RSN_HUM:NM_001282150;RSN_HUM:NR_104100	0.84146	0.000788207	0.191336	0.0014228	0.0014228	0.650124
PPP1R12A	4659	4	CASSETTE	RSN_HUM:NM_001143885,RSN_HUM:NM_001143886,RSN_HUM:NM_001244990,RSN_HUM:NM_001244992,RSN_HUM:NM_002480,RSN_HUM:XM_005268886,RSN_HUM:XM_005268892,RSN_HUM:XM_005268885,RSN_HUM:XM_005268891,RSN_HUM:XM_005268893;RSN_HUM:XM_005268887,RSN_HUM:XM_005268888	0.986229	0.00491614	0.337471	0.00135911	0.00491614	0.648758
CLASP1	23332	6	CASSETTE	RSN_HUM:NM_015282;RSN_HUM:NM_001142273,RSN_HUM:NM_001142274	0.72656	0.00129531	0.0778844	0.000128395	0.00129531	0.648676
UBE3A	7337	18	CASSETTE	RSN_HUM:NM_130839;RSN_HUM:NM_000462	0.980248	0.0013214	0.33202	0.000929162	0.0013214	0.648228
PPFIBP1	8496	3	CASSETTE	RSN_HUM:NM_001198915,RSN_HUM:NM_001198916,RSN_HUM:NM_177444,RSN_HUM:XM_005253509,RSN_HUM:XM_005253511,RSN_HUM:XM_005253515,RSN_HUM:XM_005253516;RSN_HUM:NM_003622,RSN_HUM:XM_005253505,RSN_HUM:XM_005253507,RSN_HUM:XM_005253508,RSN_HUM:XM_005253510,RSN_HUM:XM_005253514,RSN_HUM:XM_005253506	0.940886	0.00413886	0.292734	0.0038323	0.00413886	0.648152
FRS2	10818	4	LCASSETTE	RSN_HUM:NM_001042555,RSN_HUM:NM_001278354,RSN_HUM:NM_001278355,RSN_HUM:NM_001278356;RSN_HUM:NM_001278353	0.916518	0.00102058	0.268909	0.00132387	0.00132387	0.647609
RFC5	5985	1	CASSETTE	RSN_HUM:NM_001206801,RSN_HUM:NM_007370;RSN_HUM:NM_001130112	0.944307	0.00124472	0.29809	0.00050421	0.00124472	0.646217
LRRFIP1	9208	20	XCASSETTE	RSN_HUM:XM_005246128,RSN_HUM:XM_005246122,RSN_HUM:XM_005246125;RSN_HUM:XM_005246137,RSN_HUM:XM_005246139,RSN_HUM:XM_005246140,RSN_HUM:XM_005246138,RSN_HUM:XM_005246112,RSN_HUM:XM_005246114,RSN_HUM:XM_005246117,RSN_HUM:XM_005246123,RSN_HUM:XM_005246127,RSN_HUM:XM_005246113	0.953332	0.000428417	0.311857	0.00143631	0.00143631	0.641475
AGFG1	3267	5	CASSETTE	RSN_HUM:NM_001135189;RSN_HUM:NM_001135188,RSN_HUM:NM_004504	0.0212344	0.00388992	0.662467	0.00301841	0.00388992	0.641233
ZNF655	79027	23	MUT_EXCLU	RSN_HUM:XM_005250583;RSN_HUM:XM_005250581	0.268682	0.000429155	0.907824	0.00116819	0.00116819	0.639142
SYNRG	11276	2	CASSETTE	RSN_HUM:NM_001163546,RSN_HUM:NM_080550;RSN_HUM:NM_001163544,RSN_HUM:NM_001163545,RSN_HUM:NM_001163547,RSN_HUM:NM_007247,RSN_HUM:NM_198882	0.801361	0.00111298	0.164109	0.00145757	0.00145757	0.637252
ZNF655	79027	5	CASSETTE	RSN_HUM:NM_001083956,RSN_HUM:NM_001085368;RSN_HUM:XM_005250583	0.830635	0.0006672	0.200538	0.0013	0.0013	0.630097
UBE3A	7337	2	XCASSETTE	RSN_HUM:XM_005268271;RSN_HUM:XM_005268267	0.732519	0.00128911	0.103283	0.000934326	0.00128911	0.629236
VPS29	51699	9	CASSETTE	RSN_HUM:NM_001282151,RSN_HUM:NM_016226;RSN_HUM:NR_104100	0.972404	0.00298863	0.345325	0.00115993	0.00298863	0.627079
LRRFIP1	9208	36	XCASSETTE	RSN_HUM:XM_005246121,RSN_HUM:XM_005246124;RSN_HUM:XM_005246137,RSN_HUM:XM_005246139,RSN_HUM:XM_005246140,RSN_HUM:XM_005246138,RSN_HUM:XM_005246112,RSN_HUM:XM_005246117,RSN_HUM:XM_005246123,RSN_HUM:XM_005246127,RSN_HUM:XM_005246113	0.995225	0.000408977	0.371458	0.00139214	0.00139214	0.623767
LRRFIP2	9209	4	XCASSETTE	RSN_HUM:NM_001134369,RSN_HUM:NM_017724,RSN_HUM:XM_005265553,RSN_HUM:XM_005265554,RSN_HUM:XM_005265555,RSN_HUM:XM_005265556,RSN_HUM:XM_005265557;RSN_HUM:NM_001282691	0.969681	0.00511723	0.347377	0.00291319	0.00511723	0.622304
TJP1	7082	3	CASSETTE	RSN_HUM:XM_005254619,RSN_HUM:XM_005254620,RSN_HUM:NM_175610;RSN_HUM:XM_005254616,RSN_HUM:XM_005254617,RSN_HUM:XM_005254618,RSN_HUM:XM_005254621,RSN_HUM:NM_003257	0.747004	0.00288231	0.126528	0.00273063	0.00288231	0.620476
LGALS8	3964	2	CASSETTE	RSN_HUM:NM_201543,RSN_HUM:NM_201544;RSN_HUM:NM_201545,RSN_HUM:NM_006499	0.742702	0.00243045	0.123874	0.00140303	0.00243045	0.618828
CSNK2A1	1457	2	CASSETTE	RSN_HUM:NM_177560;RSN_HUM:NM_001895	0.150678	0.00528145	0.766882	0.0203036	0.0203036	0.616204
TBX3	6926	1	CASSETTE	RSN_HUM:NM_005996;RSN_HUM:NM_016569	0.665822	0.00644088	0.0502342	0.0033941	0.00644088	0.615588
CD44	960	21	XCASSETTE	RSN_HUM:NM_001001390;RSN_HUM:XM_005253232	0.76929	0.000502411	0.154128	0.00269191	0.00269191	0.615162
SS18	6760	1	CASSETTE	RSN_HUM:NM_005637;RSN_HUM:NM_001007559,RSN_HUM:XM_005258334	0.796573	0.00431235	0.183987	0.00126585	0.00431235	0.612586
CAD	790	1	CASSETTE	RSN_HUM:NM_004341,RSN_HUM:XM_005264557,RSN_HUM:XM_005264558;RSN_HUM:XM_005264555,RSN_HUM:XM_005264556	0.976026	0.00178943	0.364538	0.00153007	0.00178943	0.611488
SPOP	8405	15	CASSETTE	RSN_HUM:NM_001007228;RSN_HUM:NM_003563	0.86774	0.00259433	0.257349	0.0003334	0.00259433	0.610391
CD44	960	23	XCASSETTE	RSN_HUM:NM_001001390;RSN_HUM:XM_005253234	0.781031	0.000494859	0.171155	0.00242412	0.00242412	0.609876
LRRFIP1	9208	35	LCASSETTE	RSN_HUM:XM_005246119;RSN_HUM:XM_005246137,RSN_HUM:XM_005246139,RSN_HUM:XM_005246140,RSN_HUM:XM_005246138,RSN_HUM:XM_005246112,RSN_HUM:XM_005246114,RSN_HUM:XM_005246117,RSN_HUM:XM_005246123,RSN_HUM:XM_005246127,RSN_HUM:XM_005246113	0.943416	0.000431436	0.333998	0.00132673	0.00132673	0.609418
LRRFIP1	9208	5	CASSETTE	RSN_HUM:NM_001137550,RSN_HUM:XM_005246116;RSN_HUM:XM_005246137,RSN_HUM:XM_005246139,RSN_HUM:XM_005246140,RSN_HUM:XM_005246138,RSN_HUM:XM_005246112,RSN_HUM:XM_005246114,RSN_HUM:XM_005246117,RSN_HUM:XM_005246123,RSN_HUM:XM_005246127,RSN_HUM:XM_005246113	0.997875	0.000407891	0.389948	0.00137965	0.00137965	0.607927
VPS29	51699	4	CASSETTE	RSN_HUM:NM_001282150,RSN_HUM:NM_057180;RSN_HUM:NR_104099	0.9294	0.00158357	0.321699	0.00165465	0.00165465	0.607701
VPS29	51699	8	LCASSETTE	RSN_HUM:NM_001282151,RSN_HUM:NM_016226;RSN_HUM:NR_104099	0.77322	0.00375851	0.165632	0.00241833	0.00375851	0.607588
CD44	960	26	LCASSETTE	RSN_HUM:NM_001001390;RSN_HUM:XM_005253239	0.883895	0.000437269	0.280126	0.00148112	0.00148112	0.603769
ORC3	23595	7	CASSETTE	RSN_HUM:NM_012381,RSN_HUM:NM_181837,RSN_HUM:XM_005248704;RSN_HUM:XM_005248705	0.896892	0.00239457	0.296821	0.000634726	0.00239457	0.600071
RAPH1	65059	1	LCASSETTE	RSN_HUM:NM_213589;RSN_HUM:XM_005246777,RSN_HUM:XM_005246779,RSN_HUM:NM_203365	0.790891	0.000879515	0.191806	0.00427098	0.00427098	0.599085
SREK1	140890	1	CASSETTE	RSN_HUM:NM_001077199,RSN_HUM:XM_005248441,RSN_HUM:XM_005248442;RSN_HUM:NM_001270492,RSN_HUM:XM_005248439,RSN_HUM:NM_139168	0.899656	0.00180363	0.302183	0.000359716	0.00180363	0.597473
MGME1	92667	2	CASSETTE	RSN_HUM:XM_005260870,RSN_HUM:NM_052865;RSN_HUM:XM_005260866,RSN_HUM:XM_005260867	0.697652	0.00149981	0.103114	0.00277364	0.00277364	0.594538
SCAF8	22828	1	CASSETTE	RSN_HUM:NM_001286194;RSN_HUM:NM_001286189	0.860886	0.000892076	0.267363	0.00124045	0.00124045	0.593523
NBN	4683	1	CASSETTE	RSN_HUM:NM_002485;RSN_HUM:XM_005250923	0.800711	0.0022939	0.207618	0.00144255	0.0022939	0.593093
SLC25A17	10478	3	CASSETTE	RSN_HUM:NM_001282726,RSN_HUM:NM_006358,RSN_HUM:NR_104237;RSN_HUM:NR_104235	0.987904	0.00140027	0.395458	0.000390097	0.00140027	0.592446
CPSF6	11052	2	CASSETTE	RSN_HUM:NM_007007,RSN_HUM:XM_005268590;RSN_HUM:XM_005268588,RSN_HUM:XM_005268589	0.86691	0.0041964	0.275154	0.00422164	0.00422164	0.591756
UBE3A	7337	10	XCASSETTE	RSN_HUM:XM_005268271;RSN_HUM:XM_005268269	0.679376	0.00138995	0.0880221	0.00109632	0.00138995	0.591354
FXR1	8087	3	LCASSETTE	RSN_HUM:XM_005247816;RSN_HUM:XM_005247813,RSN_HUM:XM_005247815	0.73228	0.00642175	0.141262	0.0070886	0.0070886	0.591018
SEC31A	22872	11	CASSETTE	RSN_HUM:NM_001077208,RSN_HUM:NM_001191049,RSN_HUM:XM_005262850,RSN_HUM:XM_005262852;RSN_HUM:XM_005262849	0.832509	0.00138317	0.242172	0.00178179	0.00178179	0.590337
MTIF3	219402	3	CASSETTE	RSN_HUM:NM_001166261,RSN_HUM:NM_001166262,RSN_HUM:NM_152912,RSN_HUM:XM_005266283;RSN_HUM:NM_001166263	0.92573	0.00143968	0.337842	0.00087245	0.00143968	0.587888
SMAD5	4090	1	LCASSETTE	RSN_HUM:NM_001001420;RSN_HUM:NM_001001419	0.666023	0.00118735	0.083009	0.000892674	0.00118735	0.583014
RNF214	257160	2	INTERNAL5	RSN_HUM:NM_207343,RSN_HUM:NM_001077239;RSN_HUM:NM_001278249	0.902742	0.0013603	0.320399	0.000632648	0.0013603	0.582343
UBE3A	7337	8	CASSETTE	RSN_HUM:NM_130839;RSN_HUM:XM_005268268	0.878034	0.00147523	0.298263	0.00103432	0.00147523	0.579771
ZMAT3	64393	2	CASSETTE	RSN_HUM:NM_022470;RSN_HUM:NM_152240	0.838997	0.00116043	0.259528	0.00220978	0.00220978	0.579469
SPOP	8405	13	CASSETTE	RSN_HUM:NM_001007228;RSN_HUM:NM_001007229	0.888661	0.00253325	0.309319	0.000277383	0.00253325	0.579342
HMMR	3161	3	CASSETTE	RSN_HUM:NM_012485;RSN_HUM:NM_001142556	0.635085	0.00207453	0.055804	0.00291198	0.00291198	0.579281
CSNK2A1	1457	3	LCASSETTE	RSN_HUM:NM_177560;RSN_HUM:NM_177559	0.229394	0.00346914	0.807544	0.0192813	0.0192813	0.57815
RSRC2	65117	2	CASSETTE	RSN_HUM:NM_023012,RSN_HUM:XM_005253601,RSN_HUM:XM_005253606;RSN_HUM:NR_036434	0.902849	0.00269717	0.325826	0.0080977	0.0080977	0.577023
CD44	960	2	XCASSETTE	RSN_HUM:NM_001001390;RSN_HUM:NM_000610	0.705235	0.000548044	0.12852	0.00322828	0.00322828	0.576715
CD44	960	20	XCASSETTE	RSN_HUM:NM_001001390;RSN_HUM:XM_005253231	0.703068	0.000549733	0.127439	0.00325566	0.00325566	0.575629
UBE3A	7337	15	CASSETTE	RSN_HUM:NM_130839;RSN_HUM:XM_005268270	0.913045	0.00141866	0.33776	0.00091337	0.00141866	0.575285
LRRFIP1	9208	33	CASSETTE	RSN_HUM:XM_005246115;RSN_HUM:XM_005246137,RSN_HUM:XM_005246139,RSN_HUM:XM_005246140,RSN_HUM:XM_005246138,RSN_HUM:XM_005246112,RSN_HUM:XM_005246114,RSN_HUM:XM_005246117,RSN_HUM:XM_005246123,RSN_HUM:XM_005246127,RSN_HUM:XM_005246113	0.988711	0.000416324	0.414428	0.0012063	0.0012063	0.574283
CLDND1	56650	1	CASSETTE	RSN_HUM:NM_001040181;RSN_HUM:NM_001040182	0.777898	0.00169662	0.20455	0.0022591	0.0022591	0.573348
TPP2	7174	1	CASSETTE	RSN_HUM:NM_003291,RSN_HUM:XM_005254071;RSN_HUM:XM_005254070,RSN_HUM:XM_005254072,RSN_HUM:XM_005254073	0.874244	0.00292173	0.301969	0.00142995	0.00292173	0.572275
C8orf59	401466	6	CASSETTE	RSN_HUM:NM_001099673;RSN_HUM:NM_001099672	0.855119	0.00541506	0.285653	0.00368454	0.00541506	0.569466
GOLGA4	2803	6	CASSETTE	RSN_HUM:NM_001172713,RSN_HUM:XM_005265073,RSN_HUM:XM_005265074;RSN_HUM:XM_005265071,RSN_HUM:XM_005265069,RSN_HUM:XM_005265070,RSN_HUM:XM_005265072	0.924307	0.00192025	0.355802	0.00094575	0.00192025	0.568505
CD44	960	22	XCASSETTE	RSN_HUM:NM_001001390;RSN_HUM:XM_005253233	0.703071	0.000549731	0.134772	0.00307853	0.00307853	0.568299
UBE3A	7337	6	XCASSETTE	RSN_HUM:XM_005268271;RSN_HUM:XM_005268268	0.679409	0.00138988	0.112018	0.000861471	0.00138988	0.567391
VPS29	51699	17	MUT_EXCLU	RSN_HUM:NR_104100;RSN_HUM:NR_104101	0.131164	0.000952713	0.696836	0.00165113	0.00165113	0.565672
TP53I3	9540	1	CASSETTE	RSN_HUM:NM_001206802;RSN_HUM:NM_004881,RSN_HUM:NM_147184,RSN_HUM:XM_005264650	0.0749443	0.00411105	0.640081	0.0132856	0.0132856	0.565137
INCENP	3619	1	CASSETTE	RSN_HUM:NM_020238;RSN_HUM:NM_001040694	0.647069	0.00200195	0.0819817	0.00152595	0.00200195	0.565087
CLDND1	56650	5	CASSETTE	RSN_HUM:NM_001040181;RSN_HUM:NM_019895	0.729948	0.00180807	0.165594	0.00279056	0.00279056	0.564354
CREM	1390	4	CASSETTE	RSN_HUM:NM_001267562,RSN_HUM:NM_001881,RSN_HUM:NR_051975;RSN_HUM:NM_183013	0.927139	0.000822876	0.364792	0.00114811	0.00114811	0.562347
FIP1L1	81608	4	CASSETTE	RSN_HUM:XM_005265772,RSN_HUM:XM_005265776,RSN_HUM:XM_005265780,RSN_HUM:XM_005265773,RSN_HUM:XM_005265774,RSN_HUM:XM_005265781,RSN_HUM:XM_005265782,RSN_HUM:NM_001134938;RSN_HUM:XM_005265768,RSN_HUM:XM_005265778,RSN_HUM:XM_005265770,RSN_HUM:XM_005265771,RSN_HUM:XM_005265775,RSN_HUM:XM_005265777,RSN_HUM:XM_005265779,RSN_HUM:XM_005265769,RSN_HUM:NM_001134937,RSN_HUM:NM_030917	0.571358	0.0041618	0.0113584	0.00168158	0.0041618	0.56
PPIP5K2	23262	1	CASSETTE	RSN_HUM:NM_001276277,RSN_HUM:NM_015216;RSN_HUM:NM_001281471	0.926577	0.00241893	0.367009	0.0009433	0.00241893	0.559568
NT5C2	22978	8	CASSETTE	RSN_HUM:NM_001134373,RSN_HUM:NM_012229,RSN_HUM:XM_005269632,RSN_HUM:XM_005269633,RSN_HUM:XM_005269634,RSN_HUM:XM_005269635,RSN_HUM:XM_005269636,RSN_HUM:XM_005269637,RSN_HUM:XM_005269638,RSN_HUM:XM_005269639;RSN_HUM:XM_005269640,RSN_HUM:XM_005269641,RSN_HUM:XM_005269642,RSN_HUM:XM_005269644,RSN_HUM:XM_005269645	0.888236	0.0024982	0.32944	0.00179675	0.0024982	0.558796
ORC3	23595	6	CASSETTE	RSN_HUM:NM_012381,RSN_HUM:NM_181837,RSN_HUM:XM_005248704;RSN_HUM:XM_005248706	0.916253	0.00234397	0.35949	0.000524076	0.00234397	0.556763
STAG2	10735	18	CASSETTE	RSN_HUM:NM_006603,RSN_HUM:XM_005262359;RSN_HUM:NM_001042750,RSN_HUM:NM_001042751	0.885471	0.00144324	0.329458	0.0012415	0.00144324	0.556013
ZNF706	51123	1	CASSETTE	RSN_HUM:NM_001042510;RSN_HUM:NM_001267708	0.779393	0.00019605	0.22475	0.0011119	0.0011119	0.554643
YTHDF3	253943	3	CASSETTE	RSN_HUM:NM_152758,RSN_HUM:NR_102434,RSN_HUM:NM_001277817,RSN_HUM:NM_001277818;RSN_HUM:NM_001277813,RSN_HUM:NM_001277814	0.914431	0.00152953	0.359857	0.00286836	0.00286836	0.554574
SAP30L	79685	4	CASSETTE	RSN_HUM:NM_024632;RSN_HUM:NR_024084	0.816922	0.0028496	0.263478	0.00166655	0.0028496	0.553444
RBM15	64783	1	CASSETTE	RSN_HUM:NM_001201545;RSN_HUM:NM_022768	0.674277	0.0001314	0.12108	0.0010778	0.0010778	0.553197
SEC31A	22872	9	CASSETTE	RSN_HUM:NM_001077207,RSN_HUM:NM_014933,RSN_HUM:NM_016211;RSN_HUM:XM_005262847,RSN_HUM:XM_005262851	0.909185	0.00357837	0.356038	0.00340834	0.00357837	0.553147
ANKRD12	23253	1	CASSETTE	RSN_HUM:NM_001083625,RSN_HUM:NM_001204056;RSN_HUM:NM_015208,RSN_HUM:XM_005258093,RSN_HUM:XM_005258092,RSN_HUM:XM_005258094	0.599674	0.000825228	0.0515038	0.00208334	0.00208334	0.54817
ANKRD12	23253	9	CASSETTE	RSN_HUM:XM_005258096;RSN_HUM:XM_005258095	0.599674	0.000825228	0.0515038	0.00208334	0.00208334	0.54817
COL4A3BP	10087	1	CASSETTE	RSN_HUM:NM_031361;RSN_HUM:NM_001130105,RSN_HUM:NM_005713	0.732954	0.0018113	0.185437	0.00234365	0.00234365	0.547517
RRNAD1	51093	5	INTERNAL5	RSN_HUM:NM_015997,RSN_HUM:XM_005245234,RSN_HUM:XM_005245235;RSN_HUM:XM_005245236	0.660841	0.000333767	0.1149	0.00337657	0.00337657	0.545941
CLDN12	9069	3	INTERNAL5	RSN_HUM:NM_001185073;RSN_HUM:NM_012129	0.140886	0.0010725	0.685437	5.15e-05	0.0010725	0.544551
CAPRIN2	65981	3	CASSETTE	RSN_HUM:NR_038177;RSN_HUM:NM_001002259,RSN_HUM:NM_023925,RSN_HUM:NM_001206856,RSN_HUM:NM_032156	0.728677	0.0011455	0.18617	0.0026594	0.0026594	0.542507
MTMR3	8897	5	CASSETTE	RSN_HUM:XM_005261805,RSN_HUM:XM_005261808;RSN_HUM:XM_005261804,RSN_HUM:XM_005261803,RSN_HUM:XM_005261806,RSN_HUM:XM_005261807,RSN_HUM:XM_005261809	0.595421	0.00108545	0.055225	0.00290086	0.00290086	0.540196
MTMR3	8897	7	CASSETTE	RSN_HUM:NM_021090,RSN_HUM:NM_153051;RSN_HUM:NM_153050	0.595421	0.00108545	0.055225	0.00290086	0.00290086	0.540196
UBP1	7342	1	CASSETTE	RSN_HUM:NM_001128160;RSN_HUM:NM_001128161,RSN_HUM:NM_014517	0.619338	0.0053822	0.082435	0.00146418	0.0053822	0.536903
UBE3A	7337	13	XCASSETTE	RSN_HUM:XM_005268271;RSN_HUM:XM_005268270	0.644299	0.00146562	0.107471	0.00089792	0.00146562	0.536828
IP6K2	51447	17	MUT_EXCLU	RSN_HUM:NM_001146178;RSN_HUM:NR_027437	0.653523	0.00105139	0.117262	0.00203648	0.00203648	0.536261
IP6K2	51447	21	MUT_EXCLU	RSN_HUM:NM_001146179;RSN_HUM:NR_027438	0.653523	0.00105139	0.117262	0.00203648	0.00203648	0.536261
MAP4K3	8491	1	CASSETTE	RSN_HUM:NM_001270425;RSN_HUM:NM_003618	0.587029	0.0011117	0.0534904	0.00062815	0.0011117	0.533539
GFPT1	2673	1	CASSETTE	RSN_HUM:NM_002056;RSN_HUM:NM_001244710	0.980889	0.0053633	0.4492	0.0162044	0.0162044	0.531689
SIPA1L1	26037	1	CASSETTE	RSN_HUM:XM_005267519,RSN_HUM:NM_001284245,RSN_HUM:NM_001284246;RSN_HUM:XM_005267514,RSN_HUM:NM_015556,RSN_HUM:XM_005267516,RSN_HUM:NM_001284247	0.955029	0.00210915	0.424106	0.00073095	0.00210915	0.530923
MORF4L2	9643	16	CASSETTE	RSN_HUM:NM_001142421,RSN_HUM:NM_001142423;RSN_HUM:NM_001142424,RSN_HUM:NM_001142428	0.840939	0.0101311	0.313646	0.0149835	0.0149835	0.527293
FMR1	2332	1	CASSETTE	RSN_HUM:NM_001185076,RSN_HUM:NM_001185081,RSN_HUM:NM_001185082,RSN_HUM:NR_033700;RSN_HUM:NM_001185075,RSN_HUM:NM_002024,RSN_HUM:NR_033699	0.839477	0.00124229	0.314228	0.000703709	0.00124229	0.525249
TMEM70	54968	3	CASSETTE	RSN_HUM:NM_017866;RSN_HUM:NR_033334	0.76349	0.0024426	0.239968	0.0053257	0.0053257	0.523522
RFC5	5985	4	CASSETTE	RSN_HUM:NM_001206801,RSN_HUM:NM_007370;RSN_HUM:NM_181578	0.919253	0.00127865	0.395856	0.000379683	0.00127865	0.523397
NDUFAF6	137682	5	CASSETTE	RSN_HUM:XM_005250789,RSN_HUM:XM_005250792,RSN_HUM:XM_005250793;RSN_HUM:XM_005250790	0.688686	0.000804333	0.167809	0.00170213	0.00170213	0.520877
ZNF542P	147947	4	CASSETTE	RSN_HUM:NR_024056,RSN_HUM:NR_024057,RSN_HUM:NR_033418;RSN_HUM:NR_003127,RSN_HUM:NR_024055	0.963951	0.000756607	0.444206	0.00104373	0.00104373	0.519745
GIT1	28964	1	CASSETTE	RSN_HUM:NM_014030;RSN_HUM:NM_001085454	0.938078	0.002445	0.421895	0.0048505	0.0048505	0.516183
RBBP5	5929	6	INTERNAL5	RSN_HUM:NM_001193272,RSN_HUM:XM_005245400;RSN_HUM:NM_005057,RSN_HUM:XM_005245398	0.311142	0.0010079	0.827007	0.0034591	0.0034591	0.515865
NAV2	89797	2	CASSETTE	RSN_HUM:NM_001111018,RSN_HUM:NM_145117,RSN_HUM:NM_182964,RSN_HUM:NM_001111019,RSN_HUM:XM_005253214;RSN_HUM:NM_001244963	0.930416	0.00123088	0.4186	0.00095485	0.00123088	0.511816
TTPAL	79183	1	INTERNAL5	RSN_HUM:NM_001039199,RSN_HUM:NM_024331,RSN_HUM:XM_005260549;RSN_HUM:NM_001261839	0.906309	0.0011666	0.395452	0.0007872	0.0011666	0.510857
ACAP3	116983	1	CASSETTE	RSN_HUM:XM_005244714;RSN_HUM:NM_030649,RSN_HUM:XM_005244715,RSN_HUM:XM_005244716	0.737636	0.0082721	0.22776	0.0044683	0.0082721	0.509876
ATF2	1386	5	CASSETTE	RSN_HUM:NM_001256090,RSN_HUM:NM_001256091,RSN_HUM:NM_001256092,RSN_HUM:NM_001880,RSN_HUM:NR_045774,RSN_HUM:NM_001256093;RSN_HUM:NR_045768,RSN_HUM:NR_045770,RSN_HUM:NR_045771,RSN_HUM:NR_045772,RSN_HUM:NR_045773,RSN_HUM:NR_045769	0.963228	0.0022041	0.458203	0.00101131	0.0022041	0.505025
MEAF6	64769	8	CASSETTE	RSN_HUM:NM_001270875;RSN_HUM:NR_073091	0.889503	0.00452028	0.385242	0.00153073	0.00452028	0.504261
ALG13	79868	3	CASSETTE	RSN_HUM:NM_001039210,RSN_HUM:NM_018466,RSN_HUM:NM_001257235,RSN_HUM:NM_001257240,RSN_HUM:NM_001257241,RSN_HUM:NM_001257239;RSN_HUM:NM_001168385,RSN_HUM:NR_033125	0.897227	0.00126297	0.393207	0.000937019	0.00126297	0.50402
GCNT1	2650	4	CASSETTE	RSN_HUM:NM_001097633;RSN_HUM:NM_001490	0.538184	0.0019969	0.0346704	0.00039515	0.0019969	0.503514
FRS2	10818	2	CASSETTE	RSN_HUM:NM_001042555,RSN_HUM:NM_001278354,RSN_HUM:NM_001278355,RSN_HUM:NM_001278356;RSN_HUM:NM_001278351,RSN_HUM:NM_006654	0.861898	0.00108525	0.358396	0.000993316	0.00108525	0.503502
LRRC75A-AS1	125144	59	XCASSETTE	RSN_HUM:NR_045023;RSN_HUM:NR_027176	0.579753	0.000185251	0.0767386	0.00140477	0.00140477	0.503014
DAG1	1605	36	CASSETTE	RSN_HUM:NM_001177640;RSN_HUM:NM_001177634	0.700991	0.0003632	0.202701	0.00103305	0.00103305	0.49829
CD44	960	39	XCASSETTE	RSN_HUM:NM_001202555;RSN_HUM:XM_005253231	0.840229	0.00169942	0.342048	0.00610908	0.00610908	0.498181
CD44	960	4	XCASSETTE	RSN_HUM:NM_001202555;RSN_HUM:NM_000610	0.840763	0.00169834	0.343122	0.00608996	0.00608996	0.497641
EML4	27436	2	CASSETTE	RSN_HUM:NM_001145076,RSN_HUM:NM_019063;RSN_HUM:XM_005264267,RSN_HUM:XM_005264268	0.904956	0.00163793	0.407505	0.00051435	0.00163793	0.497451
FIP1L1	81608	10	CASSETTE	RSN_HUM:NM_001134937,RSN_HUM:NM_001134938;RSN_HUM:NM_030917	0.516125	0.0040434	0.0195324	0.0017663	0.0040434	0.496593
FIP1L1	81608	8	CASSETTE	RSN_HUM:XM_005265771,RSN_HUM:XM_005265776;RSN_HUM:XM_005265770,RSN_HUM:XM_005265772,RSN_HUM:XM_005265775,RSN_HUM:XM_005265777,RSN_HUM:XM_005265779,RSN_HUM:XM_005265780	0.516125	0.0040434	0.0195324	0.0017663	0.0040434	0.496593
RAPH1	65059	3	CASSETTE	RSN_HUM:NM_213589;RSN_HUM:XM_005246780	0.915119	0.00076012	0.422937	0.00193693	0.00193693	0.492182
E2F6	1876	7	CASSETTE	RSN_HUM:NM_001278275,RSN_HUM:NM_198256,RSN_HUM:NR_103490;RSN_HUM:XM_005246154,RSN_HUM:XM_005246155	0.853953	0.000415597	0.361813	0.00147406	0.00147406	0.49214
SBNO1	55206	3	CASSETTE	RSN_HUM:XM_005253572;RSN_HUM:XM_005253576	0.911164	0.00118683	0.419245	0.0015968	0.0015968	0.491919
CD44	960	41	XCASSETTE	RSN_HUM:NM_001202555;RSN_HUM:XM_005253233	0.8335	0.00171314	0.341593	0.00611723	0.00611723	0.491907
RSPH4A	345895	1	CASSETTE	RSN_HUM:NM_001161664;RSN_HUM:NM_001010892	0.357983	1.31291e-05	0.848996	0.00129989	0.00129989	0.491013
U2AF1	7307	3	CASSETTE	RSN_HUM:NM_006758;RSN_HUM:NM_001025204	0.849604	0.012233	0.359589	0.00827694	0.012233	0.490015
CD44	960	40	XCASSETTE	RSN_HUM:NM_001202555;RSN_HUM:XM_005253232	0.859694	0.00166094	0.369816	0.00565038	0.00565038	0.489878
CPEB4	80315	3	LCASSETTE	RSN_HUM:XM_005265996;RSN_HUM:NM_030627	0.652099	0.000254563	0.163478	0.0030677	0.0030677	0.488621
ENKUR	219670	5	CASSETTE	RSN_HUM:NR_072993;RSN_HUM:NM_001270383,RSN_HUM:NM_145010	1	1.42e-05	0.511622	0.00439035	0.00439035	0.488378
PEAK1	79834	3	CASSETTE	RSN_HUM:NM_024776;RSN_HUM:XM_005254671,RSN_HUM:XM_005254674	0.614027	0.0011107	0.126809	0.000849312	0.0011107	0.487218
MEF2A	4205	2	CASSETTE	RSN_HUM:NM_001130926,RSN_HUM:NM_001171894,RSN_HUM:NM_005587,RSN_HUM:XM_005254914,RSN_HUM:XM_005254915,RSN_HUM:NM_001130928;RSN_HUM:NM_001130927	0.98445	0.0017106	0.497618	0.00414027	0.00414027	0.486832
INSR	3643	1	CASSETTE	RSN_HUM:NM_001079817;RSN_HUM:NM_000208,RSN_HUM:XM_005259554	0.771202	0.00106535	0.284644	0.000534	0.00106535	0.486558
2007-03-01	64844	1	LCASSETTE	RSN_HUM:NM_001282806,RSN_HUM:NM_022826;RSN_HUM:NM_001282805	0.820882	0.00128429	0.334478	0.00126316	0.00128429	0.486404
SUCO	51430	3	CASSETTE	RSN_HUM:NM_016227;RSN_HUM:XM_005245251,RSN_HUM:NM_001282750,RSN_HUM:NM_001282751,RSN_HUM:NM_014283	0.621809	0.00146106	0.136018	0.00307754	0.00307754	0.485791
SPPL2A	84888	1	CASSETTE	RSN_HUM:NM_032802,RSN_HUM:XM_005254724;RSN_HUM:XM_005254722,RSN_HUM:XM_005254723	0.859744	0.0055584	0.374263	0.00688487	0.00688487	0.485481
UBE2O	63893	2	INTERNAL5	RSN_HUM:NM_022066,RSN_HUM:XM_005257567;RSN_HUM:XM_005257568	0.821357	0.0009018	0.336623	0.0013576	0.0013576	0.484734
DDX42	11325	1	CASSETTE	RSN_HUM:NM_203499;RSN_HUM:NM_007372	0.813022	0.00508695	0.329532	0.00448576	0.00508695	0.48349
PDLIM5	10611	3	MUT_M_EXCLU	RSN_HUM:NM_001011513,RSN_HUM:XM_005262696;RSN_HUM:NM_001011516	0.987585	0.00107689	0.504921	0.000711604	0.00107689	0.482664
CD44	960	42	XCASSETTE	RSN_HUM:NM_001202555;RSN_HUM:XM_005253234	0.855126	0.00166981	0.373126	0.00560025	0.00560025	0.482
CD44	960	45	XCASSETTE	RSN_HUM:NM_001202555;RSN_HUM:XM_005253239	0.830942	0.00171841	0.351179	0.00595023	0.00595023	0.479763
NDUFAF6	137682	3	CASSETTE	RSN_HUM:NM_152416,RSN_HUM:XM_005250790,RSN_HUM:XM_005250789;RSN_HUM:XM_005250792,RSN_HUM:XM_005250791	0.937026	0.00130901	0.460464	0.00169937	0.00169937	0.476562
FAM104A	84923	4	CASSETTE	RSN_HUM:NM_032837;RSN_HUM:NM_001098832,RSN_HUM:NM_001289412	0.625448	0.00160405	0.152815	0.00197363	0.00197363	0.472633
PACRGL	133015	10	CASSETTE	RSN_HUM:NM_001130727,RSN_HUM:NM_145048;RSN_HUM:NR_047661,RSN_HUM:NM_001258345	0.768629	0.00124729	0.296764	0.00134871	0.00134871	0.471865
YPEL5	51646	4	CASSETTE	RSN_HUM:NM_001127400;RSN_HUM:NM_001127401	0.755217	0.00046	0.283493	0.0021027	0.0021027	0.471724
TNIP3	79931	2	CASSETTE	RSN_HUM:NM_001128843,RSN_HUM:NM_001244764;RSN_HUM:NM_024873	0.879529	0.00106125	0.408163	2.45e-05	0.00106125	0.471366
VPS29	51699	13	MUT_EXCLU	RSN_HUM:NM_057180;RSN_HUM:NR_104100	0.947162	0.00236502	0.475839	0.00219506	0.00236502	0.471323
BCOR	54880	1	CASSETTE	RSN_HUM:NM_001123384;RSN_HUM:NM_001123383,RSN_HUM:NM_001123385,RSN_HUM:NM_017745	0.621675	0.00140025	0.151439	0.0010704	0.00140025	0.470236
STX3	6809	1	CASSETTE	RSN_HUM:NM_001178040;RSN_HUM:NM_004177	0.341072	0.000528334	0.810725	0.00230621	0.00230621	0.469653
LRRFIP2	9209	12	XCASSETTE	RSN_HUM:NM_001134369,RSN_HUM:NM_017724,RSN_HUM:XM_005265553,RSN_HUM:XM_005265554,RSN_HUM:XM_005265555,RSN_HUM:XM_005265556,RSN_HUM:XM_005265557;RSN_HUM:XM_005265551	0.975087	0.00508886	0.505608	0.0020015	0.00508886	0.469479
LRRFIP2	9209	6	XCASSETTE	RSN_HUM:NM_001134369,RSN_HUM:NM_017724,RSN_HUM:XM_005265553,RSN_HUM:XM_005265554,RSN_HUM:XM_005265555,RSN_HUM:XM_005265556,RSN_HUM:XM_005265557;RSN_HUM:NM_006309,RSN_HUM:XM_005265538,RSN_HUM:XM_005265539,RSN_HUM:XM_005265540	0.996953	0.00497725	0.530898	0.00190616	0.00497725	0.466055
CHCHD7	79145	4	CASSETTE	RSN_HUM:NM_001011670,RSN_HUM:NM_001011671;RSN_HUM:NM_001011669,RSN_HUM:NM_024300	0.631678	0.000925706	0.167106	0.00307023	0.00307023	0.464572
KIF13A	63971	1	CASSETTE	RSN_HUM:NM_001105568;RSN_HUM:XM_005249290	0.9311	0.00332585	0.467213	0.00292115	0.00332585	0.463887
KIF13A	63971	8	CASSETTE	RSN_HUM:NM_001105566,RSN_HUM:NM_001105567,RSN_HUM:XM_005249293;RSN_HUM:NM_022113,RSN_HUM:XM_005249289,RSN_HUM:XM_005249291	0.9311	0.00332585	0.467213	0.00292115	0.00332585	0.463887
RAB11FIP5	26056	4	INTERNAL3	RSN_HUM:XM_005264251;RSN_HUM:XM_005264252	0.869748	0.00273815	0.406255	0.00172675	0.00273815	0.463493
NRG1	3084	9	MUT_M_EXCLU	RSN_HUM:NM_001159995,RSN_HUM:NM_001159999,RSN_HUM:NM_001160001,RSN_HUM:NM_013956;RSN_HUM:NM_013960,RSN_HUM:NM_013964,RSN_HUM:NM_001159996	0.308247	0.00347728	0.771138	0.00067285	0.00347728	0.462891
VEZT	55591	1	CASSETTE	RSN_HUM:NM_017599;RSN_HUM:NR_038241	0.587568	0.00267558	0.124859	0.00172007	0.00267558	0.462709
E2F6	1876	1	CASSETTE	RSN_HUM:NM_001278275,RSN_HUM:NM_198256,RSN_HUM:NR_103490;RSN_HUM:NM_001278276,RSN_HUM:NM_001278277	0.772357	0.000459503	0.310169	0.00171949	0.00171949	0.462188
ITGB3BP	23421	2	CASSETTE	RSN_HUM:NM_001206739,RSN_HUM:NM_014288;RSN_HUM:NR_045147	0.603122	0.0013518	0.142649	0.00106275	0.0013518	0.460473
NADK2	133686	3	CASSETTE	RSN_HUM:NM_001085411,RSN_HUM:NM_001287340,RSN_HUM:NM_153013;RSN_HUM:NM_001287341,RSN_HUM:XM_005248241	0.871122	0.00191305	0.410761	0.000381	0.00191305	0.460361
TPD52L2	7165	20	CASSETTE	RSN_HUM:NM_199362,RSN_HUM:NM_199363;RSN_HUM:NM_199360,RSN_HUM:NM_199361	0.443328	4.4775e-05	0.902541	0.0013067	0.0013067	0.459213
CHCHD7	79145	3	CASSETTE	RSN_HUM:NM_001011670,RSN_HUM:NM_001011671;RSN_HUM:NM_001011667,RSN_HUM:NM_001011668	0.612203	0.000955153	0.154908	0.00331199	0.00331199	0.457295
PAPD5	64282	1	INTERNAL3	RSN_HUM:NM_001040284,RSN_HUM:XM_005256092,RSN_HUM:XM_005256093;RSN_HUM:NM_001040285	0.651142	0.0012604	0.194144	0.0040949	0.0040949	0.456998
PBRM1	55193	4	CASSETTE	RSN_HUM:NM_018313,RSN_HUM:XM_005265288;RSN_HUM:XM_005265275,RSN_HUM:XM_005265279,RSN_HUM:XM_005265280,RSN_HUM:XM_005265282,RSN_HUM:XM_005265283	0.951601	0.00236573	0.496022	0.00126305	0.00236573	0.455579
LATS1	9113	2	CASSETTE	RSN_HUM:NM_004690,RSN_HUM:NM_001270519;RSN_HUM:NR_073033	0.905956	0.0009453	0.451896	0.0011496	0.0011496	0.45406
UGCG	7357	1	CASSETTE	RSN_HUM:NM_003358;RSN_HUM:XM_005252186	0.979136	0.00528425	0.525537	0.0066688	0.0066688	0.453599
LRRC75A-AS1	125144	19	LCASSETTE	RSN_HUM:NR_027172,RSN_HUM:NR_027175,RSN_HUM:NR_045025,RSN_HUM:NR_027171;RSN_HUM:NR_027173	0.567162	0.000372116	0.113943	0.00508655	0.00508655	0.453219
ANKRD11	29123	4	CASSETTE	RSN_HUM:NM_001256182,RSN_HUM:NM_001256183,RSN_HUM:NM_013275;RSN_HUM:NR_045839	0.811245	0.00388233	0.359563	0.0041141	0.0041141	0.451682
LRRC42	115353	1	CASSETTE	RSN_HUM:NM_052940;RSN_HUM:NM_001256409	0.536565	0.00237902	0.0849069	0.0007573	0.00237902	0.451658
N4BP2L2	10443	13	CASSETTE	RSN_HUM:XM_005266223;RSN_HUM:XM_005266219	0.0854648	0.00222275	0.535537	0.000365801	0.00222275	0.450072
LRRC75A-AS1	125144	22	LCASSETTE	RSN_HUM:NR_027172,RSN_HUM:NR_027175,RSN_HUM:NR_045025,RSN_HUM:NR_027171;RSN_HUM:NR_027177	0.538927	0.000391611	0.0896949	0.00646164	0.00646164	0.449232
NRG1	3084	5	CASSETTE	RSN_HUM:NM_001160004,RSN_HUM:NM_001160008,RSN_HUM:NM_013957;RSN_HUM:NM_001159995,RSN_HUM:NM_001159999,RSN_HUM:NM_001160001,RSN_HUM:NM_013956	0.461208	0.00143959	0.0124219	0.000434716	0.00143959	0.448786
C1orf52	148423	1	CASSETTE	RSN_HUM:NM_198077;RSN_HUM:NR_024113	0.576447	0.00149259	0.127737	0.00689618	0.00689618	0.44871
ARPP19	10776	3	CASSETTE	RSN_HUM:XM_005254135;RSN_HUM:XM_005254133,RSN_HUM:XM_005254134	0.957461	0.00304665	0.509955	0.00731116	0.00731116	0.447506
E2F6	1876	11	XCASSETTE	RSN_HUM:NM_001278278;RSN_HUM:NM_001278277	0.551912	0.000225398	0.105386	0.00124685	0.00124685	0.446526
LRRC75A-AS1	125144	23	LCASSETTE	RSN_HUM:NR_027172,RSN_HUM:NR_027175,RSN_HUM:NR_045025,RSN_HUM:NR_027171;RSN_HUM:NR_027178	0.558344	0.000377993	0.112509	0.00515136	0.00515136	0.445835
MYO6	4646	6	LCASSETTE	RSN_HUM:XM_005248725,RSN_HUM:XM_005248726;RSN_HUM:XM_005248722,RSN_HUM:NM_004999	0.952276	0.00140771	0.50688	0.000609809	0.00140771	0.445396
ZDHHC7	55625	1	CASSETTE	RSN_HUM:NM_017740;RSN_HUM:NM_001145548	0.512406	0.004772	0.0670299	0.00742654	0.00742654	0.445376
TOM1L1	10040	2	CASSETTE	RSN_HUM:NM_005486;RSN_HUM:XM_005256914,RSN_HUM:XM_005256915	0.868659	0.00111028	0.423433	0.000417776	0.00111028	0.445226
G3BP2	9908	2	CASSETTE	RSN_HUM:NM_203504;RSN_HUM:NM_012297,RSN_HUM:NM_203505,RSN_HUM:XM_005263382,RSN_HUM:XM_005263383,RSN_HUM:XM_005263384,RSN_HUM:XM_005263385,RSN_HUM:XM_005263386	0.86635	0.0084564	0.421179	0.011356	0.011356	0.445171
NUDT2	318	6	CASSETTE	RSN_HUM:NM_147173;RSN_HUM:NM_147172	0.767643	0.00105817	0.323015	0.000456326	0.00105817	0.444628
PPFIBP1	8496	5	CASSETTE	RSN_HUM:NM_001198915,RSN_HUM:NM_001198916,RSN_HUM:NM_177444,RSN_HUM:XM_005253510,RSN_HUM:XM_005253511;RSN_HUM:NM_003622,RSN_HUM:XM_005253505,RSN_HUM:XM_005253507,RSN_HUM:XM_005253508,RSN_HUM:XM_005253509,RSN_HUM:XM_005253514,RSN_HUM:XM_005253515,RSN_HUM:XM_005253516,RSN_HUM:XM_005253506	0.512774	0.0049751	0.068503	0.0047341	0.0049751	0.444271
WASF1	8936	4	LCASSETTE	RSN_HUM:NM_001024934,RSN_HUM:XM_005267206;RSN_HUM:XM_005267203	0.749869	0.00053436	0.307853	0.00202938	0.00202938	0.442016
CNNM4	26504	1	CASSETTE	RSN_HUM:NM_020184,RSN_HUM:XM_005263915;RSN_HUM:XM_005263914	1	0.00035105	0.560528	0.00110815	0.00110815	0.439472
ASAP2	8853	1	CASSETTE	RSN_HUM:NM_001135191;RSN_HUM:NM_003887	0.553122	0.00197298	0.114472	0.00161524	0.00197298	0.43865
LRRC75A-AS1	125144	20	LCASSETTE	RSN_HUM:NR_027172,RSN_HUM:NR_027175,RSN_HUM:NR_045025,RSN_HUM:NR_027171;RSN_HUM:NR_027174	0.526304	0.000401004	0.0883636	0.00655899	0.00655899	0.43794
BCL2L11	10018	69	MUT_M_EXCLU	RSN_HUM:NM_001204111;RSN_HUM:NM_138625	0.170024	2.1947e-05	0.60796	0.0011073	0.0011073	0.437936
CCP110	9738	2	CASSETTE	RSN_HUM:NM_014711,RSN_HUM:XM_005255721;RSN_HUM:NM_001199022,RSN_HUM:XM_005255719	0.46849	0.00105125	0.0309081	0.0014074	0.0014074	0.437582
ACAP3	116983	2	CASSETTE	RSN_HUM:XM_005244715;RSN_HUM:NM_030649,RSN_HUM:XM_005244714,RSN_HUM:XM_005244716,RSN_HUM:XM_005244717	0.749223	0.00839016	0.312876	0.0037069	0.00839016	0.436347
FAM13B	51306	1	CASSETTE	RSN_HUM:NM_001101800,RSN_HUM:NM_016603;RSN_HUM:NM_001101801	0.503665	0.00167135	0.0674074	0.00189	0.00189	0.436258
NCOR1	9611	6	CASSETTE	RSN_HUM:NM_001190440,RSN_HUM:NM_006311,RSN_HUM:XM_005256871,RSN_HUM:XM_005256872,RSN_HUM:NM_001190438;RSN_HUM:XM_005256875,RSN_HUM:XM_005256866,RSN_HUM:XM_005256867,RSN_HUM:XM_005256868,RSN_HUM:XM_005256873,RSN_HUM:XM_005256874	0.664975	0.00271406	0.228881	0.00226275	0.00271406	0.436094
LRRFIP1	9208	42	XCASSETTE	RSN_HUM:XM_005246134,RSN_HUM:XM_005246136,RSN_HUM:XM_005246142,RSN_HUM:XM_005246132,RSN_HUM:XM_005246141,RSN_HUM:XM_005246133,RSN_HUM:XM_005246135,RSN_HUM:NM_001137551,RSN_HUM:NM_001137553;RSN_HUM:XM_005246114	0.95759	0.00309083	0.521921	0.00378084	0.00378084	0.435669
CD44	960	18	LCASSETTE	RSN_HUM:NM_001202555;RSN_HUM:NM_001001390	0.698701	0.00204365	0.263132	0.00794127	0.00794127	0.435569
CD44	960	44	XCASSETTE	RSN_HUM:NM_001202555;RSN_HUM:XM_005253238	0.665912	0.00214428	0.231961	0.00900842	0.00900842	0.433951
RABL2B	11158	2	CASSETTE	RSN_HUM:NM_001003789,RSN_HUM:NM_001130922;RSN_HUM:NM_001130920,RSN_HUM:NM_001130923	0.934805	0.000699825	0.50145	0.00100336	0.00100336	0.433355
ZC2HC1A	51101	1	CASSETTE	RSN_HUM:NM_016010;RSN_HUM:XM_005251256	0.944961	0.00106788	0.511655	0.000217725	0.00106788	0.433306
LRRFIP1	9208	21	XCASSETTE	RSN_HUM:XM_005246134,RSN_HUM:XM_005246136,RSN_HUM:XM_005246142,RSN_HUM:XM_005246132,RSN_HUM:XM_005246141,RSN_HUM:XM_005246133,RSN_HUM:XM_005246135,RSN_HUM:NM_001137551,RSN_HUM:NM_001137553;RSN_HUM:XM_005246128,RSN_HUM:XM_005246125	0.945352	0.00313084	0.514815	0.00383303	0.00383303	0.430537
LRRFIP1	9208	50	XCASSETTE	RSN_HUM:XM_005246134,RSN_HUM:XM_005246136,RSN_HUM:XM_005246142,RSN_HUM:XM_005246132,RSN_HUM:XM_005246141,RSN_HUM:XM_005246133,RSN_HUM:XM_005246135,RSN_HUM:NM_001137551,RSN_HUM:NM_001137553;RSN_HUM:XM_005246130	0.877708	0.00337213	0.447214	0.00441243	0.00441243	0.430494
RAB18	22931	1	CASSETTE	RSN_HUM:NM_001256411,RSN_HUM:NM_021252;RSN_HUM:NM_001256410	0.990506	0.00798929	0.560397	0.0160313	0.0160313	0.430109
CTDP1	9150	1	CASSETTE	RSN_HUM:NM_048368;RSN_HUM:NM_004715,RSN_HUM:NM_001202504	0.327342	0.00116911	0.757249	0.000952131	0.00116911	0.429907
SRRM1	10250	1	CASSETTE	RSN_HUM:NM_005839,RSN_HUM:XM_005245721;RSN_HUM:XM_005245717,RSN_HUM:XM_005245718,RSN_HUM:XM_005245719,RSN_HUM:XM_005245720,RSN_HUM:XM_005245722	0.438177	0.00311221	0.00844457	0.00171708	0.00311221	0.429732
PLEKHB2	55041	13	CASSETTE	RSN_HUM:NM_001267064,RSN_HUM:NM_001267068,RSN_HUM:NM_017958,RSN_HUM:NR_049791;RSN_HUM:NM_001267063	0.924433	0.00455436	0.495015	0.0112348	0.0112348	0.429418
PLEKHB2	55041	1	CASSETTE	RSN_HUM:NM_001100623,RSN_HUM:NM_001267065,RSN_HUM:NM_001267067,RSN_HUM:NR_049789,RSN_HUM:NR_049790,RSN_HUM:NR_049792;RSN_HUM:NM_001267062	0.924433	0.00455436	0.495015	0.0112348	0.0112348	0.429418
CD44	960	43	XCASSETTE	RSN_HUM:NM_001202555;RSN_HUM:XM_005253235	0.74608	0.00191387	0.318572	0.00655927	0.00655927	0.427508
FXR1	8087	6	CASSETTE	RSN_HUM:XM_005247816;RSN_HUM:XM_005247814	0.562933	0.0083536	0.135886	0.00736903	0.0083536	0.427047
FXR1	8087	9	CASSETTE	RSN_HUM:NM_001013438;RSN_HUM:NM_001013439,RSN_HUM:NM_005087	0.562933	0.0083536	0.135886	0.00736903	0.0083536	0.427047
CD44	960	14	XCASSETTE	RSN_HUM:NM_001202555;RSN_HUM:NM_001001389	0.746291	0.00191333	0.319562	0.00653895	0.00653895	0.426729
KAT6A	7994	2	CASSETTE	RSN_HUM:NM_006766;RSN_HUM:NM_001099412	0.771528	0.0010894	0.345259	0.00109773	0.00109773	0.426269
SRSF3	6428	1	CASSETTE	RSN_HUM:NM_003017;RSN_HUM:NR_036610	0.911639	0.0220929	0.487637	0.0187533	0.0220929	0.424002
AKAP13	11214	3	CASSETTE	RSN_HUM:XM_005254842,RSN_HUM:XM_005254846,RSN_HUM:NM_007200,RSN_HUM:XM_005254854;RSN_HUM:XM_005254839,RSN_HUM:XM_005254840,RSN_HUM:XM_005254841,RSN_HUM:XM_005254844,RSN_HUM:XM_005254845,RSN_HUM:XM_005254849,RSN_HUM:XM_005254850,RSN_HUM:XM_005254852,RSN_HUM:XM_005254851,RSN_HUM:XM_005254853	0.711734	0.000903708	0.288563	0.0012363	0.0012363	0.423171
HMGN3	9324	4	INTERNAL5	RSN_HUM:NM_001201363;RSN_HUM:XM_005248769	0	0.0001857	0.423144	0.0016056	0.0016056	0.423144
SEC24B	10427	1	CASSETTE	RSN_HUM:NM_001042734,RSN_HUM:XM_005262691;RSN_HUM:NM_006323,RSN_HUM:XM_005262688,RSN_HUM:XM_005262689	0.75759	0.0021344	0.334464	0.00352465	0.00352465	0.423126
NRG1	3084	6	CASSETTE	RSN_HUM:NM_001159995,RSN_HUM:NM_001159999,RSN_HUM:NM_001160001,RSN_HUM:NM_013956,RSN_HUM:NM_013957,RSN_HUM:NM_013964;RSN_HUM:NM_001160004,RSN_HUM:NM_013960,RSN_HUM:NM_001159996	0.678995	0.00413947	0.256641	0.000762935	0.00413947	0.422354
FRS2	10818	8	CASSETTE	RSN_HUM:NM_001278351,RSN_HUM:NM_006654;RSN_HUM:NM_001278353	0.895828	0.00018815	0.474843	0.0011488	0.0011488	0.420985
CTAGE5	4253	27	INTERNAL5	RSN_HUM:NM_001247989,RSN_HUM:NM_005930,RSN_HUM:NM_203355;RSN_HUM:NM_001247990	0.842527	0.000626776	0.421631	0.00132545	0.00132545	0.420896
NFATC3	4775	2	CASSETTE	RSN_HUM:NM_173165;RSN_HUM:NM_004555	0.691329	0.00100965	0.270958	0.0004008	0.00100965	0.420371
AHDC1	27245	7	CASSETTE	RSN_HUM:XM_005245852;RSN_HUM:XM_005245848,RSN_HUM:XM_005245850,RSN_HUM:XM_005245851,RSN_HUM:XM_005245853	0.418377	0.00112219	0.838721	0.000354111	0.00112219	0.420344
NUDT2	318	3	CASSETTE	RSN_HUM:NM_147173;RSN_HUM:NM_001161	0.731621	0.00111027	0.311546	0.000473124	0.00111027	0.420075
PNPLA8	50640	1	CASSETTE	RSN_HUM:NM_001256008,RSN_HUM:NM_001256009;RSN_HUM:NM_001256007	0.524172	0.000904284	0.104569	0.00186288	0.00186288	0.419603
RANBP2	5903	2	CASSETTE	RSN_HUM:XM_005264004,RSN_HUM:NM_006267;RSN_HUM:XM_005264002,RSN_HUM:XM_005264003,RSN_HUM:XM_005264005	0.988641	0.0034467	0.570376	0.0052681	0.0052681	0.418265
HMGN3	9324	3	INTERNAL5	RSN_HUM:NM_001201363;RSN_HUM:XM_005248768	0	4.49e-05	0.418247	0.0016244	0.0016244	0.418247
MARK2	2011	5	CASSETTE	RSN_HUM:NM_004954,RSN_HUM:NM_017490;RSN_HUM:NM_001039469	0.959949	0.00217097	0.541779	0.00320931	0.00320931	0.41817
VCPKMT	79609	7	INTERNAL5	RSN_HUM:NM_001040662,RSN_HUM:NM_024558;RSN_HUM:NR_049738	0.658878	0.000422233	0.240917	0.00122349	0.00122349	0.417961
DLGAP5	9787	1	CASSETTE	RSN_HUM:NM_014750;RSN_HUM:NM_001146015	0.838244	0.00529068	0.421425	0.0001839	0.00529068	0.416819
NT5C3A	51251	1	CASSETTE	RSN_HUM:NM_001002010;RSN_HUM:NM_001002009	0.579846	0.00265105	0.164678	0.00415538	0.00415538	0.415168
SOCS4	122809	1	CASSETTE	RSN_HUM:NM_080867;RSN_HUM:NM_199421	0.546658	0.000898185	0.131733	0.00180137	0.00180137	0.414925
PPFIA1	8500	2	CASSETTE	RSN_HUM:NM_003626,RSN_HUM:NM_177423;RSN_HUM:NR_045286	0.950513	0.00130551	0.535723	0.000730788	0.00130551	0.41479
NABP1	64859	1	CASSETTE	RSN_HUM:NM_001254736,RSN_HUM:NM_001031716;RSN_HUM:NR_045622,RSN_HUM:NR_045623	0.755597	0.0024208	0.34156	0.0007435	0.0024208	0.414037
CLIP1	6249	2	LCASSETTE	RSN_HUM:NM_198240;RSN_HUM:NM_001247997,RSN_HUM:XM_005253593,RSN_HUM:XM_005253594,RSN_HUM:XM_005253595	0.965595	0.0045453	0.551693	0.0044871	0.0045453	0.413902
MORF4L2	9643	21	CASSETTE	RSN_HUM:NM_001142425,RSN_HUM:NM_001142427;RSN_HUM:NM_001142429,RSN_HUM:NM_001142432	0.448764	0.00181331	0.0350962	0.00472843	0.00472843	0.413668
GPCPD1	56261	4	CASSETTE	RSN_HUM:XM_005260760;RSN_HUM:XM_005260761	0.120095	0.00051626	0.533647	0.00370563	0.00370563	0.413552
LRRFIP1	9208	49	XCASSETTE	RSN_HUM:XM_005246134,RSN_HUM:XM_005246136,RSN_HUM:XM_005246142,RSN_HUM:XM_005246132,RSN_HUM:XM_005246141,RSN_HUM:XM_005246133,RSN_HUM:XM_005246135,RSN_HUM:NM_001137551,RSN_HUM:NM_001137553;RSN_HUM:XM_005246126,RSN_HUM:XM_005246129,RSN_HUM:XM_005246131	0.936738	0.00315963	0.525004	0.00375864	0.00375864	0.411734
SLC35A2	7355	1	INTERNAL3	RSN_HUM:NM_001282647;RSN_HUM:NM_005660	0.259054	0.00274139	0.67044	0.00339817	0.00339817	0.411386
LRRFIP1	9208	46	XCASSETTE	RSN_HUM:XM_005246134,RSN_HUM:XM_005246136,RSN_HUM:XM_005246142,RSN_HUM:XM_005246132,RSN_HUM:XM_005246141,RSN_HUM:XM_005246133,RSN_HUM:XM_005246135,RSN_HUM:NM_001137551,RSN_HUM:NM_001137553;RSN_HUM:XM_005246120	0.949602	0.00311683	0.539878	0.00365508	0.00365508	0.409724
NDEL1	81565	3	CASSETTE	RSN_HUM:NM_030808;RSN_HUM:NM_001025579	0.638874	0.00508175	0.229197	0.0086694	0.0086694	0.409677
WASF1	8936	19	LCASSETTE	RSN_HUM:NM_001024936;RSN_HUM:NM_003931	0.786301	0.000813937	0.377054	0.0017711	0.0017711	0.409247
MBNL1	4154	19	CASSETTE	RSN_HUM:NM_021038,RSN_HUM:NM_207292,RSN_HUM:XM_005247464,RSN_HUM:XM_005247466,RSN_HUM:XM_005247471,RSN_HUM:NM_207293,RSN_HUM:NM_207294,RSN_HUM:NM_207295,RSN_HUM:NM_207296,RSN_HUM:NM_207297;RSN_HUM:XM_005247457,RSN_HUM:XM_005247461,RSN_HUM:XM_005247462,RSN_HUM:XM_005247463,RSN_HUM:XM_005247465,RSN_HUM:XM_005247467,RSN_HUM:XM_005247468,RSN_HUM:XM_005247460,RSN_HUM:XM_005247459,RSN_HUM:XM_005247458	0.995066	0.00874483	0.58742	0.00200252	0.00874483	0.407646
SETD5	55209	2	CASSETTE	RSN_HUM:XM_005265299,RSN_HUM:XM_005265301;RSN_HUM:XM_005265303	0.847585	0.000668313	0.440518	0.00130863	0.00130863	0.407067
PAXBP1	94104	1	INTERNAL5	RSN_HUM:NM_016631,RSN_HUM:NM_013329;RSN_HUM:NR_027873	0.544708	0.000633	0.951451	0.0012132	0.0012132	0.406743
USP47	55031	2	CASSETTE	RSN_HUM:NM_001282659;RSN_HUM:XM_005252997	0.958465	0.00131095	0.551992	0.00104295	0.00131095	0.406473
SMAD5	4090	3	CASSETTE	RSN_HUM:NM_001001420;RSN_HUM:NM_005903	0.448623	0.00176273	0.0435012	0.0017034	0.00176273	0.405122
SRPK2	6733	2	CASSETTE	RSN_HUM:XM_005250549,RSN_HUM:XM_005250550,RSN_HUM:NM_182692;RSN_HUM:XM_005250551	0.776083	0.00115417	0.372586	0.000779329	0.00115417	0.403497
CD46	4179	1	CASSETTE	RSN_HUM:NM_153826,RSN_HUM:NM_172351;RSN_HUM:NM_002389,RSN_HUM:NM_172359	0.926613	0.00488985	0.525145	0.0043687	0.00488985	0.401468
NT5C2	22978	10	MUT_EXCLU	RSN_HUM:NM_001134373,RSN_HUM:NM_012229,RSN_HUM:XM_005269632,RSN_HUM:XM_005269633,RSN_HUM:XM_005269634,RSN_HUM:XM_005269635,RSN_HUM:XM_005269636;RSN_HUM:XM_005269646	0.909023	0.0028857	0.508015	0.0018654	0.0028857	0.401008
GIGYF2	26058	6	CASSETTE	RSN_HUM:NM_001103146,RSN_HUM:NM_001103147,RSN_HUM:NR_103495;RSN_HUM:NM_015575,RSN_HUM:NR_103494	0.743783	0.00058915	0.342857	0.00109025	0.00109025	0.400926
BAIAP2	10458	15	CASSETTE	RSN_HUM:XM_005256943;RSN_HUM:XM_005256945	0.879838	0.00190618	0.480009	0.000584433	0.00190618	0.399829
BAIAP2	10458	7	CASSETTE	RSN_HUM:NM_001144888;RSN_HUM:NM_006340	0.879838	0.00190618	0.480009	0.000584433	0.00190618	0.399829
DEDD2	162989	5	CASSETTE	RSN_HUM:NR_073047;RSN_HUM:NM_001270614	0.130022	0.000446846	0.529662	0.00114885	0.00114885	0.39964
APTX	54840	6	INTERNAL3	RSN_HUM:NM_001195248,RSN_HUM:NM_001195249,RSN_HUM:NM_175073,RSN_HUM:NM_001195251,RSN_HUM:NM_175069;RSN_HUM:NR_036577	0.521803	0.0011627	0.123038	0.00152447	0.00152447	0.398765
POLK	51426	1	CASSETTE	RSN_HUM:NM_016218;RSN_HUM:XM_005248534,RSN_HUM:XM_005248536	0.956928	0.00174475	0.559075	0.0007355	0.00174475	0.397853
PACRGL	133015	11	CASSETTE	RSN_HUM:NR_047661;RSN_HUM:NM_001258345,RSN_HUM:NM_145048	0.587295	0.000978554	0.189496	0.00123749	0.00123749	0.397799
SPAG9	9043	2	CASSETTE	RSN_HUM:NM_001130527,RSN_HUM:NM_001251971,RSN_HUM:NM_003971,RSN_HUM:XM_005257770,RSN_HUM:XM_005257771,RSN_HUM:XM_005257773,RSN_HUM:XM_005257774;RSN_HUM:NM_001130528,RSN_HUM:XM_005257767,RSN_HUM:XM_005257768,RSN_HUM:XM_005257769,RSN_HUM:XM_005257772	0.717482	0.00394025	0.322251	0.00727331	0.00727331	0.395231
LRRFIP1	9208	31	XCASSETTE	RSN_HUM:XM_005246134,RSN_HUM:XM_005246136,RSN_HUM:XM_005246142,RSN_HUM:XM_005246132,RSN_HUM:XM_005246141,RSN_HUM:XM_005246133,RSN_HUM:XM_005246135,RSN_HUM:NM_001137551,RSN_HUM:NM_001137553;RSN_HUM:XM_005246137,RSN_HUM:XM_005246139,RSN_HUM:XM_005246140,RSN_HUM:XM_005246138,RSN_HUM:XM_005246112,RSN_HUM:XM_005246117,RSN_HUM:XM_005246123,RSN_HUM:XM_005246127,RSN_HUM:XM_005246113	0.962928	0.0030737	0.568125	0.00347335	0.00347335	0.394803
TCEB1	6921	12	CASSETTE	RSN_HUM:NM_005648;RSN_HUM:NM_001204858	0.788677	0.00452441	0.393919	0.00573798	0.00573798	0.394758
C8orf59	401466	3	CASSETTE	RSN_HUM:NM_001099673;RSN_HUM:NM_001099670	0.948754	0.00488063	0.554939	0.0018966	0.00488063	0.393815
ZNF655	79027	20	MUT_M_EXCLU	RSN_HUM:XM_005250577,RSN_HUM:XM_005250578;RSN_HUM:XM_005250583	0.800595	0.000578251	0.40713	0.00178877	0.00178877	0.393465
QRICH1	54870	1	CASSETTE	RSN_HUM:NM_198880;RSN_HUM:NM_017730	0.883015	0.00244605	0.489553	0.0008998	0.00244605	0.393462
TOM1L2	146691	2	CASSETTE	RSN_HUM:NM_001033551,RSN_HUM:NM_001082968,RSN_HUM:NM_001288787;RSN_HUM:NM_001288786,RSN_HUM:NM_001288789,RSN_HUM:XM_005256461,RSN_HUM:XM_005256462,RSN_HUM:XM_005256466	0.935106	0.0023238	0.542876	0.0030495	0.0030495	0.39223
LRRFIP1	9208	37	XCASSETTE	RSN_HUM:XM_005246126,RSN_HUM:XM_005246129,RSN_HUM:XM_005246131;RSN_HUM:XM_005246137,RSN_HUM:XM_005246139,RSN_HUM:XM_005246140,RSN_HUM:XM_005246138,RSN_HUM:XM_005246112,RSN_HUM:XM_005246114,RSN_HUM:XM_005246117,RSN_HUM:XM_005246123,RSN_HUM:XM_005246127,RSN_HUM:XM_005246113	0.937337	0.000591531	0.545165	0.00208176	0.00208176	0.392172
WASF1	8936	24	CASSETTE	RSN_HUM:NM_003931,RSN_HUM:XM_005267204;RSN_HUM:XM_005267203	0.891659	0.00035905	0.500242	0.00134345	0.00134345	0.391417
BCL2L11	10018	80	MUT_M_EXCLU	RSN_HUM:NM_001204112;RSN_HUM:NM_138625	0.181925	2.22663e-05	0.572758	0.00101607	0.00101607	0.390833
SNX21	90203	4	CASSETTE	RSN_HUM:NM_033421;RSN_HUM:NM_001042633	0.701095	0.00219585	0.310269	0.00327287	0.00327287	0.390826
EHBP1	23301	2	CASSETTE	RSN_HUM:NM_001142615,RSN_HUM:NM_001142616,RSN_HUM:XM_005264227,RSN_HUM:NM_001142614;RSN_HUM:XM_005264225,RSN_HUM:NM_015252,RSN_HUM:XM_005264228,RSN_HUM:XM_005264226	0.987346	0.00515645	0.597157	0.00163575	0.00515645	0.390189
UAP1	6675	2	CASSETTE	RSN_HUM:NM_003115;RSN_HUM:XM_005245465	0.435619	0.00798106	0.045585	0.00514424	0.00798106	0.390034
ERC1	23085	3	CASSETTE	RSN_HUM:NM_178039,RSN_HUM:NM_178040;RSN_HUM:NR_027949,RSN_HUM:NR_027946,RSN_HUM:NR_027948	0.951087	0.00228023	0.561172	0.000964766	0.00228023	0.389915
FBXL12	54850	2	CASSETTE	RSN_HUM:NM_017703,RSN_HUM:XM_005259964;RSN_HUM:XM_005259965,RSN_HUM:XM_005259966	0.89905	0.000894998	0.509146	0.00136267	0.00136267	0.389904
MEAF6	64769	7	LCASSETTE	RSN_HUM:NM_001270875;RSN_HUM:NR_073090	0.949182	0.00423607	0.560231	0.0010526	0.00423607	0.388951
REPS1	85021	1	CASSETTE	RSN_HUM:NM_001128617,RSN_HUM:NM_001286612,RSN_HUM:XM_005267179;RSN_HUM:NM_001286611,RSN_HUM:NM_031922,RSN_HUM:XM_005267178	0.640212	0.00207186	0.251637	0.00264985	0.00264985	0.388575
IL1R1	3554	7	CASSETTE	RSN_HUM:NM_001288706,RSN_HUM:XM_005263932,RSN_HUM:XM_005263929,RSN_HUM:XM_005263931,RSN_HUM:XM_005263930,RSN_HUM:NM_000877,RSN_HUM:XM_005263933;RSN_HUM:XM_005263934	0.916881	0.00236649	0.528428	0.000809526	0.00236649	0.388453
NUP50	10762	1	CASSETTE	RSN_HUM:NM_007172;RSN_HUM:XM_005261312,RSN_HUM:NM_153645,RSN_HUM:XM_005261313	0.936817	0.00198555	0.548962	0.00320423	0.00320423	0.387855
PRMT2	3275	7	CASSETTE	RSN_HUM:NM_001242864,RSN_HUM:NM_001242865,RSN_HUM:NM_001242866,RSN_HUM:NM_001286676,RSN_HUM:NM_001286677,RSN_HUM:NM_001286678,RSN_HUM:NM_001535;RSN_HUM:NM_206962	0.746484	0.00911704	0.359535	0.0093532	0.0093532	0.386949
LRRFIP1	9208	62	XCASSETTE	RSN_HUM:XM_005246130,RSN_HUM:NM_001137552,RSN_HUM:NM_004735;RSN_HUM:XM_005246114	0.950605	0.000932884	0.563766	0.00274536	0.00274536	0.386839
ABI1	10006	2	CASSETTE	RSN_HUM:NM_001012752,RSN_HUM:NM_001178121,RSN_HUM:NM_001178124,RSN_HUM:XM_005252332,RSN_HUM:XM_005252333;RSN_HUM:NM_001012750,RSN_HUM:NM_001012751,RSN_HUM:NM_001178116,RSN_HUM:NM_001178119,RSN_HUM:NM_001178120,RSN_HUM:NM_001178122,RSN_HUM:NM_001178123,RSN_HUM:NM_005470	0.834091	0.00921254	0.448132	0.00506012	0.00921254	0.385959
ZNF655	79027	18	LCASSETTE	RSN_HUM:NM_138494,RSN_HUM:NM_001009960;RSN_HUM:XM_005250583	0.493666	0.000936666	0.10825	0.00158291	0.00158291	0.385416
LIG1	3978	4	INTERNAL5	RSN_HUM:NM_000234,RSN_HUM:NM_001289063,RSN_HUM:NM_001289064,RSN_HUM:XM_005258934;RSN_HUM:NR_110296	0.958858	0.0015021	0.573805	0.0014064	0.0015021	0.385053
SMN2	6607	1	CASSETTE	RSN_HUM:NM_022875,RSN_HUM:NM_022877;RSN_HUM:NM_017411,RSN_HUM:NM_022876	0.406746	0.00313091	0.0219338	0.0037066	0.0037066	0.384812
LRRFIP1	9208	47	XCASSETTE	RSN_HUM:XM_005246134,RSN_HUM:XM_005246136,RSN_HUM:XM_005246142,RSN_HUM:XM_005246132,RSN_HUM:XM_005246141,RSN_HUM:XM_005246133,RSN_HUM:XM_005246135,RSN_HUM:NM_001137551,RSN_HUM:NM_001137553;RSN_HUM:XM_005246121,RSN_HUM:XM_005246124	0.95129	0.0031113	0.566847	0.00348119	0.00348119	0.384443
KANSL3	55683	7	CASSETTE	RSN_HUM:NM_001115016,RSN_HUM:NR_047653,RSN_HUM:NR_047654,RSN_HUM:NR_047655,RSN_HUM:NR_047656,RSN_HUM:NR_047657,RSN_HUM:XM_005263984,RSN_HUM:XM_005263987,RSN_HUM:XM_005263980,RSN_HUM:XM_005263981,RSN_HUM:XM_005263985,RSN_HUM:XM_005263988,RSN_HUM:XM_005263992,RSN_HUM:XM_005263982,RSN_HUM:XM_005263983,RSN_HUM:XM_005263986;RSN_HUM:NR_047658	0.984784	0.00166276	0.602034	0.00134748	0.00166276	0.38275
REPS1	85021	5	CASSETTE	RSN_HUM:NM_001128617,RSN_HUM:NM_001286612,RSN_HUM:XM_005267179;RSN_HUM:XM_005267177	0.748646	0.00177177	0.366805	0.00181786	0.00181786	0.381841
AXIN1	8312	1	CASSETTE	RSN_HUM:NM_181050,RSN_HUM:XM_005255608;RSN_HUM:NM_003502,RSN_HUM:XM_005255607,RSN_HUM:XM_005255609	0.782434	0.0010429	0.400817	0.0006851	0.0010429	0.381617
ADNP	23394	3	LCASSETTE	RSN_HUM:NM_181442;RSN_HUM:NM_001282531	0.392067	0.000652185	0.010709	0.00136334	0.00136334	0.381358
TBCK	93627	3	CASSETTE	RSN_HUM:NM_001163435,RSN_HUM:NM_001163436;RSN_HUM:NM_001290768	0.973536	0.00110907	0.592583	0.00015586	0.00110907	0.380953
FNIP2	57600	1	CASSETTE	RSN_HUM:NM_020840,RSN_HUM:XM_005263159;RSN_HUM:XM_005263158,RSN_HUM:XM_005263156,RSN_HUM:XM_005263160,RSN_HUM:XM_005263161	0.406759	0.00057405	0.0261249	0.0013512	0.0013512	0.380634
RRNAD1	51093	4	CASSETTE	RSN_HUM:NM_001142560,RSN_HUM:XM_005245237;RSN_HUM:XM_005245236	0.767207	0.000983956	0.386766	0.00357684	0.00357684	0.380441
ZBTB7B	51043	3	LCASSETTE	RSN_HUM:NR_049765;RSN_HUM:NR_045515	0.81758	0.00113783	0.437737	0.000676738	0.00113783	0.379843
ZBTB7B	51043	7	LCASSETTE	RSN_HUM:NM_001256455;RSN_HUM:NM_001252406	0.81758	0.00113783	0.437737	0.000676738	0.00113783	0.379843
LRRFIP1	9208	53	LCASSETTE	RSN_HUM:XM_005246134,RSN_HUM:XM_005246136,RSN_HUM:XM_005246142,RSN_HUM:XM_005246132,RSN_HUM:XM_005246141,RSN_HUM:XM_005246133,RSN_HUM:XM_005246135,RSN_HUM:NM_001137551,RSN_HUM:NM_001137553;RSN_HUM:NM_001137552,RSN_HUM:NM_004735	0.829376	0.00356865	0.450295	0.00438224	0.00438224	0.379081
TJAP1	93643	1	CASSETTE	RSN_HUM:NM_001146016,RSN_HUM:NM_001146019,RSN_HUM:NM_080604;RSN_HUM:NM_001146018	0.778644	0.000870827	0.400103	0.00113628	0.00113628	0.378541
LRRFIP1	9208	45	XCASSETTE	RSN_HUM:XM_005246134,RSN_HUM:XM_005246136,RSN_HUM:XM_005246142,RSN_HUM:XM_005246132,RSN_HUM:XM_005246141,RSN_HUM:XM_005246133,RSN_HUM:XM_005246135,RSN_HUM:NM_001137551,RSN_HUM:NM_001137553;RSN_HUM:XM_005246119	0.958851	0.00308677	0.580631	0.00339855	0.00339855	0.37822
MYO1B	4430	1	LCASSETTE	RSN_HUM:NM_012223,RSN_HUM:XM_005246577;RSN_HUM:NM_001130158,RSN_HUM:NM_001161819,RSN_HUM:XM_005246569,RSN_HUM:XM_005246572	0.638475	0.0106504	0.26044	0.00687568	0.0106504	0.378035
PREPL	9581	11	CASSETTE	RSN_HUM:NM_001171617;RSN_HUM:NM_001171603	0.508323	0.00101609	0.130513	0.000533281	0.00101609	0.37781
PREPL	9581	39	CASSETTE	RSN_HUM:XM_005264659;RSN_HUM:XM_005264654	0.508323	0.00101609	0.130513	0.000533281	0.00101609	0.37781
OXSR1	9943	1	CASSETTE	RSN_HUM:NM_005109;RSN_HUM:XM_005265638	0.974971	0.00248571	0.597663	0.00145785	0.00248571	0.377308
TP53INP1	94241	1	CASSETTE	RSN_HUM:NM_033285;RSN_HUM:NM_001135733	0.478732	0.00067825	0.103278	0.00609134	0.00609134	0.375454
FHL2	2274	28	LCASSETTE	RSN_HUM:NM_001450;RSN_HUM:NM_201555	0.758176	0.00600583	0.38325	0.00705258	0.00705258	0.374926
DLEU1	10301	1	CASSETTE	RSN_HUM:NR_002605;RSN_HUM:NR_109973	0.433135	0.00111605	0.0585236	0.00063735	0.00111605	0.374611
PUM2	23369	6	CASSETTE	RSN_HUM:NM_001282790;RSN_HUM:NM_001282791	0.79838	0.00228771	0.424036	0.00299954	0.00299954	0.374344
LRRFIP1	9208	48	XCASSETTE	RSN_HUM:XM_005246134,RSN_HUM:XM_005246136,RSN_HUM:XM_005246142,RSN_HUM:XM_005246132,RSN_HUM:XM_005246141,RSN_HUM:XM_005246133,RSN_HUM:XM_005246135,RSN_HUM:NM_001137551,RSN_HUM:NM_001137553;RSN_HUM:XM_005246122	0.953551	0.00310392	0.579385	0.00340585	0.00340585	0.374166
LRRFIP2	9209	11	XCASSETTE	RSN_HUM:NM_001134369,RSN_HUM:NM_017724,RSN_HUM:XM_005265553,RSN_HUM:XM_005265554,RSN_HUM:XM_005265555,RSN_HUM:XM_005265556,RSN_HUM:XM_005265557;RSN_HUM:XM_005265550	0.996656	0.00497873	0.622862	0.00162472	0.00497873	0.373794
MARK2	2011	8	MUT_EXCLU	RSN_HUM:NM_001163296;RSN_HUM:NM_004954,RSN_HUM:NM_017490	0.0640884	0.00151928	0.43743	0.00282911	0.00282911	0.373342
SUGT1	10910	1	CASSETTE	RSN_HUM:NM_006704;RSN_HUM:NM_001130912	0.606437	0.0069003	0.233764	0.00485532	0.0069003	0.372673
CWC25	54883	1	CASSETTE	RSN_HUM:NM_017748;RSN_HUM:NR_073428	0.990193	0.00115733	0.618046	0.00148866	0.00148866	0.372147
KAT6A	7994	3	CASSETTE	RSN_HUM:NM_006766;RSN_HUM:NM_001099413	0.826234	0.00101727	0.4546	0.0008337	0.00101727	0.371634
SLX1A	548593	2	CASSETTE	RSN_HUM:NM_001015000;RSN_HUM:NM_001014999	0.0239696	0.00172301	0.395095	0.000503254	0.00172301	0.371125
SLX1B	79008	2	CASSETTE	RSN_HUM:NM_178044;RSN_HUM:NM_024044	0.0239696	0.00172301	0.395095	0.000503254	0.00172301	0.371125
CASP8	841	11	CASSETTE	RSN_HUM:XM_005246895;RSN_HUM:NM_001080124,RSN_HUM:NM_001228,RSN_HUM:XM_005246892,RSN_HUM:XM_005246885,RSN_HUM:NM_033356	0.276752	0.00100054	0.647445	0.000158932	0.00100054	0.370693
SEC16A	9919	10	CASSETTE	RSN_HUM:XM_005266133,RSN_HUM:XM_005266136;RSN_HUM:NM_014866,RSN_HUM:XM_005266132,RSN_HUM:XM_005266134,RSN_HUM:XM_005266137	0.520805	0.0021726	0.150227	0.00250688	0.00250688	0.370578
ARHGAP12	94134	1	CASSETTE	RSN_HUM:NM_001270696,RSN_HUM:NM_001270698;RSN_HUM:NM_001270695,RSN_HUM:NM_001270699,RSN_HUM:XM_005252644	0.484297	0.00109075	0.11388	0.000482964	0.00109075	0.370417
DNAJC21	134218	1	CASSETTE	RSN_HUM:NM_001012339;RSN_HUM:NM_194283	0.830009	0.00289325	0.459886	0.0061489	0.0061489	0.370123
VEGFA	7422	21	MUT_EXCLU	RSN_HUM:NM_001025369,RSN_HUM:NM_001171627;RSN_HUM:NM_001204384,RSN_HUM:NM_001204385	0.722033	0.000822175	0.35194	0.0012637	0.0012637	0.370093
PPWD1	23398	5	CASSETTE	RSN_HUM:NM_001278927;RSN_HUM:NM_001278926	0.978737	0.001124	0.608783	9.94332e-05	0.001124	0.369954
UBE3A	7337	7	MUT_EXCLU	RSN_HUM:XM_005268268;RSN_HUM:NM_000462	0.839725	0.000214269	0.470554	0.00154248	0.00154248	0.369171
KIAA1217	56243	28	MUT_M_EXCLU	RSN_HUM:NM_001282768,RSN_HUM:XM_005252518;RSN_HUM:XM_005252506	0.667765	0.00111051	0.299042	0.00438635	0.00438635	0.368723
ZFYVE16	9765	7	CASSETTE	RSN_HUM:NM_001284237,RSN_HUM:NM_014733,RSN_HUM:XM_005248634;RSN_HUM:NM_001284236	0.827856	0.001138	0.459228	0.00033295	0.001138	0.368628
UBAP2L	9898	13	CASSETTE	RSN_HUM:NM_014847,RSN_HUM:XM_005245667;RSN_HUM:XM_005245658	0.827731	0.00321808	0.459378	0.00287606	0.00321808	0.368353
CD44	960	24	XCASSETTE	RSN_HUM:NM_001001390;RSN_HUM:XM_005253235	0.48273	0.000800655	0.11468	0.00361789	0.00361789	0.36805
CD44	960	12	XCASSETTE	RSN_HUM:NM_001001390;RSN_HUM:NM_001001389	0.483315	0.000799686	0.115661	0.00358722	0.00358722	0.367654
PHLDB2	90102	2	CASSETTE	RSN_HUM:NM_001134437,RSN_HUM:NM_145753;RSN_HUM:NM_001134438,RSN_HUM:NM_001134439	0.429812	0.00280704	0.0626333	0.0024843	0.00280704	0.367179
THAP9-AS1	100499177	2	LCASSETTE	RSN_HUM:NR_034077;RSN_HUM:NR_034075	0.380064	0.00107114	0.013049	0.00762508	0.00762508	0.367015
NUMB	8650	2	CASSETTE	RSN_HUM:XM_005268144,RSN_HUM:XM_005268145,RSN_HUM:NM_001005745,RSN_HUM:NM_003744;RSN_HUM:XM_005268142,RSN_HUM:XM_005268143,RSN_HUM:XM_005268146,RSN_HUM:NM_001005743,RSN_HUM:NM_001005744	0.540559	0.00392921	0.173761	0.00275276	0.00392921	0.366798
PI4KB	5298	3	CASSETTE	RSN_HUM:NM_001198773,RSN_HUM:NM_001198774,RSN_HUM:XM_005245264;RSN_HUM:NM_002651,RSN_HUM:XM_005245261,RSN_HUM:XM_005245262,RSN_HUM:XM_005245263,RSN_HUM:XM_005245265	0.718048	0.00306595	0.351673	0.0007979	0.00306595	0.366375
PTPN13	5783	1	CASSETTE	RSN_HUM:NM_006264;RSN_HUM:NM_080683,RSN_HUM:NM_080685,RSN_HUM:XM_005263167	0.565408	0.0032672	0.199069	0.00121415	0.0032672	0.366339
RNPS1	10921	9	CASSETTE	RSN_HUM:NM_001286626,RSN_HUM:NM_001286627;RSN_HUM:NM_080594	0.449872	0.00615097	0.0838087	0.011531	0.011531	0.366063
USMG5	84833	3	MUT_EXCLU	RSN_HUM:NM_001206427;RSN_HUM:NM_032747	0.926305	0.00131309	0.560266	0.00148215	0.00148215	0.366039
CENPL	91687	1	CASSETTE	RSN_HUM:NM_001171182,RSN_HUM:NM_033319;RSN_HUM:NM_001127181	0.820365	0.00138219	0.454884	0.00868748	0.00868748	0.365481
DNAJB14	79982	1	CASSETTE	RSN_HUM:NM_001278310;RSN_HUM:NM_001031723,RSN_HUM:XM_005263234	0.20164	0.00180867	0.565681	0.000959197	0.00180867	0.364041
EHBP1	23301	3	CASSETTE	RSN_HUM:NM_001142615,RSN_HUM:NM_001142616;RSN_HUM:XM_005264225,RSN_HUM:NM_015252,RSN_HUM:XM_005264227,RSN_HUM:XM_005264228,RSN_HUM:XM_005264226,RSN_HUM:NM_001142614	0.768517	0.00568472	0.404595	0.00159295	0.00568472	0.363922
LRRFIP1	9208	43	XCASSETTE	RSN_HUM:XM_005246134,RSN_HUM:XM_005246136,RSN_HUM:XM_005246142,RSN_HUM:XM_005246132,RSN_HUM:XM_005246141,RSN_HUM:XM_005246133,RSN_HUM:XM_005246135,RSN_HUM:NM_001137551,RSN_HUM:NM_001137553;RSN_HUM:XM_005246115	0.960542	0.00308133	0.59693	0.00330575	0.00330575	0.363612
RAD51AP1	10635	1	CASSETTE	RSN_HUM:NM_006479;RSN_HUM:NM_001130862	0.854215	0.00152588	0.491699	0.00045475	0.00152588	0.362516
ZBTB21	49854	4	CASSETTE	RSN_HUM:NM_020727;RSN_HUM:NM_001098402	0.809921	0.000546967	0.448152	0.0019644	0.0019644	0.361769
STXBP5	134957	1	LCASSETTE	RSN_HUM:NM_139244;RSN_HUM:NM_001127715	0.837334	0.00380732	0.47661	0.000334026	0.00380732	0.360724
LRRFIP1	9208	7	XCASSETTE	RSN_HUM:XM_005246134,RSN_HUM:XM_005246136,RSN_HUM:XM_005246142,RSN_HUM:XM_005246132,RSN_HUM:XM_005246141,RSN_HUM:XM_005246133,RSN_HUM:XM_005246135,RSN_HUM:NM_001137551,RSN_HUM:NM_001137553;RSN_HUM:NM_001137550,RSN_HUM:XM_005246116	0.959149	0.00308581	0.598529	0.00329692	0.00329692	0.36062
ZNF343	79175	8	LCASSETTE	RSN_HUM:NM_001282498;RSN_HUM:NM_001282497,RSN_HUM:NM_024325,RSN_HUM:NM_001282499	0.709258	0.0022783	0.349006	0.000746978	0.0022783	0.360252
BPTF	2186	4	CASSETTE	RSN_HUM:XM_005257154,RSN_HUM:XM_005257161,RSN_HUM:NM_004459,RSN_HUM:NM_182641;RSN_HUM:XM_005257150,RSN_HUM:XM_005257151,RSN_HUM:XM_005257152,RSN_HUM:XM_005257153,RSN_HUM:XM_005257155,RSN_HUM:XM_005257156,RSN_HUM:XM_005257157,RSN_HUM:XM_005257158,RSN_HUM:XM_005257159,RSN_HUM:XM_005257160	0.408463	0.00134676	0.0484044	0.00099371	0.00134676	0.360059
SLX1A	548593	1	CASSETTE	RSN_HUM:NM_001015000;RSN_HUM:NM_001014999	0.0239958	0.00172113	0.383435	0.000495086	0.00172113	0.359439
SLX1B	79008	1	CASSETTE	RSN_HUM:NM_178044;RSN_HUM:NM_024044	0.0239958	0.00172113	0.383435	0.000495086	0.00172113	0.359439
PCNX	22990	10	LCASSETTE	RSN_HUM:XM_005267426,RSN_HUM:XM_005267425;RSN_HUM:XM_005267421	0.424903	0.00109696	0.0656008	0.000770569	0.00109696	0.359302
MYO6	4646	4	XCASSETTE	RSN_HUM:XM_005248725,RSN_HUM:XM_005248726;RSN_HUM:XM_005248719,RSN_HUM:XM_005248720	0.973626	0.00137684	0.615054	0.000502558	0.00137684	0.358572
OXR1	55074	1	CASSETTE	RSN_HUM:NM_018002,RSN_HUM:NM_181354;RSN_HUM:NM_001198533,RSN_HUM:NM_001198532	0.652902	0.00142931	0.295225	0.00105987	0.00142931	0.357677
LRRFIP1	9208	44	XCASSETTE	RSN_HUM:XM_005246134,RSN_HUM:XM_005246136,RSN_HUM:XM_005246142,RSN_HUM:XM_005246132,RSN_HUM:XM_005246141,RSN_HUM:XM_005246133,RSN_HUM:XM_005246135,RSN_HUM:NM_001137551,RSN_HUM:NM_001137553;RSN_HUM:XM_005246118	0.956519	0.00309429	0.599023	0.0032942	0.0032942	0.357496
CD44	960	1	CASSETTE	RSN_HUM:NM_001001389,RSN_HUM:XM_005253235,RSN_HUM:XM_005253240;RSN_HUM:NM_000610,RSN_HUM:XM_005253231,RSN_HUM:XM_005253232,RSN_HUM:XM_005253233,RSN_HUM:XM_005253234,RSN_HUM:XM_005253239	0.959394	0.00151564	0.603111	0.00378576	0.00378576	0.356283
IP6K2	51447	10	CASSETTE	RSN_HUM:NM_001005910;RSN_HUM:NR_027437	0.470429	0.000687883	0.114522	0.00203018	0.00203018	0.355907
IP6K2	51447	15	CASSETTE	RSN_HUM:NM_001005911;RSN_HUM:NR_027438	0.470429	0.000687883	0.114522	0.00203018	0.00203018	0.355907
TFIP11	24144	1	CASSETTE	RSN_HUM:NM_012143;RSN_HUM:NM_001008697	0.938185	0.0014786	0.582759	0.0027435	0.0027435	0.355426
AKAP11	11215	2	CASSETTE	RSN_HUM:XM_005266247,RSN_HUM:XM_005266250;RSN_HUM:XM_005266248,RSN_HUM:XM_005266249,RSN_HUM:NM_016248	0.777864	0.00154095	0.422924	0.0020817	0.0020817	0.35494
TUFT1	7286	1	CASSETTE	RSN_HUM:NM_001126337;RSN_HUM:NM_020127	0.462503	0.000579888	0.108345	0.00122202	0.00122202	0.354158
PSMG4	389362	1	CASSETTE	RSN_HUM:NM_001128591;RSN_HUM:NM_001128592	0.702483	0.00258355	0.348472	0.00111085	0.00258355	0.354011
CREM	1390	1	CASSETTE	RSN_HUM:NM_001267563,RSN_HUM:NM_183060,RSN_HUM:NM_183012,RSN_HUM:NM_182772,RSN_HUM:NM_182770;RSN_HUM:NM_001267562,RSN_HUM:NM_181571,RSN_HUM:NM_183011,RSN_HUM:NM_182771,RSN_HUM:NM_182769	0.715889	0.000339498	0.362179	0.00109693	0.00109693	0.35371
ATL2	64225	1	CASSETTE	RSN_HUM:NR_024191;RSN_HUM:NM_001135673,RSN_HUM:NM_022374	0.0376886	0.00129482	0.391087	0.0020645	0.0020645	0.353398
SUPT20H	55578	1	CASSETTE	RSN_HUM:NM_001278480,RSN_HUM:NM_001278481,RSN_HUM:NM_001278482,RSN_HUM:NM_017569;RSN_HUM:NM_001014286	0.563195	0.00233695	0.210309	0.00257752	0.00257752	0.352886
SUPT20H	55578	36	CASSETTE	RSN_HUM:XM_005266460,RSN_HUM:XM_005266465,RSN_HUM:XM_005266466;RSN_HUM:XM_005266455,RSN_HUM:XM_005266462,RSN_HUM:XM_005266464	0.563195	0.00233695	0.210309	0.00257752	0.00257752	0.352886
OPA1	4976	4	CASSETTE	RSN_HUM:NM_015560,RSN_HUM:NM_130836;RSN_HUM:NM_130834,RSN_HUM:NM_130837	0.832954	0.00236754	0.480669	0.000978012	0.00236754	0.352285
WNK1	65125	12	LCASSETTE	RSN_HUM:XM_005253736,RSN_HUM:XM_005253740;RSN_HUM:NM_001184985	0.870714	0.00146127	0.518739	0.000674039	0.00146127	0.351975
MYNN	55892	12	CASSETTE	RSN_HUM:NM_018657,RSN_HUM:NR_033703;RSN_HUM:NM_001185118	0.652727	0.000903256	0.301176	0.00121636	0.00121636	0.351551
MYNN	55892	1	CASSETTE	RSN_HUM:XM_005247622;RSN_HUM:XM_005247624	0.652727	0.000903256	0.301176	0.00121636	0.00121636	0.351551
WASF1	8936	11	CASSETTE	RSN_HUM:NM_001024936;RSN_HUM:NM_001024935	0.786763	0.00081346	0.435739	0.00153257	0.00153257	0.351024
CD44	960	46	XCASSETTE	RSN_HUM:NM_001202555;RSN_HUM:XM_005253240	0.655596	0.00217802	0.304731	0.00685719	0.00685719	0.350865
OXR1	55074	9	LCASSETTE	RSN_HUM:NM_018002,RSN_HUM:NM_181354;RSN_HUM:XM_005250993,RSN_HUM:XM_005250996,RSN_HUM:XM_005250995,RSN_HUM:XM_005250994	0.803303	0.0011617	0.452674	0.000691225	0.0011617	0.350629
BCL2L11	10018	157	MUT_EXCLU	RSN_HUM:XM_005263559;RSN_HUM:XM_005263560	0.882994	3.18916e-05	0.532505	0.00144001	0.00144001	0.350489
BCL2L11	10018	5	MUT_EXCLU	RSN_HUM:NM_001204106;RSN_HUM:NM_001204111	0.882994	3.18916e-05	0.532505	0.00144001	0.00144001	0.350489
TCEB1	6921	16	CASSETTE	RSN_HUM:NM_005648;RSN_HUM:NM_001204859	0.732893	0.00486879	0.382866	0.00590363	0.00590363	0.350027
SAMD4A	23034	3	CASSETTE	RSN_HUM:NM_001161576,RSN_HUM:NM_015589;RSN_HUM:NM_001161577	0.95763	0.0029549	0.608161	0.0022767	0.0029549	0.349469
ATF2	1386	4	CASSETTE	RSN_HUM:NM_001256090,RSN_HUM:NM_001256091,RSN_HUM:NM_001256092,RSN_HUM:NM_001880,RSN_HUM:NR_045771,RSN_HUM:NR_045772,RSN_HUM:NR_045773,RSN_HUM:NR_045774;RSN_HUM:NR_045768,RSN_HUM:NR_045770	0.994122	0.00206994	0.644962	0.000624204	0.00206994	0.34916
UBAP2L	9898	11	CASSETTE	RSN_HUM:NM_001287816,RSN_HUM:XM_005245672;RSN_HUM:XM_005245669	0.584866	0.000458225	0.237024	0.00126373	0.00126373	0.347842
TRMU	55687	4	INTERNAL3	RSN_HUM:NM_001282782,RSN_HUM:NM_001282785,RSN_HUM:NM_018006;RSN_HUM:NR_104240,RSN_HUM:NR_104241	0.816059	0.00127323	0.469819	0.00184475	0.00184475	0.34624
SLC35F5	80255	5	CASSETTE	RSN_HUM:XM_005263800;RSN_HUM:XM_005263799	0.188821	0.00426594	0.534704	0.00575776	0.00575776	0.345883
USP15	9958	2	CASSETTE	RSN_HUM:NM_006313;RSN_HUM:NM_001252078,RSN_HUM:XM_005269259	0.494081	0.00194138	0.148793	0.0013092	0.00194138	0.345288
TRIM24	8805	1	INTERNAL5	RSN_HUM:NM_003852;RSN_HUM:NM_015905	0.350951	0.0012563	0.695661	0.0019061	0.0019061	0.34471
DIABLO	56616	3	MUT_EXCLU	RSN_HUM:NM_001278302;RSN_HUM:NM_001278342	0.0961947	0.00111616	0.440846	0.0025916	0.0025916	0.344651
C11orf73	51501	2	CASSETTE	RSN_HUM:NM_016401,RSN_HUM:NR_024598;RSN_HUM:NR_024597,RSN_HUM:NR_024596	0.987274	0.00266114	0.642844	0.00126322	0.00266114	0.34443
TMEM184B	25829	4	CASSETTE	RSN_HUM:XM_005261512,RSN_HUM:NM_001195071,RSN_HUM:NM_012264,RSN_HUM:XM_005261509,RSN_HUM:XM_005261510,RSN_HUM:XM_005261511;RSN_HUM:NM_001195072,RSN_HUM:XM_005261513	0.991553	0.00690208	0.64838	0.00729532	0.00729532	0.343173
GOLGA4	2803	3	CASSETTE	RSN_HUM:NM_001172713;RSN_HUM:NM_002078	0.480362	0.00389852	0.137431	0.00258166	0.00389852	0.342931
GOLGA4	2803	8	CASSETTE	RSN_HUM:XM_005265070;RSN_HUM:XM_005265075,RSN_HUM:XM_005265073,RSN_HUM:XM_005265074,RSN_HUM:XM_005265071,RSN_HUM:XM_005265069,RSN_HUM:XM_005265072	0.480362	0.00389852	0.137431	0.00258166	0.00389852	0.342931
ELK1	2002	1	CASSETTE	RSN_HUM:NM_005229;RSN_HUM:NM_001114123,RSN_HUM:NM_001257168	0.558271	0.00283697	0.215376	0.00598952	0.00598952	0.342895
ZRANB2	9406	1	CASSETTE	RSN_HUM:NM_203350;RSN_HUM:NM_005455	0.361527	0.00332368	0.0186338	0.00374588	0.00374588	0.342893
LRRC75A-AS1	125144	52	INTERNAL5	RSN_HUM:NR_027173;RSN_HUM:NR_027177	0.678072	6.43e-05	0.335794	0.00450455	0.00450455	0.342278
LRRC75A-AS1	125144	54	INTERNAL5	RSN_HUM:NR_027174;RSN_HUM:NR_027176,RSN_HUM:NR_027178	0.321928	6.43e-05	0.664206	0.00450455	0.00450455	0.342278
NASP	4678	2	CASSETTE	RSN_HUM:NM_152298;RSN_HUM:NM_001195193,RSN_HUM:NM_002482	0.501412	0.00457768	0.159424	0.00718616	0.00718616	0.341988
ZNF343	79175	4	XCASSETTE	RSN_HUM:NM_001282498;RSN_HUM:NM_001282495	0.805376	0.00200639	0.463593	0.000562347	0.00200639	0.341783
ATG4B	23192	1	CASSETTE	RSN_HUM:XM_005246992,RSN_HUM:XM_005246993,RSN_HUM:NM_013325,RSN_HUM:NM_178326;RSN_HUM:XM_005246995,RSN_HUM:XM_005246996	0.88341	0.00251752	0.541665	0.0038738	0.0038738	0.341745
MFF	56947	2	CASSETTE	RSN_HUM:NM_001277062,RSN_HUM:XM_005246682,RSN_HUM:XM_005246684,RSN_HUM:NM_001277067;RSN_HUM:NM_001277061,RSN_HUM:XM_005246681,RSN_HUM:XM_005246683,RSN_HUM:NM_020194	0.777229	0.00348536	0.437317	0.00197394	0.00348536	0.339912
NRG1	3084	34	MUT_EXCLU	RSN_HUM:NM_001160004,RSN_HUM:NM_001160008,RSN_HUM:NM_013957;RSN_HUM:NM_013960,RSN_HUM:NM_013964,RSN_HUM:NM_001159996	0.320833	0.00354171	0.660232	0.000453221	0.00354171	0.339399
CASP8	841	14	CASSETTE	RSN_HUM:NM_033358,RSN_HUM:XM_005246894,RSN_HUM:XM_005246893;RSN_HUM:NM_033355,RSN_HUM:XM_005246887,RSN_HUM:XM_005246888,RSN_HUM:NM_001080125,RSN_HUM:XM_005246891,RSN_HUM:XM_005246889,RSN_HUM:XM_005246886,RSN_HUM:XM_005246890	0.196369	0.00115446	0.535481	0.000183573	0.00115446	0.339112
ZBTB7B	51043	5	CASSETTE	RSN_HUM:NR_049765;RSN_HUM:NR_046206	0.909659	0.00102266	0.572036	0.000517857	0.00102266	0.337623
NT5C2	22978	2	CASSETTE	RSN_HUM:NM_001134373,RSN_HUM:NM_012229,RSN_HUM:XM_005269636,RSN_HUM:XM_005269639,RSN_HUM:XM_005269640,RSN_HUM:XM_005269641,RSN_HUM:XM_005269642,RSN_HUM:XM_005269643;RSN_HUM:XM_005269632,RSN_HUM:XM_005269633,RSN_HUM:XM_005269634,RSN_HUM:XM_005269635,RSN_HUM:XM_005269637,RSN_HUM:XM_005269638,RSN_HUM:XM_005269644,RSN_HUM:XM_005269645,RSN_HUM:XM_005269646	0.817598	0.00328186	0.481664	0.00256021	0.00328186	0.335934
CRCP	27297	8	CASSETTE	RSN_HUM:NM_014478;RSN_HUM:NR_024548	0.963458	0.00248615	0.627756	0.00158055	0.00248615	0.335702
SDCBP2-AS1	100507495	1	CASSETTE	RSN_HUM:NR_040049,RSN_HUM:NR_040047;RSN_HUM:NR_040048	0.444952	0.000125519	0.109661	0.00156983	0.00156983	0.335291
UBE3A	7337	14	MUT_EXCLU	RSN_HUM:XM_005268270;RSN_HUM:NM_000462	0.820845	0.000191689	0.485788	0.00158818	0.00158818	0.335057
RSRC2	65117	5	INTERNAL3	RSN_HUM:NR_036434;RSN_HUM:NR_036435,RSN_HUM:XM_005253604	0.448282	0.0005298	0.782385	0.007437	0.007437	0.334103
UBE2C	11065	8	CASSETTE	RSN_HUM:NM_001281742;RSN_HUM:NM_181799	0.572391	0.000508918	0.239802	0.00102877	0.00102877	0.332589
MYO1B	4430	4	CASSETTE	RSN_HUM:XM_005246575;RSN_HUM:NM_001130158,RSN_HUM:NM_001161819,RSN_HUM:XM_005246569,RSN_HUM:XM_005246572	0.696745	0.0082758	0.364585	0.00649232	0.0082758	0.33216
CAMK2D	817	14	INTERNAL3	RSN_HUM:XM_005263251,RSN_HUM:XM_005263252,RSN_HUM:XM_005263256,RSN_HUM:XM_005263258,RSN_HUM:XM_005263261;RSN_HUM:XM_005263253,RSN_HUM:XM_005263254	0.856195	0.00259935	0.524142	0.00106255	0.00259935	0.332053
CAMK2D	817	22	INTERNAL3	RSN_HUM:XM_005263255,RSN_HUM:NM_172114;RSN_HUM:XM_005263257	0.856195	0.00259935	0.524142	0.00106255	0.00259935	0.332053
CAMK2D	817	9	INTERNAL3	RSN_HUM:NM_001221,RSN_HUM:NM_172127,RSN_HUM:NM_172128,RSN_HUM:NM_172115;RSN_HUM:XM_005263260	0.856195	0.00259935	0.524142	0.00106255	0.00259935	0.332053
THOC5	8563	20	CASSETTE	RSN_HUM:XM_005261797;RSN_HUM:XM_005261798	0.55527	0.00230379	0.223298	0.00253607	0.00253607	0.331972
THOC5	8563	3	CASSETTE	RSN_HUM:NM_003678;RSN_HUM:NM_001002877	0.55527	0.00230379	0.223298	0.00253607	0.00253607	0.331972
MARK2	2011	7	CASSETTE	RSN_HUM:NM_001163297;RSN_HUM:NM_001163296	0.950373	0.0011929	0.61903	0.00197502	0.00197502	0.331343
WNK1	65125	13	XCASSETTE	RSN_HUM:XM_005253736,RSN_HUM:XM_005253740;RSN_HUM:NM_213655	0.892189	0.0014261	0.561951	0.000622207	0.0014261	0.330238
ZNF343	79175	7	LCASSETTE	RSN_HUM:NM_001282498;RSN_HUM:NM_001282496	0.768352	0.00210307	0.439754	0.000592831	0.00210307	0.328598
RAD17	5884	3	CASSETTE	RSN_HUM:NM_133343,RSN_HUM:NM_133342,RSN_HUM:NM_001278622,RSN_HUM:NM_133341;RSN_HUM:NM_133338	0.968337	0.00150175	0.640094	0.00159083	0.00159083	0.328243
OSBPL9	114883	4	CASSETTE	RSN_HUM:NR_036662;RSN_HUM:NM_024586,RSN_HUM:NM_148908,RSN_HUM:NM_148909	0.104773	0.00193403	0.432329	0.000588055	0.00193403	0.327556
PTK2	5747	1	CASSETTE	RSN_HUM:NM_005607,RSN_HUM:NM_153831,RSN_HUM:XM_005251004,RSN_HUM:XM_005251010,RSN_HUM:XM_005251011;RSN_HUM:NM_001199649,RSN_HUM:XM_005251003,RSN_HUM:XM_005251005,RSN_HUM:XM_005251006,RSN_HUM:XM_005251007,RSN_HUM:XM_005251008,RSN_HUM:XM_005251009,RSN_HUM:XM_005251012,RSN_HUM:XM_005251013,RSN_HUM:XM_005251014	0.982856	0.00404586	0.65602	0.0020475	0.00404586	0.326836
MARK2	2011	4	LCASSETTE	RSN_HUM:NM_001163297;RSN_HUM:NM_001039469	0.625995	0.00181104	0.299481	0.0040824	0.0040824	0.326514
LSM14A	26065	1	CASSETTE	RSN_HUM:NM_015578;RSN_HUM:NM_001114093	0.667423	0.00659684	0.34115	0.00832362	0.00832362	0.326273
SRSF6	6431	1	CASSETTE	RSN_HUM:NM_006275;RSN_HUM:NR_034009	0.794258	0.00643267	0.468065	0.002765	0.00643267	0.326193
CD44	960	64	MUT_M_EXCLU	RSN_HUM:XM_005253238;RSN_HUM:XM_005253240	0.433661	0.00130441	0.759237	0.005112	0.005112	0.325576
NR1D2	9975	1	CASSETTE	RSN_HUM:NM_005126,RSN_HUM:NM_001145425;RSN_HUM:NR_110524	0.985637	0.00473777	0.660203	0.00269286	0.00473777	0.325434
MAP3K3	4215	3	CASSETTE	RSN_HUM:NM_002401,RSN_HUM:XM_005257377;RSN_HUM:XM_005257376,RSN_HUM:XM_005257378,RSN_HUM:NM_203351	0.618134	0.00236866	0.292887	0.00598046	0.00598046	0.325247
STRN3	29966	6	LCASSETTE	RSN_HUM:NM_014574;RSN_HUM:NM_001083893	0.881058	0.0014242	0.557187	0.000546675	0.0014242	0.323871
U2AF1	7307	1	CASSETTE	RSN_HUM:NM_001025203;RSN_HUM:NM_001025204	0.523364	0.0081823	0.199988	0.00893704	0.00893704	0.323376
CLIP1	6249	1	CASSETTE	RSN_HUM:NM_002956;RSN_HUM:NM_001247997,RSN_HUM:XM_005253593,RSN_HUM:XM_005253594,RSN_HUM:XM_005253595	0.334662	0.000184664	0.0113356	0.00160556	0.00160556	0.323326
TCERG1	10915	3	CASSETTE	RSN_HUM:XM_005268367;RSN_HUM:NM_001040006,RSN_HUM:NM_006706,RSN_HUM:XM_005268365,RSN_HUM:XM_005268366	0.176884	0.00289681	0.500208	0.00281643	0.00289681	0.323324
TLE4	7091	2	CASSETTE	RSN_HUM:NM_001282749,RSN_HUM:NM_001282760,RSN_HUM:NM_007005,RSN_HUM:NR_104239,RSN_HUM:XM_005252177;RSN_HUM:NM_001282748,RSN_HUM:XM_005252167,RSN_HUM:XM_005252169,RSN_HUM:XM_005252173,RSN_HUM:XM_005252174,RSN_HUM:XM_005252175	0.995219	0.00191367	0.671986	0.00049815	0.00191367	0.323233
RBMS3	27303	4	CASSETTE	RSN_HUM:NM_001177711,RSN_HUM:NM_001177712,RSN_HUM:NM_014483;RSN_HUM:XM_005265060,RSN_HUM:XM_005265061,RSN_HUM:XM_005265062,RSN_HUM:NM_001003792,RSN_HUM:NM_001003793,RSN_HUM:XM_005265064,RSN_HUM:XM_005265063,RSN_HUM:XM_005265065	0.486395	0.0012581	0.163979	6.09834e-05	0.0012581	0.322416
VPS29	51699	10	CASSETTE	RSN_HUM:NM_001282151,RSN_HUM:NM_016226;RSN_HUM:NR_104101	0.803244	0.00361802	0.481991	0.000831036	0.00361802	0.321253
WASF1	8936	3	CASSETTE	RSN_HUM:NM_001024934,RSN_HUM:XM_005267206;RSN_HUM:NM_003931,RSN_HUM:XM_005267204	0.738638	0.000542485	0.41749	0.00149644	0.00149644	0.321148
FXR1	8087	1	CASSETTE	RSN_HUM:XM_005247814,RSN_HUM:NM_001013439,RSN_HUM:NM_005087;RSN_HUM:XM_005247813,RSN_HUM:XM_005247815	0.922075	0.00418093	0.602028	0.0091619	0.0091619	0.320047
UHRF2	115426	1	CASSETTE	RSN_HUM:NM_152896;RSN_HUM:NR_046386	0.960452	0.00249826	0.640422	0.00085809	0.00249826	0.32003
KIF23	9493	6	CASSETTE	RSN_HUM:NM_004856,RSN_HUM:XM_005254799;RSN_HUM:NM_138555,RSN_HUM:XM_005254796,RSN_HUM:XM_005254797	0.731145	0.00590662	0.411215	0.00290991	0.00590662	0.31993
TMEM116	89894	2	CASSETTE	RSN_HUM:NM_138341,RSN_HUM:XM_005253986;RSN_HUM:NM_001193453,RSN_HUM:NM_001193531,RSN_HUM:XM_005253985	0.50754	0.000264265	0.188168	0.00106979	0.00106979	0.319372
ORMDL1	94101	1	CASSETTE	RSN_HUM:NM_001128150;RSN_HUM:NM_016467	0.565435	0.00168278	0.246132	0.00228008	0.00228008	0.319303
EWSR1	2130	4	CASSETTE	RSN_HUM:NM_001163285,RSN_HUM:NM_001163286,RSN_HUM:NM_001163287,RSN_HUM:NM_005243,RSN_HUM:XM_005261390,RSN_HUM:XM_005261389;RSN_HUM:NM_013986	0.996403	0.0104955	0.677653	0.0224047	0.0224047	0.31875
SPTAN1	6709	1	CASSETTE	RSN_HUM:NM_001195532;RSN_HUM:NM_001130438,RSN_HUM:NM_003127	0.739862	0.0071762	0.421206	0.0034603	0.0071762	0.318656
ASAP1	50807	2	CASSETTE	RSN_HUM:NM_001247996,RSN_HUM:NM_018482;RSN_HUM:XM_005250925	0.998038	0.00469012	0.679872	0.00332695	0.00469012	0.318166
PRRX1	5396	1	CASSETTE	RSN_HUM:NM_022716;RSN_HUM:NM_006902	0.497506	0.0102025	0.179601	0.00477446	0.0102025	0.317905
LRRFIP1	9208	38	XCASSETTE	RSN_HUM:XM_005246130,RSN_HUM:NM_001137552,RSN_HUM:NM_004735;RSN_HUM:XM_005246137,RSN_HUM:XM_005246139,RSN_HUM:XM_005246140,RSN_HUM:XM_005246138,RSN_HUM:XM_005246112,RSN_HUM:XM_005246117,RSN_HUM:XM_005246123,RSN_HUM:XM_005246127,RSN_HUM:XM_005246113	0.967193	0.000916884	0.649436	0.00238321	0.00238321	0.317757
TRIP12	9320	2	CASSETTE	RSN_HUM:NM_001284215,RSN_HUM:NM_004238,RSN_HUM:XM_005246962,RSN_HUM:XM_005246961;RSN_HUM:NM_001284214,RSN_HUM:XM_005246954,RSN_HUM:XM_005246955,RSN_HUM:XM_005246956,RSN_HUM:XM_005246957,RSN_HUM:XM_005246958,RSN_HUM:XM_005246963	0.438334	0.00546436	0.120672	0.00585235	0.00585235	0.317662
ACP1	52	2	MUT_EXCLU	RSN_HUM:NM_004300;RSN_HUM:NM_007099	0.712666	0.00774477	0.395505	0.0090523	0.0090523	0.317161
AUH	549	9	CASSETTE	RSN_HUM:XM_005252067;RSN_HUM:XM_005252066,RSN_HUM:XM_005252068,RSN_HUM:XM_005252071,RSN_HUM:XM_005252073	0.601478	0.0012451	0.284466	0.00038915	0.0012451	0.317012
PCNX	22990	3	LCASSETTE	RSN_HUM:XM_005267426,RSN_HUM:XM_005267425;RSN_HUM:NM_014982,RSN_HUM:XM_005267427,RSN_HUM:XM_005267420,RSN_HUM:XM_005267422,RSN_HUM:XM_005267423,RSN_HUM:XM_005267424	0.371528	0.00125455	0.0547896	0.00092262	0.00125455	0.316738
TLK2	11011	4	CASSETTE	RSN_HUM:XM_005256971,RSN_HUM:NM_001284363;RSN_HUM:XM_005256970,RSN_HUM:XM_005256969,RSN_HUM:NM_001284333,RSN_HUM:NM_006852	0.559224	0.001702	0.242586	0.00173093	0.00173093	0.316638
PRMT2	3275	3	CASSETTE	RSN_HUM:NM_001286676;RSN_HUM:NM_001242864	0.508962	0.00303304	0.192829	0.00424884	0.00424884	0.316133
HMGCS1	3157	1	CASSETTE	RSN_HUM:NM_002130;RSN_HUM:NM_001098272	0.397734	0.0011739	0.0817909	0.0029013	0.0029013	0.315943
CD55	1604	1	CASSETTE	RSN_HUM:NM_000574;RSN_HUM:NM_001114752	0.797363	0.00465258	0.481458	0.0137075	0.0137075	0.315905
ECT2	1894	1	CASSETTE	RSN_HUM:XM_005247176,RSN_HUM:NM_001258316,RSN_HUM:NM_018098;RSN_HUM:NM_001258315	0.544038	0.00345062	0.228182	0.000556867	0.00345062	0.315856
ENKUR	219670	3	LCASSETTE	RSN_HUM:NR_072993;RSN_HUM:NR_072992,RSN_HUM:NM_145010	0.805247	1.76343e-05	0.489449	0.00462827	0.00462827	0.315798
FGFR1OP2	26127	2	CASSETTE	RSN_HUM:NM_001171887;RSN_HUM:NM_015633	0.106812	0.0024089	0.422492	0.00566898	0.00566898	0.31568
RNF146	81847	15	CASSETTE	RSN_HUM:NR_045102,RSN_HUM:NR_045103;RSN_HUM:NM_001242846	0.842856	0.00105487	0.52737	0.00365531	0.00365531	0.315486
UIMC1	51720	7	CASSETTE	RSN_HUM:XM_005265936;RSN_HUM:NM_001199297,RSN_HUM:NM_001199298,RSN_HUM:NM_016290,RSN_HUM:XM_005265930	0.165364	0.00106674	0.480309	0.00111845	0.00111845	0.314945
LIN54	132660	20	INTERNAL5	RSN_HUM:XM_005262749;RSN_HUM:XM_005262752	0.849687	0.00070932	0.53565	0.00161262	0.00161262	0.314037
LIN54	132660	5	INTERNAL5	RSN_HUM:NM_001115007;RSN_HUM:XM_005262750	0.150313	0.00070932	0.46435	0.00161262	0.00161262	0.314037
LIN54	132660	9	INTERNAL5	RSN_HUM:NM_001115008,RSN_HUM:NR_110254;RSN_HUM:NM_194282	0.150313	0.00070932	0.46435	0.00161262	0.00161262	0.314037
PALLD	23022	11	CASSETTE	RSN_HUM:XM_005262865,RSN_HUM:XM_005262864,RSN_HUM:XM_005262861,RSN_HUM:XM_005262862,RSN_HUM:XM_005262866;RSN_HUM:XM_005262863	0.998791	0.0116202	0.684913	0.0311818	0.0311818	0.313878
PALLD	23022	7	CASSETTE	RSN_HUM:NM_001166109,RSN_HUM:NM_001166110;RSN_HUM:NM_001166108,RSN_HUM:NM_016081	0.998791	0.0116202	0.684913	0.0311818	0.0311818	0.313878
INPP1	3628	1	CASSETTE	RSN_HUM:NM_002194;RSN_HUM:NM_001128928	0.821593	0.00144427	0.508224	0.000733534	0.00144427	0.313369
HMGN3	9324	5	INTERNAL5	RSN_HUM:NM_004242;RSN_HUM:NM_138730	0.383783	0.0051834	0.697	0.0038835	0.0051834	0.313217
STK40	83931	2	CASSETTE	RSN_HUM:NM_001282546,RSN_HUM:NM_001282547;RSN_HUM:NM_032017	0.639177	0.00119576	0.326853	0.00220741	0.00220741	0.312324
XRRA1	143570	1	CASSETTE	RSN_HUM:NM_001270380;RSN_HUM:NM_001270381,RSN_HUM:NM_182969	0.500816	0.0004289	0.189708	0.00120185	0.00120185	0.311108
NDUFAF6	137682	7	INTERNAL3	RSN_HUM:XM_005250792,RSN_HUM:XM_005250791;RSN_HUM:XM_005250793	0.59126	7.78e-05	0.901963	0.00127605	0.00127605	0.310703
FRMD4A	55691	4	CASSETTE	RSN_HUM:NM_018027,RSN_HUM:XM_005252489;RSN_HUM:XM_005252490,RSN_HUM:XM_005252494	0.786507	0.00127488	0.475919	0.00109199	0.00127488	0.310588
SLAIN2	57606	1	CASSETTE	RSN_HUM:NM_020846;RSN_HUM:XM_005248121	0.429465	0.0051981	0.119096	0.00242494	0.0051981	0.310369
HMGN3	9324	8	INTERNAL5	RSN_HUM:XM_005248768;RSN_HUM:XM_005248769	0.194709	0.0002306	0.505024	0.0018712	0.0018712	0.310315
ZC3H18	124245	1	CASSETTE	RSN_HUM:NM_144604;RSN_HUM:XM_005256282	0.73226	0.00244435	0.421972	0.0019743	0.00244435	0.310288
IKZF5	64376	5	CASSETTE	RSN_HUM:NM_001271840,RSN_HUM:NR_073475;RSN_HUM:NR_073479	0.963614	0.000564093	0.653563	0.00294274	0.00294274	0.310051
LARP4	113251	5	CASSETTE	RSN_HUM:NM_001170803,RSN_HUM:NM_001170804,RSN_HUM:NM_001170808,RSN_HUM:NM_052879,RSN_HUM:NM_199190;RSN_HUM:NR_033200,RSN_HUM:XM_005268613	0.789404	0.00163559	0.479842	0.00401608	0.00401608	0.309562
WNK1	65125	2	CASSETTE	RSN_HUM:XM_005253736,RSN_HUM:XM_005253740;RSN_HUM:XM_005253734,RSN_HUM:XM_005253735,RSN_HUM:XM_005253738,RSN_HUM:NM_018979,RSN_HUM:XM_005253743	0.452506	0.00281179	0.143123	0.00244301	0.00281179	0.309383
PLAGL1	5325	23	CASSETTE	RSN_HUM:NM_001080955,RSN_HUM:NM_001289037,RSN_HUM:NM_001289041,RSN_HUM:NM_002656;RSN_HUM:NM_001080952	0.204158	0.00210433	0.512818	0.00164831	0.00210433	0.30866
PLAGL1	5325	8	CASSETTE	RSN_HUM:NM_001080956,RSN_HUM:NM_001289038,RSN_HUM:NM_001289040;RSN_HUM:NM_001080951,RSN_HUM:NM_001080953,RSN_HUM:NM_001080954,RSN_HUM:NM_001289043,RSN_HUM:NM_001289044,RSN_HUM:NM_001289045,RSN_HUM:NM_001289048,RSN_HUM:NM_001289049,RSN_HUM:NM_006718	0.204158	0.00210433	0.512818	0.00164831	0.00210433	0.30866
DMPK	1760	3	CASSETTE	RSN_HUM:NM_001081560,RSN_HUM:NM_001081562,RSN_HUM:NM_001288766,RSN_HUM:NM_004409;RSN_HUM:NM_001288764	0.915246	0.0023114	0.606976	0.0022851	0.0023114	0.30827
UBR2	23304	2	MUT_EXCLU	RSN_HUM:XM_005248965;RSN_HUM:NM_015255	0.75685	0.00116083	0.449015	0.000406334	0.00116083	0.307835
STPG1	90529	8	LCASSETTE	RSN_HUM:NM_178122,RSN_HUM:XM_005246027;RSN_HUM:NM_001199014,RSN_HUM:XM_005246028	0.424421	0.000414329	0.116787	0.00156267	0.00156267	0.307634
C1D	10438	3	CASSETTE	RSN_HUM:NM_173177;RSN_HUM:NM_001190263	0.720375	0.00158418	0.413111	0.00130812	0.00158418	0.307264
CAMKK2	10645	12	CASSETTE	RSN_HUM:XM_005253824;RSN_HUM:XM_005253822	0.68658	0.00133102	0.380401	0.000893926	0.00133102	0.306179
CAMKK2	10645	7	CASSETTE	RSN_HUM:NM_153499,RSN_HUM:NM_153500,RSN_HUM:NM_172226;RSN_HUM:NM_001270485,RSN_HUM:NM_006549,RSN_HUM:NM_172216	0.68658	0.00133102	0.380401	0.000893926	0.00133102	0.306179
PACRGL	133015	7	LCASSETTE	RSN_HUM:NM_001258346;RSN_HUM:NM_001258345,RSN_HUM:NM_145048	0.457259	0.0011581	0.15153	0.00151719	0.00151719	0.305729
BCL2L11	10018	6	MUT_M_EXCLU	RSN_HUM:NM_001204106,RSN_HUM:NM_207003;RSN_HUM:NM_001204112,RSN_HUM:NM_001204111	0.874241	3.22109e-05	0.568525	0.00134877	0.00134877	0.305716
ATP11B	23200	1	CASSETTE	RSN_HUM:NM_014616,RSN_HUM:XM_005247243;RSN_HUM:XM_005247241	0.930335	0.00250877	0.625066	0.000792876	0.00250877	0.305269
ATF2	1386	2	CASSETTE	RSN_HUM:NM_001256092,RSN_HUM:NR_045772,RSN_HUM:NR_045773,RSN_HUM:NM_001256093;RSN_HUM:NM_001256090,RSN_HUM:NM_001256091,RSN_HUM:NM_001880,RSN_HUM:NR_045768,RSN_HUM:NR_045770,RSN_HUM:NR_045771,RSN_HUM:NR_045774,RSN_HUM:NR_045769,RSN_HUM:NM_001256094	0.375162	0.00235191	0.0701035	0.000917928	0.00235191	0.305059
PRMT2	3275	17	CASSETTE	RSN_HUM:NM_001286678;RSN_HUM:NM_001286676	0.512768	0.00335434	0.207942	0.00450223	0.00450223	0.304826
RALGAPB	57148	2	INTERNAL3	RSN_HUM:NM_001282917,RSN_HUM:NM_020336,RSN_HUM:XM_005260462,RSN_HUM:XM_005260463,RSN_HUM:XM_005260465;RSN_HUM:NM_001282918,RSN_HUM:XM_005260464	0.548448	0.0016554	0.243869	0.00262256	0.00262256	0.304579
RBM26	64062	10	CASSETTE	RSN_HUM:XM_005266499,RSN_HUM:XM_005266501,RSN_HUM:NM_022118;RSN_HUM:XM_005266492,RSN_HUM:NM_001286631	0.841758	0.00336439	0.53738	0.000749376	0.00336439	0.304378
RBM26	64062	6	CASSETTE	RSN_HUM:XM_005266498,RSN_HUM:NM_001286632;RSN_HUM:XM_005266497,RSN_HUM:XM_005266491,RSN_HUM:XM_005266493,RSN_HUM:XM_005266494,RSN_HUM:XM_005266496	0.841758	0.00336439	0.53738	0.000749376	0.00336439	0.304378
WASF1	8936	2	CASSETTE	RSN_HUM:NM_001024936;RSN_HUM:NM_001024934	0.780312	0.000820185	0.475942	0.00140311	0.00140311	0.30437
LRRFIP1	9208	27	LCASSETTE	RSN_HUM:XM_005246130,RSN_HUM:NM_001137552,RSN_HUM:NM_004735;RSN_HUM:XM_005246128,RSN_HUM:XM_005246125	0.9421	0.000941305	0.63793	0.0024262	0.0024262	0.30417
VEGFA	7422	17	CASSETTE	RSN_HUM:NM_001025368,RSN_HUM:NM_001033756,RSN_HUM:NM_001171626,RSN_HUM:NM_001171629,RSN_HUM:NM_001287044;RSN_HUM:NM_001171624,RSN_HUM:NM_003376	0.674412	0.00156329	0.370549	0.00211921	0.00211921	0.303863
IRF3	3661	2	MUT_EXCLU	RSN_HUM:NM_001197122,RSN_HUM:NM_001197124,RSN_HUM:NM_001571;RSN_HUM:NM_001197123	0.926275	0.00141117	0.62333	0.000150873	0.00141117	0.302945
SLC35B3	51000	3	CASSETTE	RSN_HUM:NM_001142541,RSN_HUM:NM_015948,RSN_HUM:NR_109914,RSN_HUM:XM_005249156,RSN_HUM:XM_005249157,RSN_HUM:XM_005249158;RSN_HUM:NR_109913	0.973446	0.00252298	0.670677	0.00322923	0.00322923	0.302769
PXN	5829	1	CASSETTE	RSN_HUM:NM_002859,RSN_HUM:NM_025157,RSN_HUM:XM_005253916;RSN_HUM:NM_001080855,RSN_HUM:XM_005253914,RSN_HUM:XM_005253915	0.800774	0.0079572	0.498367	0.00573954	0.0079572	0.302407
XIAP	331	3	CASSETTE	RSN_HUM:NR_037916;RSN_HUM:NM_001167	0.415136	0.00149084	0.114718	0.00677751	0.00677751	0.300418
E2F6	1876	2	CASSETTE	RSN_HUM:NM_001278276,RSN_HUM:NM_198256,RSN_HUM:NM_212540,RSN_HUM:NR_103490;RSN_HUM:NM_001278275,RSN_HUM:NM_001278277	0.856088	0.000327863	0.555983	0.0011018	0.0011018	0.300105
VEGFA	7422	10	CASSETTE	RSN_HUM:NM_001025368,RSN_HUM:NM_001033756,RSN_HUM:NM_001171626,RSN_HUM:NM_001171629,RSN_HUM:NM_001287044;RSN_HUM:NM_001025367,RSN_HUM:NM_001171625	0.818532	0.00128804	0.518568	0.00151431	0.00151431	0.299964
MFF	56947	22	MUT_EXCLU	RSN_HUM:NM_001277063,RSN_HUM:XM_005246686;RSN_HUM:XM_005246684,RSN_HUM:NM_001277067	0.36707	0.00184508	0.666698	0.001005	0.00184508	0.299628
ATP11B	23200	3	CASSETTE	RSN_HUM:NM_014616,RSN_HUM:XM_005247241,RSN_HUM:XM_005247242;RSN_HUM:XM_005247243	0.998912	0.0021149	0.699458	0.00069125	0.0021149	0.299454
CPEB4	80315	1	CASSETTE	RSN_HUM:XM_005265994;RSN_HUM:NM_030627	0.991581	0.0002732	0.692314	0.00327062	0.00327062	0.299267
DPH3	285381	1	CASSETTE	RSN_HUM:NM_001047434;RSN_HUM:NM_206831	0.391395	0.0041812	0.0929299	0.00334876	0.0041812	0.298465
MAP4K4	9448	24	MUT_EXCLU	RSN_HUM:XM_005264050,RSN_HUM:XM_005264052;RSN_HUM:XM_005264057,RSN_HUM:XM_005264058,RSN_HUM:NM_001242559	0.212396	0.00269824	0.510816	0.00286413	0.00286413	0.29842
MAP4K4	9448	4	MUT_EXCLU	RSN_HUM:NM_001242560,RSN_HUM:XM_005264061;RSN_HUM:NM_145686,RSN_HUM:XM_005264059,RSN_HUM:XM_005264060,RSN_HUM:XM_005264069,RSN_HUM:NM_145687	0.212396	0.00269824	0.510816	0.00286413	0.00286413	0.29842
CEP63	80254	9	LCASSETTE	RSN_HUM:NM_001042383,RSN_HUM:NM_001042400;RSN_HUM:NM_025180	0.934125	0.00277736	0.63574	0.00139224	0.00277736	0.298385
TIMM8B	26521	1	CASSETTE	RSN_HUM:NM_012459;RSN_HUM:NR_028383	0.89781	0.00685668	0.599903	0.00459441	0.00685668	0.297907
MAP4K4	9448	21	CASSETTE	RSN_HUM:XM_005264050,RSN_HUM:XM_005264052;RSN_HUM:XM_005264044,RSN_HUM:XM_005264045,RSN_HUM:XM_005264047,RSN_HUM:XM_005264048,RSN_HUM:XM_005264053,RSN_HUM:XM_005264054,RSN_HUM:XM_005264055,RSN_HUM:XM_005264056	0.310235	0.00168108	0.608007	0.00238668	0.00238668	0.297772
MAP4K4	9448	8	CASSETTE	RSN_HUM:NM_001242560,RSN_HUM:XM_005264061;RSN_HUM:XM_005264049	0.310235	0.00168108	0.608007	0.00238668	0.00238668	0.297772
COPS8	10920	1	CASSETTE	RSN_HUM:NM_006710;RSN_HUM:NM_198189	0.941551	0.00689063	0.643982	0.010245	0.010245	0.297569
RIF1	55183	1	CASSETTE	RSN_HUM:NM_001177663,RSN_HUM:NM_001177664,RSN_HUM:NM_001177665;RSN_HUM:NM_018151,RSN_HUM:XM_005246665	0.327214	0.0014926	0.0301814	0.00093435	0.0014926	0.297033
SBDSP1	155370	1	CASSETTE	RSN_HUM:NR_024109,RSN_HUM:NR_024111;RSN_HUM:NR_001588,RSN_HUM:NR_024110	0.71715	0.0041317	0.420381	0.00960252	0.00960252	0.296769
TAF1	6872	4	CASSETTE	RSN_HUM:NM_001286074,RSN_HUM:NM_004606,RSN_HUM:NM_138923,RSN_HUM:NR_104389,RSN_HUM:NR_104390,RSN_HUM:NR_104391,RSN_HUM:NR_104392,RSN_HUM:NR_104394,RSN_HUM:NR_104395;RSN_HUM:NR_104387,RSN_HUM:NR_104393,RSN_HUM:XM_005262297,RSN_HUM:XM_005262295,RSN_HUM:XM_005262296	0.784448	0.00119931	0.487767	0.00112718	0.00119931	0.296681
NFE2L1	4779	1	CASSETTE	RSN_HUM:XM_005257413,RSN_HUM:XM_005257412;RSN_HUM:NM_003204,RSN_HUM:XM_005257410	0.596305	0.0173138	0.299653	0.0367786	0.0367786	0.296652
NFE2L1	4779	6	CASSETTE	RSN_HUM:XM_005257415;RSN_HUM:XM_005257411	0.596305	0.0173138	0.299653	0.0367786	0.0367786	0.296652
AKAP13	11214	4	LCASSETTE	RSN_HUM:XM_005254843,RSN_HUM:XM_005254847,RSN_HUM:XM_005254848,RSN_HUM:XM_005254855,RSN_HUM:XM_005254856,RSN_HUM:NM_001270546;RSN_HUM:XM_005254839,RSN_HUM:XM_005254840,RSN_HUM:XM_005254841,RSN_HUM:XM_005254844,RSN_HUM:XM_005254845,RSN_HUM:XM_005254849,RSN_HUM:XM_005254850,RSN_HUM:XM_005254852,RSN_HUM:XM_005254851,RSN_HUM:XM_005254853	0.49955	0.000966869	0.203035	0.00161598	0.00161598	0.296515
TCF7L2	6934	1	CASSETTE	RSN_HUM:NM_001146283,RSN_HUM:NM_001146284,RSN_HUM:NM_001146285,RSN_HUM:NM_001146286,RSN_HUM:NM_001198525,RSN_HUM:NM_001198526,RSN_HUM:NM_001198527,RSN_HUM:NM_001198528,RSN_HUM:NM_001198529,RSN_HUM:NM_030756;RSN_HUM:NM_001146274,RSN_HUM:NM_001198531	0.781164	0.00106173	0.484831	0.000198087	0.00106173	0.296333
CRYZ	1429	2	CASSETTE	RSN_HUM:NM_001130043,RSN_HUM:NM_001889;RSN_HUM:NM_001130042	0.739095	0.00485607	0.442838	0.0013208	0.00485607	0.296257
GTF2A1	2957	1	CASSETTE	RSN_HUM:NM_015859,RSN_HUM:NM_201595;RSN_HUM:NM_001278940	0.908888	0.001637	0.613038	0.00252725	0.00252725	0.29585
TMEM5	10329	1	CASSETTE	RSN_HUM:NM_014254,RSN_HUM:NM_001278237;RSN_HUM:XM_005268562,RSN_HUM:XM_005268563	0.764228	0.00165592	0.46874	0.00433687	0.00433687	0.295488
RABL2B	11158	3	CASSETTE	RSN_HUM:NM_001003789,RSN_HUM:NM_001130922;RSN_HUM:NM_001130921	0.566027	0.00115578	0.270545	0.0018597	0.0018597	0.295482
STRN3	29966	3	CASSETTE	RSN_HUM:NM_014574;RSN_HUM:XM_005267569	0.847872	0.00147994	0.55255	0.000551263	0.00147994	0.295322
RNF146	81847	6	LCASSETTE	RSN_HUM:NM_001242851,RSN_HUM:NM_001242849,RSN_HUM:NM_001242850;RSN_HUM:NM_001242846	0.74545	0.00167747	0.450352	0.00507847	0.00507847	0.295098
TRMU	55687	5	INTERNAL3	RSN_HUM:NM_001282783,RSN_HUM:NM_001282784,RSN_HUM:XM_005261678,RSN_HUM:XM_005261681;RSN_HUM:NR_104240,RSN_HUM:NR_104241	0.456739	0.0004311	0.161695	0.0011667	0.0011667	0.295044
KLHL24	54800	10	CASSETTE	RSN_HUM:NM_017644;RSN_HUM:XM_005247552	0.731688	0.0002471	0.437065	0.00114743	0.00114743	0.294623
C2CD5	9847	8	LCASSETTE	RSN_HUM:NM_014802,RSN_HUM:XM_005253538;RSN_HUM:NM_001286175	0.339669	0.00136662	0.045078	0.000119792	0.00136662	0.294591
USP33	23032	1	CASSETTE	RSN_HUM:NM_201624;RSN_HUM:NM_015017,RSN_HUM:NM_201626	0.615388	0.00202897	0.320867	0.00140744	0.00202897	0.294521
FAM168A	23201	2	CASSETTE	RSN_HUM:NM_001286051,RSN_HUM:NM_015159;RSN_HUM:NM_001286050	0.961646	0.00273375	0.667246	0.00089195	0.00273375	0.2944
UBE2V1	7335	12	CASSETTE	RSN_HUM:NM_001032288,RSN_HUM:NM_001257396,RSN_HUM:NM_001282577,RSN_HUM:NM_001282580;RSN_HUM:NM_001282579	0.990483	0.00521152	0.696657	0.00298523	0.00521152	0.293826
PPP1R12A	4659	16	CASSETTE	RSN_HUM:NM_001244992,RSN_HUM:XM_005268891;RSN_HUM:XM_005268886	0.47175	0.00578505	0.178925	0.00115188	0.00578505	0.292825
SH3YL1	26751	4	CASSETTE	RSN_HUM:NM_001159597,RSN_HUM:NM_001282682,RSN_HUM:NR_104226,RSN_HUM:NR_104227;RSN_HUM:NM_001282687,RSN_HUM:NM_015677,RSN_HUM:NR_104223	0.641085	0.00109393	0.348928	0.0013328	0.0013328	0.292157
PRMT2	3275	5	LCASSETTE	RSN_HUM:NM_001286678;RSN_HUM:NM_001242864	0.463918	0.00370755	0.172562	0.0054253	0.0054253	0.291356
VPS29	51699	7	CASSETTE	RSN_HUM:NM_001282151,RSN_HUM:NM_016226;RSN_HUM:NM_057180	0.703039	0.0041337	0.411694	0.000972936	0.0041337	0.291345
CASP8	841	16	LCASSETTE	RSN_HUM:XM_005246895;RSN_HUM:NM_033355,RSN_HUM:XM_005246887,RSN_HUM:XM_005246888,RSN_HUM:NM_001080125,RSN_HUM:XM_005246891,RSN_HUM:XM_005246889,RSN_HUM:XM_005246886,RSN_HUM:XM_005246890	0.175539	0.00157743	0.466847	0.000220415	0.00157743	0.291308
VRK2	7444	2	CASSETTE	RSN_HUM:NM_001288837,RSN_HUM:NM_001130480,RSN_HUM:NM_001130482,RSN_HUM:NM_001288836,RSN_HUM:NM_001288839,RSN_HUM:NM_006296,RSN_HUM:NM_001130481;RSN_HUM:NM_001288838,RSN_HUM:NM_001130483	0.876475	0.00265952	0.58549	0.0008153	0.00265952	0.290985
CD44	960	25	LCASSETTE	RSN_HUM:NM_001001390;RSN_HUM:XM_005253238	0.358304	0.00107869	0.0679728	0.00610392	0.00610392	0.290331
HHLA3	11147	1	CASSETTE	RSN_HUM:NM_001036646,RSN_HUM:NM_001031693,RSN_HUM:NM_001036645;RSN_HUM:NR_027404	0.43676	0.00105497	0.146691	0.000722833	0.00105497	0.290069
VWA9	81556	7	CASSETTE	RSN_HUM:NM_001207059;RSN_HUM:NR_045107	0.59939	0.00143679	0.309956	0.00106983	0.00143679	0.289434
EIF1AD	84285	12	INTERNAL3	RSN_HUM:NM_001242485;RSN_HUM:NM_001242486	0.704587	0.0004905	0.416047	0.0010893	0.0010893	0.28854
E2F6	1876	8	LCASSETTE	RSN_HUM:NM_001278278;RSN_HUM:NM_001278276	0.38548	0.000322715	0.0970626	0.00135377	0.00135377	0.288417
PIGX	54965	1	CASSETTE	RSN_HUM:NM_017861;RSN_HUM:NM_001166304	0.96363	0.00228345	0.675379	0.0014118	0.00228345	0.288251
WAC	51322	3	CASSETTE	RSN_HUM:XM_005252459,RSN_HUM:NM_100486;RSN_HUM:XM_005252457,RSN_HUM:NR_024557,RSN_HUM:XM_005252454,RSN_HUM:NM_016628	0.402686	0.00818106	0.114871	0.0130486	0.0130486	0.287815
SERPINB1	1992	1	CASSETTE	RSN_HUM:NM_030666,RSN_HUM:NR_073112;RSN_HUM:NR_073111	0.992178	0.00369964	0.705206	0.000393502	0.00369964	0.286972
PDE4DIP	9659	3	INTERNAL5	RSN_HUM:NM_001198834,RSN_HUM:NM_014644;RSN_HUM:NM_001198832	0.437134	0.00209147	0.150245	0.00239975	0.00239975	0.286889
HMGB1	3146	6	CASSETTE	RSN_HUM:XM_005266363,RSN_HUM:XM_005266365;RSN_HUM:XM_005266368	0.995219	0.0653982	0.708423	0.0552785	0.0653982	0.286796
MARK3	4140	5	CASSETTE	RSN_HUM:NM_001128921,RSN_HUM:XM_005267641;RSN_HUM:NM_001128918,RSN_HUM:XM_005267642	0.496544	0.00320173	0.21012	0.00479582	0.00479582	0.286424
C1D	10438	4	CASSETTE	RSN_HUM:NM_006333;RSN_HUM:NM_001190265	0.665041	0.00124113	0.37862	0.00121098	0.00124113	0.286421
CLK2	1196	3	CASSETTE	RSN_HUM:XM_005244879;RSN_HUM:NM_003993	0.339508	0.000671266	0.0531217	0.00145138	0.00145138	0.286386
DIS3	22894	2	CASSETTE	RSN_HUM:NM_001128226;RSN_HUM:XM_005266294	0.749234	0.00369644	0.462878	0.00344173	0.00369644	0.286356
METAP1	23173	2	CASSETTE	RSN_HUM:NM_015143,RSN_HUM:XM_005262867;RSN_HUM:XM_005262868	0.995509	0.00208512	0.709746	0.000704545	0.00208512	0.285763
GIPC1	10755	2	CASSETTE	RSN_HUM:NM_202469;RSN_HUM:NM_005716,RSN_HUM:NM_202468	0.173066	0.00647383	0.458825	0.00439689	0.00647383	0.285759
TERF1	7013	1	CASSETTE	RSN_HUM:NM_003218,RSN_HUM:XM_005251292;RSN_HUM:NM_017489,RSN_HUM:XM_005251291	0.449694	0.00122772	0.16409	0.0005628	0.00122772	0.285604
VPS29	51699	12	INTERNAL3	RSN_HUM:NM_016226;RSN_HUM:NR_104102	0.945382	0.00307405	0.659831	0.000607052	0.00307405	0.285551
AMMECR1L	83607	2	CASSETTE	RSN_HUM:NM_001199140,RSN_HUM:NM_031445,RSN_HUM:XM_005263807;RSN_HUM:XM_005263804,RSN_HUM:XM_005263806,RSN_HUM:XM_005263808	0.915581	0.000871762	0.630268	0.00159504	0.00159504	0.285313
PLAGL1	5325	65	MUT_M_EXCLU	RSN_HUM:NM_001289038,RSN_HUM:NM_001289047;RSN_HUM:NM_001289042,RSN_HUM:NM_001289040	0.167278	0.00161324	0.452483	0.00117343	0.00161324	0.285205
FOXN2	3344	1	LCASSETTE	RSN_HUM:XM_005264282;RSN_HUM:XM_005264283	0.85902	0.000648413	0.573816	0.00117041	0.00117041	0.285204
KIAA0430	9665	7	INTERNAL5	RSN_HUM:NM_001184998,RSN_HUM:NM_001184999,RSN_HUM:NM_014647,RSN_HUM:XM_005255704,RSN_HUM:XM_005255705,RSN_HUM:XM_005255706,RSN_HUM:XM_005255707;RSN_HUM:XM_005255709	0.983232	0.00162808	0.698484	0.00148052	0.00162808	0.284748
CASP3	836	1	CASSETTE	RSN_HUM:NM_032991;RSN_HUM:NM_004346	0.506073	0.00185645	0.222418	0.0054056	0.0054056	0.283655
DYNLRB1	83658	10	CASSETTE	RSN_HUM:NM_001281729,RSN_HUM:NM_014183,RSN_HUM:NR_104032;RSN_HUM:NM_177953	0.83671	0.00436617	0.553517	0.00467032	0.00467032	0.283193
LRRFIP1	9208	79	XCASSETTE	RSN_HUM:XM_005246130,RSN_HUM:NM_001137552,RSN_HUM:NM_004735;RSN_HUM:XM_005246120	0.93963	0.00094378	0.656527	0.00235747	0.00235747	0.283103
VEGFA	7422	2	CASSETTE	RSN_HUM:NM_001025368,RSN_HUM:NM_001033756,RSN_HUM:NM_001171626,RSN_HUM:NM_001171629,RSN_HUM:NM_001287044;RSN_HUM:NM_001025366,RSN_HUM:NM_001171623	0.855702	0.00123209	0.572811	0.00137091	0.00137091	0.282891
ANKRD17	26057	2	CASSETTE	RSN_HUM:NM_198889;RSN_HUM:NM_001286771,RSN_HUM:NM_032217,RSN_HUM:XM_005265672,RSN_HUM:XM_005265673	0.364617	0.00200375	0.0819353	0.00150729	0.00200375	0.282682
USP10	9100	1	CASSETTE	RSN_HUM:NM_005153,RSN_HUM:NR_073577,RSN_HUM:NR_073578;RSN_HUM:NM_001272075	0.98206	0.00235234	0.699486	0.00148712	0.00235234	0.282574
CREM	1390	45	XCASSETTE	RSN_HUM:NR_051973,RSN_HUM:NR_051974;RSN_HUM:NM_183013	0.392177	0.000481926	0.110499	0.00114571	0.00114571	0.281678
MAP4K4	9448	18	CASSETTE	RSN_HUM:NM_145686,RSN_HUM:XM_005264057,RSN_HUM:XM_005264058,RSN_HUM:XM_005264059,RSN_HUM:XM_005264060,RSN_HUM:XM_005264069,RSN_HUM:NM_001242559,RSN_HUM:NM_145687;RSN_HUM:XM_005264044,RSN_HUM:XM_005264045,RSN_HUM:XM_005264047,RSN_HUM:XM_005264048,RSN_HUM:XM_005264049,RSN_HUM:XM_005264053,RSN_HUM:XM_005264054,RSN_HUM:XM_005264055,RSN_HUM:XM_005264056	0.843372	0.0027847	0.561774	0.00239954	0.0027847	0.281598
ERBB2IP	55914	1	LCASSETTE	RSN_HUM:NM_001006600;RSN_HUM:NM_001253697	0.742864	0.0052089	0.461298	0.00133753	0.0052089	0.281566
NUBP2	10101	2	CASSETTE	RSN_HUM:NM_001284502,RSN_HUM:NR_104318,RSN_HUM:XM_005255030,RSN_HUM:XM_005255025;RSN_HUM:NM_001284501,RSN_HUM:NM_012225,RSN_HUM:XM_005255028,RSN_HUM:XM_005255027	0.319114	0.00306913	0.600007	0.00547894	0.00547894	0.280893
BTN3A2	11118	13	CASSETTE	RSN_HUM:NM_001197249;RSN_HUM:NM_007047,RSN_HUM:XM_005248827,RSN_HUM:XM_005248831,RSN_HUM:XM_005248832	0.361391	0.00144469	0.0805331	0.00041722	0.00144469	0.280858
DNM1L	10059	7	LCASSETTE	RSN_HUM:NM_005690,RSN_HUM:XM_005253282;RSN_HUM:NM_001278464,RSN_HUM:NM_001278466,RSN_HUM:NM_012062,RSN_HUM:XM_005253283	0.638722	0.00302667	0.357889	0.0015421	0.00302667	0.280833
FIP1L1	81608	2	CASSETTE	RSN_HUM:XM_005265770,RSN_HUM:XM_005265777,RSN_HUM:XM_005265779,RSN_HUM:XM_005265774,RSN_HUM:XM_005265782,RSN_HUM:NM_001134938,RSN_HUM:NM_030917;RSN_HUM:XM_005265768,RSN_HUM:XM_005265778,RSN_HUM:XM_005265771,RSN_HUM:XM_005265772,RSN_HUM:XM_005265775,RSN_HUM:XM_005265776,RSN_HUM:XM_005265780,RSN_HUM:XM_005265769,RSN_HUM:XM_005265773,RSN_HUM:XM_005265781,RSN_HUM:NM_001134937	0.615582	0.00590322	0.334851	0.00209428	0.00590322	0.280731
LRRFIP1	9208	76	LCASSETTE	RSN_HUM:XM_005246126,RSN_HUM:XM_005246129,RSN_HUM:XM_005246131;RSN_HUM:XM_005246119	0.947252	0.00058534	0.666528	0.00170271	0.00170271	0.280724
ARFIP2	23647	4	INTERNAL3	RSN_HUM:NM_001242854;RSN_HUM:NM_012402	0.519371	0.00323035	0.239081	0.00112535	0.00323035	0.28029
PKIG	11142	1	CASSETTE	RSN_HUM:NM_007066;RSN_HUM:NM_001281444,RSN_HUM:NM_181804	0.413677	0.00559084	0.693827	0.00226858	0.00559084	0.28015
VTI1A	143187	3	CASSETTE	RSN_HUM:NM_145206,RSN_HUM:XM_005269544,RSN_HUM:XM_005269547,RSN_HUM:XM_005269548;RSN_HUM:XM_005269545,RSN_HUM:XM_005269546,RSN_HUM:XM_005269543	0.978608	0.00129301	0.698649	0.00133887	0.00133887	0.279959
BTBD1	53339	1	CASSETTE	RSN_HUM:NM_001011885;RSN_HUM:NM_025238	0.561345	0.0133018	0.281638	0.0132212	0.0133018	0.279707
CPNE1	8904	14	INTERNAL3	RSN_HUM:NM_152927;RSN_HUM:NM_152928	0.762486	0.00140651	0.482883	0.000355883	0.00140651	0.279603
RBM12	10137	5	INTERNAL3	RSN_HUM:NM_006047;RSN_HUM:NM_152838	0.762486	0.00140651	0.482883	0.000355883	0.00140651	0.279603
PLAGL1	5325	68	MUT_EXCLU	RSN_HUM:NM_001289038;RSN_HUM:NM_001289047	0.159976	0.00168687	0.439548	0.00120796	0.00168687	0.279572
RAD17	5884	12	LCASSETTE	RSN_HUM:NM_133344;RSN_HUM:NM_133338	0.810119	0.00124007	0.530916	0.00140154	0.00140154	0.279203
ARHGAP12	94134	2	CASSETTE	RSN_HUM:NM_001270695,RSN_HUM:NM_001270699,RSN_HUM:XM_005252644;RSN_HUM:NM_001270697,RSN_HUM:NM_018287	0.344952	0.00115717	0.0657868	0.00132397	0.00132397	0.279165
PDCD6	10016	1	INTERNAL5	RSN_HUM:NM_001267558,RSN_HUM:NM_013232;RSN_HUM:NM_001267556	0.806671	0.00846124	0.527829	0.0038916	0.00846124	0.278842
RNF146	81847	8	MUT_EXCLU	RSN_HUM:NM_001242844,RSN_HUM:NM_030963,RSN_HUM:NM_001242845;RSN_HUM:NM_001242852	0.961854	0.000414975	0.68376	0.00221628	0.00221628	0.278094
AZI2	64343	1	INTERNAL3	RSN_HUM:NM_001271650;RSN_HUM:XM_005265392	0.322686	0.0001534	0.0456842	0.0013856	0.0013856	0.277002
LARP7	51574	1	LCASSETTE	RSN_HUM:NM_016648;RSN_HUM:NM_001267039	0.989119	0.00169393	0.712129	0.000714966	0.00169393	0.27699
DNAJC25	548645	1	CASSETTE	RSN_HUM:NM_001015882;RSN_HUM:NR_037148	0.741657	0.000956642	0.465187	0.00209034	0.00209034	0.27647
POLR3F	10621	1	CASSETTE	RSN_HUM:NM_006466,RSN_HUM:NM_001282526;RSN_HUM:NR_104209	0.974956	0.00064885	0.698557	0.0011989	0.0011989	0.276399
AKAP13	11214	14	MUT_EXCLU	RSN_HUM:XM_005254842,RSN_HUM:XM_005254846,RSN_HUM:NM_007200,RSN_HUM:XM_005254854;RSN_HUM:NM_006738	0.755395	0.000881898	0.479042	0.00126793	0.00126793	0.276353
PACRGL	133015	12	XCASSETTE	RSN_HUM:NM_001130727;RSN_HUM:NM_001258345,RSN_HUM:NM_145048	0.430349	0.00102882	0.154036	0.00142239	0.00142239	0.276313
UAP1	6675	1	CASSETTE	RSN_HUM:NM_003115;RSN_HUM:XM_005245462	0.302042	0.0115107	0.0267037	0.00878156	0.0115107	0.275338
SMC6	79677	1	CASSETTE	RSN_HUM:NM_024624;RSN_HUM:NM_001142286	0.793105	0.00127348	0.517948	0.00113872	0.00127348	0.275157
LRRFIP1	9208	17	LCASSETTE	RSN_HUM:NM_001137552,RSN_HUM:NM_004735;RSN_HUM:NM_001137550,RSN_HUM:XM_005246128,RSN_HUM:XM_005246137,RSN_HUM:XM_005246139,RSN_HUM:XM_005246140,RSN_HUM:XM_005246138,RSN_HUM:XM_005246112,RSN_HUM:XM_005246114,RSN_HUM:XM_005246115,RSN_HUM:XM_005246116,RSN_HUM:XM_005246117,RSN_HUM:XM_005246118,RSN_HUM:XM_005246119,RSN_HUM:XM_005246120,RSN_HUM:XM_005246121,RSN_HUM:XM_005246122,RSN_HUM:XM_005246123,RSN…	0.798793	0.00109236	0.523674	0.00450116	0.00450116	0.275119
MADD	8567	6	CASSETTE	RSN_HUM:NM_130470,RSN_HUM:NM_001135944,RSN_HUM:NM_130471,RSN_HUM:NM_130472,RSN_HUM:NM_130473,RSN_HUM:NM_130474,RSN_HUM:NM_001135943,RSN_HUM:NM_130476,RSN_HUM:XM_005253193,RSN_HUM:XM_005253194,RSN_HUM:XM_005253195,RSN_HUM:XM_005253196,RSN_HUM:XM_005253197,RSN_HUM:XM_005253199,RSN_HUM:XM_005253201,RSN_HUM:XM_005253203,RSN_HUM:XM_005253204,RSN_HUM:XM_005253205;RSN_HUM:NM_003682,RSN_HUM:NM_130475,RSN…	0.998126	0.00125398	0.723413	0.00044561	0.00125398	0.274713
PCYT2	5833	1	CASSETTE	RSN_HUM:NM_001256433,RSN_HUM:NM_001256435,RSN_HUM:NM_001282203,RSN_HUM:NM_001282204,RSN_HUM:NM_002861;RSN_HUM:NM_001184917,RSN_HUM:NM_001256434,RSN_HUM:XM_005256386,RSN_HUM:XM_005256387	0.924773	0.00332326	0.650074	0.00452173	0.00452173	0.274699
INPP4B	8821	3	CASSETTE	RSN_HUM:NM_001101669,RSN_HUM:NM_003866,RSN_HUM:XM_005263323,RSN_HUM:XM_005263325;RSN_HUM:XM_005263322,RSN_HUM:XM_005263324	0.981968	0.00108975	0.707732	0.0001177	0.00108975	0.274236
EHBP1	23301	6	INTERNAL5	RSN_HUM:NM_001142615,RSN_HUM:XM_005264225,RSN_HUM:NM_001142616,RSN_HUM:NM_015252,RSN_HUM:XM_005264227,RSN_HUM:XM_005264226,RSN_HUM:NM_001142614;RSN_HUM:XM_005264228	0.886875	0.00549656	0.613323	0.00151625	0.00549656	0.273552
DYRK3	8444	1	CASSETTE	RSN_HUM:NM_003582;RSN_HUM:NM_001004023	0.929863	0.00091906	0.656692	0.00887734	0.00887734	0.273171
HMGXB4	10042	1	CASSETTE	RSN_HUM:NM_001003681;RSN_HUM:NR_027780	0.603707	0.00178933	0.330591	0.00124897	0.00178933	0.273116
SUCO	51430	2	CASSETTE	RSN_HUM:NM_016227,RSN_HUM:NM_001282750;RSN_HUM:XM_005245251,RSN_HUM:NM_001282751,RSN_HUM:NM_014283	0.302214	0.00102775	0.0291161	0.00252094	0.00252094	0.273098
RNF146	81847	3	LCASSETTE	RSN_HUM:NM_001242851,RSN_HUM:NM_001242849,RSN_HUM:NM_001242850;RSN_HUM:NM_001242852	0.770293	0.00162337	0.497438	0.00459776	0.00459776	0.272855
RBM6	10180	2	INTERNAL3	RSN_HUM:XM_005264784;RSN_HUM:NM_005777	0.213844	0.0014244	0.485456	0.0002991	0.0014244	0.271612
EXD2	55218	3	CASSETTE	RSN_HUM:NM_001193360,RSN_HUM:NM_001193361,RSN_HUM:XM_005267818,RSN_HUM:NM_001193362,RSN_HUM:NM_001193363;RSN_HUM:NR_034164,RSN_HUM:NR_034165	0.956262	0.0011043	0.684677	0.000372	0.0011043	0.271585
RBBP6	5930	1	CASSETTE	RSN_HUM:XM_005255462,RSN_HUM:NM_018703;RSN_HUM:XM_005255461,RSN_HUM:NM_006910	0.311401	0.0010578	0.0399814	0.00308894	0.00308894	0.27142
TTC3	7267	7	CASSETTE	RSN_HUM:XM_005261055,RSN_HUM:XM_005261049,RSN_HUM:XM_005261052,RSN_HUM:XM_005261048,RSN_HUM:XM_005261053,RSN_HUM:XM_005261056,RSN_HUM:XM_005261045,RSN_HUM:XM_005261046,RSN_HUM:XM_005261054,RSN_HUM:XM_005261050;RSN_HUM:XM_005261058	0.899693	0.0009132	0.628543	0.00241885	0.00241885	0.27115
ERBB2IP	55914	6	XCASSETTE	RSN_HUM:NM_001006600;RSN_HUM:XM_005248554,RSN_HUM:XM_005248555	0.795551	0.00486392	0.524648	0.00117603	0.00486392	0.270903
C1orf50	79078	1	CASSETTE	RSN_HUM:NR_040733;RSN_HUM:NM_024097	0.103112	0.00096885	0.373967	0.0013552	0.0013552	0.270855
ZFAND5	7763	1	CASSETTE	RSN_HUM:NM_001102421;RSN_HUM:NM_001102420	0.431699	0.00436184	0.161337	0.00734981	0.00734981	0.270362
NDUFAF6	137682	4	CASSETTE	RSN_HUM:NM_152416,RSN_HUM:XM_005250790,RSN_HUM:XM_005250789;RSN_HUM:XM_005250793	0.940853	0.00130369	0.670538	0.00116697	0.00130369	0.270315
IFT20	90410	2	INTERNAL3	RSN_HUM:NM_001267777,RSN_HUM:NM_001267775;RSN_HUM:NM_001267774	0.0456739	0.0017822	0.3154	0.003896	0.003896	0.269726
SCML1	6322	3	LCASSETTE	RSN_HUM:NM_001037536;RSN_HUM:NM_001037540	0.953346	0.00128788	0.68382	0.00135518	0.00135518	0.269526
ARFIP1	27236	6	CASSETTE	RSN_HUM:NM_001025593,RSN_HUM:NM_001025595;RSN_HUM:NM_001287432	0.914427	0.0021911	0.645125	0.000482775	0.0021911	0.269302
BIN1	274	2	CASSETTE	RSN_HUM:NM_139343,RSN_HUM:NM_139344,RSN_HUM:NM_139345,RSN_HUM:NM_139347,RSN_HUM:NM_139348,RSN_HUM:NM_139349,RSN_HUM:NM_139350,RSN_HUM:NM_139351,RSN_HUM:XM_005263644,RSN_HUM:XM_005263646,RSN_HUM:XM_005263648;RSN_HUM:NM_004305,RSN_HUM:NM_139346,RSN_HUM:XM_005263642,RSN_HUM:XM_005263643,RSN_HUM:XM_005263645,RSN_HUM:XM_005263647	0.973618	0.00212211	0.704345	0.000956582	0.00212211	0.269273
VWA9	81556	10	INTERNAL5	RSN_HUM:NR_045104;RSN_HUM:NR_045107	0.938112	0.00222743	0.669394	0.00168932	0.00222743	0.268718
YPEL5	51646	6	LCASSETTE	RSN_HUM:NM_016061;RSN_HUM:NM_001127401	0.937337	0.0053652	0.668637	0.00476312	0.0053652	0.2687
UBE4B	10277	3	LCASSETTE	RSN_HUM:NM_006048;RSN_HUM:XM_005263422	0.970822	0.0025601	0.702617	0.00111341	0.0025601	0.268205
LRRFIP1	9208	66	XCASSETTE	RSN_HUM:XM_005246126,RSN_HUM:XM_005246129,RSN_HUM:XM_005246131;RSN_HUM:XM_005246115	0.932267	0.000594748	0.664693	0.00170741	0.00170741	0.267574
POM121	9883	2	CASSETTE	RSN_HUM:NM_001257190;RSN_HUM:XM_005250729	0.546897	0.0010651	0.279522	0.00149469	0.00149469	0.267375
C2CD5	9847	5	LCASSETTE	RSN_HUM:NM_014802,RSN_HUM:XM_005253538;RSN_HUM:NM_001286173,RSN_HUM:NM_001286174,RSN_HUM:NM_001286176,RSN_HUM:NM_001286177,RSN_HUM:XM_005253539	0.303357	0.00153021	0.0361339	0.000149444	0.00153021	0.267223
NTMT1	28989	13	INTERNAL5	RSN_HUM:NM_001286800;RSN_HUM:NR_104596	0.920342	0.00601446	0.653264	0.0109103	0.0109103	0.267078
USP19	10869	5	INTERNAL3	RSN_HUM:NM_001199161,RSN_HUM:XM_005264829,RSN_HUM:NM_001199160,RSN_HUM:NM_006677,RSN_HUM:XM_005264823,RSN_HUM:XM_005264824,RSN_HUM:XM_005264825,RSN_HUM:XM_005264826,RSN_HUM:XM_005264830;RSN_HUM:XM_005264831,RSN_HUM:XM_005264827,RSN_HUM:XM_005264828	0.6143	0.0018328	0.347721	0.00108305	0.0018328	0.266579
MAP4K4	9448	19	CASSETTE	RSN_HUM:NM_145686,RSN_HUM:XM_005264057,RSN_HUM:XM_005264058,RSN_HUM:XM_005264059,RSN_HUM:XM_005264060,RSN_HUM:XM_005264069,RSN_HUM:NM_001242559,RSN_HUM:NM_145687;RSN_HUM:XM_005264046	0.863216	0.00272068	0.596708	0.00225906	0.00272068	0.266508
EXOC1	55763	2	CASSETTE	RSN_HUM:XM_005265750,RSN_HUM:NM_178237;RSN_HUM:XM_005265747,RSN_HUM:XM_005265748,RSN_HUM:NM_018261,RSN_HUM:NM_001024924	0.951287	0.00233715	0.684948	0.00122749	0.00233715	0.266339
MFN2	9927	10	CASSETTE	RSN_HUM:XM_005263545;RSN_HUM:XM_005263548	0.968457	0.00465478	0.702786	0.00418957	0.00465478	0.265671
MFN2	9927	6	CASSETTE	RSN_HUM:NM_014874;RSN_HUM:XM_005263543	0.968457	0.00465478	0.702786	0.00418957	0.00465478	0.265671
MORF4L2	9643	10	MUT_EXCLU	RSN_HUM:NM_001142419,RSN_HUM:NM_012286;RSN_HUM:NM_001142430,RSN_HUM:NM_001142431	0.884178	0.0112262	0.618605	0.0155085	0.0155085	0.265573
SETD5	55209	3	CASSETTE	RSN_HUM:XM_005265303,RSN_HUM:NM_001080517,RSN_HUM:XM_005265301;RSN_HUM:XM_005265299,RSN_HUM:XM_005265307	0.881407	0.00268485	0.616338	0.00175656	0.00268485	0.265069
PRMT7	54496	1	CASSETTE	RSN_HUM:NM_001184824,RSN_HUM:XM_005255988,RSN_HUM:XM_005255991;RSN_HUM:NM_019023	0.516703	0.00121121	0.251675	0.000464355	0.00121121	0.265028
SMARCA4	6597	3	INTERNAL3	RSN_HUM:NM_001128844,RSN_HUM:NM_003072,RSN_HUM:XM_005260034,RSN_HUM:NM_001128847;RSN_HUM:XM_005260028,RSN_HUM:XM_005260032,RSN_HUM:NM_001128845	0.705238	0.00402732	0.440536	0.00239054	0.00402732	0.264702
SMARCA4	6597	8	INTERNAL3	RSN_HUM:XM_005260031,RSN_HUM:XM_005260035,RSN_HUM:NM_001128848;RSN_HUM:XM_005260033,RSN_HUM:NM_001128846	0.705238	0.00402732	0.440536	0.00239054	0.00402732	0.264702
CREM	1390	89	CASSETTE	RSN_HUM:NM_183060;RSN_HUM:NM_181571	0.721636	0.00015742	0.457278	0.00212638	0.00212638	0.264358
MORF4L2	9643	8	INTERNAL3	RSN_HUM:NM_001142419,RSN_HUM:NM_012286;RSN_HUM:NM_001142421,RSN_HUM:NM_001142423	0.353619	0.0131805	0.0896757	0.00516247	0.0131805	0.263943
WIPI2	26100	3	INTERNAL5	RSN_HUM:NM_001033518,RSN_HUM:NM_001033519,RSN_HUM:NM_001033520;RSN_HUM:NM_001278299,RSN_HUM:NM_015610,RSN_HUM:NM_016003	0.433327	0.0060887	0.696849	0.0159432	0.0159432	0.263522
WASF1	8936	12	CASSETTE	RSN_HUM:NM_001024935;RSN_HUM:NM_003931	0.728542	0.000526394	0.465024	0.00141541	0.00141541	0.263518
AP3S2	10239	1	CASSETTE	RSN_HUM:NM_005829,RSN_HUM:NR_037582;RSN_HUM:NR_023361	0.934266	0.00318635	0.670885	0.00249943	0.00318635	0.263381
C7orf49	78996	6	INTERNAL5	RSN_HUM:NM_001243751;RSN_HUM:NM_001243754	0.855748	0.00247345	0.592546	0.00122615	0.00247345	0.263202
STPG1	90529	2	CASSETTE	RSN_HUM:NM_001199012,RSN_HUM:NM_001199013;RSN_HUM:NM_001199014,RSN_HUM:XM_005246028	0.934541	0.000960472	0.67141	0.00283195	0.00283195	0.263131
STX16	8675	11	CASSETTE	RSN_HUM:NM_003763;RSN_HUM:NM_001134773,RSN_HUM:NR_037941	0.435417	0.0012124	0.17262	0.00145319	0.00145319	0.262797
LETMD1	25875	4	XCASSETTE	RSN_HUM:NR_045020;RSN_HUM:NM_001243689	0.387059	0.00155403	0.124388	0.00190613	0.00190613	0.262671
SLC38A2	54407	1	CASSETTE	RSN_HUM:XM_005268983;RSN_HUM:NM_018976	0.0843802	0.0307252	0.346399	0.0289121	0.0307252	0.262019
POM121	9883	15	CASSETTE	RSN_HUM:XM_005250731;RSN_HUM:XM_005250728,RSN_HUM:XM_005250732	0.535246	0.00108828	0.273506	0.00152757	0.00152757	0.26174
PDCD4	27250	2	CASSETTE	RSN_HUM:NM_014456;RSN_HUM:NM_145341	0.987308	0.0031438	0.725603	0.0004355	0.0031438	0.261705
CNEP1R1	255919	1	CASSETTE	RSN_HUM:NM_001281789,RSN_HUM:NR_104043;RSN_HUM:NM_153261,RSN_HUM:NR_104042	0.681086	0.00112342	0.419474	0.00283773	0.00283773	0.261612
CPEB4	80315	5	CASSETTE	RSN_HUM:XM_005265996;RSN_HUM:XM_005265994	0.448649	0.00037	0.187107	0.00268028	0.00268028	0.261542
VPS45	11311	9	INTERNAL3	RSN_HUM:NM_001279354;RSN_HUM:NR_103998	0.0265755	0.00323607	0.288016	0.0004531	0.00323607	0.261441
SAFB	6294	1	INTERNAL3	RSN_HUM:NM_001201338,RSN_HUM:NM_001201340,RSN_HUM:NM_002967;RSN_HUM:NM_001201339,RSN_HUM:NR_037699	0.426325	0.0043556	0.687601	0.0098051	0.0098051	0.261276
SLC3A2	6520	1	LCASSETTE	RSN_HUM:NM_001012664;RSN_HUM:NM_001012662	0.353107	0.000738587	0.613997	0.0010772	0.0010772	0.26089
GORAB	92344	1	INTERNAL5	RSN_HUM:NM_001146039,RSN_HUM:NM_152281;RSN_HUM:NR_027397	0.787074	0.000850532	0.526381	0.00265847	0.00265847	0.260693
ZNF451	26036	4	CASSETTE	RSN_HUM:XM_005248994;RSN_HUM:NM_001031623,RSN_HUM:NM_015555	0.0475854	0.00092045	0.306881	0.00237812	0.00237812	0.259296
ZNF207	7756	1	CASSETTE	RSN_HUM:NM_001032293,RSN_HUM:XM_005258030;RSN_HUM:NM_001098507,RSN_HUM:NM_003457,RSN_HUM:XM_005258028,RSN_HUM:XM_005258029	0.417191	0.00992956	0.158155	0.000763174	0.00992956	0.259036
TUBG2	27175	1	CASSETTE	RSN_HUM:NM_016437;RSN_HUM:XM_005257222	0.914093	0.00100865	0.65527	0.00114945	0.00114945	0.258823
LARP1	23367	3	INTERNAL5	RSN_HUM:XM_005268407,RSN_HUM:NM_015315,RSN_HUM:XM_005268404,RSN_HUM:XM_005268408;RSN_HUM:XM_005268406	0.908279	0.0037625	0.649474	0.0036682	0.0037625	0.258805
ARHGAP12	94134	4	LCASSETTE	RSN_HUM:NM_001270696,RSN_HUM:NM_001270698;RSN_HUM:NM_001270697,RSN_HUM:NM_018287	0.286762	0.00184211	0.0283083	0.0019429	0.0019429	0.258454
MAPKAPK5	8550	7	CASSETTE	RSN_HUM:XM_005253974,RSN_HUM:XM_005253975,RSN_HUM:NM_003668,RSN_HUM:NM_139078,RSN_HUM:XM_005253977,RSN_HUM:XM_005253978,RSN_HUM:XM_005253976;RSN_HUM:XM_005253979	0.996411	0.00181106	0.73833	0.00162266	0.00181106	0.258081
FERMT2	10979	1	CASSETTE	RSN_HUM:NM_006832,RSN_HUM:XM_005267285;RSN_HUM:NM_001134999,RSN_HUM:NM_001135000	0.980282	0.00911057	0.72261	0.00287292	0.00911057	0.257672
MORF4L2	9643	4	INTERNAL3	RSN_HUM:NM_001142418,RSN_HUM:NM_001142422;RSN_HUM:NM_001142424,RSN_HUM:NM_001142428	0.489024	0.00282205	0.231584	0.0161637	0.0161637	0.25744
ACOT8	10005	1	CASSETTE	RSN_HUM:XM_005260240;RSN_HUM:NM_005469	0.401993	0.00223262	0.659377	0.00123071	0.00223262	0.257384
ZNF542P	147947	2	CASSETTE	RSN_HUM:NR_024055,RSN_HUM:NR_024057;RSN_HUM:NR_003127,RSN_HUM:NR_024056	0.741449	0.00100567	0.484495	0.000930768	0.00100567	0.256954
SPATS2L	26010	36	MUT_EXCLU	RSN_HUM:XM_005246457;RSN_HUM:XM_005246456,RSN_HUM:XM_005246460	0.469247	0.000461302	0.213156	0.00146234	0.00146234	0.256091
GEMIN7	79760	5	CASSETTE	RSN_HUM:NM_001007269;RSN_HUM:NM_024707	0.291161	0.00107878	0.0353665	0.000819984	0.00107878	0.255794
ZMIZ2	83637	2	CASSETTE	RSN_HUM:XM_005249870,RSN_HUM:XM_005249872,RSN_HUM:XM_005249874,RSN_HUM:NM_174929;RSN_HUM:XM_005249866,RSN_HUM:XM_005249869,RSN_HUM:XM_005249871,RSN_HUM:XM_005249873,RSN_HUM:XM_005249875,RSN_HUM:NM_031449,RSN_HUM:XM_005249867,RSN_HUM:XM_005249868	0.630811	0.00140628	0.375675	0.00138056	0.00140628	0.255136
MFF	56947	29	LCASSETTE	RSN_HUM:NM_001277065,RSN_HUM:NM_001277066,RSN_HUM:NR_102266,RSN_HUM:XM_005246688;RSN_HUM:XM_005246681	0.762732	0.00313046	0.507624	0.00178892	0.00313046	0.255108
UBE4B	10277	1	CASSETTE	RSN_HUM:NM_006048;RSN_HUM:NM_001105562	0.962248	0.00258291	0.707507	0.00110571	0.00258291	0.254741
DEPDC1	55635	1	CASSETTE	RSN_HUM:NM_017779;RSN_HUM:NM_001114120	0.904298	0.00232899	0.649763	0.00119505	0.00232899	0.254535
PPP1R12A	4659	3	CASSETTE	RSN_HUM:NM_001244992,RSN_HUM:XM_005268891;RSN_HUM:NM_001143885,RSN_HUM:NM_001143886,RSN_HUM:NM_001244990,RSN_HUM:NM_002480,RSN_HUM:XM_005268887,RSN_HUM:XM_005268889,RSN_HUM:XM_005268885,RSN_HUM:XM_005268888	0.362407	0.00753049	0.108288	0.00190326	0.00753049	0.254119
FAIM	55179	4	CASSETTE	RSN_HUM:NM_001033032;RSN_HUM:NM_001033031	0.996382	0.0012714	0.742329	0.00013525	0.0012714	0.254053
RWDD1	51389	1	CASSETTE	RSN_HUM:NM_015952;RSN_HUM:NM_001007464	0.752344	0.0070498	0.498331	0.00361748	0.0070498	0.254013
NSDHL	50814	1	CASSETTE	RSN_HUM:NM_015922;RSN_HUM:NM_001129765	0.931149	0.00229555	0.67758	0.00127675	0.00229555	0.253569
UBE2V1	7335	5	CASSETTE	RSN_HUM:NM_001032288,RSN_HUM:NM_001257396,RSN_HUM:NM_001282577,RSN_HUM:NM_001282580;RSN_HUM:NM_001257397	0.990521	0.00521132	0.737206	0.00282103	0.00521132	0.253315
LDB2	9079	12	CASSETTE	RSN_HUM:XM_005248197;RSN_HUM:XM_005248201	0.583291	0.00154708	0.33017	0.000269255	0.00154708	0.253121
LDB2	9079	1	CASSETTE	RSN_HUM:NM_001290,RSN_HUM:XM_005248205;RSN_HUM:NM_001130834	0.583291	0.00154708	0.33017	0.000269255	0.00154708	0.253121
C9orf89	84270	1	CASSETTE	RSN_HUM:XM_005252273;RSN_HUM:NM_032310	0.515308	0.004723	0.262314	0.00596536	0.00596536	0.252994
RAC1	5879	1	CASSETTE	RSN_HUM:NM_006908;RSN_HUM:NM_018890	0.933498	0.0351177	0.680979	0.0375891	0.0375891	0.252519
ATXN1	6310	1	CASSETTE	RSN_HUM:NM_001128164;RSN_HUM:NM_000332	0.971976	0.0016807	0.719575	0.00073335	0.0016807	0.252401
DAP3	7818	16	CASSETTE	RSN_HUM:NM_001199850,RSN_HUM:NM_001199851;RSN_HUM:NM_001199849	0.881368	0.00218154	0.629001	0.00354489	0.00354489	0.252367
MYBL1	4603	1	CASSETTE	RSN_HUM:NM_001144755,RSN_HUM:XM_005251251;RSN_HUM:NM_001080416	0.749934	0.00295573	0.497648	0.000922138	0.00295573	0.252286
SMG7	9887	3	INTERNAL5	RSN_HUM:NM_001174061,RSN_HUM:NM_173156,RSN_HUM:XM_005245656,RSN_HUM:XM_005245649,RSN_HUM:XM_005245652,RSN_HUM:XM_005245647,RSN_HUM:XM_005245654,RSN_HUM:XM_005245648,RSN_HUM:XM_005245655,RSN_HUM:XM_005245653;RSN_HUM:NM_201568,RSN_HUM:NM_201569	0.399683	0.0023346	0.147642	0.0019256	0.0023346	0.252041
UBAP1	51271	9	CASSETTE	RSN_HUM:NM_001171202,RSN_HUM:NM_016525;RSN_HUM:NR_033243	0.931792	0.0012887	0.679837	0.0013212	0.0013212	0.251955
VDAC3	7419	1	CASSETTE	RSN_HUM:NM_005662;RSN_HUM:NM_001135694	0.988067	0.0337899	0.736525	0.0136138	0.0337899	0.251542
PLAGL1	5325	63	MUT_M_EXCLU	RSN_HUM:NM_001289037;RSN_HUM:NM_001289047	0.138471	0.00164477	0.389992	0.00110983	0.00164477	0.251521
PTPN2	5771	3	CASSETTE	RSN_HUM:NM_001207013,RSN_HUM:NM_080422;RSN_HUM:XM_005258125	0.973062	0.00109325	0.721585	0.00089345	0.00109325	0.251477
TSEN15	116461	2	LCASSETTE	RSN_HUM:NM_001127394;RSN_HUM:NR_023349	0.429531	0.00196959	0.178923	0.000720981	0.00196959	0.250608
LETMD1	25875	11	LCASSETTE	RSN_HUM:NR_045020;RSN_HUM:NR_045019	0.368095	0.00163409	0.118263	0.00200485	0.00200485	0.249832
CAMK2D	817	16	CASSETTE	RSN_HUM:XM_005263256;RSN_HUM:XM_005263251,RSN_HUM:XM_005263252,RSN_HUM:XM_005263253,RSN_HUM:XM_005263254,RSN_HUM:XM_005263255,RSN_HUM:XM_005263257,RSN_HUM:XM_005263260	0.702525	0.00364912	0.452831	0.00192235	0.00364912	0.249694
CAMK2D	817	2	CASSETTE	RSN_HUM:NM_172128;RSN_HUM:NM_001221	0.702525	0.00364912	0.452831	0.00192235	0.00364912	0.249694
PLAGL1	5325	53	MUT_EXCLU	RSN_HUM:NM_001080955,RSN_HUM:NM_001289037,RSN_HUM:NM_001289041,RSN_HUM:NM_002656;RSN_HUM:NM_001289042	0.186056	0.0017387	0.435466	0.00120122	0.0017387	0.24941
ATP5C1	509	1	CASSETTE	RSN_HUM:NM_005174;RSN_HUM:NM_001001973	0.54224	0.0137329	0.293192	0.00587908	0.0137329	0.249048
NBPF15	284565	2	LCASSETTE	RSN_HUM:XM_005245096,RSN_HUM:XM_005245097,RSN_HUM:NM_173638;RSN_HUM:NM_001170755	0.892493	0.00205189	0.644364	0.00221839	0.00221839	0.248129
KDELC1	79070	2	CASSETTE	RSN_HUM:NM_024089,RSN_HUM:XM_005254075;RSN_HUM:XM_005254076	0.965106	0.00207718	0.717041	0.00168875	0.00207718	0.248065
TMEM126B	55863	7	CASSETTE	RSN_HUM:NM_018480;RSN_HUM:NM_001193538	0.471572	0.00384056	0.223985	0.00183495	0.00384056	0.247587
PALLD	23022	1	CASSETTE	RSN_HUM:NM_016081,RSN_HUM:XM_005262862,RSN_HUM:NM_001166109,RSN_HUM:NM_001166110;RSN_HUM:NM_001166108,RSN_HUM:XM_005262863,RSN_HUM:XM_005262861,RSN_HUM:XM_005262866	0.974769	0.00905581	0.727339	0.024148	0.024148	0.24743
TCAIM	285343	4	INTERNAL3	RSN_HUM:NM_001282913,RSN_HUM:NM_173826;RSN_HUM:NM_001282915,RSN_HUM:NM_001282914	0.522637	0.00084852	0.275268	0.001957	0.001957	0.247369
SETD5	55209	7	CASSETTE	RSN_HUM:NM_001080517,RSN_HUM:XM_005265301;RSN_HUM:XM_005265303,RSN_HUM:XM_005265307	0.403822	0.00143246	0.157102	0.00121972	0.00143246	0.24672
INPP4A	3631	3	INTERNAL5	RSN_HUM:NM_001134224,RSN_HUM:NM_001134225;RSN_HUM:NM_001566,RSN_HUM:NM_004027	0.777411	0.0012431	0.532071	0.0008606	0.0012431	0.24534
GIPC1	10755	7	MUT_EXCLU	RSN_HUM:NM_202469;RSN_HUM:NM_202470	0.167027	0.00493951	0.411857	0.00307286	0.00493951	0.24483
STIM2	57620	1	CASSETTE	RSN_HUM:NM_001169117,RSN_HUM:NM_020860;RSN_HUM:NM_001169118	0.865622	0.0005998	0.62081	0.00129315	0.00129315	0.244812
THOC5	8563	5	CASSETTE	RSN_HUM:NM_001002877,RSN_HUM:NM_001002878,RSN_HUM:NM_001002879,RSN_HUM:NM_003678;RSN_HUM:XM_005261797,RSN_HUM:XM_005261798,RSN_HUM:XM_005261799	0.489446	0.00246389	0.246804	0.00292596	0.00292596	0.242642
ZNF655	79027	19	LCASSETTE	RSN_HUM:NM_138494,RSN_HUM:NM_001009960;RSN_HUM:XM_005250581	0.43224	0.00106978	0.189663	0.000903442	0.00106978	0.242577
CDK13	8621	1	INTERNAL3	RSN_HUM:NM_003718;RSN_HUM:NM_031267	0.202449	0.0023517	0.444094	0.0010151	0.0023517	0.241645
LETMD1	25875	10	XCASSETTE	RSN_HUM:NR_045020;RSN_HUM:NR_045018	0.356075	0.00168925	0.114444	0.00207175	0.00207175	0.241631
ERC1	23085	1	CASSETTE	RSN_HUM:NM_178039,RSN_HUM:NR_027946,RSN_HUM:NR_027948;RSN_HUM:NM_178040	0.249471	0.00153685	0.00791738	0.000581	0.00153685	0.241554
PTBP3	9991	2	CASSETTE	RSN_HUM:NM_001244897,RSN_HUM:NM_001163788,RSN_HUM:NM_001244896;RSN_HUM:NM_001163790	0.974116	0.00189936	0.732888	0.00389111	0.00389111	0.241228
PACRGL	133015	9	LCASSETTE	RSN_HUM:NM_001130727;RSN_HUM:NR_047661	0.459953	0.000962599	0.219169	0.000999684	0.000999684	0.240784
PHLDB1	23187	3	CASSETTE	RSN_HUM:NM_001144759;RSN_HUM:NM_015157,RSN_HUM:NM_001144758	0.993213	0.0040079	0.752576	0.00058705	0.0040079	0.240637
MBNL2	10150	1	LCASSETTE	RSN_HUM:XM_005254019,RSN_HUM:NM_207304;RSN_HUM:XM_005254018,RSN_HUM:NM_144778	0.767663	0.00244853	0.527153	0.0016665	0.00244853	0.24051
ST5	6764	1	CASSETTE	RSN_HUM:NM_139157,RSN_HUM:XM_005253083,RSN_HUM:XM_005253084;RSN_HUM:NM_005418,RSN_HUM:NM_213618,RSN_HUM:XM_005253077,RSN_HUM:XM_005253079,RSN_HUM:XM_005253080,RSN_HUM:XM_005253081	0.182582	0.00136632	0.423059	0.000135915	0.00136632	0.240477
MIR22HG	84981	1	CASSETTE	RSN_HUM:NR_028505,RSN_HUM:NR_028503;RSN_HUM:NR_028504	0.29399	0.00167682	0.0536855	0.00423392	0.00423392	0.240304
ERBB2IP	55914	4	LCASSETTE	RSN_HUM:NM_001006600;RSN_HUM:NM_001253699	0.756947	0.00511198	0.516658	0.00119421	0.00511198	0.240289
GREM1	26585	1	INTERNAL5	RSN_HUM:NM_001191322;RSN_HUM:NM_001191323	0.377828	0.0032843	0.137601	0.0008888	0.0032843	0.240227
TMEM184B	25829	9	CASSETTE	RSN_HUM:XM_005261512,RSN_HUM:NM_001195071,RSN_HUM:NM_012264,RSN_HUM:XM_005261509,RSN_HUM:XM_005261510,RSN_HUM:XM_005261511;RSN_HUM:XM_005261514	0.993554	0.00688818	0.753894	0.00627427	0.00688818	0.23966
ZNF655	79027	4	LCASSETTE	RSN_HUM:NM_001083956,RSN_HUM:NM_001085368;RSN_HUM:XM_005250577,RSN_HUM:XM_005250578	0.378267	0.0014651	0.138852	0.00187753	0.00187753	0.239415
C17orf70	80233	1	INTERNAL5	RSN_HUM:NM_025161;RSN_HUM:NR_033338	0.528117	0.0013764	0.288833	0.0009618	0.0013764	0.239284
RNF146	81847	11	MUT_EXCLU	RSN_HUM:NM_001242844,RSN_HUM:NM_030963,RSN_HUM:NM_001242845;RSN_HUM:NM_001242846	0.706563	0.000564911	0.467282	0.00324301	0.00324301	0.239281
YTHDF3	253943	1	MUT_EXCLU	RSN_HUM:NM_001277813,RSN_HUM:NM_001277814;RSN_HUM:NM_001277815	0.522955	0.000250272	0.76188	0.00241004	0.00241004	0.238925
CCNT2	905	4	CASSETTE	RSN_HUM:NM_001241,RSN_HUM:NM_058241;RSN_HUM:NR_037649	0.977476	0.00080135	0.73883	0.00394773	0.00394773	0.238646
ABL2	27	6	CASSETTE	RSN_HUM:NM_001168238,RSN_HUM:NM_001168236,RSN_HUM:NM_001136001;RSN_HUM:NM_001168237,RSN_HUM:NM_007314	0.273423	0.00041145	0.0348883	0.0022787	0.0022787	0.238535
WDYHV1	55093	1	CASSETTE	RSN_HUM:NM_001283024,RSN_HUM:NM_018024;RSN_HUM:NM_001283027	0.966541	0.0010879	0.728025	0.000459233	0.0010879	0.238516
LETMD1	25875	8	XCASSETTE	RSN_HUM:NR_045020;RSN_HUM:NM_015416,RSN_HUM:NR_045017	0.340562	0.0017662	0.102074	0.00232283	0.00232283	0.238488
CCSER2	54462	1	CASSETTE	RSN_HUM:NM_001284240,RSN_HUM:NM_001284242;RSN_HUM:NM_018999,RSN_HUM:NM_001284243	0.515421	0.00204998	0.27705	0.000560188	0.00204998	0.238371
LRRFIP1	9208	13	XCASSETTE	RSN_HUM:XM_005246126,RSN_HUM:XM_005246129,RSN_HUM:XM_005246131;RSN_HUM:NM_001137550,RSN_HUM:XM_005246116	0.926766	0.000598278	0.688792	0.00164767	0.00164767	0.237974
MFF	56947	12	MUT_M_EXCLU	RSN_HUM:NM_001277062,RSN_HUM:XM_005246682,RSN_HUM:XM_005246681,RSN_HUM:XM_005246687,RSN_HUM:XM_005246685,RSN_HUM:NM_001277067;RSN_HUM:NM_001277063,RSN_HUM:XM_005246686,RSN_HUM:NM_001277064,RSN_HUM:XM_005246681,RSN_HUM:XM_005246684,RSN_HUM:XM_005246685	0.71903	0.00241048	0.481371	0.00129193	0.00241048	0.237659
PRMT2	3275	20	XCASSETTE	RSN_HUM:NM_001286677;RSN_HUM:NM_001535,RSN_HUM:NM_206962	0.342948	0.00430152	0.105441	0.00748002	0.00748002	0.237507
PCBP2	5094	5	CASSETTE	RSN_HUM:NM_001128914;RSN_HUM:NM_001098620,RSN_HUM:NM_001128913,RSN_HUM:NM_005016,RSN_HUM:NM_031989	0.364704	0.0391515	0.127967	0.0614965	0.0614965	0.236737
PEAK1	79834	4	CASSETTE	RSN_HUM:NM_024776,RSN_HUM:XM_005254670,RSN_HUM:XM_005254671,RSN_HUM:XM_005254673,RSN_HUM:XM_005254674;RSN_HUM:XM_005254672	0.95146	0.00217245	0.714769	0.0006507	0.00217245	0.236691
TMEM184B	25829	12	CASSETTE	RSN_HUM:NM_001195071,RSN_HUM:NM_001195072,RSN_HUM:NM_012264,RSN_HUM:XM_005261510;RSN_HUM:XM_005261509,RSN_HUM:XM_005261511,RSN_HUM:XM_005261513,RSN_HUM:XM_005261514	0.956691	0.0053799	0.72015	0.00654833	0.00654833	0.236541
ZYX	7791	1	INTERNAL3	RSN_HUM:XM_005250052;RSN_HUM:XM_005250053	0.510458	0.00606015	0.746618	0.00068	0.00606015	0.23616
ZYX	7791	3	INTERNAL3	RSN_HUM:NM_001010972;RSN_HUM:NM_003461	0.489542	0.00606015	0.253382	0.00068	0.00606015	0.23616
RALGPS2	55103	1	CASSETTE	RSN_HUM:NM_001286247;RSN_HUM:NM_152663	0.73237	0.0035904	0.496451	0.001465	0.0035904	0.235919
MBD1	4152	9	CASSETTE	RSN_HUM:NM_001204143,RSN_HUM:NM_002384,RSN_HUM:NM_015845,RSN_HUM:NM_001204142,RSN_HUM:XM_005258274,RSN_HUM:NM_001204151;RSN_HUM:NM_001204139,RSN_HUM:NM_001204141,RSN_HUM:XM_005258264,RSN_HUM:NM_001204136,RSN_HUM:NM_015844,RSN_HUM:NM_015846,RSN_HUM:NM_015847,RSN_HUM:XM_005258262,RSN_HUM:NM_001204137,RSN_HUM:NM_001204140,RSN_HUM:XM_005258265,RSN_HUM:XM_005258268,RSN_HUM:XM_005258271,RSN_HUM:XM_0052…	0.247304	0.0021362	0.482791	0.00344107	0.00344107	0.235487
ZNF426	79088	1	CASSETTE	RSN_HUM:XM_005260076;RSN_HUM:NM_024106,RSN_HUM:XM_005260077	0.561552	0.00134378	0.326926	0.00033035	0.00134378	0.234626
NFS1	9054	3	CASSETTE	RSN_HUM:NM_021100;RSN_HUM:NR_037570	0.968148	0.00148655	0.733624	0.0001603	0.00148655	0.234524
MORF4L2	9643	22	MUT_EXCLU	RSN_HUM:NM_001142425,RSN_HUM:NM_001142427;RSN_HUM:NM_001142430,RSN_HUM:NM_001142431	0.868551	0.00989153	0.634561	0.0161856	0.0161856	0.23399
IFT46	56912	1	CASSETTE	RSN_HUM:NM_001168618;RSN_HUM:NM_020153	0.77497	0.0021466	0.541424	0.00127045	0.0021466	0.233546
DCAF6	55827	5	CASSETTE	RSN_HUM:NM_018442,RSN_HUM:XM_005245332;RSN_HUM:NM_001198956,RSN_HUM:NM_001198957,RSN_HUM:XM_005245331	0.730741	0.00142157	0.497492	0.00101409	0.00142157	0.233249
PHF1	5252	3	INTERNAL3	RSN_HUM:NM_024165;RSN_HUM:NR_027692	0.659749	0.00289822	0.426695	0.00395017	0.00395017	0.233054
GPCPD1	56261	2	LCASSETTE	RSN_HUM:XM_005260760;RSN_HUM:NM_019593,RSN_HUM:XM_005260758	0.044822	0.00138325	0.277839	0.00711743	0.00711743	0.233017
TRA2A	29896	6	CASSETTE	RSN_HUM:NM_001282758;RSN_HUM:NM_001282759	0.945982	0.00336053	0.713586	0.00527589	0.00527589	0.232396
FAM122B	159090	3	CASSETTE	RSN_HUM:NM_001166599,RSN_HUM:NM_145284;RSN_HUM:NM_001166600,RSN_HUM:NM_001170756	0.63043	0.00158262	0.398299	0.00130756	0.00158262	0.232131
INSIG1	3638	2	CASSETTE	RSN_HUM:NM_005542,RSN_HUM:NM_198337;RSN_HUM:NM_198336,RSN_HUM:XM_005249542,RSN_HUM:XM_005249543	0.852128	0.00262108	0.621017	0.00449537	0.00449537	0.231111
THAP5	168451	7	CASSETTE	RSN_HUM:NM_001287601;RSN_HUM:NM_001287599	0.377014	0.000553826	0.145969	0.00234502	0.00234502	0.231045
NDUFV3	4731	1	CASSETTE	RSN_HUM:NM_001001503;RSN_HUM:NM_021075	0.355936	0.00339471	0.125918	0.00388746	0.00388746	0.230018
CSDE1	7812	1	CASSETTE	RSN_HUM:NM_001130523,RSN_HUM:NM_001242893,RSN_HUM:NM_007158;RSN_HUM:NM_001007553,RSN_HUM:NM_001242891,RSN_HUM:NM_001242892	0.813658	0.0233121	0.583684	0.0307475	0.0307475	0.229974
SENP1	29843	3	CASSETTE	RSN_HUM:NM_001267594,RSN_HUM:NM_001267595;RSN_HUM:NR_051991,RSN_HUM:NR_051992	0.945727	0.00124335	0.716263	0.000710214	0.00124335	0.229464
STRADB	55437	3	INTERNAL3	RSN_HUM:NM_001206864,RSN_HUM:NM_018571,RSN_HUM:XM_005246670;RSN_HUM:XM_005246669	0.868333	0.00205063	0.638876	0.0008648	0.00205063	0.229457
GPCPD1	56261	3	CASSETTE	RSN_HUM:XM_005260761;RSN_HUM:NM_019593,RSN_HUM:XM_005260758	0.0955913	0.0012135	0.324983	0.0061957	0.0061957	0.229392
TMED2	10959	1	CASSETTE	RSN_HUM:NM_006815;RSN_HUM:XM_005253544	0.996109	0.0344017	0.767052	0.0495455	0.0495455	0.229057
GIGYF2	26058	14	XCASSETTE	RSN_HUM:NM_001103148;RSN_HUM:NM_015575,RSN_HUM:NR_103494	0.265901	0.000418202	0.0374766	0.0010193	0.0010193	0.228424
FOXRED1	55572	1	CASSETTE	RSN_HUM:NR_037647;RSN_HUM:NM_017547	0.191433	0.00104737	0.419678	0.000438313	0.00104737	0.228245
CPSF7	79869	1	INTERNAL5	RSN_HUM:NM_001136040,RSN_HUM:NM_024811;RSN_HUM:NM_001142565	0.469786	0.0026544	0.697984	0.003473	0.003473	0.228198
ZNF655	79027	3	CASSETTE	RSN_HUM:NM_138494,RSN_HUM:NM_001009960;RSN_HUM:NM_001083956,RSN_HUM:NM_001085368	0.372521	0.00124127	0.144839	0.00118304	0.00124127	0.227682
LRRFIP1	9208	77	XCASSETTE	RSN_HUM:XM_005246130,RSN_HUM:NM_001137552,RSN_HUM:NM_004735;RSN_HUM:XM_005246119	0.974245	0.000910247	0.746587	0.00207309	0.00207309	0.227658
TRMU	55687	3	CASSETTE	RSN_HUM:NM_001282782,RSN_HUM:NM_001282783,RSN_HUM:NM_001282784,RSN_HUM:NR_104241;RSN_HUM:NM_001282785,RSN_HUM:NM_018006,RSN_HUM:NR_104240,RSN_HUM:XM_005261678,RSN_HUM:XM_005261681	0.194381	0.00134569	0.421804	0.00198647	0.00198647	0.227423
SLC4A7	9497	3	CASSETTE	RSN_HUM:NM_001258379,RSN_HUM:NM_001258380,RSN_HUM:XM_005265598,RSN_HUM:XM_005265601;RSN_HUM:NM_003615	0.979904	0.00119522	0.752573	0.000786768	0.00119522	0.227331
DNM1L	10059	4	CASSETTE	RSN_HUM:NM_005690,RSN_HUM:XM_005253282;RSN_HUM:NM_001278463,RSN_HUM:NM_001278465	0.727455	0.00265748	0.500174	0.00110342	0.00265748	0.227281
ARMC8	25852	4	CASSETTE	RSN_HUM:NM_001267041,RSN_HUM:NM_001267042;RSN_HUM:NM_014154,RSN_HUM:NM_015396	0.50096	0.0011983	0.273855	0.00158533	0.00158533	0.227105
RWDD1	51389	3	LCASSETTE	RSN_HUM:NM_015952;RSN_HUM:NM_016104	0.88445	0.00599681	0.6575	0.00274175	0.00599681	0.22695
PPP1CA	5499	2	CASSETTE	RSN_HUM:NM_206873;RSN_HUM:NM_001008709	0.105161	0.00741245	0.331929	0.0066698	0.00741245	0.226768
ZNF655	79027	16	CASSETTE	RSN_HUM:XM_005250581;RSN_HUM:NM_024061,RSN_HUM:XM_005250577,RSN_HUM:XM_005250578,RSN_HUM:NM_001085367	0.326342	0.00169638	0.0996896	0.00237738	0.00237738	0.226652
PRMT2	3275	22	XCASSETTE	RSN_HUM:NM_001286678;RSN_HUM:NM_001535,RSN_HUM:NM_206962	0.34757	0.00494864	0.120994	0.00773757	0.00773757	0.226576
SCAF4	57466	1	INTERNAL3	RSN_HUM:NM_001145444,RSN_HUM:NM_020706;RSN_HUM:NM_001145445	0.657807	0.0016704	0.431301	0.0045954	0.0045954	0.226506
KLF6	1316	3	INTERNAL5	RSN_HUM:NM_001160124;RSN_HUM:NR_027653	0.814868	0.0004197	0.588393	0.0020833	0.0020833	0.226475
INTS8	55656	4	INTERNAL3	RSN_HUM:NM_017864,RSN_HUM:NR_073444;RSN_HUM:NR_073445	0.979908	0.0012791	0.753538	0.000433333	0.0012791	0.22637
ZNF655	79027	17	XCASSETTE	RSN_HUM:NM_138494,RSN_HUM:NM_001009960;RSN_HUM:XM_005250577,RSN_HUM:XM_005250578	0.314915	0.00146833	0.0886131	0.00193369	0.00193369	0.226302
ZNF410	57862	2	CASSETTE	RSN_HUM:NM_001242926;RSN_HUM:NM_001242924,RSN_HUM:NM_001242927,RSN_HUM:NM_001242928,RSN_HUM:NM_021188,RSN_HUM:NR_040251	0.296197	0.00277316	0.0700223	0.00347461	0.00347461	0.226175
USO1	8615	2	CASSETTE	RSN_HUM:NM_003715;RSN_HUM:NM_001290049	0.995372	0.0405684	0.769275	0.0176908	0.0405684	0.226097
ARFIP1	27236	2	CASSETTE	RSN_HUM:NM_001287433,RSN_HUM:NM_014447,RSN_HUM:NM_001025593;RSN_HUM:NM_001287431,RSN_HUM:NM_001025595,RSN_HUM:NM_001287432	0.295062	0.0023508	0.0690949	0.00136768	0.0023508	0.225967
DMTF1	9988	1	CASSETTE	RSN_HUM:NM_001142326;RSN_HUM:NM_001142327,RSN_HUM:NR_024549,RSN_HUM:NR_024550,RSN_HUM:NM_021145,RSN_HUM:XM_005250734	0.290539	0.0011193	0.0648424	0.00142499	0.00142499	0.225697
IKZF5	64376	9	LCASSETTE	RSN_HUM:NR_073478;RSN_HUM:NR_073479	0.244079	0.000209768	0.0188082	0.00133984	0.00133984	0.225271
BRCC3	79184	2	CASSETTE	RSN_HUM:NM_001018055,RSN_HUM:NM_001242640;RSN_HUM:NM_024332	0.853045	0.0023218	0.627852	0.0015604	0.0023218	0.225193
NKIRAS2	28511	2	INTERNAL5	RSN_HUM:NM_001001349,RSN_HUM:NM_017595,RSN_HUM:XM_005257251;RSN_HUM:NM_001144928	0.868481	0.00241106	0.643292	0.0029262	0.0029262	0.225189
TRPT1	83707	5	CASSETTE	RSN_HUM:NM_031472;RSN_HUM:NM_001033678,RSN_HUM:NM_001160389,RSN_HUM:NM_001160392	0.559217	0.00162602	0.784329	0.00087476	0.00162602	0.225112
MFF	56947	43	MUT_EXCLU	RSN_HUM:XM_005246681;RSN_HUM:XM_005246685	0.258404	0.00215002	0.48343	0.0013814	0.00215002	0.225026
ATXN2L	11273	38	CASSETTE	RSN_HUM:NM_148415,RSN_HUM:XM_005255074,RSN_HUM:XM_005255076;RSN_HUM:XM_005255068	0.70468	0.0015688	0.479869	0.00141872	0.0015688	0.224811
CPSF3L	54973	5	CASSETTE	RSN_HUM:NM_001256463,RSN_HUM:NM_017871;RSN_HUM:NM_001256460	0.981456	0.00219406	0.756706	0.00228592	0.00228592	0.22475
NUP50	10762	2	CASSETTE	RSN_HUM:NM_007172;RSN_HUM:XM_005261314	0.971994	0.00191369	0.747326	0.00235372	0.00235372	0.224668
REV3L	5980	6	CASSETTE	RSN_HUM:NM_002912;RSN_HUM:NM_001286432	0.59194	0.00121566	0.367737	0.000304837	0.00121566	0.224203
PPHLN1	51535	2	CASSETTE	RSN_HUM:NM_001143788,RSN_HUM:NM_001143789,RSN_HUM:XM_005268962,RSN_HUM:XM_005268966,RSN_HUM:XM_005268964;RSN_HUM:NM_001143787,RSN_HUM:NM_016488,RSN_HUM:NM_201438,RSN_HUM:NM_201439,RSN_HUM:NM_201440,RSN_HUM:NM_201515,RSN_HUM:XM_005268965	0.328353	0.00443182	0.552285	0.00272334	0.00443182	0.223932
CA12	771	1	CASSETTE	RSN_HUM:NM_206925;RSN_HUM:NM_001218	0.939732	0.0040851	0.716253	0.00252937	0.0040851	0.223479
ZBTB43	23099	1	CASSETTE	RSN_HUM:NM_001135776;RSN_HUM:NM_014007	0.252691	0.000462224	0.02929	0.0018846	0.0018846	0.223401
VPS29	51699	2	LCASSETTE	RSN_HUM:NM_001282151,RSN_HUM:NM_016226;RSN_HUM:NM_001282150	0.804556	0.00361212	0.581362	0.00068899	0.00361212	0.223194
MARK3	4140	7	CASSETTE	RSN_HUM:NM_001128920,RSN_HUM:NM_002376;RSN_HUM:NM_001128919	0.300642	0.00113823	0.077503	0.00198057	0.00198057	0.223139
MORF4L2	9643	15	CASSETTE	RSN_HUM:NM_001142420,RSN_HUM:NM_001142426;RSN_HUM:NM_001142430,RSN_HUM:NM_001142431	0.236617	0.00118546	0.0136804	0.00417384	0.00417384	0.222937
MYO6	4646	7	CASSETTE	RSN_HUM:XM_005248725,RSN_HUM:XM_005248726;RSN_HUM:XM_005248724	0.985276	0.00136057	0.762363	0.00040545	0.00136057	0.222913
AURKA	6790	1	LCASSETTE	RSN_HUM:NM_003600;RSN_HUM:NM_198433	0.37125	0.0014198	0.148439	0.000226355	0.0014198	0.222811
CTBP2	1488	19	CASSETTE	RSN_HUM:NM_001290214,RSN_HUM:XM_005269570;RSN_HUM:XM_005269564	0.0836502	0.00114007	0.306449	0.00102812	0.00114007	0.222799
ENTPD4	9583	1	INTERNAL5	RSN_HUM:NM_001128930;RSN_HUM:NM_004901	0.109366	0.0026809	0.332016	0.0007087	0.0026809	0.22265
LRRFIP1	9208	67	XCASSETTE	RSN_HUM:XM_005246130,RSN_HUM:NM_001137552,RSN_HUM:NM_004735;RSN_HUM:XM_005246115	0.965352	0.000918633	0.742958	0.00208322	0.00208322	0.222394
RNF146	81847	13	CASSETTE	RSN_HUM:NR_045102,RSN_HUM:NR_045103;RSN_HUM:NM_001242852	0.984989	0.00090265	0.762645	0.00252765	0.00252765	0.222344
CCDC50	152137	1	CASSETTE	RSN_HUM:NM_174908;RSN_HUM:NM_178335	0.99301	0.00501687	0.77069	0.00205699	0.00501687	0.22232
ADNP	23394	6	CASSETTE	RSN_HUM:NM_181442;RSN_HUM:NM_015339	0.246015	0.00103937	0.0239185	0.000610405	0.00103937	0.222097
ASCC1	51008	2	LCASSETTE	RSN_HUM:NM_001198798,RSN_HUM:NM_001198800,RSN_HUM:NR_045564;RSN_HUM:NM_001198799	0.89806	0.00169365	0.676	0.000695586	0.00169365	0.22206
ODF2L	57489	6	CASSETTE	RSN_HUM:NM_001007022;RSN_HUM:NM_020729	0.937231	0.0013016	0.715472	0.00056005	0.0013016	0.221759
MCAT	27349	1	CASSETTE	RSN_HUM:NM_014507,RSN_HUM:NR_046423;RSN_HUM:NM_173467	0.265917	0.00138652	0.487615	0.00124688	0.00138652	0.221698
NUP35	129401	3	CASSETTE	RSN_HUM:NM_001287584,RSN_HUM:XM_005246284,RSN_HUM:NM_138285,RSN_HUM:NR_109856;RSN_HUM:NM_001287585	0.991328	0.00107245	0.770113	0.00081975	0.00107245	0.221215
RNF146	81847	2	LCASSETTE	RSN_HUM:NM_001242851,RSN_HUM:NM_001242849,RSN_HUM:NM_001242850;RSN_HUM:NM_001242844,RSN_HUM:NM_030963,RSN_HUM:NM_001242845	0.675411	0.00185142	0.45421	0.00503534	0.00503534	0.221201
PRMT7	54496	3	XCASSETTE	RSN_HUM:XM_005255991;RSN_HUM:NM_001184824,RSN_HUM:NM_019023,RSN_HUM:XM_005255988,RSN_HUM:XM_005255992,RSN_HUM:XM_005255989,RSN_HUM:XM_005255993,RSN_HUM:NM_001290018	0.331314	0.00223383	0.110523	0.00142957	0.00223383	0.220791
RAD17	5884	15	LCASSETTE	RSN_HUM:NM_133340;RSN_HUM:NM_133338	0.651373	0.00157322	0.430589	0.00172078	0.00172078	0.220784
CLK2	1196	4	CASSETTE	RSN_HUM:XM_005244879;RSN_HUM:XM_005244876	0.263458	0.000865034	0.0431091	0.00178848	0.00178848	0.220349
TRAPPC13	80006	1	CASSETTE	RSN_HUM:NM_001093756,RSN_HUM:NM_001243737;RSN_HUM:NM_001093755,RSN_HUM:NM_024941	0.2896	0.00106975	0.0692657	0.0002642	0.00106975	0.220334
DPM1	8813	2	CASSETTE	RSN_HUM:NM_003859;RSN_HUM:XM_005260600	0.959203	0.0074074	0.738999	0.0109259	0.0109259	0.220204
EIF4E2	9470	2	CASSETTE	RSN_HUM:XM_005246975,RSN_HUM:NM_001276337;RSN_HUM:NM_001276336,RSN_HUM:NM_001282958,RSN_HUM:NM_004846	0.793946	0.0390535	0.574559	0.00898676	0.0390535	0.219387
SLC7A6	9057	1	CASSETTE	RSN_HUM:NM_003983;RSN_HUM:NM_001076785	0.620128	0.0011904	0.400817	0.000643086	0.0011904	0.219311
MFF	56947	17	MUT_EXCLU	RSN_HUM:NM_001277062,RSN_HUM:XM_005246682;RSN_HUM:XM_005246685	0.754449	0.00263168	0.535478	0.00143017	0.00263168	0.218971
RTN3	10313	9	MUT_EXCLU	RSN_HUM:NM_001265590;RSN_HUM:NM_201429	0.613008	0.000405352	0.394043	0.00291673	0.00291673	0.218965
MEG3	55384	57	CASSETTE	RSN_HUM:NR_046471;RSN_HUM:NR_046472	0.432386	0.000657978	0.213489	0.00104876	0.00104876	0.218897
BAZ1A	11177	1	CASSETTE	RSN_HUM:NM_182648;RSN_HUM:NM_013448	0.218627	0.00118055	0	0.00088435	0.00118055	0.218627
FAM208A	23272	1	INTERNAL3	RSN_HUM:NM_015224;RSN_HUM:XM_005264999,RSN_HUM:NM_001112736	0.358777	0.0021158	0.140183	0.0016721	0.0021158	0.218594
MEG3	55384	39	MUT_EXCLU	RSN_HUM:NR_033360;RSN_HUM:NR_046469	0.233673	0.00230903	0.452251	0.00323065	0.00323065	0.218578
RBM42	79171	2	CASSETTE	RSN_HUM:XM_005259258;RSN_HUM:XM_005259257	0.64683	0.00374643	0.428337	0.00202668	0.00374643	0.218493
AKT1	207	1	CASSETTE	RSN_HUM:NM_001014431;RSN_HUM:NM_001014432	0.735435	0.00113497	0.51703	0.0008162	0.00113497	0.218405
GYG1	2992	2	CASSETTE	RSN_HUM:NM_001184720;RSN_HUM:NM_004130	0.98423	0.00687075	0.765863	0.00307235	0.00687075	0.218367
RTN3	10313	15	MUT_EXCLU	RSN_HUM:NM_201428;RSN_HUM:NM_201429	0.609331	0.000401537	0.391329	0.00290372	0.00290372	0.218002
EXTL2	2135	3	CASSETTE	RSN_HUM:NM_001261442;RSN_HUM:NM_001033025,RSN_HUM:NM_001261441,RSN_HUM:NM_001439,RSN_HUM:NR_048570	0.0529213	0.00191794	0.270844	0.000986178	0.00191794	0.217923
GGNBP2	79893	1	INTERNAL5	RSN_HUM:NM_024835;RSN_HUM:XM_005257689	0.647423	0.0034713	0.865072	0.0041689	0.0041689	0.217649
TERF1	7013	2	CASSETTE	RSN_HUM:NM_003218,RSN_HUM:NM_017489;RSN_HUM:XM_005251291,RSN_HUM:XM_005251292	0.998652	0.0017063	0.781369	0.000713875	0.0017063	0.217283
BAG4	9530	1	CASSETTE	RSN_HUM:NM_001204878;RSN_HUM:NM_004874	0.285546	0.0009333	0.0685501	0.00107075	0.00107075	0.216996
NT5C3A	51251	3	CASSETTE	RSN_HUM:NM_001002009,RSN_HUM:NM_016489;RSN_HUM:NM_001166118	0.951943	0.0013276	0.73524	0.00454619	0.00454619	0.216703
WDR4	10785	2	INTERNAL5	RSN_HUM:NM_033661,RSN_HUM:NM_001260474,RSN_HUM:NM_018669,RSN_HUM:NR_048535;RSN_HUM:NM_001260475,RSN_HUM:NM_001260476,RSN_HUM:NM_001260477	0.820949	0.00124731	0.604442	0.000578087	0.00124731	0.216507
ECI2	10455	3	INTERNAL3	RSN_HUM:NM_006117,RSN_HUM:NR_028588;RSN_HUM:NM_206836	0.587766	0.00632105	0.804263	0.0018295	0.00632105	0.216497
ERBB2IP	55914	2	CASSETTE	RSN_HUM:NM_001006600;RSN_HUM:NM_001253698,RSN_HUM:NM_001253701,RSN_HUM:NM_018695	0.574801	0.00673189	0.35851	0.00172101	0.00673189	0.216291
TMEM189	387521	2	CASSETTE	RSN_HUM:NM_001162505,RSN_HUM:NM_199129;RSN_HUM:NR_027889	0.912955	0.00223103	0.697151	0.00314447	0.00314447	0.215804
YWHAB	7529	1	CASSETTE	RSN_HUM:NM_139323;RSN_HUM:NM_003404	0.85194	0.0197713	0.636374	0.00846684	0.0197713	0.215566
CGGBP1	8545	2	CASSETTE	RSN_HUM:NM_001195308,RSN_HUM:NM_003663;RSN_HUM:NM_001008390	0.851431	0.00476478	0.635958	0.0094449	0.0094449	0.215473
MARK2	2011	2	CASSETTE	RSN_HUM:NM_001163296;RSN_HUM:NM_001039469	0.686844	0.00156469	0.471708	0.00318375	0.00318375	0.215136
ARHGAP22	58504	2	INTERNAL5	RSN_HUM:NM_001256024;RSN_HUM:NM_001256025,RSN_HUM:NM_021226,RSN_HUM:NR_045675	0.316392	0.00124229	0.101542	0.00215429	0.00215429	0.21485
NKIRAS2	28511	7	CASSETTE	RSN_HUM:NM_001144928;RSN_HUM:NM_001144929	0.21753	0.00145773	0.432215	0.002415	0.002415	0.214685
MORF4L2	9643	18	MUT_EXCLU	RSN_HUM:NM_001142421,RSN_HUM:NM_001142423;RSN_HUM:NM_001142430,RSN_HUM:NM_001142431	0.912688	0.0148918	0.698021	0.019587	0.019587	0.214667
RNF111	54778	6	INTERNAL3	RSN_HUM:NM_001270528,RSN_HUM:NM_001270529,RSN_HUM:NM_017610;RSN_HUM:NM_001270530	0.681676	0.00151802	0.896166	0.00195697	0.00195697	0.21449
TRRAP	8295	1	CASSETTE	RSN_HUM:NM_003496;RSN_HUM:NM_001244580	0.967972	0.0010116	0.753577	0.0004403	0.0010116	0.214395
NAE1	8883	3	CASSETTE	RSN_HUM:NM_003905;RSN_HUM:NM_001018159	0.890823	0.00257885	0.676438	0.0013713	0.00257885	0.214385
MYO1B	4430	6	CASSETTE	RSN_HUM:NM_012223,RSN_HUM:XM_005246577;RSN_HUM:XM_005246575	0.577326	0.0117784	0.363185	0.00493054	0.0117784	0.214141
FAM114A1	92689	1	LCASSETTE	RSN_HUM:NR_033290;RSN_HUM:NM_138389	0.0708001	0.00608756	0.284776	0.00579966	0.00608756	0.213976
ADD1	118	2	CASSETTE	RSN_HUM:XM_005247933,RSN_HUM:XM_005247935,RSN_HUM:NM_001119,RSN_HUM:NM_014189,RSN_HUM:XM_005247934;RSN_HUM:XM_005247936,RSN_HUM:NM_014190,RSN_HUM:NM_176801,RSN_HUM:NM_001286645	0.941399	0.0134225	0.727478	0.0109788	0.0134225	0.213921
ADIPOR1	51094	5	CASSETTE	RSN_HUM:NM_015999;RSN_HUM:NM_001290557	0.987193	0.0042087	0.773272	0.00665302	0.00665302	0.213921
GGCT	79017	10	CASSETTE	RSN_HUM:NR_037669;RSN_HUM:NM_024051	0.322859	0.00211919	0.109267	0.00199419	0.00211919	0.213592
MEG3	55384	37	MUT_M_EXCLU	RSN_HUM:NR_033360;RSN_HUM:NR_046464	0.418401	0.00128957	0.631964	0.00231194	0.00231194	0.213563
MOB1B	92597	3	CASSETTE	RSN_HUM:NM_001244767,RSN_HUM:NM_173468;RSN_HUM:NM_001244766	0.896615	0.00111163	0.683188	0.00056895	0.00111163	0.213427
ANO6	196527	2	CASSETTE	RSN_HUM:NM_001025356,RSN_HUM:NM_001142679;RSN_HUM:NM_001204803	0.813303	0.00314815	0.600168	0.0040452	0.0040452	0.213135
RAPGEF2	9693	1	CASSETTE	RSN_HUM:XM_005263359;RSN_HUM:XM_005263358,RSN_HUM:XM_005263360,RSN_HUM:XM_005263361,RSN_HUM:NM_014247	0.283858	0.0008388	0.0711274	0.00117395	0.00117395	0.212731
PLSCR1	5359	1	CASSETTE	RSN_HUM:XM_005247538;RSN_HUM:NM_021105	0.0998471	0.0015674	0.312503	0.000845432	0.0015674	0.212656
EPB41L3	23136	3	CASSETTE	RSN_HUM:NM_001281534,RSN_HUM:NM_001281535,RSN_HUM:XM_005258089,RSN_HUM:XM_005258090,RSN_HUM:XM_005258091;RSN_HUM:NM_001281533,RSN_HUM:NM_012307,RSN_HUM:XM_005258086,RSN_HUM:XM_005258087,RSN_HUM:XM_005258088	0.980556	0.00420474	0.768041	0.00296448	0.00420474	0.212515
KRAS	3845	1	CASSETTE	RSN_HUM:NM_004985;RSN_HUM:NM_033360	0.962632	0.0029303	0.750133	0.001129	0.0029303	0.212499
VEGFA	7422	18	MUT_EXCLU	RSN_HUM:NM_001025368,RSN_HUM:NM_001171626,RSN_HUM:NM_001287044;RSN_HUM:NM_001204384,RSN_HUM:NM_001204385	0.863062	0.00166892	0.650756	0.00234494	0.00234494	0.212306
AUH	549	10	XCASSETTE	RSN_HUM:XM_005252071;RSN_HUM:XM_005252066	0.49657	0.00141229	0.284307	0.000319373	0.00141229	0.212263
MLLT10	8028	17	INTERNAL3	RSN_HUM:NM_004641;RSN_HUM:XM_005252606,RSN_HUM:XM_005252605,RSN_HUM:XM_005252608,RSN_HUM:XM_005252609,RSN_HUM:XM_005252610,RSN_HUM:NM_001195626,RSN_HUM:XM_005252611	0.0772511	0.0012427	0.289389	0.0005287	0.0012427	0.212138
CEP78	84131	2	CASSETTE	RSN_HUM:XM_005252265;RSN_HUM:XM_005252263	0.537674	0.00155596	0.325915	0.00034825	0.00155596	0.211759
CEP78	84131	7	CASSETTE	RSN_HUM:NM_032171;RSN_HUM:NM_001098802	0.537674	0.00155596	0.325915	0.00034825	0.00155596	0.211759
TLE3	7090	11	INTERNAL5	RSN_HUM:NM_001282980;RSN_HUM:NM_005078	0.487285	0.000982152	0.275574	0.00112311	0.00112311	0.211711
TLE3	7090	16	INTERNAL5	RSN_HUM:NM_001282982,RSN_HUM:XM_005254628,RSN_HUM:XM_005254633;RSN_HUM:NM_020908,RSN_HUM:XM_005254625	0.487285	0.000982152	0.275574	0.00112311	0.00112311	0.211711
TLE3	7090	1	INTERNAL5	RSN_HUM:NM_001105192,RSN_HUM:NM_001282981,RSN_HUM:XM_005254622;RSN_HUM:NM_001282979,RSN_HUM:XM_005254623	0.512715	0.000982152	0.724426	0.00112311	0.00112311	0.211711
DYNC1I2	1781	12	CASSETTE	RSN_HUM:NM_001271788,RSN_HUM:NM_001271790,RSN_HUM:NM_001271789,RSN_HUM:XM_005246369;RSN_HUM:NM_001378,RSN_HUM:XM_005246367,RSN_HUM:NM_001271785,RSN_HUM:XM_005246366	0.995884	0.0100365	0.784656	0.00130752	0.0100365	0.211228
DYNC1I2	1781	4	CASSETTE	RSN_HUM:NM_001271786,RSN_HUM:NM_001271787;RSN_HUM:XM_005246364,RSN_HUM:XM_005246365,RSN_HUM:XM_005246363	0.995884	0.0100365	0.784656	0.00130752	0.0100365	0.211228
ZNF706	51123	5	LCASSETTE	RSN_HUM:NM_016096;RSN_HUM:NM_001267708	0.976082	0.00689716	0.76521	0.0064261	0.00689716	0.210872
GPANK1	7918	2	INTERNAL3	RSN_HUM:NM_001199237,RSN_HUM:NM_001199239;RSN_HUM:NM_001199238,RSN_HUM:NM_001199240	0.4524	0.00108068	0.24154	0.000811223	0.00108068	0.21086
PRMT2	3275	19	CASSETTE	RSN_HUM:NM_001286678;RSN_HUM:NM_001286677	0.393012	0.00437646	0.182221	0.00513772	0.00513772	0.210791
PLAGL1	5325	58	MUT_EXCLU	RSN_HUM:NM_001080956,RSN_HUM:NM_001289040;RSN_HUM:NM_001289042	0.274801	0.00195147	0.484954	0.00131664	0.00195147	0.210153
PUM2	23369	2	CASSETTE	RSN_HUM:NM_001282790,RSN_HUM:NM_001282791,RSN_HUM:XM_005262609,RSN_HUM:XM_005262610;RSN_HUM:NM_001282752,RSN_HUM:NM_015317,RSN_HUM:XM_005262607	0.25302	0.00346375	0.0429354	0.00304644	0.00346375	0.210085
UBE2G2	7327	3	CASSETTE	RSN_HUM:NM_003343;RSN_HUM:NM_182688	0.97843	0.0030876	0.768508	0.0018722	0.0030876	0.209922
MEF2BNB-MEF2B	4207	2	LCASSETTE	RSN_HUM:NM_005919;RSN_HUM:NR_027307,RSN_HUM:NR_027308	0.168088	0.00197634	0.377968	0.00171469	0.00197634	0.20988
CLCN3	1182	2	CASSETTE	RSN_HUM:NM_001243372,RSN_HUM:NM_001829,RSN_HUM:NM_001243374;RSN_HUM:NM_173872,RSN_HUM:XM_005262726	0.926361	0.00198605	0.716558	0.0022128	0.0022128	0.209803
HPS4	89781	3	CASSETTE	RSN_HUM:NM_022081,RSN_HUM:NM_152841,RSN_HUM:NR_073135;RSN_HUM:NR_073136	0.833223	0.00123898	0.623961	0.000894928	0.00123898	0.209262
PRMT2	3275	18	XCASSETTE	RSN_HUM:NM_001286676;RSN_HUM:NM_001535,RSN_HUM:NM_206962,RSN_HUM:XM_005261111	0.313865	0.00491835	0.104608	0.00783212	0.00783212	0.209257
PXK	54899	10	CASSETTE	RSN_HUM:NM_001289096,RSN_HUM:NM_001289099,RSN_HUM:NM_001289101,RSN_HUM:NM_017771;RSN_HUM:NM_001289098,RSN_HUM:NM_001289100	0.982773	0.00281969	0.773672	0.00102472	0.00281969	0.209101
USP8	9101	2	CASSETTE	RSN_HUM:NM_001283049;RSN_HUM:NM_005154,RSN_HUM:NM_001128610	0.44375	0.0028951	0.234675	0.0012153	0.0028951	0.209075
MBD1	4152	16	CASSETTE	RSN_HUM:NM_001204143,RSN_HUM:NM_002384,RSN_HUM:NM_015844,RSN_HUM:NM_001204140,RSN_HUM:XM_005258272,RSN_HUM:XM_005258274;RSN_HUM:NM_001204141	0.535346	0.00149804	0.326495	0.00188056	0.00188056	0.208851
N4BP2L2	10443	3	INTERNAL5	RSN_HUM:NM_001278432;RSN_HUM:XM_005266223	0.108445	0.00203006	0.317198	0.00114061	0.00203006	0.208753
OSBPL9	114883	8	MUT_EXCLU	RSN_HUM:NM_148906;RSN_HUM:NR_036662	0.419218	0.00210927	0.210499	0.00072186	0.00210927	0.208719
HDAC7	51564	1	CASSETTE	RSN_HUM:NM_001098416;RSN_HUM:NM_015401,RSN_HUM:XM_005268968	0.514742	0.00375114	0.306364	0.00146264	0.00375114	0.208378
SSBP1	6742	1	CASSETTE	RSN_HUM:NM_003143,RSN_HUM:NM_001256513,RSN_HUM:NM_001256512,RSN_HUM:NM_001256511,RSN_HUM:XM_005250049,RSN_HUM:XM_005250048,RSN_HUM:XM_005250050,RSN_HUM:XM_005250051,RSN_HUM:NM_001256510;RSN_HUM:NR_046269	0.981417	0.00703587	0.77328	0.00309457	0.00703587	0.208137
TPRKB	51002	2	CASSETTE	RSN_HUM:NM_016058;RSN_HUM:XM_005264343	0.794697	0.00343168	0.586674	0.00241488	0.00343168	0.208023
HECTD1	25831	1	INTERNAL3	RSN_HUM:XM_005267502,RSN_HUM:NM_015382;RSN_HUM:XM_005267503	0.486281	0.0034295	0.694156	0.001694	0.0034295	0.207875
HERC4	26091	3	CASSETTE	RSN_HUM:NM_001278186;RSN_HUM:NM_001278185,RSN_HUM:NM_015601,RSN_HUM:NM_022079	0.349036	0.0104078	0.55685	0.002	0.0104078	0.207814
NUP54	53371	5	LCASSETTE	RSN_HUM:NM_001278603,RSN_HUM:NM_017426,RSN_HUM:NR_103780,RSN_HUM:NR_103781;RSN_HUM:NR_103782	0.994072	0.00185009	0.786293	0.00186521	0.00186521	0.207779
CREM	1390	24	LCASSETTE	RSN_HUM:NR_051973,RSN_HUM:NR_051974;RSN_HUM:NM_001267563	0.320495	0.000589712	0.112791	0.00112243	0.00112243	0.207704
ERBB2IP	55914	8	CASSETTE	RSN_HUM:NM_001253698,RSN_HUM:NM_001253701,RSN_HUM:NM_018695;RSN_HUM:NM_001253697	0.96701	0.00302665	0.759324	0.00111353	0.00302665	0.207686
MCU	90550	2	LCASSETTE	RSN_HUM:NM_001270679,RSN_HUM:NM_138357;RSN_HUM:NR_073062	0.965876	0.00157386	0.758436	0.000306552	0.00157386	0.20744
KIF23	9493	4	CASSETTE	RSN_HUM:NM_001281301,RSN_HUM:NM_004856,RSN_HUM:NM_138555;RSN_HUM:XM_005254796,RSN_HUM:XM_005254797,RSN_HUM:XM_005254798,RSN_HUM:XM_005254799	0.214586	0.00372822	0.00722733	0.0021308	0.00372822	0.207359
NPRL2	10641	2	INTERNAL3	RSN_HUM:XM_005264808;RSN_HUM:NM_006545	0.0311671	0.000997848	0.238382	0.00108775	0.00108775	0.207215
PPP3CC	5533	2	CASSETTE	RSN_HUM:NM_001243975;RSN_HUM:NM_001243974,RSN_HUM:NM_005605	0.853726	0.00156151	0.646549	0.00122952	0.00156151	0.207177
ACP1	52	4	CASSETTE	RSN_HUM:NM_007099;RSN_HUM:NR_024080	0.35777	0.00520166	0.56479	0.00795708	0.00795708	0.20702
YTHDF3	253943	9	CASSETTE	RSN_HUM:NM_152758,RSN_HUM:NR_102434,RSN_HUM:NM_001277817,RSN_HUM:NM_001277818;RSN_HUM:NM_001277815	0.949428	0.00147315	0.74243	0.0013903	0.00147315	0.206998
KLHL24	54800	11	MUT_EXCLU	RSN_HUM:NM_017644;RSN_HUM:XM_005247555	0.882796	0.000315264	0.675929	0.00134894	0.00134894	0.206867
CEP170	9859	2	CASSETTE	RSN_HUM:NM_001042404,RSN_HUM:NM_001042405;RSN_HUM:NM_014812	0.329619	0.00248044	0.536383	0.00125153	0.00248044	0.206764
DIABLO	56616	12	MUT_M_EXCLU	RSN_HUM:NM_001278342;RSN_HUM:NM_138930	0.499201	0.00202082	0.292578	0.00495288	0.00495288	0.206623
NQO2	4835	8	CASSETTE	RSN_HUM:XM_005249150;RSN_HUM:NM_001290221,RSN_HUM:XM_005249149	0.919191	0.00125578	0.712601	0.0014064	0.0014064	0.20659
HERC4	26091	4	CASSETTE	RSN_HUM:NM_001278186;RSN_HUM:NM_001278185,RSN_HUM:NM_015601,RSN_HUM:NM_022079	0.283886	0.0139936	0.490313	0.00238154	0.0139936	0.206427
TRA2A	29896	4	CASSETTE	RSN_HUM:NM_013293;RSN_HUM:NM_001282757	0.969792	0.00792469	0.763851	0.00794239	0.00794239	0.205941
SDCCAG3	10807	2	CASSETTE	RSN_HUM:NM_006643;RSN_HUM:NM_001039707,RSN_HUM:XM_005266050	0.654532	0.000727084	0.448911	0.00157715	0.00157715	0.205621
RHBDD1	84236	4	LCASSETTE	RSN_HUM:NM_032276;RSN_HUM:NM_001167608	0.527567	0.00107635	0.322423	0.00118664	0.00118664	0.205144
RPS6KC1	26750	5	LCASSETTE	RSN_HUM:NM_001287220;RSN_HUM:NM_001136138,RSN_HUM:NM_001287221,RSN_HUM:NM_012424	0.403511	0.00220192	0.608223	0.000516751	0.00220192	0.204712
TMEM131	23505	1	CASSETTE	RSN_HUM:NM_015348,RSN_HUM:XM_005263912;RSN_HUM:XM_005263909,RSN_HUM:XM_005263910,RSN_HUM:XM_005263911	0.988389	0.0017613	0.783943	0.00218287	0.00218287	0.204446
SLMAP	7871	20	MUT_M_EXCLU	RSN_HUM:XM_005265460,RSN_HUM:XM_005265465,RSN_HUM:XM_005265466,RSN_HUM:NM_007159;RSN_HUM:XM_005265467,RSN_HUM:XM_005265472,RSN_HUM:XM_005265462,RSN_HUM:XM_005265463,RSN_HUM:XM_005265464	0.234491	0.00100372	0.438583	0.000314404	0.00100372	0.204092
DNM1L	10059	8	CASSETTE	RSN_HUM:NM_012063;RSN_HUM:NM_001278464,RSN_HUM:NM_001278466,RSN_HUM:NM_012062,RSN_HUM:XM_005253283	0.491065	0.00135338	0.28706	0.000920016	0.00135338	0.204005
MAGOHB	55110	1	CASSETTE	RSN_HUM:NM_018048;RSN_HUM:XM_005253402	0.958598	0.00522401	0.754619	0.00212756	0.00522401	0.203979
DLGAP4	22839	7	CASSETTE	RSN_HUM:XM_005260329,RSN_HUM:NM_001042486,RSN_HUM:NM_183006;RSN_HUM:XM_005260333	0.991621	0.00691575	0.787827	0.00590805	0.00691575	0.203794
RPAIN	84268	23	MUT_EXCLU	RSN_HUM:NM_001160266;RSN_HUM:NR_027684	0.539222	0.000956469	0.742912	0.00121613	0.00121613	0.20369
NFYB	4801	1	CASSETTE	RSN_HUM:NM_006166;RSN_HUM:XM_005268908,RSN_HUM:XM_005268909,RSN_HUM:XM_005268910	0.966299	0.00295343	0.762659	0.00208638	0.00295343	0.20364
MTMR2	8898	1	LCASSETTE	RSN_HUM:NM_016156,RSN_HUM:NM_201281;RSN_HUM:NM_001243571	0.872332	0.00291578	0.668863	0.00168709	0.00291578	0.203469
TMEM11	8834	1	CASSETTE	RSN_HUM:NM_003876;RSN_HUM:NR_024547	0.641113	0.00242172	0.438061	0.00238597	0.00242172	0.203052
HELQ	113510	1	CASSETTE	RSN_HUM:XM_005262716;RSN_HUM:NM_133636,RSN_HUM:XM_005262711,RSN_HUM:XM_005262712,RSN_HUM:XM_005262713,RSN_HUM:XM_005262714	0.827193	0.00112042	0.624162	0.000308093	0.00112042	0.203031
MBNL2	10150	6	CASSETTE	RSN_HUM:XM_005254019,RSN_HUM:NM_207304;RSN_HUM:XM_005254021,RSN_HUM:XM_005254022	0.605369	0.00310496	0.402395	0.00218318	0.00310496	0.202974
LRRFIP1	9208	14	XCASSETTE	RSN_HUM:XM_005246130,RSN_HUM:NM_001137552,RSN_HUM:NM_004735;RSN_HUM:NM_001137550,RSN_HUM:XM_005246116	0.962925	0.000920948	0.76012	0.00203618	0.00203618	0.202805
ZNF542P	147947	7	CASSETTE	RSN_HUM:NR_024055,RSN_HUM:NR_024057;RSN_HUM:NR_033418	0.743438	0.00100298	0.540994	0.000833561	0.00100298	0.202444
LRRFIP1	9208	4	CASSETTE	RSN_HUM:XM_005246128,RSN_HUM:XM_005246140,RSN_HUM:XM_005246134,RSN_HUM:XM_005246136,RSN_HUM:XM_005246142,RSN_HUM:XM_005246117,RSN_HUM:XM_005246127,RSN_HUM:XM_005246129,RSN_HUM:XM_005246135,RSN_HUM:NM_001137551,RSN_HUM:NM_001137553,RSN_HUM:NM_004735;RSN_HUM:NM_001137550,RSN_HUM:XM_005246137,RSN_HUM:XM_005246139,RSN_HUM:XM_005246138,RSN_HUM:XM_005246112,RSN_HUM:XM_005246114,RSN_HUM:XM_005246115,RSN…	0.927212	0.0097829	0.724858	0.0105851	0.0105851	0.202354
UFM1	51569	2	CASSETTE	RSN_HUM:NM_001286703,RSN_HUM:NM_001286704,RSN_HUM:NM_016617,RSN_HUM:NR_104584,RSN_HUM:NR_104585;RSN_HUM:NM_001286705	0.953142	0.00324439	0.750985	0.00323304	0.00324439	0.202157
SCOC	60592	8	CASSETTE	RSN_HUM:NM_001153690,RSN_HUM:NM_001153552;RSN_HUM:NM_001153635,RSN_HUM:NM_001153663	0.24443	0.00246914	0.0426072	0.00452506	0.00452506	0.201823
MEG3	55384	35	MUT_EXCLU	RSN_HUM:NR_033359;RSN_HUM:NR_046470	0.238659	0.000390252	0.440465	0.00158464	0.00158464	0.201806
PXN	5829	13	XCASSETTE	RSN_HUM:NM_002859,RSN_HUM:NM_025157,RSN_HUM:XM_005253916;RSN_HUM:XM_005253910	0.945644	0.00673818	0.743994	0.00384466	0.00673818	0.20165
CTBP2	1488	15	MUT_EXCLU	RSN_HUM:NM_001290214;RSN_HUM:NM_001329	0.0528731	0.00173999	0.254419	0.00114944	0.00173999	0.201546
RNF146	81847	14	MUT_EXCLU	RSN_HUM:NM_001242852;RSN_HUM:NM_001242846	0.0871687	0.000181595	0.288606	0.00242848	0.00242848	0.201437
MELK	9833	4	CASSETTE	RSN_HUM:NM_001256689,RSN_HUM:NM_001256691,RSN_HUM:NR_046337;RSN_HUM:NM_001256685,RSN_HUM:NM_001256687,RSN_HUM:NM_001256688,RSN_HUM:NM_014791	0.322029	0.00229265	0.121317	0.000820717	0.00229265	0.200712
ECT2	1894	2	CASSETTE	RSN_HUM:NM_001258315,RSN_HUM:NM_001258316,RSN_HUM:NM_018098;RSN_HUM:XM_005247176,RSN_HUM:XM_005247180	0.971935	0.00423012	0.771229	0.000611492	0.00423012	0.200706
CREM	1390	8	XCASSETTE	RSN_HUM:NR_051975;RSN_HUM:NM_001267562	0.39557	0.00037288	0.195285	0.00115933	0.00115933	0.200285
VPS39	23339	1	CASSETTE	RSN_HUM:NM_015289;RSN_HUM:XM_005254259	0.99808	0.00609285	0.797854	0.006059	0.00609285	0.200226
UBA3	9039	1	CASSETTE	RSN_HUM:NM_198195;RSN_HUM:NM_003968	0.153297	0.0027313	0.353498	0.00267215	0.0027313	0.200201
PCNT	5116	8	INTERNAL5	RSN_HUM:XM_005261127,RSN_HUM:XM_005261124,RSN_HUM:XM_005261125,RSN_HUM:NM_006031,RSN_HUM:XM_005261128;RSN_HUM:XM_005261126,RSN_HUM:XM_005261129	0.555132	0.0010756	0.355019	0.0010191	0.0010756	0.200113
STRN3	29966	5	CASSETTE	RSN_HUM:NM_014574;RSN_HUM:XM_005267570	0.905372	0.00138595	0.705419	0.0004318	0.00138595	0.199953
PREPL	9581	16	CASSETTE	RSN_HUM:NM_001171613;RSN_HUM:NM_001171606	0.79466	0.00222598	0.594836	0.00103928	0.00222598	0.199824
NOP56	10528	1	INTERNAL5	RSN_HUM:NM_006392;RSN_HUM:NR_027700	0.621281	0.0073165	0.820603	0.0175677	0.0175677	0.199322
C6orf48	50854	2	CASSETTE	RSN_HUM:NM_001287488,RSN_HUM:NM_001287487,RSN_HUM:NM_001040438;RSN_HUM:NM_001287485,RSN_HUM:NM_001040437	0.575334	0.0109915	0.376215	0.0238068	0.0238068	0.199119
GGCT	79017	4	MUT_M_EXCLU	RSN_HUM:NM_001199815;RSN_HUM:NR_037669	0.232899	0.00215021	0.431948	0.00170589	0.00215021	0.199049
GATC	283459	1	CASSETTE	RSN_HUM:NM_176818;RSN_HUM:NR_033684	0.959038	0.0018334	0.760176	0.00087335	0.0018334	0.198862
ITGB3BP	23421	1	CASSETTE	RSN_HUM:NM_014288,RSN_HUM:NR_045147;RSN_HUM:NM_001206739	0.980252	0.00101275	0.781504	0.00064555	0.00101275	0.198748
LRRFIP1	9208	82	XCASSETTE	RSN_HUM:XM_005246130,RSN_HUM:NM_001137552,RSN_HUM:NM_004735;RSN_HUM:XM_005246121,RSN_HUM:XM_005246124	0.952919	0.000930618	0.754185	0.00205221	0.00205221	0.198734
CAD	790	3	CASSETTE	RSN_HUM:XM_005264558;RSN_HUM:NM_004341,RSN_HUM:XM_005264555,RSN_HUM:XM_005264556,RSN_HUM:XM_005264557	0.0394781	0.00169208	0.238129	0.000876415	0.00169208	0.198651
RBM18	92400	1	CASSETTE	RSN_HUM:NM_033117,RSN_HUM:NR_027126;RSN_HUM:NR_027125	0.985954	0.00238142	0.787506	0.00347892	0.00347892	0.198448
FAM13B	51306	2	CASSETTE	RSN_HUM:NM_001101801;RSN_HUM:NM_001101800,RSN_HUM:NM_016603	0.215489	0.00151608	0.0171528	0.00157409	0.00157409	0.198336
PPIE	10450	5	CASSETTE	RSN_HUM:NM_203456;RSN_HUM:NM_001195007	0.479445	0.000178957	0.67762	0.00121691	0.00121691	0.198175
ITPA	3704	3	CASSETTE	RSN_HUM:NR_052000,RSN_HUM:NR_052002;RSN_HUM:NM_033453,RSN_HUM:NM_181493	0.0355072	0.00318949	0.233511	0.00174682	0.00318949	0.198004
MEG3	55384	29	MUT_M_EXCLU	RSN_HUM:NR_033359;RSN_HUM:NR_033360	0.71435	0.00188887	0.516688	0.00302303	0.00302303	0.197662
NPRL3	8131	4	CASSETTE	RSN_HUM:NM_001077350,RSN_HUM:NM_001243248,RSN_HUM:NM_001243249;RSN_HUM:NM_001243247	0.810288	0.00140732	0.612752	0.000961349	0.00140732	0.197536
RBM14	10432	1	CASSETTE	RSN_HUM:NM_001198837;RSN_HUM:NM_001198836	0.0203715	0.0011143	0.217852	4.9575e-05	0.0011143	0.197481
KIAA0226	9711	1	CASSETTE	RSN_HUM:NM_014687;RSN_HUM:XM_005269374,RSN_HUM:NM_001145642	0.98241	0.0013701	0.785063	0.0013483	0.0013701	0.197347
EHMT1	79813	2	INTERNAL3	RSN_HUM:NM_001145527,RSN_HUM:NM_024757,RSN_HUM:XM_005266108,RSN_HUM:XM_005266111,RSN_HUM:XM_005266110,RSN_HUM:XM_005266105,RSN_HUM:XM_005266106,RSN_HUM:XM_005266109;RSN_HUM:XM_005266107	0.503098	0.00238035	0.305854	0.000916954	0.00238035	0.197244
CTDSPL	10217	1	CASSETTE	RSN_HUM:NM_005808;RSN_HUM:NM_001008392	0.513607	0.0017344	0.31716	0.000687666	0.0017344	0.196447
MRPL21	219927	1	INTERNAL5	RSN_HUM:NM_181514;RSN_HUM:NM_181515	0.905689	0.00545958	0.709296	0.0052132	0.00545958	0.196393
SLC35B1	10237	1	INTERNAL3	RSN_HUM:NM_001278784,RSN_HUM:XM_005256929;RSN_HUM:NM_005827	0.248602	0.00349555	0.44495	0.0035395	0.0035395	0.196348
WNK1	65125	14	CASSETTE	RSN_HUM:XM_005253737,RSN_HUM:XM_005253741;RSN_HUM:XM_005253739,RSN_HUM:NM_014823	0.257396	0.00183763	0.0610653	0.00193727	0.00193727	0.196331
MTRF1L	54516	4	INTERNAL3	RSN_HUM:NM_001114184,RSN_HUM:NM_019041;RSN_HUM:XM_005267036	0.490455	0.00213112	0.294995	0.002757	0.002757	0.19546
CFL2	1073	5	INTERNAL5	RSN_HUM:NM_138638;RSN_HUM:NR_028131	0.945055	0.0165146	0.749608	0.00507763	0.0165146	0.195447
PRMT2	3275	6	LCASSETTE	RSN_HUM:NM_001242864;RSN_HUM:NM_001535,RSN_HUM:NM_206962,RSN_HUM:XM_005261111	0.292893	0.00502197	0.0975057	0.00794005	0.00794005	0.195387
LSM14B	149986	1	CASSETTE	RSN_HUM:NM_144703;RSN_HUM:XM_005260302	0.44714	0.00430536	0.251762	0.00197885	0.00430536	0.195378
CREBBP	1387	2	CASSETTE	RSN_HUM:XM_005255124;RSN_HUM:NM_001079846,RSN_HUM:NM_004380,RSN_HUM:XM_005255125	0.20269	0.00189896	0.00733552	0.00147229	0.00189896	0.195354
IKBKB	3551	6	CASSETTE	RSN_HUM:NM_001242778;RSN_HUM:NM_001556,RSN_HUM:NR_033818,RSN_HUM:NR_033819,RSN_HUM:NR_040009	0.25208	0.0010252	0.44713	0.000317283	0.0010252	0.19505
MEG3	55384	27	CASSETTE	RSN_HUM:NR_033358,RSN_HUM:NR_033360,RSN_HUM:NR_046467,RSN_HUM:NR_046468,RSN_HUM:NR_046472;RSN_HUM:NR_046470	0.244679	0.0022686	0.439578	0.00317049	0.00317049	0.194899
ILKAP	80895	2	INTERNAL5	RSN_HUM:NM_030768;RSN_HUM:XM_005246106	0.928968	0.0021089	0.734094	0.00355125	0.00355125	0.194874
VRK2	7444	9	INTERNAL5	RSN_HUM:NM_001288837,RSN_HUM:NM_001288838,RSN_HUM:NM_001130480,RSN_HUM:NM_001130482,RSN_HUM:NM_001130483,RSN_HUM:NM_001288836,RSN_HUM:NM_006296,RSN_HUM:NM_001130481,RSN_HUM:XM_005264540;RSN_HUM:XM_005264541	0.986844	0.00203708	0.792086	0.00081524	0.00203708	0.194758
CSDE1	7812	2	CASSETTE	RSN_HUM:NM_001007553,RSN_HUM:NM_007158;RSN_HUM:NM_001130523,RSN_HUM:NM_001242891	0.98429	0.0203368	0.789644	0.025138	0.025138	0.194646
CAMSAP2	23271	2	INTERNAL3	RSN_HUM:NM_203459,RSN_HUM:XM_005245040;RSN_HUM:XM_005245041,RSN_HUM:XM_005245042	0.764119	0.0016148	0.569643	0.0018164	0.0018164	0.194476
MTMR2	8898	3	CASSETTE	RSN_HUM:NM_201278;RSN_HUM:NM_001243571	0.876313	0.00184044	0.682275	0.00145645	0.00184044	0.194038
DENND1A	57706	2	CASSETTE	RSN_HUM:NM_020946,RSN_HUM:XM_005252111,RSN_HUM:XM_005252113,RSN_HUM:NM_024820;RSN_HUM:XM_005252109	0.829633	0.001252	0.635756	0.00094099	0.001252	0.193877
UBE2V1	7335	63	MUT_EXCLU	RSN_HUM:NM_001257399;RSN_HUM:NM_001282579	0.233297	7.18807e-05	0.0394817	0.00104752	0.00104752	0.193815
EPB41L1	2036	4	CASSETTE	RSN_HUM:NM_001258331,RSN_HUM:XM_005260323,RSN_HUM:NM_177996;RSN_HUM:XM_005260319,RSN_HUM:XM_005260321,RSN_HUM:XM_005260322,RSN_HUM:NM_001258329	0.511079	0.00130794	0.317301	0.000989282	0.00130794	0.193778
ENTPD6	955	10	CASSETTE	RSN_HUM:XM_005260886,RSN_HUM:XM_005260887;RSN_HUM:NM_001114089	0.173904	0.00325869	0.367639	0.00221929	0.00325869	0.193735
LRRFIP1	9208	25	MUT_M_EXCLU	RSN_HUM:XM_005246128,RSN_HUM:XM_005246125;RSN_HUM:XM_005246121,RSN_HUM:XM_005246124	0.638041	5.36905e-05	0.831678	0.00110227	0.00110227	0.193637
WDR33	55339	1	CASSETTE	RSN_HUM:XM_005263697;RSN_HUM:NM_018383	0.0641843	0.00106101	0.25778	0.0017449	0.0017449	0.193596
EHMT1	79813	3	CASSETTE	RSN_HUM:XM_005266108;RSN_HUM:NM_001145527,RSN_HUM:NM_024757,RSN_HUM:XM_005266107,RSN_HUM:XM_005266111,RSN_HUM:XM_005266110,RSN_HUM:XM_005266105,RSN_HUM:XM_005266106,RSN_HUM:XM_005266109	0.202434	0.00183022	0.39596	0.000605364	0.00183022	0.193526
C3orf17	25871	6	INTERNAL5	RSN_HUM:NR_027794;RSN_HUM:NR_027796	0.089618	0.00155382	0.283113	0.00104075	0.00155382	0.193495
C3orf17	25871	4	INTERNAL5	RSN_HUM:NM_015412;RSN_HUM:XM_005247276	0.910382	0.00155382	0.716887	0.00104075	0.00155382	0.193495
NEMF	9147	1	CASSETTE	RSN_HUM:XM_005268199;RSN_HUM:NM_004713,RSN_HUM:XM_005268200,RSN_HUM:XM_005268201	0.473666	0.0034423	0.280382	0.0011841	0.0034423	0.193284
RBM4	5936	2	CASSETTE	RSN_HUM:NM_001198843;RSN_HUM:NM_002896	0.310405	0.0060347	0.503618	0.00125393	0.0060347	0.193213
SCLT1	132320	1	CASSETTE	RSN_HUM:XM_005262732;RSN_HUM:NM_144643	0.760288	0.00357575	0.953044	0.001544	0.00357575	0.192756
MFF	56947	19	MUT_EXCLU	RSN_HUM:NM_001277063,RSN_HUM:XM_005246686;RSN_HUM:NM_001277064,RSN_HUM:XM_005246687	0.246369	0.00274902	0.438789	0.001527	0.00274902	0.19242
MFF	56947	24	MUT_M_EXCLU	RSN_HUM:NM_001277063,RSN_HUM:XM_005246686;RSN_HUM:NM_001277068	0.348746	0.00194202	0.541129	0.00123821	0.00194202	0.192383
SEC24C	9632	1	CASSETTE	RSN_HUM:NM_198597;RSN_HUM:NM_004922	0.864808	0.00242285	0.672558	0.00235355	0.00242285	0.19225
RNF146	81847	4	CASSETTE	RSN_HUM:NM_001242851,RSN_HUM:NM_001242849,RSN_HUM:NM_001242850;RSN_HUM:NR_045102,RSN_HUM:NR_045103	0.655415	0.0019079	0.463663	0.00493268	0.00493268	0.191752
MFF	56947	21	CASSETTE	RSN_HUM:NM_001277063,RSN_HUM:XM_005246686;RSN_HUM:XM_005246681	0.604368	0.00140428	0.413125	0.00113791	0.00140428	0.191243
GSN	2934	14	MUT_EXCLU	RSN_HUM:NM_001127663;RSN_HUM:NM_001127665	0.235907	0.00101436	0.427083	0.000750479	0.00101436	0.191176
PRMT7	54496	2	CASSETTE	RSN_HUM:NM_001184824;RSN_HUM:NM_019023,RSN_HUM:XM_005255988,RSN_HUM:XM_005255991,RSN_HUM:XM_005255989,RSN_HUM:NM_001290018	0.268062	0.00139035	0.0773936	0.000664137	0.00139035	0.190668
EPB41L3	23136	10	LCASSETTE	RSN_HUM:XM_005258091;RSN_HUM:NM_001281533,RSN_HUM:XM_005258086,RSN_HUM:XM_005258089	0.336482	0.00151182	0.145858	0.000996858	0.00151182	0.190624
ABHD2	11057	1	XCASSETTE	RSN_HUM:NM_152924;RSN_HUM:NM_007011	0.990879	0.00181718	0.800436	0.00166197	0.00181718	0.190443
UBAP2L	9898	4	INTERNAL5	RSN_HUM:NM_001127320,RSN_HUM:NM_014847,RSN_HUM:XM_005245672,RSN_HUM:XM_005245674;RSN_HUM:NM_001287816,RSN_HUM:XM_005245658,RSN_HUM:XM_005245667,RSN_HUM:XM_005245668,RSN_HUM:XM_005245669,RSN_HUM:XM_005245670,RSN_HUM:XM_005245673	0.864075	0.00752324	0.673686	0.00621488	0.00752324	0.190389
C6orf48	50854	3	CASSETTE	RSN_HUM:NM_001287488,RSN_HUM:NM_001287487,RSN_HUM:NM_001040438;RSN_HUM:NM_001287486	0.697942	0.00906058	0.507593	0.017645	0.017645	0.190349
PDLIM7	9260	1	MUT_EXCLU	RSN_HUM:NM_005451,RSN_HUM:NR_103804,RSN_HUM:NM_213636;RSN_HUM:NM_203352	0.957281	0.0147114	0.767205	0.00626478	0.0147114	0.190076
CYB5A	1528	3	CASSETTE	RSN_HUM:NM_148923;RSN_HUM:NM_001914	0.9631	0.0039322	0.773218	0.0037547	0.0039322	0.189882
SMC6	79677	3	CASSETTE	RSN_HUM:NM_024624;RSN_HUM:XM_005262628	0.907315	0.00111318	0.717539	0.000821976	0.00111318	0.189776
SIK3	23387	2	CASSETTE	RSN_HUM:NM_001281749;RSN_HUM:NM_001281748,RSN_HUM:NM_025164	0.264577	0.00124274	0.0749078	0.000879748	0.00124274	0.189669
MEG3	55384	46	CASSETTE	RSN_HUM:NR_046464,RSN_HUM:NR_046469;RSN_HUM:NR_046470	0.37844	0.000478015	0.18879	0.00109301	0.00109301	0.18965
SPOPL	339745	2	INTERNAL3	RSN_HUM:NM_001001664,RSN_HUM:XM_005263655;RSN_HUM:XM_005263656,RSN_HUM:XM_005263657	0.857324	0.00063185	0.66792	0.0025003	0.0025003	0.189404
SMG1	23049	4	CASSETTE	RSN_HUM:XM_005255182,RSN_HUM:XM_005255184,RSN_HUM:XM_005255185;RSN_HUM:XM_005255183	0.547986	0.00065175	0.358614	0.0014464	0.0014464	0.189372
ABL2	27	3	CASSETTE	RSN_HUM:NM_001168239;RSN_HUM:NM_001136000,RSN_HUM:NM_005158	0.57419	0.0014638	0.384836	0.00932175	0.00932175	0.189354
PRRC2C	23215	4	CASSETTE	RSN_HUM:XM_005245015,RSN_HUM:XM_005245017,RSN_HUM:XM_005245018,RSN_HUM:XM_005245019,RSN_HUM:XM_005245022,RSN_HUM:XM_005245016;RSN_HUM:XM_005245020	0.213796	0.000447624	0.0247013	0.00136025	0.00136025	0.189095
CFL2	1073	4	INTERNAL5	RSN_HUM:NM_138638;RSN_HUM:NR_028130	0.901332	0.0173157	0.71232	0.00534343	0.0173157	0.189012
MAP7D1	55700	1	CASSETTE	RSN_HUM:NM_001286365;RSN_HUM:NM_018067	0.575389	0.0136307	0.386488	0.00601778	0.0136307	0.188901
CTAGE5	4253	4	CASSETTE	RSN_HUM:NM_001247988,RSN_HUM:NM_203355;RSN_HUM:NM_203354,RSN_HUM:XM_005267649,RSN_HUM:XM_005267650,RSN_HUM:NM_203356,RSN_HUM:XM_005267648,RSN_HUM:XM_005267646,RSN_HUM:NM_001247989,RSN_HUM:NM_001247990,RSN_HUM:NM_005930,RSN_HUM:XM_005267647	0.211211	0.00091283	0.02235	0.00198658	0.00198658	0.188861
ZNF384	171017	1	CASSETTE	RSN_HUM:NM_001039920,RSN_HUM:NM_133476;RSN_HUM:NM_001135734	0.662507	0.00263024	0.473652	0.00211885	0.00263024	0.188855
THAP5	168451	6	INTERNAL5	RSN_HUM:NM_001287598;RSN_HUM:NM_182529	0.125014	0.0009199	0.313846	0.00345265	0.00345265	0.188832
THAP5	168451	1	INTERNAL5	RSN_HUM:NM_001130475;RSN_HUM:NM_001287599	0.874986	0.0009199	0.686154	0.00345265	0.00345265	0.188832
ENTPD6	955	12	LCASSETTE	RSN_HUM:XM_005260886,RSN_HUM:XM_005260887;RSN_HUM:NM_001247	0.187129	0.0030284	0.375935	0.00217032	0.0030284	0.188806
LDB2	9079	14	CASSETTE	RSN_HUM:XM_005248198;RSN_HUM:XM_005248202	0.53751	0.00108649	0.348809	0.000196956	0.00108649	0.188701
SLC30A6	55676	1	CASSETTE	RSN_HUM:NM_001193514,RSN_HUM:NM_001193515,RSN_HUM:NM_017964;RSN_HUM:NM_001193513	0.915139	0.00158024	0.726618	0.00497144	0.00497144	0.188521
UIMC1	51720	5	LCASSETTE	RSN_HUM:XM_005265932,RSN_HUM:XM_005265933;RSN_HUM:NM_001199297,RSN_HUM:NM_001199298,RSN_HUM:NM_016290,RSN_HUM:XM_005265930	0.215002	0.00123557	0.403509	0.00118015	0.00123557	0.188507
MOK	5891	11	INTERNAL3	RSN_HUM:NR_073541,RSN_HUM:NR_073542;RSN_HUM:NR_073543	0.791809	0.00180853	0.603414	0.00106479	0.00180853	0.188395
MEG3	55384	42	MUT_M_EXCLU	RSN_HUM:NR_033360;RSN_HUM:NR_003531	0.238721	0.00226019	0.426847	0.00342293	0.00342293	0.188126
RFWD2	64326	3	INTERNAL5	RSN_HUM:NM_001001740,RSN_HUM:XM_005245447;RSN_HUM:NM_022457,RSN_HUM:XM_005245448	0.353382	0.00213863	0.165284	0.000454975	0.00213863	0.188098
CEP63	80254	4	CASSETTE	RSN_HUM:NM_001042383,RSN_HUM:NM_001042384;RSN_HUM:XM_005247795,RSN_HUM:NM_001042400,RSN_HUM:XM_005247799,RSN_HUM:NM_025180,RSN_HUM:XM_005247797	0.856906	0.00332645	0.669088	0.00175717	0.00332645	0.187818
VLDLR	7436	1	CASSETTE	RSN_HUM:NM_001018056;RSN_HUM:NM_003383	0.547794	0.00276345	0.359989	0.00321204	0.00321204	0.187805
SRSF11	9295	2	INTERNAL3	RSN_HUM:NM_001190987;RSN_HUM:NM_004768	0.809332	0.00120157	0.62154	0.000209533	0.00120157	0.187792
C6orf48	50854	5	CASSETTE	RSN_HUM:NM_001287488,RSN_HUM:NM_001287487,RSN_HUM:NM_001040438;RSN_HUM:NM_001287482	0.696954	0.00907342	0.509351	0.0175841	0.0175841	0.187603
APLP2	334	3	CASSETTE	RSN_HUM:NM_001142276,RSN_HUM:NM_001142277,RSN_HUM:NM_001142278,RSN_HUM:NR_024515,RSN_HUM:NM_001243299;RSN_HUM:NM_001642,RSN_HUM:NR_024516	0.928183	0.0303132	0.740589	0.0514199	0.0514199	0.187594
SSFA2	6744	6	CASSETTE	RSN_HUM:NM_001287503,RSN_HUM:NM_001287504;RSN_HUM:XM_005246812,RSN_HUM:XM_005246813	0.23801	0.00200916	0.0505861	0.00248092	0.00248092	0.187424
SLMAP	7871	7	LCASSETTE	RSN_HUM:XM_005265467,RSN_HUM:XM_005265472;RSN_HUM:XM_005265456,RSN_HUM:XM_005265457,RSN_HUM:XM_005265458,RSN_HUM:XM_005265468,RSN_HUM:XM_005265469	0.800347	0.00242932	0.61293	0.000878892	0.00242932	0.187417
NEMF	9147	3	CASSETTE	RSN_HUM:XM_005268201;RSN_HUM:NM_004713,RSN_HUM:XM_005268199	0.572508	0.00267926	0.385269	0.0008119	0.00267926	0.187239
GRAMD1A	57655	3	CASSETTE	RSN_HUM:XM_005259104,RSN_HUM:XM_005259105,RSN_HUM:XM_005259103,RSN_HUM:NM_001136199,RSN_HUM:XM_005259106;RSN_HUM:NM_020895	0.984537	0.00306538	0.797333	0.00325188	0.00325188	0.187204
EPB41L3	23136	12	LCASSETTE	RSN_HUM:NM_001281534,RSN_HUM:NM_001281535,RSN_HUM:XM_005258089,RSN_HUM:XM_005258090,RSN_HUM:XM_005258091;RSN_HUM:XM_005258085	0.983625	0.00419162	0.796424	0.00285883	0.00419162	0.187201
PXK	54899	20	XCASSETTE	RSN_HUM:NM_001289101;RSN_HUM:NM_001289099	0.12432	0.00203829	0.311127	0.000808672	0.00203829	0.186807
RAD17	5884	16	CASSETTE	RSN_HUM:NM_133339;RSN_HUM:NM_133338	0.582478	0.00168521	0.395709	0.00183241	0.00183241	0.186769
ZNF143	7702	4	CASSETTE	RSN_HUM:NM_001282656,RSN_HUM:NM_003442,RSN_HUM:XM_005253122,RSN_HUM:XM_005253121,RSN_HUM:XM_005253126;RSN_HUM:XM_005253127	1	0.00038446	0.813331	0.00118338	0.00118338	0.186669
ZNF343	79175	2	CASSETTE	RSN_HUM:NM_001282495,RSN_HUM:NM_001282496,RSN_HUM:NM_001282498,RSN_HUM:NM_024325;RSN_HUM:NM_001282497	0.91261	0.00215071	0.726165	0.00038892	0.00215071	0.186445
MFF	56947	20	CASSETTE	RSN_HUM:NM_001277065,RSN_HUM:NM_001277066,RSN_HUM:NR_102266,RSN_HUM:XM_005246688;RSN_HUM:NM_001277063,RSN_HUM:XM_005246686	0.815049	0.00292952	0.628823	0.00144413	0.00292952	0.186226
MR1	3140	6	CASSETTE	RSN_HUM:NM_001195000;RSN_HUM:NM_001531,RSN_HUM:XM_005245115	0.680712	0.0029406	0.494662	0.00136275	0.0029406	0.18605
LRRFIP1	9208	84	LCASSETTE	RSN_HUM:XM_005246130,RSN_HUM:NM_001137552,RSN_HUM:NM_004735;RSN_HUM:XM_005246126,RSN_HUM:XM_005246129,RSN_HUM:XM_005246131	0.913651	0.000970615	0.727611	0.00212716	0.00212716	0.18604
RABL2B	11158	9	MUT_EXCLU	RSN_HUM:NM_001130920,RSN_HUM:NM_001130923;RSN_HUM:NM_001130921	0.083379	0.0005472	0.269402	0.00185679	0.00185679	0.186023
SLMAP	7871	3	CASSETTE	RSN_HUM:XM_005265459,RSN_HUM:XM_005265461;RSN_HUM:XM_005265456,RSN_HUM:XM_005265457,RSN_HUM:XM_005265458,RSN_HUM:XM_005265468,RSN_HUM:XM_005265469	0.883342	0.00214107	0.697393	0.00078435	0.00214107	0.185949
2008-03-01	220972	1	CASSETTE	RSN_HUM:NM_001002266,RSN_HUM:NM_145021;RSN_HUM:NM_001282866	0.933068	0.0015666	0.747238	0.0011863	0.0015666	0.18583
PLAGL1	5325	54	MUT_M_EXCLU	RSN_HUM:NM_001080955,RSN_HUM:NM_001289041;RSN_HUM:NM_001289047	0.189075	0.00174741	0.374776	0.00108282	0.00174741	0.185701
TEX2	55852	3	INTERNAL3	RSN_HUM:NM_001288732,RSN_HUM:NM_001288733,RSN_HUM:NM_018469;RSN_HUM:XM_005257507	0.983015	0.0016191	0.797453	0.0012955	0.0016191	0.185562
MFF	56947	27	CASSETTE	RSN_HUM:NM_001277064,RSN_HUM:XM_005246687;RSN_HUM:XM_005246685	0.744375	0.00202237	0.558822	0.00120468	0.00202237	0.185553
UBR5	51366	3	INTERNAL3	RSN_HUM:NM_001282873,RSN_HUM:NM_015902,RSN_HUM:XM_005250956,RSN_HUM:XM_005250957;RSN_HUM:XM_005250959,RSN_HUM:XM_005250960	0.459375	0.0015003	0.273917	0.0006648	0.0015003	0.185458
TMEM126B	55863	4	CASSETTE	RSN_HUM:NM_018480;RSN_HUM:NM_001193537	0.947941	0.00191056	0.762623	0.00053893	0.00191056	0.185318
NSMF	26012	2	LCASSETTE	RSN_HUM:NM_001130971,RSN_HUM:XM_005266062;RSN_HUM:NM_001130969,RSN_HUM:NM_001178064	0.488009	0.000840255	0.302738	0.00120335	0.00120335	0.185271
MEG3	55384	38	CASSETTE	RSN_HUM:NR_046466;RSN_HUM:NR_033360	0.593664	0.00132786	0.408467	0.00246996	0.00246996	0.185197
CPNE1	8904	15	CASSETTE	RSN_HUM:NM_152928;RSN_HUM:NR_037188	0.242136	0.00142317	0.427309	0.000698558	0.00142317	0.185173
THAP9-AS1	100499177	3	CASSETTE	RSN_HUM:NR_034077;RSN_HUM:NR_034076	0.221229	0.00184018	0.0360706	0.00275848	0.00275848	0.185158
EXOSC9	5393	1	CASSETTE	RSN_HUM:NM_005033;RSN_HUM:NM_001034194	0.802111	0.0034623	0.617239	0.00042115	0.0034623	0.184872
ARL6	84100	2	CASSETTE	RSN_HUM:NM_001278293;RSN_HUM:NM_177976	0.990826	0.00100825	0.805962	0.0007648	0.00100825	0.184864
RBMS3	27303	2	CASSETTE	RSN_HUM:XM_005265061,RSN_HUM:XM_005265062,RSN_HUM:NM_001003792;RSN_HUM:XM_005265060,RSN_HUM:NM_001003793,RSN_HUM:NM_001177711,RSN_HUM:NM_001177712,RSN_HUM:NM_014483,RSN_HUM:XM_005265064,RSN_HUM:XM_005265063,RSN_HUM:XM_005265065	0.184848	0.00138817	0	5.17166e-05	0.00138817	0.184848
NAV2	89797	5	CASSETTE	RSN_HUM:NM_001111019;RSN_HUM:NM_001111018,RSN_HUM:NM_001244963,RSN_HUM:NM_145117,RSN_HUM:NM_182964	0.55447	0.00114271	0.370011	0.00086565	0.00114271	0.184459
SPRY4	81848	1	CASSETTE	RSN_HUM:NM_001127496;RSN_HUM:NM_030964	0.93766	0.0007812	0.753248	0.0022626	0.0022626	0.184412
MFF	56947	1	CASSETTE	RSN_HUM:NM_001277062,RSN_HUM:NM_001277063,RSN_HUM:NM_001277064,RSN_HUM:NM_001277065,RSN_HUM:XM_005246683,RSN_HUM:NM_001277068;RSN_HUM:NM_001277061,RSN_HUM:XM_005246681,RSN_HUM:XM_005246682,RSN_HUM:XM_005246684,RSN_HUM:XM_005246685,RSN_HUM:XM_005246686,RSN_HUM:XM_005246687,RSN_HUM:XM_005246688,RSN_HUM:NM_020194	0.905734	0.00338543	0.721597	0.0018368	0.00338543	0.184137
UIMC1	51720	17	XCASSETTE	RSN_HUM:XM_005265932,RSN_HUM:XM_005265933;RSN_HUM:XM_005265931	0.253871	0.0010464	0.437907	0.00108745	0.00108745	0.184036
MEIS2	4212	3	INTERNAL3	RSN_HUM:NM_001220482,RSN_HUM:NM_170676;RSN_HUM:NM_170675	0.524335	0.00736329	0.708081	0.000762404	0.00736329	0.183746
MEIS2	4212	9	INTERNAL3	RSN_HUM:NM_002399,RSN_HUM:NM_170674,RSN_HUM:NM_172316,RSN_HUM:NR_051953;RSN_HUM:NM_170677,RSN_HUM:NM_172315	0.524335	0.00736329	0.708081	0.000762404	0.00736329	0.183746
PPP6R2	9701	2	CASSETTE	RSN_HUM:NM_001242899,RSN_HUM:NM_001242900,RSN_HUM:NM_014678,RSN_HUM:XM_005261958,RSN_HUM:XM_005261959;RSN_HUM:NM_001242898,RSN_HUM:XM_005261956,RSN_HUM:XM_005261957,RSN_HUM:XM_005261960	0.414876	0.00300571	0.231239	0.00393056	0.00393056	0.183637
JMJD1C	221037	3	CASSETTE	RSN_HUM:XM_005269624;RSN_HUM:NM_001282948,RSN_HUM:NM_032776,RSN_HUM:XM_005269626,RSN_HUM:XM_005269627,RSN_HUM:XM_005269628	0.228576	0.000807172	0.0451473	0.00162801	0.00162801	0.183429
PAPOLA	10914	4	CASSETTE	RSN_HUM:XM_005267282;RSN_HUM:XM_005267281	0.342065	0.00384284	0.158641	0.00314042	0.00384284	0.183424
TRIQK	286144	2	INTERNAL3	RSN_HUM:NM_001171795;RSN_HUM:NM_001171797,RSN_HUM:NM_001191035,RSN_HUM:NM_001191036	0.367934	0.00136383	0.551312	0.000315067	0.00136383	0.183378
MELK	9833	16	MUT_EXCLU	RSN_HUM:NM_001256690;RSN_HUM:NM_001256693	0.396659	0.00184361	0.213405	0.000568015	0.00184361	0.183254
ARHGEF10L	55160	5	CASSETTE	RSN_HUM:XM_005245926,RSN_HUM:XM_005245929;RSN_HUM:NM_018125,RSN_HUM:NM_001011722	0.304141	0.00103965	0.120905	0.00031595	0.00103965	0.183236
SLMAP	7871	21	LCASSETTE	RSN_HUM:XM_005265470,RSN_HUM:XM_005265471;RSN_HUM:XM_005265460	0.842053	0.00234724	0.658908	0.000801174	0.00234724	0.183145
PET100	100131801	1	CASSETTE	RSN_HUM:NM_001171155;RSN_HUM:NR_033242	0.963193	0.00777028	0.780203	0.00151845	0.00777028	0.18299
TLE2	7089	9	LCASSETTE	RSN_HUM:NM_001144762;RSN_HUM:NM_003260	0.432239	0.000925644	0.249344	0.00104755	0.00104755	0.182895
MLH1	4292	2	CASSETTE	RSN_HUM:NM_001258273;RSN_HUM:NM_000249,RSN_HUM:NM_001258271	0.621171	0.00526506	0.803728	0.0020334	0.00526506	0.182557
CD44	960	56	XCASSETTE	RSN_HUM:XM_005253238;RSN_HUM:XM_005253231,RSN_HUM:XM_005253232	0.954317	0.00136296	0.771843	0.00664343	0.00664343	0.182474
WDR76	79968	1	INTERNAL3	RSN_HUM:NM_001167941;RSN_HUM:NM_024908,RSN_HUM:XM_005254681	0.0168067	0.0010948	0.199267	0.0002183	0.0010948	0.18246
2002-09-01	4735	15	MUT_EXCLU	RSN_HUM:NM_001008492;RSN_HUM:NM_001282972	0.67303	0.000607593	0.49115	0.00149431	0.00149431	0.18188
MEF2A	4205	12	INTERNAL5	RSN_HUM:NM_005587;RSN_HUM:XM_005254914,RSN_HUM:XM_005254916	0.907339	0.000439527	0.725567	0.00153273	0.00153273	0.181772
ZNF621	285268	4	CASSETTE	RSN_HUM:XM_005265080;RSN_HUM:NM_001098414,RSN_HUM:NM_001287245,RSN_HUM:NM_198484	0.324761	0.00110173	0.143328	0.000547696	0.00110173	0.181433
TBL1X	6907	1	CASSETTE	RSN_HUM:NM_001139467,RSN_HUM:NM_001139468;RSN_HUM:NM_001139466,RSN_HUM:NM_005647	0.270517	0.0012831	0.0891122	0.0011205	0.0012831	0.181405
NUP62	23636	10	CASSETTE	RSN_HUM:NM_153718;RSN_HUM:NM_153719	0.541863	0.00255821	0.360768	0.00123708	0.00255821	0.181095
CALHM2	51063	2	INTERNAL3	RSN_HUM:NM_015916;RSN_HUM:NR_046344	0.498224	0.00352422	0.317159	0.000465067	0.00352422	0.181065
SYTL2	54843	2	CASSETTE	RSN_HUM:NM_001162952,RSN_HUM:NM_001289609,RSN_HUM:NM_001289610,RSN_HUM:NM_032943;RSN_HUM:NM_001162951,RSN_HUM:NM_001162953,RSN_HUM:NM_001289608,RSN_HUM:NM_206929	0.856058	0.00136835	0.675041	0.000737692	0.00136835	0.181017
EIF4G3	8672	1	CASSETTE	RSN_HUM:NM_001198802,RSN_HUM:NM_003760;RSN_HUM:NM_001198801	0.854223	0.00375265	0.673269	0.0019943	0.00375265	0.180954
MTX2	10651	1	CASSETTE	RSN_HUM:NM_006554;RSN_HUM:NR_027850	0.971645	0.00809316	0.791042	0.00483875	0.00809316	0.180603
SF3B1	23451	1	CASSETTE	RSN_HUM:NM_012433;RSN_HUM:XM_005246428	0.974502	0.00919349	0.793933	0.00284974	0.00919349	0.180569
DPM1	8813	1	LCASSETTE	RSN_HUM:XM_005260601;RSN_HUM:XM_005260600	0.65841	0.00402272	0.478385	0.008397	0.008397	0.180025
MEG3	55384	16	CASSETTE	RSN_HUM:NR_033360,RSN_HUM:NR_046470;RSN_HUM:NR_003530,RSN_HUM:NR_033358,RSN_HUM:NR_046468	0.325608	0.00149198	0.505063	0.00298586	0.00298586	0.179455
CD44	960	10	XCASSETTE	RSN_HUM:XM_005253238;RSN_HUM:NM_000610	0.956356	0.00136006	0.777176	0.00659784	0.00659784	0.17918
LYRM1	57149	9	CASSETTE	RSN_HUM:NM_001128302;RSN_HUM:NM_001128301	0.769157	0.00103282	0.590026	0.00110199	0.00110199	0.179131
ECT2	1894	5	CASSETTE	RSN_HUM:NM_001258315,RSN_HUM:NM_018098;RSN_HUM:NM_001258316	0.778701	0.00274896	0.59978	0.000490313	0.00274896	0.178921
TLE2	7089	3	LCASSETTE	RSN_HUM:NM_001144762;RSN_HUM:NM_001144761,RSN_HUM:XM_005259636	0.417835	0.000957554	0.239187	0.00109203	0.00109203	0.178648
RAPH1	65059	5	CASSETTE	RSN_HUM:XM_005246780;RSN_HUM:XM_005246777,RSN_HUM:XM_005246779,RSN_HUM:NM_203365	0.200246	0.00020325	0.0216141	0.00285462	0.00285462	0.178632
ACOX1	51	2	MUT_EXCLU	RSN_HUM:NM_001185039,RSN_HUM:NM_004035;RSN_HUM:NM_007292	0.747903	0.00142233	0.926475	0.00295675	0.00295675	0.178572
MBD1	4152	10	CASSETTE	RSN_HUM:NM_001204143,RSN_HUM:NM_002384,RSN_HUM:NM_015844,RSN_HUM:NM_001204140,RSN_HUM:XM_005258272,RSN_HUM:XM_005258274;RSN_HUM:NM_001204139,RSN_HUM:XM_005258264,RSN_HUM:NM_001204136,RSN_HUM:NM_015846,RSN_HUM:NM_015847,RSN_HUM:XM_005258262,RSN_HUM:NM_001204142,RSN_HUM:NM_001204137,RSN_HUM:XM_005258265,RSN_HUM:XM_005258268,RSN_HUM:XM_005258271	0.399741	0.00200622	0.221269	0.00277486	0.00277486	0.178472
BANP	54971	4	CASSETTE	RSN_HUM:NM_001173539,RSN_HUM:NM_001173541,RSN_HUM:NM_017869,RSN_HUM:XM_005256008,RSN_HUM:XM_005256009,RSN_HUM:XM_005256010,RSN_HUM:XM_005256012,RSN_HUM:NM_001173542;RSN_HUM:NM_001173540,RSN_HUM:NM_079837,RSN_HUM:NM_001173543	0.538533	0.000675021	0.716974	0.00184099	0.00184099	0.178441
TCF4	6925	6	INTERNAL5	RSN_HUM:NM_001083962,RSN_HUM:NM_001243226,RSN_HUM:NM_001243227,RSN_HUM:NM_001243228,RSN_HUM:NM_001243232,RSN_HUM:NM_001243234,RSN_HUM:XM_005266739,RSN_HUM:XM_005266741,RSN_HUM:XM_005266743,RSN_HUM:XM_005266744,RSN_HUM:XM_005266745,RSN_HUM:XM_005266747,RSN_HUM:XM_005266749,RSN_HUM:XM_005266752,RSN_HUM:XM_005266754,RSN_HUM:XM_005266755,RSN_HUM:XM_005266761;RSN_HUM:NM_001243230,RSN_HUM:NM_001243231,…	0.665025	0.00383581	0.843299	0.00241097	0.00383581	0.178274
ARHGAP12	94134	3	CASSETTE	RSN_HUM:NM_001270697,RSN_HUM:NM_001270698,RSN_HUM:NM_001270699,RSN_HUM:XM_005252644;RSN_HUM:NM_001270695,RSN_HUM:NM_001270696,RSN_HUM:NM_018287	0.229609	0.00214941	0.0513979	0.00152633	0.00214941	0.178211
RPAIN	84268	4	CASSETTE	RSN_HUM:NR_027679,RSN_HUM:NR_027683,RSN_HUM:NR_027684;RSN_HUM:NM_001033002,RSN_HUM:NM_001160243,RSN_HUM:NM_001160244	0.292445	0.00117173	0.11428	0.00144498	0.00144498	0.178165
TCERG1	10915	1	CASSETTE	RSN_HUM:NM_001040006,RSN_HUM:XM_005268366;RSN_HUM:NM_006706,RSN_HUM:XM_005268365,RSN_HUM:XM_005268367	0.852238	0.0026387	0.674135	0.00257515	0.0026387	0.178103
NME7	29922	4	INTERNAL3	RSN_HUM:NM_013330,RSN_HUM:NR_104229;RSN_HUM:NM_197972	0.899057	0.0016544	0.721191	0.0005441	0.0016544	0.177866
YPEL5	51646	5	CASSETTE	RSN_HUM:NM_016061;RSN_HUM:NM_001127400	0.922753	0.00545	0.74493	0.0042753	0.00545	0.177823
APTX	54840	11	CASSETTE	RSN_HUM:NM_001195250,RSN_HUM:NM_001195254;RSN_HUM:NR_036577	0.929799	0.00976677	0.752044	0.00363982	0.00976677	0.177755
PAPD4	167153	2	INTERNAL3	RSN_HUM:NM_001114393,RSN_HUM:NM_173797,RSN_HUM:NM_001114394;RSN_HUM:XM_005248451	0.577865	0.00299952	0.400171	0.0004683	0.00299952	0.177694
STAT2	6773	1	INTERNAL3	RSN_HUM:NM_005419,RSN_HUM:XM_005269108,RSN_HUM:XM_005269110,RSN_HUM:XM_005269111;RSN_HUM:NM_198332,RSN_HUM:XM_005269109	0.821561	0.0038125	0.644316	0.0035152	0.0038125	0.177245
ATP13A3	79572	2	CASSETTE	RSN_HUM:XM_005269358;RSN_HUM:NM_024524,RSN_HUM:XM_005269357,RSN_HUM:XM_005269360	0.178214	0.0048498	0.00134773	0.00741988	0.00741988	0.176866
CTIF	9811	1	CASSETTE	RSN_HUM:NM_014772;RSN_HUM:NM_001142397	0.770526	0.00132368	0.593804	0.000747609	0.00132368	0.176722
UBE2F	140739	13	CASSETTE	RSN_HUM:NM_001278308,RSN_HUM:NM_080678,RSN_HUM:NR_103498,RSN_HUM:NR_103499,RSN_HUM:NM_001278305;RSN_HUM:NR_103500	0.979836	0.00356572	0.803148	0.00300048	0.00356572	0.176688
IFT122	55764	1	CASSETTE	RSN_HUM:NM_001280541,RSN_HUM:NM_018262,RSN_HUM:NM_052985,RSN_HUM:NM_052989,RSN_HUM:XM_005247603,RSN_HUM:XM_005247604,RSN_HUM:XM_005247608,RSN_HUM:XM_005247609,RSN_HUM:XM_005247610;RSN_HUM:NM_001280545	0.975485	0.00109185	0.798926	0.00058855	0.00109185	0.176559
DAZAP1	26528	1	CASSETTE	RSN_HUM:NM_018959;RSN_HUM:NM_170711	0.974372	0.00688509	0.797844	0.012361	0.012361	0.176528
TLE2	7089	7	XCASSETTE	RSN_HUM:XM_005259637;RSN_HUM:NM_001144761,RSN_HUM:XM_005259636	0.417516	0.000938408	0.242242	0.00103038	0.00103038	0.175274
USP47	55031	3	LCASSETTE	RSN_HUM:NM_017944;RSN_HUM:XM_005252997	0.297102	0.00145775	0.12226	0.00153443	0.00153443	0.174842
ARL6	84100	1	CASSETTE	RSN_HUM:NM_001278293;RSN_HUM:NM_032146,RSN_HUM:NR_103511	0.969844	0.00103006	0.795098	0.00077525	0.00103006	0.174746
LARP7	51574	4	INTERNAL5	RSN_HUM:NM_016648;RSN_HUM:NR_049768	0.853002	0.00242657	0.678345	0.000948532	0.00242657	0.174657
SH3D19	152503	1	CASSETTE	RSN_HUM:NM_001128923,RSN_HUM:NM_001128924,RSN_HUM:NM_001243349;RSN_HUM:NM_001009555,RSN_HUM:XM_005262766,RSN_HUM:XM_005262767	0.526363	0.0049255	0.351929	0.00061035	0.0049255	0.174434
FBXW2	26190	4	INTERNAL3	RSN_HUM:NM_012164,RSN_HUM:XM_005251910;RSN_HUM:XM_005251913	0.589797	0.00275327	0.415685	0.00312657	0.00312657	0.174112
SLC3A2	6520	5	LCASSETTE	RSN_HUM:NM_001012664;RSN_HUM:NM_002394	0.482478	0.000540543	0.656449	0.00100754	0.00100754	0.173971
UBE2V1	7335	72	MUT_EXCLU	RSN_HUM:NM_001282576,RSN_HUM:NR_104218;RSN_HUM:NM_001282579	0.216816	7.0368e-05	0.0428837	0.00105125	0.00105125	0.173932
APAF1	317	1	CASSETTE	RSN_HUM:NM_001160,RSN_HUM:NM_181868;RSN_HUM:NM_013229,RSN_HUM:NM_181861	0.187647	0.00108342	0.0137899	0.00132706	0.00132706	0.173857
NCKAP1	10787	1	CASSETTE	RSN_HUM:NM_013436;RSN_HUM:NM_205842	0.993656	0.0103295	0.819828	0.00724391	0.0103295	0.173828
FAM133B	257415	3	INTERNAL3	RSN_HUM:NM_001040057,RSN_HUM:NM_001288584,RSN_HUM:NM_152789;RSN_HUM:NR_109929	0.899298	0.00175767	0.725583	0.00409377	0.00409377	0.173715
KIAA0391	9692	2	CASSETTE	RSN_HUM:NM_001256678;RSN_HUM:NM_014672,RSN_HUM:XM_005268237	0.173666	0.00113494	0	0.00010682	0.00113494	0.173666
ACLY	47	1	CASSETTE	RSN_HUM:XM_005257394,RSN_HUM:NM_198830;RSN_HUM:XM_005257393,RSN_HUM:XM_005257395,RSN_HUM:NM_001096	0.397741	0.0100337	0.224323	0.0124477	0.0124477	0.173418
SNHG16	100507246	2	CASSETTE	RSN_HUM:NR_038110;RSN_HUM:NR_038108	0.328237	0.00625599	0.155126	0.00867391	0.00867391	0.173111
SNHG16	100507246	4	CASSETTE	RSN_HUM:NR_038111;RSN_HUM:NR_038109	0.328237	0.00625599	0.155126	0.00867391	0.00867391	0.173111
CPEB4	80315	4	MUT_EXCLU	RSN_HUM:XM_005265994;RSN_HUM:XM_005265995	0.986857	0.000293632	0.81384	0.00380278	0.00380278	0.173017
TTLL3	26140	4	INTERNAL5	RSN_HUM:NM_001025930;RSN_HUM:NR_037162	0.787711	0.0009732	0.614819	0.0014562	0.0014562	0.172892
ERBB2IP	55914	14	LCASSETTE	RSN_HUM:NM_001253698,RSN_HUM:NM_001253701,RSN_HUM:NM_018695;RSN_HUM:XM_005248554,RSN_HUM:XM_005248555	0.990335	0.00295536	0.817453	0.00103435	0.00295536	0.172882
TMPO	7112	10	CASSETTE	RSN_HUM:XM_005269132;RSN_HUM:XM_005269130	0.194099	0.00330862	0.0212549	0.0006869	0.00330862	0.172844
TBCE	6905	1	CASSETTE	RSN_HUM:NM_001287802;RSN_HUM:NM_001287801,RSN_HUM:NM_003193,RSN_HUM:NM_001079515	0.0790078	0.00193905	0.251824	0.00145975	0.00193905	0.172816
EPB41L1	2036	5	CASSETTE	RSN_HUM:NM_001258331,RSN_HUM:XM_005260323,RSN_HUM:NM_177996;RSN_HUM:XM_005260320,RSN_HUM:XM_005260324,RSN_HUM:XM_005260325,RSN_HUM:NM_001258330,RSN_HUM:NM_012156	0.518052	0.00129033	0.345725	0.000907948	0.00129033	0.172327
COPS2	9318	1	INTERNAL3	RSN_HUM:NM_001143887;RSN_HUM:NM_004236	0.385646	0.0059355	0.213401	0.0042282	0.0059355	0.172245
COG6	57511	2	CASSETTE	RSN_HUM:NM_001145079,RSN_HUM:NM_020751;RSN_HUM:NR_026745	0.982523	0.00165075	0.810299	0.0005282	0.00165075	0.172224
TMEM126B	55863	9	CASSETTE	RSN_HUM:NM_018480;RSN_HUM:NM_001256546	0.957266	0.00189195	0.785175	0.00052345	0.00189195	0.172091
CASP8	841	2	CASSETTE	RSN_HUM:NM_001080124,RSN_HUM:NM_001228,RSN_HUM:XM_005246892,RSN_HUM:XM_005246896,RSN_HUM:XM_005246885,RSN_HUM:NM_033356;RSN_HUM:NM_033355,RSN_HUM:XM_005246887,RSN_HUM:XM_005246888,RSN_HUM:NM_001080125,RSN_HUM:XM_005246891,RSN_HUM:XM_005246889,RSN_HUM:XM_005246886,RSN_HUM:XM_005246890	0.473611	0.00133126	0.645674	0.000167732	0.00133126	0.172063
ARMC6	93436	1	CASSETTE	RSN_HUM:NM_033415;RSN_HUM:NM_001199196	0.80302	0.00119225	0.630973	0.000113	0.00119225	0.172047
RBM23	55147	7	MUT_EXCLU	RSN_HUM:NM_001077352,RSN_HUM:NM_018107;RSN_HUM:XM_005267798,RSN_HUM:XM_005267799	0.779576	0.00281256	0.607582	0.00134022	0.00281256	0.171994
GNPDA2	132789	13	LCASSETTE	RSN_HUM:NR_073095;RSN_HUM:NM_001270881	0.0722191	0.00117282	0.243764	0.000445103	0.00117282	0.171545
RBM23	55147	2	CASSETTE	RSN_HUM:NM_001077352,RSN_HUM:NM_018107;RSN_HUM:NM_001077351,RSN_HUM:XM_005267797	0.7992	0.00414853	0.62779	0.00191028	0.00414853	0.17141
ANLN	54443	2	CASSETTE	RSN_HUM:NM_001284301;RSN_HUM:NM_018685	0.271167	0.0121987	0.0998014	0.00278954	0.0121987	0.171366
CD44	960	7	INTERNAL3	RSN_HUM:NM_000610,RSN_HUM:NM_001001389;RSN_HUM:XM_005253231,RSN_HUM:XM_005253232,RSN_HUM:XM_005253235	0.269795	3.41e-05	0.441128	0.0022014	0.0022014	0.171333
FAM160A2	84067	1	INTERNAL5	RSN_HUM:NM_001098794,RSN_HUM:XM_005253157;RSN_HUM:NM_032127	0.685489	0.0007863	0.514165	0.0015178	0.0015178	0.171324
TRA2A	29896	8	LCASSETTE	RSN_HUM:NM_013293;RSN_HUM:NM_001282759	0.976236	0.00787238	0.804928	0.00753708	0.00787238	0.171308
TCEAL8	90843	1	CASSETTE	RSN_HUM:NM_001006684;RSN_HUM:NM_153333	0.188907	0.00543124	0.0177744	0.0028918	0.00543124	0.171133
DAG1	1605	39	XCASSETTE	RSN_HUM:NM_004393;RSN_HUM:NM_001177634	0.95644	0.00299203	0.785529	0.0028997	0.00299203	0.170911
TIMM17B	10245	1	CASSETTE	RSN_HUM:NM_005834;RSN_HUM:NM_001167947	0.92554	0.00374333	0.754902	0.00132971	0.00374333	0.170638
MDM2	4193	6	CASSETTE	RSN_HUM:NM_001145340;RSN_HUM:NM_001145339,RSN_HUM:NM_002392,RSN_HUM:NM_001278462	0.380725	0.00507978	0.210129	0.0332872	0.0332872	0.170596
NME7	29922	3	CASSETTE	RSN_HUM:XM_005245106,RSN_HUM:NM_013330,RSN_HUM:NM_197972;RSN_HUM:NR_104229	0.995688	0.0015073	0.825302	0.0006869	0.0015073	0.170386
ABLIM3	22885	2	LCASSETTE	RSN_HUM:XM_005268393,RSN_HUM:XM_005268396;RSN_HUM:NM_014945,RSN_HUM:XM_005268394	0.673414	0.00137814	0.503502	0.00110705	0.00137814	0.169912
RC3H1	149041	1	INTERNAL3	RSN_HUM:NM_172071,RSN_HUM:XM_005244918,RSN_HUM:XM_005244921;RSN_HUM:XM_005244920,RSN_HUM:XM_005244919	0.419959	0.00042247	0.250274	0.00101097	0.00101097	0.169685
PPFIBP1	8496	7	CASSETTE	RSN_HUM:XM_005253508;RSN_HUM:NM_001198915,RSN_HUM:NM_001198916,RSN_HUM:NM_003622,RSN_HUM:NM_177444,RSN_HUM:XM_005253505,RSN_HUM:XM_005253507,RSN_HUM:XM_005253509,RSN_HUM:XM_005253510,RSN_HUM:XM_005253511,RSN_HUM:XM_005253514,RSN_HUM:XM_005253515,RSN_HUM:XM_005253516,RSN_HUM:XM_005253506	0.244553	0.00426166	0.0750279	0.00473424	0.00473424	0.169525
FNBP1	23048	37	MUT_EXCLU	RSN_HUM:XM_005251830;RSN_HUM:XM_005251831	0.70773	0.00164585	0.538441	0.000604346	0.00164585	0.169289
NEMF	9147	4	CASSETTE	RSN_HUM:XM_005268201;RSN_HUM:XM_005268200	0.70696	0.00216971	0.537688	0.00058175	0.00216971	0.169272
SLC25A26	115286	1	CASSETTE	RSN_HUM:NM_001164796,RSN_HUM:NR_028475;RSN_HUM:NM_173471	0.385068	0.0014587	0.554023	0.000703491	0.0014587	0.168955
LRRFIP1	9208	70	LCASSETTE	RSN_HUM:XM_005246126,RSN_HUM:XM_005246129,RSN_HUM:XM_005246131;RSN_HUM:XM_005246118,RSN_HUM:XM_005246120	0.922201	0.00060124	0.753252	0.00150667	0.00150667	0.168949
VAPA	9218	1	CASSETTE	RSN_HUM:NM_194434;RSN_HUM:NM_003574	0.966707	0.0142731	0.79825	0.00589554	0.0142731	0.168457
SMARCC2	6601	5	INTERNAL5	RSN_HUM:NM_003075;RSN_HUM:NM_139067	0.313465	0.00218547	0.145171	0.0008397	0.00218547	0.168294
KIF2A	3796	3	INTERNAL5	RSN_HUM:NM_001098511,RSN_HUM:NM_001243952,RSN_HUM:NM_004520;RSN_HUM:NM_001243953	0.472335	0.0020947	0.640582	0.0016012	0.0020947	0.168247
MTHFD2	10797	1	CASSETTE	RSN_HUM:NM_006636;RSN_HUM:NR_027405	0.792744	0.0116008	0.624589	0.0272549	0.0272549	0.168155
NRM	11270	17	CASSETTE	RSN_HUM:NM_001270710;RSN_HUM:NR_073066	0.226886	0.00175374	0.0587773	0.000663522	0.00175374	0.168109
ACTR6	64431	1	INTERNAL5	RSN_HUM:NM_022496,RSN_HUM:NR_048568;RSN_HUM:NR_048569	0.901029	0.00104475	0.733124	0.0004133	0.00104475	0.167905
NRM	11270	7	CASSETTE	RSN_HUM:NM_001270710;RSN_HUM:NM_001270708	0.246184	0.00161627	0.0783698	0.000497641	0.00161627	0.167814
DNM1L	10059	9	CASSETTE	RSN_HUM:NM_005690,RSN_HUM:XM_005253282;RSN_HUM:NM_012063	0.740988	0.00260895	0.573236	0.00096278	0.00260895	0.167752
SNX17	9784	4	CASSETTE	RSN_HUM:NM_001267061,RSN_HUM:NM_001267059,RSN_HUM:NM_001267060,RSN_HUM:NM_014748,RSN_HUM:NR_049782;RSN_HUM:NR_049784	0.983335	0.0104208	0.81559	0.00933469	0.0104208	0.167745
TJP1	7082	1	INTERNAL5	RSN_HUM:XM_005254616,RSN_HUM:XM_005254618,RSN_HUM:XM_005254619,RSN_HUM:XM_005254621;RSN_HUM:XM_005254617,RSN_HUM:XM_005254620	0.755181	0.0030884	0.587513	0.00346524	0.00346524	0.167668
RPE	6120	9	CASSETTE	RSN_HUM:NM_001278285,RSN_HUM:NM_001278289,RSN_HUM:NM_199229;RSN_HUM:NM_001278283	0.985963	0.00482127	0.818455	0.000915383	0.00482127	0.167508
HERC4	26091	2	CASSETTE	RSN_HUM:NM_001278186,RSN_HUM:NM_015601;RSN_HUM:NM_001278185,RSN_HUM:NM_022079	0.965064	0.0119762	0.797586	0.00262492	0.0119762	0.167478
STOML1	9399	5	CASSETTE	RSN_HUM:NM_001256672,RSN_HUM:NM_001256673,RSN_HUM:NM_001256674,RSN_HUM:NM_001256675,RSN_HUM:NM_004809;RSN_HUM:NM_001256677	0.985058	0.00100325	0.817682	0.0014197	0.0014197	0.167376
CD46	4179	3	LCASSETTE	RSN_HUM:NM_172350,RSN_HUM:NM_172352,RSN_HUM:NM_172353;RSN_HUM:NM_002389,RSN_HUM:NM_172359	0.241486	0.00299672	0.074491	0.00425689	0.00425689	0.166995
RBM41	55285	2	CASSETTE	RSN_HUM:NM_001171080,RSN_HUM:NM_018301,RSN_HUM:XM_005262159,RSN_HUM:XM_005262162;RSN_HUM:XM_005262160,RSN_HUM:XM_005262161	0.97746	0.00189215	0.81052	0.00026045	0.00189215	0.16694
CALCOCO1	57658	1	CASSETTE	RSN_HUM:NR_026554;RSN_HUM:NM_020898	0.465172	0.00828704	0.298305	0.00543404	0.00828704	0.166867
SMARCA4	6597	5	CASSETTE	RSN_HUM:NM_001128844,RSN_HUM:NM_003072,RSN_HUM:XM_005260031,RSN_HUM:XM_005260034,RSN_HUM:XM_005260035,RSN_HUM:NM_001128847,RSN_HUM:NM_001128848;RSN_HUM:XM_005260030,RSN_HUM:NM_001128849	0.977141	0.00518576	0.810349	0.00316002	0.00518576	0.166792
ARHGEF10	9639	2	CASSETTE	RSN_HUM:XM_005266042;RSN_HUM:NM_014629,RSN_HUM:XM_005266041,RSN_HUM:XM_005266040,RSN_HUM:XM_005266039	0.699912	0.00276135	0.533157	0.00214702	0.00276135	0.166755
BRE	9577	4	CASSETTE	RSN_HUM:NM_001261840,RSN_HUM:NM_004899,RSN_HUM:NM_199191,RSN_HUM:NM_199192;RSN_HUM:NM_199193,RSN_HUM:NM_199194	0.925342	0.0017962	0.758828	0.0011469	0.0017962	0.166514
FHOD1	29109	1	LCASSETTE	RSN_HUM:NM_013241;RSN_HUM:XM_005255909,RSN_HUM:XM_005255910	0.976109	0.0018042	0.809626	0.000637949	0.0018042	0.166483
MAP3K4	4216	2	INTERNAL5	RSN_HUM:XM_005266988,RSN_HUM:XM_005266989;RSN_HUM:NM_005922,RSN_HUM:NM_006724	0.656438	0.00102056	0.490068	0.000140117	0.00102056	0.16637
HMGN3	9324	6	CASSETTE	RSN_HUM:NM_004242;RSN_HUM:XM_005248768	0.946979	0.00273195	0.780795	0.00416153	0.00416153	0.166184
CENPE	1062	1	CASSETTE	RSN_HUM:NM_001286734;RSN_HUM:NM_001813	0.80861	0.00139845	0.64246	0.00076425	0.00139845	0.16615
SUPT20H	55578	7	INTERNAL3	RSN_HUM:NM_001014286,RSN_HUM:NM_001278480,RSN_HUM:NM_001278481,RSN_HUM:NM_001278482,RSN_HUM:NM_017569,RSN_HUM:XM_005266460,RSN_HUM:XM_005266462,RSN_HUM:XM_005266465,RSN_HUM:XM_005266466,RSN_HUM:XM_005266447,RSN_HUM:XM_005266448,RSN_HUM:XM_005266449,RSN_HUM:XM_005266450,RSN_HUM:XM_005266451,RSN_HUM:XM_005266452,RSN_HUM:XM_005266453,RSN_HUM:XM_005266454,RSN_HUM:XM_005266456,RSN_HUM:XM_005266457,RSN…	0.865569	0.00248807	0.699432	0.00265239	0.00265239	0.166137
MTIF2	4528	2	CASSETTE	RSN_HUM:NM_002453;RSN_HUM:NM_001005369	0.775541	0.00138101	0.609416	0.000584822	0.00138101	0.166125
MELK	9833	8	CASSETTE	RSN_HUM:NM_001256685,RSN_HUM:NM_001256687,RSN_HUM:NM_001256688,RSN_HUM:NM_001256689,RSN_HUM:NM_001256690,RSN_HUM:NM_001256691,RSN_HUM:NM_001256692,RSN_HUM:NM_014791;RSN_HUM:NR_046337	0.900499	0.00339444	0.734897	0.00120859	0.00339444	0.165602
SH3YL1	26751	9	CASSETTE	RSN_HUM:NM_001159597,RSN_HUM:NM_015677,RSN_HUM:NR_104223,RSN_HUM:NR_104225;RSN_HUM:NR_104226	0.874693	0.00112731	0.709357	0.00103195	0.00112731	0.165336
DSTYK	25778	1	CASSETTE	RSN_HUM:NM_199462;RSN_HUM:NM_015375	0.192164	0.0015596	0.026925	0.00134076	0.0015596	0.165239
UIMC1	51720	22	LCASSETTE	RSN_HUM:XM_005265932,RSN_HUM:XM_005265933;RSN_HUM:XM_005265934,RSN_HUM:XM_005265935	0.257928	0.00102994	0.4231	0.0011255	0.0011255	0.165172
AKAP13	11214	2	INTERNAL3	RSN_HUM:XM_005254839,RSN_HUM:XM_005254840,RSN_HUM:XM_005254842,RSN_HUM:XM_005254843,RSN_HUM:XM_005254844,RSN_HUM:XM_005254845,RSN_HUM:XM_005254846,RSN_HUM:XM_005254847,RSN_HUM:NM_006738,RSN_HUM:NM_007200,RSN_HUM:XM_005254849,RSN_HUM:XM_005254850,RSN_HUM:XM_005254852,RSN_HUM:XM_005254851,RSN_HUM:XM_005254854,RSN_HUM:XM_005254853,RSN_HUM:XM_005254855,RSN_HUM:XM_005254856,RSN_HUM:NM_001270546;RSN_HU…	0.482021	0.000945212	0.647099	0.00104845	0.00104845	0.165078
SPIRE1	56907	2	CASSETTE	RSN_HUM:NM_001128627,RSN_HUM:NM_020148,RSN_HUM:XM_005258121,RSN_HUM:XM_005258122;RSN_HUM:NM_001128626	0.988937	0.00170612	0.823983	0.00167525	0.00170612	0.164954
MBD1	4152	35	CASSETTE	RSN_HUM:NM_001204136,RSN_HUM:NM_015845,RSN_HUM:XM_005258262;RSN_HUM:NM_002384,RSN_HUM:NM_015844,RSN_HUM:NM_015846,RSN_HUM:NM_015847	0.409011	0.00149091	0.244068	0.00203673	0.00203673	0.164943
UPF3A	65110	1	CASSETTE	RSN_HUM:NM_080687;RSN_HUM:NM_023011,RSN_HUM:XM_005266200	0.686467	0.00320088	0.521723	0.0044169	0.0044169	0.164744
MFF	56947	4	LCASSETTE	RSN_HUM:NM_001277064,RSN_HUM:XM_005246687;RSN_HUM:NM_001277061,RSN_HUM:XM_005246683,RSN_HUM:NM_020194	0.519999	0.00289501	0.355276	0.00189486	0.00289501	0.164723
TP53I3	9540	2	INTERNAL5	RSN_HUM:NM_001206802,RSN_HUM:NM_147184;RSN_HUM:XM_005264650	0.934661	0.00363798	0.769974	0.0109522	0.0109522	0.164687
VIPAS39	63894	5	CASSETTE	RSN_HUM:NM_001193315,RSN_HUM:NM_001193316;RSN_HUM:NM_022067	0.907131	0.00128378	0.742531	0.000413653	0.00128378	0.1646
MATR3	9782	2	CASSETTE	RSN_HUM:NM_001282278;RSN_HUM:NM_001194954,RSN_HUM:NM_199189	0.0165461	0.00938592	0.180754	0.0115887	0.0115887	0.164208
CALCOCO1	57658	2	CASSETTE	RSN_HUM:NM_001143682;RSN_HUM:NM_020898,RSN_HUM:NR_026554	0.455412	0.00860056	0.291364	0.00574712	0.00860056	0.164048
CBFB	865	3	CASSETTE	RSN_HUM:XM_005256212;RSN_HUM:NM_022845	0.243455	0.00536772	0.0795262	0.00521086	0.00536772	0.163929
UBAP2L	9898	17	INTERNAL3	RSN_HUM:XM_005245658,RSN_HUM:XM_005245668;RSN_HUM:XM_005245669	0.713937	0.00385615	0.877824	0.0050411	0.0050411	0.163887
CHFR	55743	2	INTERNAL3	RSN_HUM:NM_001161344,RSN_HUM:NM_001161345;RSN_HUM:NM_001161346	0.203837	0.0007766	0.0399747	0.0012658	0.0012658	0.163862
NCOR1	9611	4	CASSETTE	RSN_HUM:NM_001190440,RSN_HUM:NM_006311,RSN_HUM:XM_005256874;RSN_HUM:XM_005256875,RSN_HUM:XM_005256866,RSN_HUM:XM_005256867,RSN_HUM:XM_005256868,RSN_HUM:XM_005256871,RSN_HUM:XM_005256872,RSN_HUM:XM_005256873	0.823942	0.00348301	0.66022	0.000876526	0.00348301	0.163722
DIABLO	56616	6	MUT_EXCLU	RSN_HUM:NM_001278303;RSN_HUM:NM_001278342	0.583435	0.0024217	0.746952	0.0057266	0.0057266	0.163517
MBNL1	4154	42	MUT_M_EXCLU	RSN_HUM:XM_005247465;RSN_HUM:NM_207296	0.959843	0.00121442	0.797103	0.000697423	0.00121442	0.16274
DROSHA	29102	9	CASSETTE	RSN_HUM:XM_005248294;RSN_HUM:XM_005248293	0.317654	0.00104359	0.154983	0.000187763	0.00104359	0.162671
RPAIN	84268	26	MUT_EXCLU	RSN_HUM:NR_027682;RSN_HUM:NR_027683	0.410153	0.00117104	0.57281	0.00137001	0.00137001	0.162657
MBNL2	10150	5	CASSETTE	RSN_HUM:XM_005254019,RSN_HUM:NM_207304;RSN_HUM:XM_005254020	0.996343	0.00188655	0.833759	0.00105366	0.00188655	0.162584
ARRDC1	92714	1	INTERNAL3	RSN_HUM:XM_005266121,RSN_HUM:NM_152285;RSN_HUM:XM_005266119	0.963598	0.00134607	0.80126	0.000264667	0.00134607	0.162338
POFUT2	23275	1	CASSETTE	RSN_HUM:NM_133635;RSN_HUM:NR_004858	0.940284	0.00434964	0.778032	0.00655852	0.00655852	0.162252
CLIP1	6249	6	CASSETTE	RSN_HUM:NM_198240;RSN_HUM:NM_002956	0.983739	0.00446147	0.821487	0.00301344	0.00446147	0.162252
RRBP1	6238	1	CASSETTE	RSN_HUM:NM_004587;RSN_HUM:NM_001042576	0.576792	0.0117505	0.41477	0.0206645	0.0206645	0.162022
UMPS	7372	2	CASSETTE	RSN_HUM:NM_000373;RSN_HUM:NR_033437	0.968808	0.0016767	0.806877	0.0039638	0.0039638	0.161931
NAB2	4665	1	CASSETTE	RSN_HUM:XM_005268894;RSN_HUM:NM_005967	0.186415	0.00375237	0.0245103	0.0029253	0.00375237	0.161905
FXR1	8087	8	CASSETTE	RSN_HUM:NM_001013438,RSN_HUM:NM_005087;RSN_HUM:NM_001013439	0.969562	0.0048063	0.807984	0.00579269	0.00579269	0.161578
TMEM44-AS1	100507297	1	INTERNAL3	RSN_HUM:NR_047573;RSN_HUM:NR_047574	0.480563	0.0001492	0.319123	0.0013957	0.0013957	0.16144
2002-09-01	4735	1	CASSETTE	RSN_HUM:NM_006155;RSN_HUM:NM_001008491	0.746108	0.00234698	0.584768	0.00219027	0.00234698	0.16134
CDC25C	995	6	CASSETTE	RSN_HUM:NM_022809;RSN_HUM:NM_001790	0.824052	0.00365851	0.662737	0.00046655	0.00365851	0.161315
MFF	56947	5	XCASSETTE	RSN_HUM:NM_001277065,RSN_HUM:NM_001277066,RSN_HUM:NR_102266,RSN_HUM:XM_005246688;RSN_HUM:NM_001277061,RSN_HUM:XM_005246683,RSN_HUM:NM_020194	0.563977	0.00423368	0.402736	0.00225483	0.00423368	0.161241
USP10	9100	5	MUT_M_EXCLU	RSN_HUM:NR_073577;RSN_HUM:NR_073578	0.368359	0.00448348	0.207739	0.00434948	0.00448348	0.16062
RXRB	6257	1	INTERNAL3	RSN_HUM:NM_001270401,RSN_HUM:XM_005249278;RSN_HUM:NM_021976	0.402248	0.00330418	0.241646	0.00437748	0.00437748	0.160602
LRRFIP1	9208	71	XCASSETTE	RSN_HUM:XM_005246130,RSN_HUM:NM_001137552,RSN_HUM:NM_004735;RSN_HUM:XM_005246118	0.961899	0.00092193	0.801881	0.00193014	0.00193014	0.160018
SLMAP	7871	10	XCASSETTE	RSN_HUM:XM_005265470,RSN_HUM:XM_005265471;RSN_HUM:XM_005265456,RSN_HUM:XM_005265457,RSN_HUM:XM_005265458,RSN_HUM:XM_005265468,RSN_HUM:XM_005265469	0.743842	0.00265715	0.583897	0.000904098	0.00265715	0.159945
NT5C2	22978	19	INTERNAL5	RSN_HUM:XM_005269634,RSN_HUM:XM_005269636;RSN_HUM:XM_005269640,RSN_HUM:XM_005269644	0.572166	0.00182657	0.412255	0.00133437	0.00182657	0.159911
PTK2	5747	10	CASSETTE	RSN_HUM:XM_005251013,RSN_HUM:XM_005251014;RSN_HUM:NM_001199649,RSN_HUM:NM_005607,RSN_HUM:NM_153831,RSN_HUM:XM_005251003,RSN_HUM:XM_005251004,RSN_HUM:XM_005251005,RSN_HUM:XM_005251006,RSN_HUM:XM_005251007,RSN_HUM:XM_005251008,RSN_HUM:XM_005251009,RSN_HUM:XM_005251010,RSN_HUM:XM_005251011,RSN_HUM:XM_005251012	0.232285	0.00250286	0.0724506	0.00168115	0.00250286	0.159834
DIP2C	22982	2	CASSETTE	RSN_HUM:NM_014974,RSN_HUM:XM_005252426,RSN_HUM:XM_005252430;RSN_HUM:XM_005252427,RSN_HUM:XM_005252428,RSN_HUM:XM_005252429	0.67373	0.0020057	0.51396	0.0013789	0.0020057	0.15977
YWHAE	7531	1	CASSETTE	RSN_HUM:NM_006761;RSN_HUM:NR_024058	0.958037	0.0466696	0.798422	0.0573882	0.0573882	0.159615
DROSHA	29102	7	CASSETTE	RSN_HUM:XM_005248293;RSN_HUM:NM_013235,RSN_HUM:XM_005248291,RSN_HUM:XM_005248292	0.210595	0.00129585	0.0513638	0.0002823	0.00129585	0.159231
KIAA1468	57614	3	MUT_EXCLU	RSN_HUM:XM_005266730,RSN_HUM:XM_005266731;RSN_HUM:NM_020854	0.981343	0.0016073	0.822116	0.00139494	0.0016073	0.159227
RFWD2	64326	1	CASSETTE	RSN_HUM:NM_001001740,RSN_HUM:XM_005245448;RSN_HUM:NM_001286644,RSN_HUM:NM_022457,RSN_HUM:XM_005245447	0.232052	0.00223355	0.0730141	0.000354726	0.00223355	0.159038
SLMAP	7871	19	CASSETTE	RSN_HUM:XM_005265465,RSN_HUM:XM_005265466,RSN_HUM:NM_007159;RSN_HUM:XM_005265460	0.922134	0.00180462	0.763108	0.000731875	0.00180462	0.159026
CCBL2	56267	1	CASSETTE	RSN_HUM:NM_001008662;RSN_HUM:NM_001008661	0.558185	0.00207655	0.399269	0.000888624	0.00207655	0.158916
C7orf49	78996	7	INTERNAL5	RSN_HUM:NM_001243751;RSN_HUM:NM_024033	0.838692	0.00252375	0.679813	0.00106875	0.00252375	0.158879
RBM39	9584	3	CASSETTE	RSN_HUM:NM_001242599,RSN_HUM:NM_001242600,RSN_HUM:NM_004902,RSN_HUM:NM_184234,RSN_HUM:NR_040723;RSN_HUM:NR_040722,RSN_HUM:NR_040724	0.845873	0.0101275	0.687217	0.0103862	0.0103862	0.158656
RBMS3	27303	5	CASSETTE	RSN_HUM:XM_005265060,RSN_HUM:XM_005265061,RSN_HUM:XM_005265062,RSN_HUM:NM_001003792,RSN_HUM:NM_001003793,RSN_HUM:NM_001177711,RSN_HUM:NM_014483,RSN_HUM:XM_005265064,RSN_HUM:XM_005265063,RSN_HUM:XM_005265065;RSN_HUM:NM_001177712	0.996375	0.00129653	0.837728	3.91318e-05	0.00129653	0.158647
MRPL52	122704	1	CASSETTE	RSN_HUM:XM_005267327,RSN_HUM:NM_178336,RSN_HUM:NM_180982,RSN_HUM:NM_181306,RSN_HUM:NM_181305;RSN_HUM:XM_005267328,RSN_HUM:NM_181304	0.98006	0.00762667	0.821633	0.00578808	0.00762667	0.158427
CHN1	1123	3	MUT_EXCLU	RSN_HUM:NM_001025201;RSN_HUM:NR_038133	0.0753354	0.0013288	0.23366	0.000272069	0.0013288	0.158325
FAM107B	83641	11	CASSETTE	RSN_HUM:NM_001282697;RSN_HUM:NM_001282696	0.865833	0.00043923	0.707534	0.00269556	0.00269556	0.158299
MCCC2	64087	1	CASSETTE	RSN_HUM:XM_005248567;RSN_HUM:NM_022132	0.267735	0.00157245	0.109512	0.00055245	0.00157245	0.158223
UBR4	23352	2	CASSETTE	RSN_HUM:NM_020765;RSN_HUM:XM_005245802	1	0.00132668	0.841791	0.002674	0.002674	0.158209
SECISBP2L	9728	1	CASSETTE	RSN_HUM:NM_014701;RSN_HUM:NM_001193489	0.161188	0.00150694	0.00298242	0.00335298	0.00335298	0.158206
MFF	56947	46	MUT_EXCLU	RSN_HUM:XM_005246685;RSN_HUM:NM_001277068	0.297564	0.00217167	0.45566	0.00145798	0.00217167	0.158096
MTMR3	8897	2	CASSETTE	RSN_HUM:XM_005261804;RSN_HUM:NM_021090,RSN_HUM:NM_153050,RSN_HUM:NM_153051,RSN_HUM:XM_005261803,RSN_HUM:XM_005261805,RSN_HUM:XM_005261806,RSN_HUM:XM_005261807,RSN_HUM:XM_005261808	0.209542	0.00109048	0.0514551	0.0016597	0.0016597	0.158087
BANP	54971	3	INTERNAL3	RSN_HUM:NM_001173539,RSN_HUM:NM_001173541,RSN_HUM:NM_001173543;RSN_HUM:NM_001173540,RSN_HUM:NM_017869,RSN_HUM:NM_079837,RSN_HUM:XM_005256008,RSN_HUM:XM_005256009,RSN_HUM:XM_005256010,RSN_HUM:XM_005256012,RSN_HUM:NM_001173542	0.241542	0.000519475	0.399105	0.00181192	0.00181192	0.157563
IQCE	23288	2	LCASSETTE	RSN_HUM:NM_001287501,RSN_HUM:NM_001287502;RSN_HUM:NM_001287499,RSN_HUM:NM_152558	0.264622	0.0014156	0.107087	0.0008395	0.0014156	0.157535
CLIP1	6249	3	CASSETTE	RSN_HUM:NM_001247997,RSN_HUM:NM_002956,RSN_HUM:NM_198240;RSN_HUM:XM_005253593,RSN_HUM:XM_005253594,RSN_HUM:XM_005253595	0.979353	0.00553578	0.821907	0.00592807	0.00592807	0.157446
ATG13	9776	28	INTERNAL3	RSN_HUM:XM_005253263;RSN_HUM:XM_005253266	0.794073	0.000726633	0.636764	0.0015439	0.0015439	0.157309
EIF4G3	8672	7	CASSETTE	RSN_HUM:NM_001198801,RSN_HUM:NM_003760;RSN_HUM:NM_001198803	0.912633	0.00283345	0.755353	0.00149235	0.00283345	0.15728
CSNK1A1	1452	2	CASSETTE	RSN_HUM:NM_001271741,RSN_HUM:NM_001892;RSN_HUM:NM_001025105,RSN_HUM:NM_001271742	0.856731	0.0165526	0.699643	0.00650892	0.0165526	0.157088
ITSN1	6453	2	LCASSETTE	RSN_HUM:XM_005261031;RSN_HUM:XM_005261026,RSN_HUM:XM_005261027,RSN_HUM:NM_001001132,RSN_HUM:NM_003024	0.1978	0.00240697	0.0407851	0.00131175	0.00240697	0.157015
ARHGEF1	9138	2	CASSETTE	RSN_HUM:XM_005259388,RSN_HUM:XM_005259386,RSN_HUM:XM_005259387,RSN_HUM:XM_005259390;RSN_HUM:NM_004706,RSN_HUM:NM_198977,RSN_HUM:XM_005259389,RSN_HUM:NM_199002	0.159687	0.00312548	0.316643	0.000788584	0.00312548	0.156956
SAR1B	51128	1	CASSETTE	RSN_HUM:NM_016103;RSN_HUM:NM_001033503	0.873788	0.00365558	0.717026	0.0026589	0.00365558	0.156762
ENAH	55740	1	CASSETTE	RSN_HUM:NM_018212;RSN_HUM:NM_001008493	0.983189	0.0153052	0.82645	0.0174111	0.0174111	0.156739
CCT7	10574	9	CASSETTE	RSN_HUM:NM_006429,RSN_HUM:NR_029402,RSN_HUM:NR_029403;RSN_HUM:NM_001166285	0.984019	0.0134126	0.827662	0.0156516	0.0156516	0.156357
DNM2	1785	2	CASSETTE	RSN_HUM:NM_001005362,RSN_HUM:NM_004945;RSN_HUM:NM_001005360,RSN_HUM:NM_001005361,RSN_HUM:NM_001190716	0.741351	0.00628	0.585047	0.00585372	0.00628	0.156304
IQCB1	9657	3	CASSETTE	RSN_HUM:XM_005247912;RSN_HUM:NM_001023570,RSN_HUM:NM_001023571,RSN_HUM:XM_005247911,RSN_HUM:XM_005247913	0.306519	0.000926207	0.15036	0.00214951	0.00214951	0.156159
SYNRG	11276	12	CASSETTE	RSN_HUM:NM_007247,RSN_HUM:XM_005256988;RSN_HUM:XM_005256982,RSN_HUM:XM_005256980,RSN_HUM:XM_005256981,RSN_HUM:XM_005256983,RSN_HUM:XM_005256985,RSN_HUM:XM_005256986	0.343706	0.000830652	0.187721	0.00133336	0.00133336	0.155985
GGCT	79017	7	MUT_EXCLU	RSN_HUM:NM_001199816;RSN_HUM:NR_037669	0.311392	0.00239531	0.467321	0.00181917	0.00239531	0.155929
RAI14	26064	1	CASSETTE	RSN_HUM:NM_001145522;RSN_HUM:NM_015577,RSN_HUM:NM_001145520,RSN_HUM:NM_001145521,RSN_HUM:NM_001145525,RSN_HUM:NM_001145523	0.837977	0.00748565	0.682091	0.0112819	0.0112819	0.155886
ZNF655	79027	9	LCASSETTE	RSN_HUM:NM_001085366,RSN_HUM:NM_001009958;RSN_HUM:NM_024061,RSN_HUM:NM_001085367	0.271636	0.00185818	0.116062	0.00201745	0.00201745	0.155574
BPTF	2186	6	CASSETTE	RSN_HUM:XM_005257156;RSN_HUM:XM_005257150,RSN_HUM:XM_005257151,RSN_HUM:XM_005257152,RSN_HUM:XM_005257153,RSN_HUM:XM_005257154,RSN_HUM:XM_005257159,RSN_HUM:XM_005257160,RSN_HUM:XM_005257161,RSN_HUM:XM_005257162,RSN_HUM:NM_004459	0.17434	0.00113227	0.0189187	0.000486291	0.00113227	0.155421
EPB41L1	2036	3	CASSETTE	RSN_HUM:NM_001258331,RSN_HUM:XM_005260320,RSN_HUM:XM_005260321,RSN_HUM:XM_005260323,RSN_HUM:XM_005260325,RSN_HUM:NM_001258330,RSN_HUM:NM_177996;RSN_HUM:XM_005260319,RSN_HUM:XM_005260324,RSN_HUM:NM_001258329,RSN_HUM:NM_012156	0.985115	0.00232591	0.829726	0.0020983	0.00232591	0.155389
EVI5L	115704	1	CASSETTE	RSN_HUM:NM_145245;RSN_HUM:NM_001159944	0.396888	0.00202425	0.241921	0.00235035	0.00235035	0.154967
BNIP1	662	2	CASSETTE	RSN_HUM:NM_001205,RSN_HUM:NM_013978;RSN_HUM:NM_013979,RSN_HUM:NM_013980	0.839751	0.00100453	0.684847	8.8852e-05	0.00100453	0.154904
GUK1	2987	5	CASSETTE	RSN_HUM:NM_001159390,RSN_HUM:NM_001242840;RSN_HUM:NM_000858	0.847299	0.0112597	0.692398	0.0112783	0.0112783	0.154901
HMOX2	3163	12	CASSETTE	RSN_HUM:NM_002134;RSN_HUM:NM_001127204	0.847021	0.0029357	0.692122	0.0016539	0.0029357	0.154899
INPP4A	3631	1	CASSETTE	RSN_HUM:NM_001134225;RSN_HUM:NM_001134224,RSN_HUM:NM_001566,RSN_HUM:NM_004027	0.99028	0.0016049	0.835442	0.00112779	0.0016049	0.154838
LAMTOR3	8649	2	CASSETTE	RSN_HUM:NR_024170;RSN_HUM:NM_001243736,RSN_HUM:NM_021970	0.159904	0.00257092	0.00509206	0.00447756	0.00447756	0.154812
USP3	9960	5	CASSETTE	RSN_HUM:NM_006537,RSN_HUM:NR_046341;RSN_HUM:NR_046342	0.948228	0.00175675	0.793673	0.000708825	0.00175675	0.154555
ODF2L	57489	1	CASSETTE	RSN_HUM:NM_001184766,RSN_HUM:NM_020729;RSN_HUM:NM_001184765,RSN_HUM:NM_001007022	0.956187	0.00164562	0.801873	0.000427125	0.00164562	0.154314
NEDD1	121441	2	CASSETTE	RSN_HUM:NM_001135176;RSN_HUM:NM_152905	0.239548	0.00140515	0.393816	0.00039587	0.00140515	0.154268
WDR13	64743	1	INTERNAL3	RSN_HUM:NM_017883;RSN_HUM:NR_029427	0.760529	0.00250865	0.606287	0.00188195	0.00250865	0.154242
OSBPL3	26031	1	CASSETTE	RSN_HUM:NM_145320,RSN_HUM:NM_145322,RSN_HUM:NR_104112;RSN_HUM:NM_015550,RSN_HUM:NM_145321,RSN_HUM:NR_104111,RSN_HUM:XM_005249698	0.346493	0.00270751	0.192342	0.00160166	0.00270751	0.154151
MYO6	4646	1	CASSETTE	RSN_HUM:XM_005248720,RSN_HUM:XM_005248722,RSN_HUM:XM_005248726;RSN_HUM:XM_005248719,RSN_HUM:XM_005248721,RSN_HUM:XM_005248724,RSN_HUM:XM_005248725,RSN_HUM:NM_004999	0.980566	0.00152823	0.826515	0.00057325	0.00152823	0.154051
MRPL10	124995	1	CASSETTE	RSN_HUM:NM_145255;RSN_HUM:NM_148887	0.945108	0.00358975	0.791149	0.00824942	0.00824942	0.153959
MBNL1	4154	43	MUT_M_EXCLU	RSN_HUM:XM_005247467;RSN_HUM:NM_207296	0.95737	0.00114397	0.803431	0.000719878	0.00114397	0.153939
URI1	8725	9	CASSETTE	RSN_HUM:NR_045557;RSN_HUM:NM_003796	0.353779	0.00205326	0.19996	0.00138678	0.00205326	0.153819
AMBRA1	55626	12	CASSETTE	RSN_HUM:XM_005253011;RSN_HUM:XM_005253009	0.401483	0.00068222	0.247901	0.00133965	0.00133965	0.153582
AMBRA1	55626	7	CASSETTE	RSN_HUM:NM_001267783;RSN_HUM:NM_017749,RSN_HUM:XM_005253014	0.401483	0.00068222	0.247901	0.00133965	0.00133965	0.153582
ALG9	79796	2	INTERNAL3	RSN_HUM:NM_001077690,RSN_HUM:NM_001077692;RSN_HUM:NM_001077691,RSN_HUM:NM_024740	0.777201	0.001908	0.930603	0.0002637	0.001908	0.153402
CAPRIN2	65981	6	CASSETTE	RSN_HUM:NM_001206856;RSN_HUM:NM_001002259,RSN_HUM:NR_038177,RSN_HUM:NM_032156	0.232493	0.000793572	0.0791178	0.00193383	0.00193383	0.153375
AURKA	6790	17	CASSETTE	RSN_HUM:NM_198437;RSN_HUM:NM_198436	0.479621	0.00139235	0.632816	0.000382733	0.00139235	0.153195
DEF8	54849	20	CASSETTE	RSN_HUM:NM_001242821;RSN_HUM:NM_001242822	0.597539	0.00187787	0.444393	0.00191149	0.00191149	0.153146
LRRFIP1	9208	83	XCASSETTE	RSN_HUM:XM_005246130,RSN_HUM:NM_001137552,RSN_HUM:NM_004735;RSN_HUM:XM_005246122	0.969185	0.000915	0.816063	0.0018966	0.0018966	0.153122
ETHE1	23474	2	CASSETTE	RSN_HUM:XM_005258688;RSN_HUM:NM_014297,RSN_HUM:XM_005258687	0.100564	0.00614235	0.253637	0.00803788	0.00803788	0.153073
GOLGA2	2801	1	CASSETTE	RSN_HUM:NM_004486,RSN_HUM:XM_005251932;RSN_HUM:XM_005251930,RSN_HUM:XM_005251931	0.172544	0.00428122	0.0195257	0.00667838	0.00667838	0.153018
USF1	7391	2	INTERNAL5	RSN_HUM:NM_001276373,RSN_HUM:NM_007122;RSN_HUM:NM_207005	0.662196	0.00199435	0.509419	0.00123935	0.00199435	0.152777
FANCE	2178	4	CASSETTE	RSN_HUM:XM_005248886;RSN_HUM:XM_005248887,RSN_HUM:XM_005248888,RSN_HUM:NM_021922	0.218959	0.000543938	0.0665816	0.00114596	0.00114596	0.152377
RWDD3	25950	3	MUT_M_EXCLU	RSN_HUM:NM_001128142;RSN_HUM:NR_103484	0.629368	0.00125624	0.477241	0.000390887	0.00125624	0.152127
GMPR2	51292	3	INTERNAL5	RSN_HUM:NM_001002001,RSN_HUM:NM_001002000,RSN_HUM:XM_005267740,RSN_HUM:XM_005267741,RSN_HUM:NM_001002002,RSN_HUM:XM_005267742;RSN_HUM:NR_104265	0.973065	0.00300352	0.820947	0.000777424	0.00300352	0.152118
SEC24D	9871	1	INTERNAL3	RSN_HUM:NM_014822;RSN_HUM:XM_005263378,RSN_HUM:XM_005263379	0.68816	0.010194	0.840111	0.0111215	0.0111215	0.151951
KIF23	9493	2	MUT_EXCLU	RSN_HUM:NM_001281301,RSN_HUM:XM_005254798;RSN_HUM:NM_004856,RSN_HUM:XM_005254799	0.210366	0.00537145	0.36225	0.00335738	0.00537145	0.151884
MPP5	64398	1	INTERNAL3	RSN_HUM:NM_001256550,RSN_HUM:XM_005268003;RSN_HUM:NM_022474	0.387182	0.00141135	0.538835	0.00045255	0.00141135	0.151653
DEF8	54849	1	INTERNAL3	RSN_HUM:XM_005256316,RSN_HUM:NM_001242816,RSN_HUM:NM_001242817,RSN_HUM:NM_001242818,RSN_HUM:NM_001242820,RSN_HUM:NM_207514;RSN_HUM:XM_005256318,RSN_HUM:NM_001242819	0.751928	0.0007522	0.600281	0.0012081	0.0012081	0.151647
BIN1	274	6	CASSETTE	RSN_HUM:NM_004305,RSN_HUM:NM_139350,RSN_HUM:XM_005263646;RSN_HUM:NM_139346,RSN_HUM:NM_139348	0.342248	0.00121301	0.190635	0.000619509	0.00121301	0.151613
NSFL1C	55968	1	CASSETTE	RSN_HUM:NM_016143,RSN_HUM:NM_018839;RSN_HUM:NM_001206736	0.67843	0.00448041	0.526818	0.000690466	0.00448041	0.151612
TTC3	7267	13	LCASSETTE	RSN_HUM:NM_001001894,RSN_HUM:XM_005261047,RSN_HUM:XM_005261051,RSN_HUM:NM_003316;RSN_HUM:XM_005261058	0.946925	0.00806209	0.795385	0.00864452	0.00864452	0.15154
SYNC	81493	1	CASSETTE	RSN_HUM:NM_001161708;RSN_HUM:NM_030786	0.338606	0.0057019	0.187386	0.001316	0.0057019	0.15122
DEF8	54849	9	CASSETTE	RSN_HUM:NM_001242821;RSN_HUM:NM_001242816,RSN_HUM:NM_001242818,RSN_HUM:NM_017702	0.579483	0.00193638	0.428428	0.00198272	0.00198272	0.151055
SEC31A	22872	12	INTERNAL5	RSN_HUM:XM_005262847,RSN_HUM:XM_005262851;RSN_HUM:XM_005262849	0.735606	0.000396	0.886504	0.0021851	0.0021851	0.150898
PES1	23481	2	INTERNAL3	RSN_HUM:NM_001243225;RSN_HUM:NM_001282327,RSN_HUM:NM_001282328,RSN_HUM:NM_014303	0.0955771	0.0042981	0.24643	0.0044885	0.0044885	0.150853
NRM	11270	3	LCASSETTE	RSN_HUM:NM_001270710;RSN_HUM:NM_001270707	0.206539	0.00192651	0.055809	0.000698811	0.00192651	0.15073
FLNB	2317	1	CASSETTE	RSN_HUM:NM_001164318,RSN_HUM:NM_001164319,RSN_HUM:NM_001457;RSN_HUM:NM_001164317,RSN_HUM:XM_005264977,RSN_HUM:XM_005264978,RSN_HUM:XM_005264981,RSN_HUM:XM_005264982	0.977919	0.00666877	0.827207	0.00351895	0.00666877	0.150712
ZNF146	7705	4	CASSETTE	RSN_HUM:NM_001099638;RSN_HUM:NM_007145	0.232809	0.00267558	0.0821938	0.0027496	0.0027496	0.150615
DCTN2	10540	1	CASSETTE	RSN_HUM:NM_001261413;RSN_HUM:NM_001261412	0.879071	0.0120471	0.72848	0.00793642	0.0120471	0.150591
SP100	6672	1	CASSETTE	RSN_HUM:NM_001206703;RSN_HUM:NM_001080391,RSN_HUM:NM_001206701,RSN_HUM:NM_001206702,RSN_HUM:NM_003113	0.170151	0.0040558	0.0199456	0.00126845	0.0040558	0.150205
NOL8	55035	3	INTERNAL3	RSN_HUM:NM_001256394,RSN_HUM:NM_017948;RSN_HUM:NR_046106	0.994303	0.001615	0.844207	0.000889	0.001615	0.150096
PHYHD1	254295	1	CASSETTE	RSN_HUM:NM_174933;RSN_HUM:NM_001100876	0.178629	0.00106477	0.028703	0.000982474	0.00106477	0.149926
SERF1B	728492	2	MUT_EXCLU	RSN_HUM:NM_001178087;RSN_HUM:NM_022978	0.711213	0.00125147	0.861016	0.000660915	0.00125147	0.149803
NRM	11270	11	CASSETTE	RSN_HUM:NM_001270710;RSN_HUM:NM_001270709	0.219028	0.00181666	0.0693062	0.00056272	0.00181666	0.149722
ATRX	546	1	CASSETTE	RSN_HUM:NM_138270;RSN_HUM:NM_000489,RSN_HUM:XM_005262154,RSN_HUM:XM_005262155,RSN_HUM:XM_005262156	0.22018	0.00102462	0.0705597	0.000356436	0.00102462	0.14962
SPIDR	23514	8	INTERNAL5	RSN_HUM:NM_001080394,RSN_HUM:NM_001282916,RSN_HUM:NR_104581,RSN_HUM:XM_005251198,RSN_HUM:XM_005251195,RSN_HUM:XM_005251199,RSN_HUM:XM_005251196,RSN_HUM:XM_005251197,RSN_HUM:XM_005251201;RSN_HUM:XM_005251189	0.950051	0.0015636	0.800493	0.0012571	0.0015636	0.149558
EPB41L3	23136	9	INTERNAL3	RSN_HUM:NM_001281533,RSN_HUM:NM_001281534,RSN_HUM:NM_001281535,RSN_HUM:XM_005258085,RSN_HUM:XM_005258086,RSN_HUM:XM_005258087,RSN_HUM:XM_005258089,RSN_HUM:XM_005258090;RSN_HUM:XM_005258088	0.928683	0.00369336	0.779129	0.00300516	0.00369336	0.149554
SRSF2	6427	1	CASSETTE	RSN_HUM:NM_001195427;RSN_HUM:NR_036608	0.987952	0.0492456	0.838462	0.0120659	0.0492456	0.14949
BANP	54971	2	CASSETTE	RSN_HUM:NM_001173540,RSN_HUM:NM_001173541,RSN_HUM:NM_017869,RSN_HUM:NM_079837,RSN_HUM:XM_005256012;RSN_HUM:NM_001173539,RSN_HUM:XM_005256008,RSN_HUM:XM_005256009,RSN_HUM:XM_005256010,RSN_HUM:NM_001173542	0.440125	0.000723886	0.290856	0.00153301	0.00153301	0.149269
IKBKE	9641	1	CASSETTE	RSN_HUM:NM_001193321;RSN_HUM:NM_001193322,RSN_HUM:NM_014002	0.525207	0.00161784	0.67404	0.000148062	0.00161784	0.148833
MOK	5891	8	CASSETTE	RSN_HUM:NR_073541,RSN_HUM:NR_073542;RSN_HUM:NM_001272011,RSN_HUM:NM_014226	0.496025	0.00282368	0.347201	0.00150704	0.00282368	0.148824
NOP9	161424	1	INTERNAL3	RSN_HUM:NM_001286367,RSN_HUM:NM_174913;RSN_HUM:XM_005267385	0.901205	0.0020173	0.752459	0.000671	0.0020173	0.148746
MELK	9833	13	CASSETTE	RSN_HUM:NM_001256692,RSN_HUM:NM_001256693;RSN_HUM:NM_001256689,RSN_HUM:NM_001256691,RSN_HUM:NR_046337	0.17113	0.00122276	0.31975	0.00022674	0.00122276	0.14862
SLC39A9	55334	2	CASSETTE	RSN_HUM:NM_001252151,RSN_HUM:NM_001252148,RSN_HUM:NM_001252150,RSN_HUM:NM_018375;RSN_HUM:NM_001252152	0.969386	0.00251894	0.820991	0.00219278	0.00251894	0.148395
MARK3	4140	8	MUT_EXCLU	RSN_HUM:NM_001128919;RSN_HUM:NM_001128921,RSN_HUM:XM_005267641	0.296571	0.00394722	0.444909	0.00603913	0.00603913	0.148338
HMGN3	9324	1	CASSETTE	RSN_HUM:NM_004242;RSN_HUM:NM_001201363	0.954826	0.0027095	0.806533	0.00402873	0.00402873	0.148293
ISOC2	79763	1	CASSETTE	RSN_HUM:NM_001136202;RSN_HUM:NM_001136201	0.324138	0.00477884	0.176082	0.00251587	0.00477884	0.148056
RPAIN	84268	13	CASSETTE	RSN_HUM:NM_001160266;RSN_HUM:NM_001160244	0.162199	0.000663384	0.309988	0.00107875	0.00107875	0.147789
LUC7L2	51631	3	CASSETTE	RSN_HUM:NM_016019;RSN_HUM:NM_001270643	0.977678	0.00281555	0.829894	0.0001599	0.00281555	0.147784
FBRSL1	57666	13	MUT_EXCLU	RSN_HUM:XM_005266174,RSN_HUM:NM_001142641;RSN_HUM:XM_005266176	0.450815	0.000699637	0.598597	0.00101821	0.00101821	0.147782
HDAC2	3066	1	CASSETTE	RSN_HUM:NM_001527;RSN_HUM:NR_033441	0.993549	0.00341815	0.845789	0.00248005	0.00341815	0.14776
GALK2	2585	1	CASSETTE	RSN_HUM:XM_005254284;RSN_HUM:NM_001001556,RSN_HUM:XM_005254280,RSN_HUM:NM_001289031,RSN_HUM:NM_001289030,RSN_HUM:NM_002044,RSN_HUM:XM_005254279	0.198352	0.00121955	0.0506383	0.000359412	0.00121955	0.147714
PDLIM5	10611	20	MUT_M_EXCLU	RSN_HUM:NM_001011516;RSN_HUM:NM_001256428,RSN_HUM:NM_006457,RSN_HUM:XM_005262695	0.00696696	0.00191908	0.154614	0.00227857	0.00227857	0.147647
PRKAR1A	5573	9	CASSETTE	RSN_HUM:NM_002734;RSN_HUM:NM_001276289	0.981748	0.00759698	0.834114	0.00510386	0.00759698	0.147634
APTX	54840	13	MUT_EXCLU	RSN_HUM:NM_001195252;RSN_HUM:NR_036577	0.233132	0.00164647	0.0855126	0.00163668	0.00164647	0.147619
CBLL1	79872	1	INTERNAL3	RSN_HUM:NM_001284291;RSN_HUM:NM_024814	0.132347	0.0010208	0.279863	0.0003491	0.0010208	0.147516
NRM	11270	16	LCASSETTE	RSN_HUM:NM_001270710;RSN_HUM:NR_073065	0.199442	0.00199507	0.0519871	0.000750186	0.00199507	0.147455
FNBP1	23048	12	CASSETTE	RSN_HUM:XM_005251824,RSN_HUM:XM_005251822,RSN_HUM:XM_005251823;RSN_HUM:NM_015033,RSN_HUM:XM_005251820,RSN_HUM:XM_005251821	0.803107	0.00252724	0.655676	0.00087744	0.00252724	0.147431
FNBP1	23048	19	CASSETTE	RSN_HUM:XM_005251827,RSN_HUM:XM_005251828;RSN_HUM:XM_005251826,RSN_HUM:XM_005251825	0.803107	0.00252724	0.655676	0.00087744	0.00252724	0.147431
FNBP1	23048	35	CASSETTE	RSN_HUM:XM_005251830;RSN_HUM:XM_005251829	0.803107	0.00252724	0.655676	0.00087744	0.00252724	0.147431
MBNL2	10150	7	MUT_EXCLU	RSN_HUM:XM_005254020;RSN_HUM:XM_005254021,RSN_HUM:XM_005254022	0.00763607	0.00140311	0.155018	0.00175458	0.00175458	0.147382
USP16	10600	2	INTERNAL3	RSN_HUM:NM_001001992;RSN_HUM:NM_001032410,RSN_HUM:NM_006447	0.433857	0.0032944	0.581089	0.0015409	0.0032944	0.147232
FAIM	55179	2	CASSETTE	RSN_HUM:NM_001033032;RSN_HUM:NM_001033030	0.9775	0.00129596	0.830402	0.000120905	0.00129596	0.147098
NF2	4771	1	CASSETTE	RSN_HUM:NM_000268;RSN_HUM:NM_016418,RSN_HUM:NM_181828,RSN_HUM:NM_181829,RSN_HUM:NM_181830	0.416237	0.00356792	0.269424	0.0023862	0.00356792	0.146813
LRRFIP1	9208	6	LCASSETTE	RSN_HUM:XM_005246139,RSN_HUM:XM_005246140,RSN_HUM:XM_005246136,RSN_HUM:XM_005246142,RSN_HUM:XM_005246123,RSN_HUM:XM_005246127,RSN_HUM:XM_005246131,RSN_HUM:XM_005246141,RSN_HUM:NM_001137551,RSN_HUM:NM_001137552,RSN_HUM:NM_001137553,RSN_HUM:NM_004735;RSN_HUM:NM_001137550,RSN_HUM:XM_005246128,RSN_HUM:XM_005246137,RSN_HUM:XM_005246134,RSN_HUM:XM_005246138,RSN_HUM:XM_005246112,RSN_HUM:XM_005246114,RSN…	0.982531	0.00876144	0.835763	0.00886855	0.00886855	0.146768
SCML1	6322	2	CASSETTE	RSN_HUM:NM_001037535;RSN_HUM:NM_006746	0.951425	0.00112936	0.804927	0.0010642	0.00112936	0.146498
RNF14	9604	3	CASSETTE	RSN_HUM:XM_005268540,RSN_HUM:NM_183398,RSN_HUM:XM_005268541,RSN_HUM:XM_005268539;RSN_HUM:NM_001201365,RSN_HUM:NM_183399,RSN_HUM:NM_004290,RSN_HUM:NM_183400,RSN_HUM:NM_183401,RSN_HUM:XM_005268536,RSN_HUM:XM_005268537,RSN_HUM:XM_005268538	0.19908	0.00426789	0.0526608	0.00504407	0.00504407	0.146419
ZDHHC16	84287	3	CASSETTE	RSN_HUM:NM_198043,RSN_HUM:NM_198045;RSN_HUM:NM_001287803,RSN_HUM:NM_032327,RSN_HUM:NM_198046,RSN_HUM:NR_109895	0.523672	0.00418086	0.377328	0.00142793	0.00418086	0.146344
ZNF746	155061	1	INTERNAL3	RSN_HUM:NM_152557,RSN_HUM:NM_001163474;RSN_HUM:XM_005249956,RSN_HUM:XM_005249955,RSN_HUM:XM_005249957	0.41627	0.0011567	0.562424	0.0019736	0.0019736	0.146154
MBNL2	10150	2	CASSETTE	RSN_HUM:XM_005254020,RSN_HUM:XM_005254022,RSN_HUM:NM_144778,RSN_HUM:NM_207304;RSN_HUM:XM_005254018,RSN_HUM:XM_005254019,RSN_HUM:XM_005254021	0.972525	0.0027097	0.826392	0.00205447	0.0027097	0.146133
SMARCA4	6597	4	CASSETTE	RSN_HUM:XM_005260030,RSN_HUM:XM_005260032,RSN_HUM:XM_005260033,RSN_HUM:XM_005260034,RSN_HUM:XM_005260035,RSN_HUM:NM_001128845,RSN_HUM:NM_001128846,RSN_HUM:NM_001128847,RSN_HUM:NM_001128848;RSN_HUM:NM_001128844,RSN_HUM:NM_003072,RSN_HUM:XM_005260028,RSN_HUM:XM_005260031,RSN_HUM:NM_001128849	0.954713	0.00608032	0.808696	0.00396806	0.00608032	0.146017
UPP1	7378	2	XCASSETTE	RSN_HUM:NM_001287428,RSN_HUM:NM_001287429,RSN_HUM:NM_001287430;RSN_HUM:NM_001287426,RSN_HUM:NM_003364	0.59123	0.00205837	0.445396	0.0233205	0.0233205	0.145834
ARHGEF12	23365	1	CASSETTE	RSN_HUM:NM_001198665;RSN_HUM:NM_015313	0.546165	0.00445268	0.400432	0.00277525	0.00445268	0.145733
RCC1	1104	5	CASSETTE	RSN_HUM:NM_001048199,RSN_HUM:NR_030725,RSN_HUM:NR_030726,RSN_HUM:NM_001269;RSN_HUM:NM_001048195	0.762804	0.0028526	0.617333	0.0166808	0.0166808	0.145471
PHF6	84295	1	INTERNAL3	RSN_HUM:NM_001015877,RSN_HUM:NM_032458;RSN_HUM:NM_032335	0.831751	0.0019281	0.68628	0.0010758	0.0019281	0.145471
ASPH	444	3	CASSETTE	RSN_HUM:NM_001164750,RSN_HUM:NM_004318,RSN_HUM:XM_005251242,RSN_HUM:XM_005251246,RSN_HUM:XM_005251248,RSN_HUM:XM_005251250,RSN_HUM:NM_001164754,RSN_HUM:NM_001164755,RSN_HUM:NM_032466,RSN_HUM:NM_032467;RSN_HUM:XM_005251235,RSN_HUM:XM_005251236,RSN_HUM:XM_005251238,RSN_HUM:XM_005251239,RSN_HUM:XM_005251240,RSN_HUM:XM_005251241,RSN_HUM:XM_005251243,RSN_HUM:XM_005251244,RSN_HUM:XM_005251247,RSN_HUM:X…	0.954594	0.0262035	0.80917	0.0193133	0.0262035	0.145424
MBNL1	4154	31	MUT_M_EXCLU	RSN_HUM:XM_005247457,RSN_HUM:XM_005247461,RSN_HUM:XM_005247462,RSN_HUM:XM_005247463,RSN_HUM:XM_005247465,RSN_HUM:XM_005247467,RSN_HUM:XM_005247468;RSN_HUM:XM_005247472	0.994559	0.00447166	0.849227	0.00159416	0.00447166	0.145332
CHEK1	1111	2	CASSETTE	RSN_HUM:NR_045204;RSN_HUM:NM_001114121,RSN_HUM:NM_001114122,RSN_HUM:NM_001244846,RSN_HUM:NR_045205,RSN_HUM:NM_001274	0.706333	0.00638215	0.561077	0.00222251	0.00638215	0.145256
ANAPC10	10393	6	CASSETTE	RSN_HUM:NM_001256712,RSN_HUM:NR_046345;RSN_HUM:NM_001256706,RSN_HUM:NM_001256707,RSN_HUM:NM_001256708,RSN_HUM:NM_001256709,RSN_HUM:NM_014885	0.233135	0.00137145	0.0879675	0.000960959	0.00137145	0.145168
MRPL33	9553	1	CASSETTE	RSN_HUM:NM_145330;RSN_HUM:NM_004891	0.493985	0.0109764	0.348912	0.00412024	0.0109764	0.145073
RPS24	6229	7	MUT_EXCLU	RSN_HUM:NM_001142282;RSN_HUM:NM_001142284	0.546299	0.000915608	0.401286	0.00224766	0.00224766	0.145013
LMBR1	64327	2	CASSETTE	RSN_HUM:NM_022458,RSN_HUM:XM_005249555,RSN_HUM:XM_005249558;RSN_HUM:XM_005249556,RSN_HUM:XM_005249559	0.948653	0.00163786	0.803693	0.00154146	0.00163786	0.14496
BRF1	2972	1	INTERNAL3	RSN_HUM:NM_001242786;RSN_HUM:NM_001242787,RSN_HUM:NM_001242788,RSN_HUM:NM_001242789,RSN_HUM:NM_001519,RSN_HUM:NM_145685,RSN_HUM:XM_005267563	0.0150258	0.00118463	0.159936	0.000397033	0.00118463	0.14491
PPP2R1B	5519	4	LCASSETTE	RSN_HUM:NM_001177563;RSN_HUM:NM_181699,RSN_HUM:NM_001177562,RSN_HUM:NM_002716	0.118398	0.00156084	0.263213	0.000825187	0.00156084	0.144815
POM121	9883	3	CASSETTE	RSN_HUM:XM_005250729,RSN_HUM:XM_005250728,RSN_HUM:XM_005250731,RSN_HUM:XM_005250730,RSN_HUM:NM_172020;RSN_HUM:NM_001257190	0.842637	0.00143241	0.697921	0.00176183	0.00176183	0.144716
ICOSLG	23308	3	INTERNAL3	RSN_HUM:NM_001283050,RSN_HUM:NM_015259,RSN_HUM:XM_005261098;RSN_HUM:NM_001283052	1	9.4e-06	0.855812	0.00717536	0.00717536	0.144188
HNRNPC	3183	2	CASSETTE	RSN_HUM:NM_001077442,RSN_HUM:NM_001077443;RSN_HUM:NM_004500,RSN_HUM:NM_031314	0.285831	0.0411362	0.141898	0.0562959	0.0562959	0.143933
LRRFIP2	9209	18	CASSETTE	RSN_HUM:NM_001282691;RSN_HUM:NM_006309,RSN_HUM:XM_005265538,RSN_HUM:XM_005265539,RSN_HUM:XM_005265540,RSN_HUM:XM_005265551	0.998677	0.000330712	0.854748	0.0045765	0.0045765	0.143929
AUH	549	4	CASSETTE	RSN_HUM:XM_005252068;RSN_HUM:NM_001698,RSN_HUM:XM_005252066,RSN_HUM:XM_005252067,RSN_HUM:XM_005252069,RSN_HUM:XM_005252072	0.445134	0.00160637	0.301217	0.00038278	0.00160637	0.143917
LINC00339	29092	10	CASSETTE	RSN_HUM:NR_023919;RSN_HUM:NR_109762	0.925046	0.00084385	0.781342	0.00146108	0.00146108	0.143704
ORAI2	80228	5	CASSETTE	RSN_HUM:NM_032831;RSN_HUM:NM_001271818	0.194099	0.00165019	0.0505389	0.00100121	0.00165019	0.14356
COQ6	51004	5	CASSETTE	RSN_HUM:XM_005267716,RSN_HUM:XM_005267719;RSN_HUM:NM_182480,RSN_HUM:NM_182476,RSN_HUM:XM_005267718,RSN_HUM:XM_005267720	0.326536	0.00135958	0.183029	0.00176147	0.00176147	0.143507
MICAL3	57553	3	XCASSETTE	RSN_HUM:NM_015241,RSN_HUM:XM_005261262,RSN_HUM:NM_001122731;RSN_HUM:NM_001136004	0.996956	0.00112232	0.853699	0.000664637	0.00112232	0.143257
UPP1	7378	3	LCASSETTE	RSN_HUM:NM_001287428,RSN_HUM:NM_001287429,RSN_HUM:NM_001287430;RSN_HUM:XM_005249838	0.682751	0.00178245	0.539652	0.0192473	0.0192473	0.143099
FIP1L1	81608	5	CASSETTE	RSN_HUM:XM_005265775,RSN_HUM:XM_005265777,RSN_HUM:XM_005265780,RSN_HUM:XM_005265781,RSN_HUM:XM_005265782,RSN_HUM:NM_001134938;RSN_HUM:XM_005265768,RSN_HUM:XM_005265778,RSN_HUM:XM_005265770,RSN_HUM:XM_005265771,RSN_HUM:XM_005265772,RSN_HUM:XM_005265776,RSN_HUM:XM_005265779,RSN_HUM:XM_005265769,RSN_HUM:XM_005265773,RSN_HUM:XM_005265774,RSN_HUM:NM_001134937,RSN_HUM:NM_030917	0.38164	0.00597444	0.238557	0.00230672	0.00597444	0.143083
PSMG1	8624	2	CASSETTE	RSN_HUM:NM_203433;RSN_HUM:NM_001261824	0.16125	0.00183193	0.30431	0.0003457	0.00183193	0.14306
RNF126	55658	1	INTERNAL5	RSN_HUM:NM_194460;RSN_HUM:XM_005259594	0.890473	0.002939	0.747415	0.0019245	0.002939	0.143058
MBNL1	4154	5	CASSETTE	RSN_HUM:XM_005247465,RSN_HUM:XM_005247471,RSN_HUM:NM_207297;RSN_HUM:XM_005247475,RSN_HUM:NM_021038,RSN_HUM:XM_005247457,RSN_HUM:XM_005247462,RSN_HUM:XM_005247464,RSN_HUM:XM_005247469,RSN_HUM:XM_005247472,RSN_HUM:XM_005247477,RSN_HUM:XM_005247460,RSN_HUM:XM_005247459,RSN_HUM:XM_005247458,RSN_HUM:NM_207295,RSN_HUM:XM_005247473,RSN_HUM:XM_005247470,RSN_HUM:XM_005247474,RSN_HUM:XM_005247476	0.224403	0.0061403	0.0814279	0.00316271	0.0061403	0.142975
EPHB2	2048	1	INTERNAL3	RSN_HUM:NM_004442;RSN_HUM:NM_017449	0.0259219	0.000398633	0.168805	0.0013015	0.0013015	0.142883
OCRL	4952	2	CASSETTE	RSN_HUM:NM_001587;RSN_HUM:XM_005262422,RSN_HUM:NM_000276,RSN_HUM:XM_005262421	0.858152	0.00184105	0.715298	0.00111897	0.00184105	0.142854
MECP2	4204	1	CASSETTE	RSN_HUM:NM_001110792;RSN_HUM:NM_004992	0.299532	0.00115013	0.156982	0.00142755	0.00142755	0.14255
BLOC1S2	282991	2	CASSETTE	RSN_HUM:NM_001282439,RSN_HUM:NM_001282438,RSN_HUM:NM_173809;RSN_HUM:NM_001282436	0.98472	0.00357665	0.84237	0.00393803	0.00393803	0.14235
UBE2C	11065	1	MUT_EXCLU	RSN_HUM:NM_001281741;RSN_HUM:NM_001281742	0.0480813	0.00260071	0.190376	0.00258047	0.00260071	0.142295
TTC8	123016	8	MUT_EXCLU	RSN_HUM:NM_001288782;RSN_HUM:NM_198310	0.276884	0.00182794	0.418913	0.000431241	0.00182794	0.142029
SCOC	60592	3	CASSETTE	RSN_HUM:NM_001153690,RSN_HUM:NM_001153552;RSN_HUM:NM_032547,RSN_HUM:NM_001153446,RSN_HUM:NM_001153585,RSN_HUM:NM_001153484	0.169809	0.00355417	0.0278396	0.00692538	0.00692538	0.141969
HELQ	113510	3	CASSETTE	RSN_HUM:XM_005262712;RSN_HUM:NM_133636,RSN_HUM:XM_005262716,RSN_HUM:XM_005262711,RSN_HUM:XM_005262713,RSN_HUM:XM_005262714	0.848783	0.00121562	0.706841	0.000396553	0.00121562	0.141942
STAM	8027	1	CASSETTE	RSN_HUM:NM_003473;RSN_HUM:XM_005252603	0.972966	0.0018939	0.831166	0.00285695	0.00285695	0.1418
PPP4C	5531	5	INTERNAL3	RSN_HUM:XM_005255420;RSN_HUM:XM_005255419,RSN_HUM:XM_005255418,RSN_HUM:NM_002720	0.0389762	0.00652962	0.180742	0.00641136	0.00652962	0.141766
GABPB1	2553	1	INTERNAL5	RSN_HUM:NM_005254,RSN_HUM:XM_005254273,RSN_HUM:XM_005254274,RSN_HUM:NM_002041;RSN_HUM:NM_016654,RSN_HUM:NM_016655,RSN_HUM:NM_181427	0.508602	0.00154938	0.650168	0.00535172	0.00535172	0.141566
BRD8	10902	3	CASSETTE	RSN_HUM:NM_139199;RSN_HUM:NM_001164326,RSN_HUM:NM_006696	0.218244	0.00313199	0.359809	0.00547263	0.00547263	0.141565
KIAA1217	56243	2	CASSETTE	RSN_HUM:NM_001282767,RSN_HUM:NM_001282768,RSN_HUM:XM_005252504,RSN_HUM:XM_005252505,RSN_HUM:XM_005252507,RSN_HUM:XM_005252508,RSN_HUM:XM_005252523,RSN_HUM:XM_005252524,RSN_HUM:XM_005252513,RSN_HUM:NM_001282769,RSN_HUM:NM_001282770,RSN_HUM:XM_005252516;RSN_HUM:NM_001098500,RSN_HUM:NM_019590,RSN_HUM:XM_005252500,RSN_HUM:XM_005252501,RSN_HUM:XM_005252502,RSN_HUM:XM_005252503,RSN_HUM:XM_005252506,RSN…	0.991762	0.00654875	0.850225	0.0178284	0.0178284	0.141537
NCOA5	57727	2	INTERNAL5	RSN_HUM:NM_020967,RSN_HUM:XM_005260474;RSN_HUM:XM_005260475	0.578997	0.0017931	0.437669	0.0043702	0.0043702	0.141328
MBNL1	4154	41	CASSETTE	RSN_HUM:XM_005247467,RSN_HUM:XM_005247468;RSN_HUM:XM_005247465,RSN_HUM:XM_005247471,RSN_HUM:NM_207297	0.250201	0.00341526	0.108947	0.00144336	0.00341526	0.141254
LARP4B	23185	3	CASSETTE	RSN_HUM:NM_015155,RSN_HUM:XM_005252432;RSN_HUM:XM_005252435	0.944021	0.00238305	0.802792	0.00342785	0.00342785	0.141229
TANGO2	128989	15	CASSETTE	RSN_HUM:NM_001283179,RSN_HUM:NM_001283186,RSN_HUM:XM_005261222,RSN_HUM:XM_005261223;RSN_HUM:NM_001283235,RSN_HUM:XM_005261228,RSN_HUM:XM_005261227	0.401155	0.000977365	0.259947	0.00116264	0.00116264	0.141208
TFE3	7030	1	INTERNAL3	RSN_HUM:NM_001282142;RSN_HUM:NM_006521	0.334129	0.00616468	0.475259	0.0037306	0.00616468	0.14113
MRPL55	128308	4	CASSETTE	RSN_HUM:NM_181441;RSN_HUM:NM_181462,RSN_HUM:NM_181463	0.58423	0.00148418	0.725271	0.00112882	0.00148418	0.141041
DIABLO	56616	8	CASSETTE	RSN_HUM:NM_001278303;RSN_HUM:NM_138930	0.311157	0.000519674	0.17026	0.00329202	0.00329202	0.140897
AMN1	196394	2	LCASSETTE	RSN_HUM:NM_001113402;RSN_HUM:NM_001278412	0.957403	0.000853977	0.816541	0.00100448	0.00100448	0.140862
ZNF85	7639	2	CASSETTE	RSN_HUM:NM_001256173;RSN_HUM:NM_001256171,RSN_HUM:NM_001256172,RSN_HUM:NM_003429	0.771864	0.00188414	0.6311	0.00186864	0.00188414	0.140764
MEG3	55384	28	MUT_EXCLU	RSN_HUM:NR_033358,RSN_HUM:NR_046467,RSN_HUM:NR_046468;RSN_HUM:NR_003531	0.21788	0.00221406	0.358587	0.00268346	0.00268346	0.140707
HMGN3	9324	7	CASSETTE	RSN_HUM:NM_004242;RSN_HUM:XM_005248769	0.923189	0.00280235	0.782563	0.00415212	0.00415212	0.140626
TCOF1	6949	2	CASSETTE	RSN_HUM:NM_000356,RSN_HUM:NM_001135245,RSN_HUM:XM_005268507;RSN_HUM:NM_001008657,RSN_HUM:NM_001135243,RSN_HUM:NM_001135244,RSN_HUM:NM_001195141,RSN_HUM:XM_005268502,RSN_HUM:XM_005268503,RSN_HUM:XM_005268504,RSN_HUM:XM_005268505,RSN_HUM:XM_005268506,RSN_HUM:XM_005268508,RSN_HUM:XM_005268509	0.175884	0.00169317	0.316464	0.000899312	0.00169317	0.14058
RPS24	6229	3	LCASSETTE	RSN_HUM:NM_001026;RSN_HUM:NM_001142284	0.644299	0.0211346	0.50374	0.0178841	0.0211346	0.140559
PQLC2	54896	1	INTERNAL3	RSN_HUM:NM_001040126,RSN_HUM:NM_017765,RSN_HUM:NR_109848,RSN_HUM:NM_001040125,RSN_HUM:XM_005245916,RSN_HUM:XM_005245915;RSN_HUM:NM_001287531	0.900106	0.0010074	0.759623	0.000665067	0.0010074	0.140483
YY1AP1	55249	1	INTERNAL3	RSN_HUM:NM_001198899,RSN_HUM:NM_001198900,RSN_HUM:NM_001198901,RSN_HUM:NM_001198902,RSN_HUM:NM_001198903,RSN_HUM:NM_018253,RSN_HUM:NM_139119,RSN_HUM:NM_139121,RSN_HUM:NM_001198906;RSN_HUM:NM_001198904,RSN_HUM:NM_001198905,RSN_HUM:NM_139118	0.540593	0.00344506	0.400277	0.00183932	0.00344506	0.140316
DIABLO	56616	1	MUT_EXCLU	RSN_HUM:NM_001278302;RSN_HUM:NM_001278303	0.070625	0.00152027	0.210793	0.00542	0.00542	0.140168
TMEM222	84065	2	CASSETTE	RSN_HUM:NM_032125,RSN_HUM:NR_037576;RSN_HUM:NR_037577,RSN_HUM:NR_037580	0.968784	0.00367889	0.828652	0.00472013	0.00472013	0.140132
ABI1	10006	9	LCASSETTE	RSN_HUM:NM_001178125;RSN_HUM:NM_001012750,RSN_HUM:NM_001012751,RSN_HUM:NM_001178116,RSN_HUM:NM_001178119,RSN_HUM:NM_001178120,RSN_HUM:NM_001178122,RSN_HUM:NM_001178123,RSN_HUM:NM_005470	0.486442	0.00718421	0.346327	0.00567672	0.00718421	0.140115
GORASP1	64689	4	INTERNAL3	RSN_HUM:NM_001278789,RSN_HUM:NM_031899;RSN_HUM:NR_103867	0.886266	0.00146658	0.746254	0.00027626	0.00146658	0.140012
ILF3	3609	1	INTERNAL3	RSN_HUM:NM_001137673,RSN_HUM:NM_017620,RSN_HUM:XM_005259895;RSN_HUM:NM_004516,RSN_HUM:NM_012218,RSN_HUM:NM_153464	0.404592	0.0124174	0.544463	0.0193064	0.0193064	0.139871
DOCK7	85440	1	CASSETTE	RSN_HUM:NM_001272000,RSN_HUM:NM_001272001,RSN_HUM:NM_033407;RSN_HUM:NM_001271999	0.942292	0.00244595	0.802421	0.00165225	0.00244595	0.139871
MEG3	55384	20	MUT_EXCLU	RSN_HUM:NR_003530;RSN_HUM:NR_046470	0.164469	0.00205082	0.304318	0.00255406	0.00255406	0.139849
TPGS2	25941	16	CASSETTE	RSN_HUM:XM_005258242,RSN_HUM:NM_001271950;RSN_HUM:NM_001271949	0.278508	0.00982325	0.13868	0.00774374	0.00982325	0.139828
CAST	831	2	CASSETTE	RSN_HUM:NM_001042440,RSN_HUM:NM_173060,RSN_HUM:NM_001284213,RSN_HUM:NM_001284212;RSN_HUM:NM_001190442	0.584721	0.00791459	0.444956	0.00339636	0.00791459	0.139765
RASA2	5922	1	INTERNAL5	RSN_HUM:XM_005247688;RSN_HUM:NM_006506	0.395234	0.0007302	0.255543	0.0014432	0.0014432	0.139691
C2orf43	60526	7	CASSETTE	RSN_HUM:NM_001282722;RSN_HUM:NM_001282720	0.743943	0.00139917	0.883616	0.000440123	0.00139917	0.139673
TACC1	6867	3	LCASSETTE	RSN_HUM:NM_001122824;RSN_HUM:NM_006283	0.207721	0.00249229	0.068084	0.00246607	0.00249229	0.139637
CDC42BPB	9578	2	CASSETTE	RSN_HUM:XM_005268228,RSN_HUM:XM_005268229;RSN_HUM:NM_006035,RSN_HUM:XM_005268227,RSN_HUM:XM_005268230	0.425946	0.00422988	0.286359	0.00535009	0.00535009	0.139587
RNH1	6050	7	INTERNAL3	RSN_HUM:NM_203384;RSN_HUM:NM_203385	0.731615	0.0017229	0.592187	0.0023756	0.0023756	0.139428
ALG13	79868	10	INTERNAL3	RSN_HUM:NM_001099922,RSN_HUM:NM_001168385,RSN_HUM:NM_018466;RSN_HUM:NM_001257230,RSN_HUM:NR_033125	0.827114	0.00124089	0.687799	0.000614133	0.00124089	0.139315
KANSL3	55683	1	INTERNAL3	RSN_HUM:NM_001115016,RSN_HUM:NR_047657,RSN_HUM:XM_005263984,RSN_HUM:XM_005263987,RSN_HUM:XM_005263980,RSN_HUM:XM_005263981,RSN_HUM:XM_005263985,RSN_HUM:XM_005263982,RSN_HUM:XM_005263983,RSN_HUM:XM_005263986;RSN_HUM:NR_047653,RSN_HUM:NR_047654,RSN_HUM:XM_005263988	0.748294	0.00130032	0.609013	0.00112541	0.00130032	0.139281
CHURC1	91612	3	CASSETTE	RSN_HUM:NM_001204064;RSN_HUM:NM_145165	0.198336	0.00217005	0.0590809	0.00330902	0.00330902	0.139255
SRGAP1	57522	1	MUT_EXCLU	RSN_HUM:XM_005269042;RSN_HUM:NM_020762	0.473109	0.00166818	0.612358	0.00113555	0.00166818	0.139249
THOC2	57187	2	CASSETTE	RSN_HUM:NM_001081550,RSN_HUM:XM_005262450;RSN_HUM:XM_005262447	0.967596	0.0088477	0.828391	0.00287485	0.0088477	0.139205
MFF	56947	6	LCASSETTE	RSN_HUM:NM_001277066;RSN_HUM:NM_001277061	0.559345	0.00236169	0.420194	0.00137722	0.00236169	0.139151
HSD3B7	80270	4	INTERNAL3	RSN_HUM:NM_001142777;RSN_HUM:NM_001142778,RSN_HUM:NM_025193	0.161874	0.00187615	0.300992	0.0013203	0.00187615	0.139118
SYNJ2BP-COX16	100529257	1	MUT_EXCLU	RSN_HUM:NM_001202547;RSN_HUM:NM_001202548	0.195997	0.00362728	0.0569989	0.0019982	0.00362728	0.138998
CCNT1	904	1	CASSETTE	RSN_HUM:NM_001277842;RSN_HUM:NM_001240	0.236774	0.0008865	0.0978433	0.00219126	0.00219126	0.138931
RPS24	6229	2	XCASSETTE	RSN_HUM:NM_001026;RSN_HUM:NM_001142283	0.644097	0.0211412	0.505261	0.0178302	0.0211412	0.138836
PXK	54899	12	CASSETTE	RSN_HUM:NM_001289101;RSN_HUM:NM_001289096,RSN_HUM:NM_001289100	0.080387	0.00315225	0.219127	0.00114819	0.00315225	0.13874
RTN3	10313	4	CASSETTE	RSN_HUM:NM_201429;RSN_HUM:NM_001265589	0.418088	0.000412114	0.556716	0.002576	0.002576	0.138628
MAPKAP1	79109	4	CASSETTE	RSN_HUM:NM_024117;RSN_HUM:NM_001006617,RSN_HUM:NM_001006620,RSN_HUM:NM_001006621	0.431276	0.00812334	0.292703	0.00918542	0.00918542	0.138573
KIF2A	3796	2	CASSETTE	RSN_HUM:NM_001243952,RSN_HUM:NM_001243953,RSN_HUM:NM_004520;RSN_HUM:NM_001098511	0.993579	0.00215695	0.855374	0.0017044	0.00215695	0.138205
ATG12	9140	4	XCASSETTE	RSN_HUM:NM_001277783;RSN_HUM:NR_073603	0.0706042	0.00125347	0.208795	0.00221988	0.00221988	0.138191
BIRC6	57448	4	CASSETTE	RSN_HUM:XM_005264454;RSN_HUM:XM_005264449,RSN_HUM:XM_005264450,RSN_HUM:XM_005264451,RSN_HUM:XM_005264452,RSN_HUM:XM_005264453,RSN_HUM:XM_005264455,RSN_HUM:NM_016252	0.0574729	0.00118317	0.195637	0.000877134	0.00118317	0.138164
SNHG21	100505616	2	CASSETTE	RSN_HUM:NR_110098;RSN_HUM:NR_110096	0.27881	0.000323876	0.416874	0.0010845	0.0010845	0.138064
EIF4E2	9470	4	CASSETTE	RSN_HUM:NM_001276336,RSN_HUM:NM_001276337;RSN_HUM:NM_001282958	0.97678	0.0322481	0.839055	0.00672557	0.0322481	0.137725
PTCD2	79810	9	CASSETTE	RSN_HUM:NM_001284405;RSN_HUM:NM_024754,RSN_HUM:XM_005248601,RSN_HUM:XM_005248603	0.756732	0.00285081	0.619014	0.00174665	0.00285081	0.137718
LSM14B	149986	3	LCASSETTE	RSN_HUM:XM_005260303;RSN_HUM:XM_005260302	0.286534	0.00391507	0.148892	0.00187451	0.00391507	0.137642
ARNTL2	56938	1	CASSETTE	RSN_HUM:NM_001248004,RSN_HUM:NM_001248003,RSN_HUM:NM_001248005;RSN_HUM:NM_001248002	0.80679	0.00146895	0.669149	0.00092655	0.00146895	0.137641
MYO5A	4644	1	CASSETTE	RSN_HUM:NM_001142495,RSN_HUM:XM_005254400,RSN_HUM:XM_005254402;RSN_HUM:NM_000259,RSN_HUM:XM_005254397,RSN_HUM:XM_005254398,RSN_HUM:XM_005254399,RSN_HUM:XM_005254401,RSN_HUM:XM_005254403	0.516752	0.00163463	0.37932	0.00135347	0.00163463	0.137432
BCL2L13	23786	21	CASSETTE	RSN_HUM:NM_001270728;RSN_HUM:NM_001270732	0.413925	0.00136571	0.551121	0.00234903	0.00234903	0.137196
SPOPL	339745	1	CASSETTE	RSN_HUM:NM_001001664,RSN_HUM:XM_005263657;RSN_HUM:XM_005263655,RSN_HUM:XM_005263656	0.827129	0.000799875	0.690138	0.00231627	0.00231627	0.136991
HNRNPD	3184	2	CASSETTE	RSN_HUM:NM_001003810,RSN_HUM:NM_002138;RSN_HUM:NM_031369,RSN_HUM:NM_031370	0.602912	0.0193496	0.466083	0.00409112	0.0193496	0.136829
TMPO	7112	7	CASSETTE	RSN_HUM:NM_001032284;RSN_HUM:XM_005269132	0.218061	0.00356368	0.0813916	0.000665916	0.00356368	0.136669
MIB2	142678	3	CASSETTE	RSN_HUM:NM_001170688,RSN_HUM:NM_001170689;RSN_HUM:NM_001170686,RSN_HUM:NM_001170687,RSN_HUM:NM_080875,RSN_HUM:NR_033183	0.0335579	0.00158234	0.170035	0.00192313	0.00192313	0.136477
PLEKHA5	54477	18	LCASSETTE	RSN_HUM:NM_019012,RSN_HUM:XM_005253400;RSN_HUM:XM_005253398	1	0.0010183	0.863532	0.000327724	0.0010183	0.136468
RTN3	10313	11	CASSETTE	RSN_HUM:NM_001265591,RSN_HUM:NM_006054,RSN_HUM:NM_201430,RSN_HUM:NR_049750,RSN_HUM:NR_049751;RSN_HUM:NM_201429	0.988346	0.0097992	0.851908	0.00868836	0.0097992	0.136438
PARD3	56288	1	CASSETTE	RSN_HUM:NM_001184786,RSN_HUM:NM_001184788,RSN_HUM:NM_001184789,RSN_HUM:NM_001184790,RSN_HUM:NM_001184791,RSN_HUM:XM_005252535,RSN_HUM:NM_001184794;RSN_HUM:NM_001184785,RSN_HUM:NM_001184787,RSN_HUM:NM_019619,RSN_HUM:XM_005252528,RSN_HUM:XM_005252530,RSN_HUM:XM_005252531,RSN_HUM:XM_005252532,RSN_HUM:XM_005252534,RSN_HUM:NM_001184792,RSN_HUM:NM_001184793,RSN_HUM:XM_005252536	0.423914	0.00196455	0.287552	0.0010805	0.00196455	0.136362
NUDT4	11163	1	INTERNAL3	RSN_HUM:NM_019094;RSN_HUM:NM_199040	0.592695	0.0054908	0.729045	0.00860243	0.00860243	0.13635
PXDN	7837	1	CASSETTE	RSN_HUM:XM_005264707;RSN_HUM:NM_012293	0.548076	0.0299765	0.411756	0.027763	0.0299765	0.13632
BLVRA	644	1	CASSETTE	RSN_HUM:NM_000712;RSN_HUM:NM_001253823	0.893449	0.002076	0.757342	0.00061465	0.002076	0.136107
SNX7	51375	2	CASSETTE	RSN_HUM:NM_015976,RSN_HUM:NM_152238;RSN_HUM:NR_033716	0.904913	0.0042172	0.768894	0.00218255	0.0042172	0.136019
USP25	29761	2	LCASSETTE	RSN_HUM:NM_013396;RSN_HUM:NM_001283041,RSN_HUM:XM_005260949	0.983648	0.00351173	0.847752	0.00138649	0.00351173	0.135896
PLEKHB2	55041	21	MUT_M_EXCLU	RSN_HUM:NM_001267066;RSN_HUM:NM_001267067	0.567143	0.00527661	0.702991	0.0100678	0.0100678	0.135848
PPP1R12A	4659	17	MUT_EXCLU	RSN_HUM:NM_001244992,RSN_HUM:XM_005268891;RSN_HUM:XM_005268892	0.709195	0.00892683	0.57337	0.00224938	0.00892683	0.135825
MSRB3	253827	1	CASSETTE	RSN_HUM:NM_001031679;RSN_HUM:NM_001193460	0.928124	0.00160851	0.792355	0.00115378	0.00160851	0.135769
SMPD4	55627	2	CASSETTE	RSN_HUM:NM_001171083,RSN_HUM:NM_017751,RSN_HUM:NR_033232,RSN_HUM:XM_005263704;RSN_HUM:NM_017951,RSN_HUM:NR_033230,RSN_HUM:NR_033231	0.266116	0.00342708	0.130392	0.00499765	0.00499765	0.135724
ADD3	120	6	CASSETTE	RSN_HUM:XM_005269530,RSN_HUM:XM_005269529,RSN_HUM:NM_019903,RSN_HUM:NM_001121,RSN_HUM:NM_016824,RSN_HUM:XM_005269533,RSN_HUM:XM_005269531,RSN_HUM:XM_005269534;RSN_HUM:XM_005269535	0.990089	0.00879871	0.854396	0.00217268	0.00879871	0.135693
PTCD2	79810	4	CASSETTE	RSN_HUM:XM_005248601;RSN_HUM:NM_001284403,RSN_HUM:NM_001284404,RSN_HUM:NM_001284405,RSN_HUM:NM_024754,RSN_HUM:XM_005248603	0.728718	0.00285007	0.593345	0.00178867	0.00285007	0.135373
LYPLA1	10434	3	INTERNAL5	RSN_HUM:NM_001279356,RSN_HUM:NM_001279358,RSN_HUM:NM_001279360,RSN_HUM:NM_006330;RSN_HUM:NM_001279359,RSN_HUM:XM_005251127	0.923056	0.00226138	0.787841	0.00105275	0.00226138	0.135215
MPDZ	8777	4	CASSETTE	RSN_HUM:NM_001261407,RSN_HUM:NM_003829;RSN_HUM:XM_005251622,RSN_HUM:XM_005251623,RSN_HUM:NM_001261406	0.110681	0.0014998	0.245827	6.59e-05	0.0014998	0.135146
STOML1	9399	2	CASSETTE	RSN_HUM:NM_001256673,RSN_HUM:NM_001256674;RSN_HUM:NM_001256672,RSN_HUM:NM_001256675,RSN_HUM:NM_001256676,RSN_HUM:NM_001256677,RSN_HUM:NM_004809,RSN_HUM:XM_005254792,RSN_HUM:XM_005254793	0.247894	0.00101939	0.112856	0.00153204	0.00153204	0.135038
THG1L	54974	1	INTERNAL3	RSN_HUM:NM_017872;RSN_HUM:XM_005265939	0.972255	0.0015931	0.837527	0.0002782	0.0015931	0.134728
PI4KB	5298	22	CASSETTE	RSN_HUM:XM_005245263;RSN_HUM:XM_005245264	0.664904	0.00286402	0.530477	0.000908428	0.00286402	0.134427
TFAM	7019	1	CASSETTE	RSN_HUM:NM_001270782;RSN_HUM:NM_003201,RSN_HUM:NR_073073	0.13441	0.00210253	0	0.0020853	0.00210253	0.13441
NCOA4	8031	2	CASSETTE	RSN_HUM:NM_001145263;RSN_HUM:NM_001145260,RSN_HUM:NM_001145261	0.98243	0.00754977	0.848286	0.00801178	0.00801178	0.134144
ZNF706	51123	3	CASSETTE	RSN_HUM:NM_016096;RSN_HUM:NM_001042510	0.968279	0.00695275	0.834258	0.00589424	0.00695275	0.134021
RPS24	6229	6	CASSETTE	RSN_HUM:NM_001142282;RSN_HUM:NM_001142283	0.550168	0.000435867	0.416221	0.00100692	0.00100692	0.133947
CCDC88A	55704	2	CASSETTE	RSN_HUM:NM_018084,RSN_HUM:XM_005264423;RSN_HUM:NM_001135597,RSN_HUM:NM_001254943,RSN_HUM:XM_005264421,RSN_HUM:XM_005264418	0.454229	0.00205381	0.320361	0.000610562	0.00205381	0.133868
DIS3	22894	1	MUT_EXCLU	RSN_HUM:NM_001128226;RSN_HUM:NM_014953	0.27073	0.0018892	0.137252	0.00201683	0.00201683	0.133478
RPP14	11102	11	CASSETTE	RSN_HUM:NR_049755;RSN_HUM:NM_001098783	0.194364	0.00071155	0.327787	0.00245068	0.00245068	0.133423
ARMC8	25852	7	LCASSETTE	RSN_HUM:NM_001282342;RSN_HUM:NM_014154,RSN_HUM:NM_015396	0.202026	0.00118797	0.0686181	0.00162639	0.00162639	0.133408
PVR	5817	2	INTERNAL5	RSN_HUM:NM_001135768;RSN_HUM:NM_006505	0.299719	0.0034459	0.433122	0.0024642	0.0034459	0.133403
SLC4A7	9497	5	INTERNAL5	RSN_HUM:NM_001258379,RSN_HUM:NM_001258380,RSN_HUM:XM_005265598,RSN_HUM:XM_005265601;RSN_HUM:XM_005265599,RSN_HUM:XM_005265600	0.934269	0.0012536	0.800893	0.0007393	0.0012536	0.133376
FBXO25	26260	1	CASSETTE	RSN_HUM:NM_012173,RSN_HUM:XM_005266033;RSN_HUM:NM_183420,RSN_HUM:NM_183421,RSN_HUM:XM_005266029,RSN_HUM:XM_005266030,RSN_HUM:XM_005266031	0.235407	0.00231982	0.102054	0.0019862	0.00231982	0.133353
ARHGEF11	9826	1	CASSETTE	RSN_HUM:NM_014784;RSN_HUM:NM_198236,RSN_HUM:XM_005245629	0.568309	0.00124545	0.701611	0.00056185	0.00124545	0.133302
CREM	1390	75	XCASSETTE	RSN_HUM:NR_051975;RSN_HUM:NM_181571,RSN_HUM:NM_183011	0.29828	0.000494502	0.165014	0.00137201	0.00137201	0.133266
RGL1	23179	1	CASSETTE	RSN_HUM:XM_005245011;RSN_HUM:NM_015149	0.39014	0.000838759	0.523386	0.00164525	0.00164525	0.133246
ALG8	79053	1	CASSETTE	RSN_HUM:NM_024079;RSN_HUM:NM_001007027	0.881329	0.00224233	0.748131	0.00111705	0.00224233	0.133198
ATG12	9140	2	LCASSETTE	RSN_HUM:NM_001277783;RSN_HUM:NR_033362	0.0564948	0.00156652	0.189666	0.00244377	0.00244377	0.133171
MRPL42	28977	4	CASSETTE	RSN_HUM:NM_014050;RSN_HUM:NR_038161	0.984518	0.00302828	0.85147	0.00178673	0.00302828	0.133048
GNPDA2	132789	9	LCASSETTE	RSN_HUM:NR_073095;RSN_HUM:NM_001270880	0.0616138	0.00137469	0.194646	0.000557423	0.00137469	0.133032
GPR107	57720	4	CASSETTE	RSN_HUM:NM_001287346,RSN_HUM:NM_020960;RSN_HUM:NM_001136558	0.833294	0.00377562	0.700507	0.00422715	0.00422715	0.132787
HCFC1R1	54985	3	INTERNAL3	RSN_HUM:NM_001002017;RSN_HUM:NM_001288667	0.74028	0.0009156	0.607495	0.001094	0.001094	0.132785
RHCE	6006	6	CASSETTE	RSN_HUM:NM_138618;RSN_HUM:NM_020485	0	4.92712e-05	0.132755	0.00150201	0.00150201	0.132755
RBM14-RBM4	100526737	1	CASSETTE	RSN_HUM:NM_001198846;RSN_HUM:NM_001198845	0.0209667	0.00326708	0.153598	0.000595061	0.00326708	0.132631
FKRP	79147	1	INTERNAL5	RSN_HUM:NM_001039885;RSN_HUM:NM_024301	0.236308	0.000699193	0.103714	0.00149257	0.00149257	0.132594
FKRP	79147	8	INTERNAL5	RSN_HUM:XM_005259248,RSN_HUM:XM_005259249;RSN_HUM:XM_005259247	0.763692	0.000699193	0.896286	0.00149257	0.00149257	0.132594
NMT2	9397	3	CASSETTE	RSN_HUM:XM_005252642,RSN_HUM:NM_004808;RSN_HUM:XM_005252643	0.831937	0.00388218	0.699387	0.00284502	0.00388218	0.13255
PICALM	8301	4	CASSETTE	RSN_HUM:NM_001008660,RSN_HUM:NM_001206947;RSN_HUM:NM_007166	0.83031	0.00985034	0.697821	0.0134659	0.0134659	0.132489
ATP11C	286410	1	CASSETTE	RSN_HUM:NM_001010986;RSN_HUM:NM_173694,RSN_HUM:XM_005262405	0.608242	0.001456	0.475767	0.0005509	0.001456	0.132475
TIAL1	7073	1	INTERNAL3	RSN_HUM:NM_001033925;RSN_HUM:NM_003252	0.298686	0.00516697	0.166258	0.00294261	0.00516697	0.132428
RPP14	11102	2	CASSETTE	RSN_HUM:NM_007042,RSN_HUM:NR_049757,RSN_HUM:NM_001098783,RSN_HUM:NR_049755;RSN_HUM:NR_049756	0.981566	0.00132908	0.849145	0.00243545	0.00243545	0.132421
PRDM5	11107	2	CASSETTE	RSN_HUM:XM_005262706,RSN_HUM:XM_005262707;RSN_HUM:NM_018699,RSN_HUM:XM_005262708	0.931436	0.00476756	0.799163	0.0005019	0.00476756	0.132273
C6orf52	347744	4	CASSETTE	RSN_HUM:NR_026737;RSN_HUM:NM_001145020	0.780114	1.74333e-05	0.91225	0.00146363	0.00146363	0.132136
LRRC75A-AS1	125144	2	CASSETTE	RSN_HUM:NR_027172,RSN_HUM:NR_027158,RSN_HUM:NR_027166,RSN_HUM:NR_027173,RSN_HUM:NR_027174,RSN_HUM:NR_027175,RSN_HUM:NR_027176,RSN_HUM:NR_027177,RSN_HUM:NR_027178,RSN_HUM:NR_027179,RSN_HUM:NR_045023;RSN_HUM:NR_027168,RSN_HUM:NR_027164,RSN_HUM:NR_027167	0.744571	0.0314475	0.612527	0.046364	0.046364	0.132044
LRRC75A-AS1	125144	80	CASSETTE	RSN_HUM:NR_027159,RSN_HUM:NR_027171,RSN_HUM:NR_045024,RSN_HUM:NR_045027;RSN_HUM:NR_027160	0.744571	0.0314475	0.612527	0.046364	0.046364	0.132044
LRRC75A-AS1	125144	5	INTERNAL3	RSN_HUM:NR_027168,RSN_HUM:NR_027164,RSN_HUM:NR_027167;RSN_HUM:NR_027163,RSN_HUM:NR_027169,RSN_HUM:NR_045026	0.3689	0.0181657	0.500917	0.0358375	0.0358375	0.132017
LRRC75A-AS1	125144	83	INTERNAL3	RSN_HUM:NR_027160;RSN_HUM:NR_027161,RSN_HUM:NR_027162	0.3689	0.0181657	0.500917	0.0358375	0.0358375	0.132017
ATE1	11101	2	MUT_EXCLU	RSN_HUM:NM_001001976,RSN_HUM:NM_001288734,RSN_HUM:XM_005269461;RSN_HUM:NM_001288735,RSN_HUM:NM_001288736,RSN_HUM:NM_007041,RSN_HUM:XM_005269460	0.228799	0.00113088	0.360535	0.000559053	0.00113088	0.131736
RPAIN	84268	16	CASSETTE	RSN_HUM:NM_001160246;RSN_HUM:NM_001160266	0.526566	0.00103273	0.394956	0.0014156	0.0014156	0.13161
SLMAP	7871	6	LCASSETTE	RSN_HUM:XM_005265465,RSN_HUM:XM_005265466,RSN_HUM:NM_007159;RSN_HUM:XM_005265456,RSN_HUM:XM_005265457,RSN_HUM:XM_005265458,RSN_HUM:XM_005265468,RSN_HUM:XM_005265469	0.724128	0.00229807	0.592682	0.000942326	0.00229807	0.131446
HSD17B10	3028	1	INTERNAL5	RSN_HUM:NM_001037811;RSN_HUM:NM_004493	0.0350036	0.005548	0.166415	0.0011267	0.005548	0.131411
SLC9A1	6548	1	CASSETTE	RSN_HUM:NR_046474;RSN_HUM:NM_003047	0.0399857	0.00181815	0.171362	0.00144373	0.00181815	0.131376
2002-09-01	4735	16	MUT_M_EXCLU	RSN_HUM:NM_001008492;RSN_HUM:NM_001282973	0.837915	0.000488031	0.706563	0.00103873	0.00103873	0.131352
MYO6	4646	5	LCASSETTE	RSN_HUM:XM_005248725,RSN_HUM:XM_005248726;RSN_HUM:XM_005248721	1	0.00134053	0.868683	0.000355826	0.00134053	0.131317
CDC25C	995	3	LCASSETTE	RSN_HUM:NM_022809;RSN_HUM:NM_001287582,RSN_HUM:NM_001287583,RSN_HUM:NM_001790	0.741059	0.0041353	0.609838	0.00050702	0.0041353	0.131221
PDE4DIP	9659	2	CASSETTE	RSN_HUM:NM_001198832;RSN_HUM:NM_001198834,RSN_HUM:NM_014644	0.99172	0.00238827	0.860616	0.0024192	0.0024192	0.131104
MDM2	4193	1	LCASSETTE	RSN_HUM:NM_001145339;RSN_HUM:NM_002392,RSN_HUM:XM_005268872,RSN_HUM:NM_001145337	0.338225	0.00583723	0.2072	0.0345078	0.0345078	0.131025
N6AMT1	29104	1	CASSETTE	RSN_HUM:NM_182749;RSN_HUM:NR_047510,RSN_HUM:NM_013240	0.222642	0.00111075	0.0918188	0.0005696	0.00111075	0.130823
MSTO1	55154	11	CASSETTE	RSN_HUM:NR_046295;RSN_HUM:NR_046293	0.339493	0.00122414	0.208778	0.00182038	0.00182038	0.130715
DROSHA	29102	8	LCASSETTE	RSN_HUM:XM_005248294;RSN_HUM:NM_013235,RSN_HUM:XM_005248291,RSN_HUM:XM_005248292	0.214392	0.00154623	0.0837048	0.00034765	0.00154623	0.130687
GYG2	8908	3	LCASSETTE	RSN_HUM:NM_001184703,RSN_HUM:NM_001184704;RSN_HUM:NM_001079855,RSN_HUM:NM_003918	0.951127	0.00136812	0.820649	0.000155609	0.00136812	0.130478
SDCCAG3	10807	5	CASSETTE	RSN_HUM:NM_001039708;RSN_HUM:NM_006643	0.686012	0.00128146	0.816297	0.00244862	0.00244862	0.130285
BBIP1	92482	6	CASSETTE	RSN_HUM:NM_001243783;RSN_HUM:NM_001195305	0.191804	0.00196294	0.0615281	0.00129209	0.00196294	0.130276
TCEB1	6921	2	CASSETTE	RSN_HUM:NM_001204857;RSN_HUM:NM_001204860	0.501872	0.00208758	0.371632	0.00719124	0.00719124	0.13024
NLRP1	22861	3	INTERNAL5	RSN_HUM:NM_001033053;RSN_HUM:NM_014922,RSN_HUM:NM_033004,RSN_HUM:NM_033006,RSN_HUM:NM_033007	0.0847768	0.0013105	0.214966	0.00048845	0.0013105	0.130189
LRRFIP1	9208	26	CASSETTE	RSN_HUM:XM_005246126,RSN_HUM:XM_005246129,RSN_HUM:XM_005246131;RSN_HUM:XM_005246128,RSN_HUM:XM_005246122,RSN_HUM:XM_005246125	0.944332	0.000587149	0.814453	0.00139346	0.00139346	0.129879
KIF13A	63971	12	MUT_EXCLU	RSN_HUM:NM_022113,RSN_HUM:XM_005249289,RSN_HUM:XM_005249291;RSN_HUM:XM_005249292	1	0.000249076	0.870206	0.00194401	0.00194401	0.129794
MEG3	55384	4	MUT_EXCLU	RSN_HUM:NR_002766,RSN_HUM:NR_046473;RSN_HUM:NR_033360	0.763493	0.00228135	0.633797	0.00398977	0.00398977	0.129696
PHPT1	29085	5	INTERNAL3	RSN_HUM:NM_001135861;RSN_HUM:NM_001287343	0.807287	0.0005599	0.677653	0.0029735	0.0029735	0.129634
ZMYND8	23613	39	CASSETTE	RSN_HUM:XM_005260361,RSN_HUM:XM_005260365,RSN_HUM:XM_005260366,RSN_HUM:XM_005260369,RSN_HUM:XM_005260371,RSN_HUM:XM_005260377;RSN_HUM:XM_005260356,RSN_HUM:XM_005260358,RSN_HUM:XM_005260360,RSN_HUM:XM_005260362,RSN_HUM:XM_005260364	0.372469	0.0011013	0.242881	0.00021245	0.0011013	0.129588
ZMYND8	23613	3	CASSETTE	RSN_HUM:NM_001281771,RSN_HUM:NM_001281772,RSN_HUM:NM_001281778,RSN_HUM:NM_001281780,RSN_HUM:NM_001281781,RSN_HUM:NM_001281783,RSN_HUM:NM_001281784,RSN_HUM:NM_012408,RSN_HUM:NM_183048;RSN_HUM:NM_001281773,RSN_HUM:NM_001281774,RSN_HUM:NM_001281775,RSN_HUM:NM_001281776,RSN_HUM:NM_001281777,RSN_HUM:NM_001281779,RSN_HUM:NM_001281782,RSN_HUM:NM_183047	0.372469	0.0011013	0.242881	0.00021245	0.0011013	0.129588
TMEM116	89894	1	CASSETTE	RSN_HUM:NM_001193453;RSN_HUM:NM_001193531,RSN_HUM:NM_138341,RSN_HUM:XM_005253985,RSN_HUM:XM_005253986	0.188114	0.00037371	0.0585304	0.00104134	0.00104134	0.129584
AURKA	6790	8	CASSETTE	RSN_HUM:NM_198434,RSN_HUM:NM_198436,RSN_HUM:XM_005260534;RSN_HUM:NM_198433	0.519334	0.0019215	0.389956	0.000392267	0.0019215	0.129378
NAA25	80018	1	CASSETTE	RSN_HUM:XM_005253938;RSN_HUM:NM_024953	0.0714332	0.00101213	0.2008	0.00023755	0.00101213	0.129367
C2orf43	60526	10	CASSETTE	RSN_HUM:NM_001282721,RSN_HUM:NR_104233;RSN_HUM:NM_001282723,RSN_HUM:NM_021925	0.673252	0.00164173	0.802525	0.000522725	0.00164173	0.129273
CD97	976	1	CASSETTE	RSN_HUM:XM_005260171,RSN_HUM:NM_001025160;RSN_HUM:XM_005260170,RSN_HUM:NM_078481	0.754475	0.00246714	0.625295	0.00139742	0.00246714	0.12918
MBNL1	4154	40	MUT_M_EXCLU	RSN_HUM:XM_005247464,RSN_HUM:XM_005247466,RSN_HUM:XM_005247471;RSN_HUM:XM_005247472	0.99584	0.00584851	0.866687	0.00180294	0.00584851	0.129153
RFC1	5981	1	INTERNAL3	RSN_HUM:NM_001204747;RSN_HUM:NM_002913	0.328015	0.0025008	0.198864	0.000352	0.0025008	0.129151
THUMPD2	80745	4	CASSETTE	RSN_HUM:NM_025264,RSN_HUM:NR_028102,RSN_HUM:XM_005264577;RSN_HUM:XM_005264579	0.963199	0.00136882	0.834115	0.000474275	0.00136882	0.129084
CCDC90B	60492	3	CASSETTE	RSN_HUM:NM_001286118,RSN_HUM:NM_001286119;RSN_HUM:NM_001286116,RSN_HUM:NM_001286117,RSN_HUM:NM_021825	0.384716	0.00814184	0.25574	0.0106594	0.0106594	0.128976
RTCA	8634	1	CASSETTE	RSN_HUM:NM_003729;RSN_HUM:NM_001130841	0.985636	0.0035993	0.856775	0.0008923	0.0035993	0.128861
MFF	56947	31	LCASSETTE	RSN_HUM:NM_001277065,RSN_HUM:NM_001277066,RSN_HUM:NR_102266,RSN_HUM:XM_005246688;RSN_HUM:XM_005246685	0.605872	0.00394093	0.477293	0.0019026	0.00394093	0.128579
MAP2K5	5607	1	CASSETTE	RSN_HUM:NM_002757;RSN_HUM:NM_145160,RSN_HUM:NM_001206804	0.22073	0.001534	0.0921537	0.0004894	0.001534	0.128576
DLG1	1739	6	MUT_EXCLU	RSN_HUM:NM_001098424,RSN_HUM:NM_001204387,RSN_HUM:NM_001204388,RSN_HUM:NM_001290983,RSN_HUM:XM_005269298,RSN_HUM:XM_005269299,RSN_HUM:XM_005269301;RSN_HUM:NM_004087,RSN_HUM:XM_005269289,RSN_HUM:XM_005269290,RSN_HUM:XM_005269291,RSN_HUM:XM_005269292,RSN_HUM:XM_005269297	0.111916	0.00308644	0.240463	0.000522277	0.00308644	0.128547
STEAP3	55240	2	CASSETTE	RSN_HUM:NM_001008410;RSN_HUM:NM_182915	0.580409	0.00214831	0.708918	0.00173546	0.00214831	0.128509
RPS6KC1	26750	3	CASSETTE	RSN_HUM:NM_001287218,RSN_HUM:NM_001287219;RSN_HUM:NM_001136138,RSN_HUM:NM_001287221,RSN_HUM:NM_012424	0.5158	0.00195521	0.6443	0.000487817	0.00195521	0.1285
NRD1	4898	2	LCASSETTE	RSN_HUM:NM_001101662;RSN_HUM:NM_001242361,RSN_HUM:NM_002525	0.962442	0.0145275	0.834015	0.00804338	0.0145275	0.128427
CCDC14	64770	7	INTERNAL5	RSN_HUM:XM_005247715,RSN_HUM:NM_022757,RSN_HUM:XM_005247710,RSN_HUM:XM_005247713,RSN_HUM:XM_005247714,RSN_HUM:XM_005247712,RSN_HUM:XM_005247716;RSN_HUM:XM_005247711	0.892265	0.00179607	0.763844	0.000951488	0.00179607	0.128421
SLC16A7	9194	6	LCASSETTE	RSN_HUM:NM_001270623,RSN_HUM:XM_005269231,RSN_HUM:NM_004731;RSN_HUM:NR_073055	0.990703	0.00138146	0.862366	0.000270651	0.00138146	0.128337
DOCK11	139818	1	CASSETTE	RSN_HUM:NM_144658;RSN_HUM:XM_005262368,RSN_HUM:XM_005262369	0.674021	0.001124	0.545821	0.000347	0.001124	0.1282
BRAT1	221927	5	CASSETTE	RSN_HUM:XM_005249644;RSN_HUM:XM_005249642	0.100632	0.000989746	0.228796	0.00128237	0.00128237	0.128164
PGF	5228	1	CASSETTE	RSN_HUM:NM_001207012;RSN_HUM:NM_002632	0.652072	0.000941	0.523908	0.0015037	0.0015037	0.128164
LDB2	9079	13	MUT_M_EXCLU	RSN_HUM:XM_005248197,RSN_HUM:XM_005248201;RSN_HUM:XM_005248202,RSN_HUM:XM_005248198	0.430701	0.00123547	0.30256	0.00022489	0.00123547	0.128141
CDC27	996	2	INTERNAL3	RSN_HUM:NM_001114091,RSN_HUM:NM_001256,RSN_HUM:XM_005257895;RSN_HUM:XM_005257892	0.499194	0.004838	0.627323	0.0031907	0.004838	0.128129
ZFAND1	79752	5	CASSETTE	RSN_HUM:NM_024699,RSN_HUM:NR_033194,RSN_HUM:NR_033195;RSN_HUM:NR_033193	0.979123	0.00161659	0.851085	0.00138569	0.00161659	0.128038
RNF146	81847	9	CASSETTE	RSN_HUM:NR_045102,RSN_HUM:NR_045103;RSN_HUM:NM_001242844,RSN_HUM:NM_030963,RSN_HUM:NM_001242845	0.704126	0.0012627	0.576101	0.00334612	0.00334612	0.128025
ATG12	9140	3	LCASSETTE	RSN_HUM:NM_001277783;RSN_HUM:NR_033363	0.054903	0.00161193	0.182901	0.00253415	0.00253415	0.127998
CHTOP	26097	2	INTERNAL3	RSN_HUM:NM_001206612;RSN_HUM:NM_015607	0.57214	0.005018	0.700111	0.00547985	0.00547985	0.127971
RPS24	6229	1	LCASSETTE	RSN_HUM:NM_001026;RSN_HUM:NM_001142282	0.621293	0.0219172	0.493415	0.0182583	0.0219172	0.127878
PTCD2	79810	5	LCASSETTE	RSN_HUM:NM_001284403;RSN_HUM:XM_005248603	0.788974	0.00262733	0.661129	0.00159016	0.00262733	0.127845
MTMR3	8897	3	CASSETTE	RSN_HUM:NM_021090,RSN_HUM:NM_153050,RSN_HUM:NM_153051,RSN_HUM:XM_005261806;RSN_HUM:XM_005261804,RSN_HUM:XM_005261803,RSN_HUM:XM_005261805,RSN_HUM:XM_005261807,RSN_HUM:XM_005261808	0.959738	0.0010705	0.831963	0.00197701	0.00197701	0.127775
BCL2L11	10018	36	CASSETTE	RSN_HUM:NM_001204108,RSN_HUM:NM_138621,RSN_HUM:NM_138622,RSN_HUM:XM_005263551;RSN_HUM:NM_138624	1	6.32668e-06	0.872228	0.00120057	0.00120057	0.127772
SZRD1	26099	4	CASSETTE	RSN_HUM:NR_073502;RSN_HUM:NM_001114600	0.721107	0.00535662	0.59352	0.00530176	0.00535662	0.127587
TTK	7272	1	INTERNAL3	RSN_HUM:NM_001166691;RSN_HUM:NM_003318	0.160231	0.0012301	0.032689	0.0006363	0.0012301	0.127542
PHF14	9678	1	CASSETTE	RSN_HUM:NR_033435,RSN_HUM:NR_033436,RSN_HUM:XM_005249911;RSN_HUM:NM_014660,RSN_HUM:XM_005249908,RSN_HUM:XM_005249909,RSN_HUM:XM_005249910	0.153256	0.00159276	0.0258035	0.000352665	0.00159276	0.127452
TUBG2	27175	3	LCASSETTE	RSN_HUM:XM_005257223;RSN_HUM:XM_005257222	0.204983	0.000919588	0.0775876	0.00115353	0.00115353	0.127395
C6orf106	64771	1	CASSETTE	RSN_HUM:NM_022758;RSN_HUM:NM_024294,RSN_HUM:XM_005249298	0.105064	0.00404325	0.232278	0.00195585	0.00404325	0.127214
NEK6	10783	8	CASSETTE	RSN_HUM:NM_014397;RSN_HUM:NM_001145001	0.937768	0.00222816	0.81063	0.000454091	0.00222816	0.127138
AAAS	8086	1	CASSETTE	RSN_HUM:NM_001173466;RSN_HUM:NM_015665	0.202842	0.0037645	0.0757923	0.00344626	0.0037645	0.12705
CLOCK	9575	2	CASSETTE	RSN_HUM:NM_004898,RSN_HUM:XM_005265787;RSN_HUM:NM_001267843	0.857142	0.00140543	0.730353	0.000275346	0.00140543	0.126789
PPP2R1B	5519	1	LCASSETTE	RSN_HUM:NM_181700;RSN_HUM:NM_181699,RSN_HUM:NM_001177562,RSN_HUM:NM_002716	0.0971131	0.00204813	0.223841	0.000949781	0.00204813	0.126728
RBM27	54439	1	CASSETTE	RSN_HUM:XM_005268467,RSN_HUM:XM_005268468;RSN_HUM:XM_005268466,RSN_HUM:NM_018989	0.483338	0.0020257	0.35663	0.00381908	0.00381908	0.126708
NF2	4771	7	CASSETTE	RSN_HUM:NM_000268;RSN_HUM:NM_181832	0.613203	0.00242187	0.486529	0.0013214	0.00242187	0.126674
TRDMT1	1787	5	CASSETTE	RSN_HUM:XM_005252374,RSN_HUM:NM_004412,RSN_HUM:XM_005252373,RSN_HUM:XM_005252375,RSN_HUM:XM_005252372;RSN_HUM:XM_005252376,RSN_HUM:XM_005252378	0.960575	0.00144327	0.833984	0.00362747	0.00362747	0.126591
RBM23	55147	9	CASSETTE	RSN_HUM:XM_005267803,RSN_HUM:XM_005267800;RSN_HUM:XM_005267798,RSN_HUM:XM_005267799	0.768148	0.00185036	0.641594	0.00101544	0.00185036	0.126554
TTLL3	26140	2	CASSETTE	RSN_HUM:NM_001025930;RSN_HUM:NR_037162	0.445446	0.000513643	0.571985	0.00123648	0.00123648	0.126539
TMEM165	55858	1	CASSETTE	RSN_HUM:NM_018475;RSN_HUM:NR_073070	0.992584	0.0143817	0.866174	0.00403135	0.0143817	0.12641
UBE2W	55284	4	CASSETTE	RSN_HUM:NR_073119,RSN_HUM:NR_073120,RSN_HUM:NR_073121;RSN_HUM:NM_001271015,RSN_HUM:NM_001001481,RSN_HUM:NM_018299	0.13498	0.00161703	0.00867363	0.00230584	0.00230584	0.126306
ELP2	55250	7	CASSETTE	RSN_HUM:NM_001242877,RSN_HUM:NM_001242878;RSN_HUM:NM_001242876	0.719202	0.00130381	0.592957	0.00103903	0.00130381	0.126245
IKBIP	121457	1	CASSETTE	RSN_HUM:NM_201613;RSN_HUM:NM_201612	0.153551	0.00693904	0.0274961	0.00980866	0.00980866	0.126055
PPP1CA	5499	3	CASSETTE	RSN_HUM:NM_206873;RSN_HUM:NM_002708	0.0529489	0.0147217	0.178859	0.0123779	0.0147217	0.12591
PRRC2C	23215	6	CASSETTE	RSN_HUM:XM_005245023,RSN_HUM:XM_005245024,RSN_HUM:XM_005245027,RSN_HUM:XM_005245029,RSN_HUM:NM_015172;RSN_HUM:XM_005245015,RSN_HUM:XM_005245017,RSN_HUM:XM_005245018,RSN_HUM:XM_005245019,RSN_HUM:XM_005245022,RSN_HUM:XM_005245016	0.968365	0.00237896	0.842463	0.000244363	0.00237896	0.125902
RALGDS	5900	2	INTERNAL3	RSN_HUM:NM_001042368,RSN_HUM:NM_001271775,RSN_HUM:NM_006266;RSN_HUM:NM_001271774,RSN_HUM:NM_001271776	0.54891	0.00150857	0.674774	0.0015706	0.0015706	0.125864
APBB2	323	4	INTERNAL3	RSN_HUM:NM_001166050;RSN_HUM:NM_004307	0.296585	0.00125441	0.422434	0.00157961	0.00157961	0.125849
2007-03-01	64844	3	CASSETTE	RSN_HUM:NM_001282806;RSN_HUM:NM_001282805,RSN_HUM:NM_022826,RSN_HUM:NM_001282807	0.146986	0.00394596	0.021381	0.00594454	0.00594454	0.125605
2007-03-01	64844	9	CASSETTE	RSN_HUM:XM_005246774;RSN_HUM:XM_005246773	0.146986	0.00394596	0.021381	0.00594454	0.00594454	0.125605
HMGA1	3159	2	CASSETTE	RSN_HUM:NM_145903;RSN_HUM:NM_002131	0.154566	0.0152676	0.280166	0.00800543	0.0152676	0.1256
GGCT	79017	3	MUT_EXCLU	RSN_HUM:NM_001199815;RSN_HUM:NM_024051	0.027291	0.00210106	0.152884	0.00216158	0.00216158	0.125593
ATG9A	79065	1	CASSETTE	RSN_HUM:NM_024085;RSN_HUM:NM_001077198,RSN_HUM:NR_104255	0.183076	0.0020811	0.0574868	0.00114635	0.0020811	0.125589
CD47	961	1	LCASSETTE	RSN_HUM:NM_198793;RSN_HUM:NM_001777	0.956634	0.00388864	0.831076	0.00292156	0.00388864	0.125558
RPS6KC1	26750	9	CASSETTE	RSN_HUM:NM_001287221;RSN_HUM:NM_001287218,RSN_HUM:NM_001287220,RSN_HUM:NM_012424	0.429192	0.00211304	0.554661	0.000586124	0.00211304	0.125469
PIGF	5281	1	CASSETTE	RSN_HUM:NM_002643;RSN_HUM:NM_173074	0.894308	0.00254845	0.768886	0.00158515	0.00254845	0.125422
ATP6V0A1	535	1	INTERNAL3	RSN_HUM:NM_001130020,RSN_HUM:XM_005257459,RSN_HUM:XM_005257461,RSN_HUM:XM_005257463;RSN_HUM:NM_001130021,RSN_HUM:NM_005177	0.248811	0.0009465	0.123398	0.0022075	0.0022075	0.125413
RPE	6120	7	MUT_EXCLU	RSN_HUM:NM_001278282;RSN_HUM:NM_001278285,RSN_HUM:NM_001278289,RSN_HUM:NM_199229	0.0141728	0.0047717	0.139585	0.000924597	0.0047717	0.125412
INPP5K	51763	8	CASSETTE	RSN_HUM:NM_016532;RSN_HUM:NM_130766	0.938187	0.00105835	0.812849	0.00169942	0.00169942	0.125338
CHD9	80205	2	INTERNAL5	RSN_HUM:XM_005256168,RSN_HUM:XM_005256174,RSN_HUM:XM_005256169,RSN_HUM:XM_005256175,RSN_HUM:XM_005256176;RSN_HUM:XM_005256171	0.816078	0.00144409	0.941239	0.00113511	0.00144409	0.125161
CHD9	80205	9	INTERNAL5	RSN_HUM:XM_005256170;RSN_HUM:NM_025134,RSN_HUM:XM_005256172	0.816078	0.00144409	0.941239	0.00113511	0.00144409	0.125161
PXN	5829	17	INTERNAL5	RSN_HUM:XM_005253910,RSN_HUM:XM_005253913,RSN_HUM:XM_005253914,RSN_HUM:XM_005253916,RSN_HUM:XM_005253912;RSN_HUM:XM_005253915	0.0691598	0.0011712	0.194168	0.0007236	0.0011712	0.125008
NLRP1	22861	2	CASSETTE	RSN_HUM:NM_014922,RSN_HUM:NM_033007;RSN_HUM:NM_001033053,RSN_HUM:NM_033004,RSN_HUM:NM_033006	0.306072	0.00150586	0.430986	0.000386788	0.00150586	0.124914
DCAF10	79269	2	CASSETTE	RSN_HUM:XM_005251577;RSN_HUM:XM_005251578,RSN_HUM:NM_001286810,RSN_HUM:NM_024345	0.184645	0.00187928	0.059744	0.00249732	0.00249732	0.124901
INPP5K	51763	7	LCASSETTE	RSN_HUM:NM_016532;RSN_HUM:NM_001135642	0.967604	0.00102618	0.842892	0.00163884	0.00163884	0.124712
GOLGA2	2801	2	CASSETTE	RSN_HUM:XM_005251931,RSN_HUM:XM_005251932;RSN_HUM:NM_004486,RSN_HUM:XM_005251930	0.746205	0.00460303	0.621583	0.00872784	0.00872784	0.124622
TMEM39A	55254	1	CASSETTE	RSN_HUM:NM_018266,RSN_HUM:XM_005247578,RSN_HUM:XM_005247577;RSN_HUM:NR_073506	0.997026	0.0053795	0.872433	0.00506675	0.0053795	0.124593
NCAM1	4684	3	LCASSETTE	RSN_HUM:NM_000615,RSN_HUM:NM_001076682,RSN_HUM:NM_001242608;RSN_HUM:NM_001242607	0.931242	0.0011969	0.806727	0.000932658	0.0011969	0.124515
MELK	9833	14	MUT_EXCLU	RSN_HUM:NM_001256690;RSN_HUM:NM_001256691	0.693531	0.00205306	0.818005	0.000574536	0.00205306	0.124474
CD44	960	59	XCASSETTE	RSN_HUM:XM_005253238;RSN_HUM:XM_005253233,RSN_HUM:XM_005253234	0.971807	0.00133843	0.847432	0.00605085	0.00605085	0.124375
DOCK10	55619	3	CASSETTE	RSN_HUM:NM_001290263,RSN_HUM:NM_014689,RSN_HUM:XM_005246673;RSN_HUM:XM_005246672	0.987612	0.00159423	0.8633	0.0001624	0.00159423	0.124312
TPM1	7168	4	MUT_EXCLU	RSN_HUM:NM_000366,RSN_HUM:NM_001018004,RSN_HUM:NM_001018005,RSN_HUM:NM_001018006;RSN_HUM:NM_001018007,RSN_HUM:NM_001018020	0.94257	0.0671337	0.818271	0.0726499	0.0726499	0.124299
LRCH3	84859	1	CASSETTE	RSN_HUM:XM_005269363,RSN_HUM:XM_005269367;RSN_HUM:XM_005269362,RSN_HUM:XM_005269365,RSN_HUM:NM_032773	0.924003	0.0087292	0.79973	0.00202477	0.0087292	0.124273
SEC13	6396	12	CASSETTE	RSN_HUM:NM_183352,RSN_HUM:NM_001278946;RSN_HUM:NM_030673	0.974374	0.00758315	0.850276	0.00820736	0.00820736	0.124098
MYO5A	4644	2	CASSETTE	RSN_HUM:NM_000259,RSN_HUM:NM_001142495,RSN_HUM:XM_005254401,RSN_HUM:XM_005254402;RSN_HUM:XM_005254397,RSN_HUM:XM_005254398,RSN_HUM:XM_005254399,RSN_HUM:XM_005254400,RSN_HUM:XM_005254403	0.931988	0.00231325	0.807935	0.00174649	0.00231325	0.124053
SNRK	54861	4	CASSETTE	RSN_HUM:NM_017719;RSN_HUM:XM_005265245	0.836279	0.00041015	0.712349	0.00102702	0.00102702	0.12393
CLK2	1196	1	INTERNAL3	RSN_HUM:NM_003993;RSN_HUM:XM_005244876	0.253812	0.000787067	0.377587	0.0027538	0.0027538	0.123775
SIRT1	23411	2	CASSETTE	RSN_HUM:NM_001142498;RSN_HUM:NM_012238	0.470153	0.00242198	0.346419	0.00191762	0.00242198	0.123734
PRKAG1	5571	6	INTERNAL3	RSN_HUM:NM_001206710,RSN_HUM:NM_002733;RSN_HUM:XM_005269020	0.977137	0.00495988	0.853449	0.00798834	0.00798834	0.123688
DROSHA	29102	5	CASSETTE	RSN_HUM:XM_005248294;RSN_HUM:NM_001100412	0.208222	0.00159205	0.0848891	0.0003428	0.00159205	0.123333
RPS6KC1	26750	2	CASSETTE	RSN_HUM:NM_001136138,RSN_HUM:NM_001287219,RSN_HUM:NM_001287220,RSN_HUM:NM_001287221,RSN_HUM:NM_012424;RSN_HUM:NM_001287218	0.978462	0.00217293	0.855147	0.000531572	0.00217293	0.123315
POLR3E	55718	3	CASSETTE	RSN_HUM:NM_001258036;RSN_HUM:NM_001258033	0.167578	0.000706538	0.0442708	0.001536	0.001536	0.123307
PI16	221476	2	INTERNAL5	RSN_HUM:NM_001199159,RSN_HUM:NM_153370;RSN_HUM:XM_005248917	0.692288	0.00305383	0.815584	0.00271993	0.00305383	0.123296
SAMD4A	23034	1	CASSETTE	RSN_HUM:NM_001161576;RSN_HUM:NM_015589	0.575403	0.00288198	0.698686	0.0022163	0.00288198	0.123283
CHEK1	1111	5	CASSETTE	RSN_HUM:NM_001244846;RSN_HUM:NM_001114122,RSN_HUM:NR_045204,RSN_HUM:NR_045205,RSN_HUM:NM_001274	0.686749	0.00609862	0.56361	0.00214865	0.00609862	0.123139
LSM14B	149986	2	CASSETTE	RSN_HUM:XM_005260303;RSN_HUM:NM_144703	0.330846	0.0033907	0.207715	0.00134367	0.0033907	0.123131
ENTPD6	955	3	CASSETTE	RSN_HUM:XM_005260884,RSN_HUM:XM_005260885,RSN_HUM:XM_005260887;RSN_HUM:XM_005260878,RSN_HUM:XM_005260881,RSN_HUM:NM_001114089,RSN_HUM:NM_001247,RSN_HUM:XM_005260886,RSN_HUM:XM_005260882,RSN_HUM:XM_005260883	0.277697	0.00296247	0.154609	0.00220039	0.00296247	0.123088
ZFAND1	79752	2	CASSETTE	RSN_HUM:NR_033193,RSN_HUM:NR_033194,RSN_HUM:NR_033195,RSN_HUM:NR_033196;RSN_HUM:NM_001170796,RSN_HUM:NM_024699,RSN_HUM:NM_001170797	0.326554	0.00195143	0.203512	0.00153394	0.00195143	0.123042
MROH1	727957	6	CASSETTE	RSN_HUM:NM_001288814;RSN_HUM:NM_032450	0.896957	0.00147365	0.773946	0.0023866	0.0023866	0.123011
TTC3	7267	10	CASSETTE	RSN_HUM:NM_001001894,RSN_HUM:XM_005261052,RSN_HUM:XM_005261053,RSN_HUM:XM_005261046,RSN_HUM:XM_005261051,RSN_HUM:XM_005261054,RSN_HUM:NM_003316;RSN_HUM:XM_005261049,RSN_HUM:XM_005261048,RSN_HUM:XM_005261058,RSN_HUM:XM_005261045,RSN_HUM:XM_005261047,RSN_HUM:XM_005261050	0.908566	0.00272273	0.785636	0.00278895	0.00278895	0.12293
BRD9	65980	3	INTERNAL3	RSN_HUM:NM_001009877,RSN_HUM:NM_023924;RSN_HUM:NR_027633	0.784966	0.00267317	0.662043	0.0011031	0.00267317	0.122923
HSD17B4	3295	3	CASSETTE	RSN_HUM:NM_000414;RSN_HUM:NM_001199291	0.987844	0.00269825	0.864971	0.00154855	0.00269825	0.122873
UCHL5	51377	2	CASSETTE	RSN_HUM:NM_001199261,RSN_HUM:NM_015984,RSN_HUM:XM_005245245,RSN_HUM:XM_005245246,RSN_HUM:XM_005245247,RSN_HUM:XM_005245248,RSN_HUM:XM_005245249,RSN_HUM:NM_001199262,RSN_HUM:NM_001199263,RSN_HUM:NR_037607;RSN_HUM:XM_005245244	0.968452	0.0113058	0.845595	0.00676856	0.0113058	0.122857
POLDIP3	84271	2	CASSETTE	RSN_HUM:NM_178136;RSN_HUM:NM_001278657	0.261443	0.00188034	0.138696	0.000664043	0.00188034	0.122747
RABGEF1	27342	5	CASSETTE	RSN_HUM:NM_014504;RSN_HUM:NM_001287062	0.750736	0.00225272	0.628116	0.0018155	0.00225272	0.12262
MTMR3	8897	4	CASSETTE	RSN_HUM:NM_153050,RSN_HUM:NM_153051,RSN_HUM:XM_005261807,RSN_HUM:XM_005261808;RSN_HUM:XM_005261804,RSN_HUM:NM_021090,RSN_HUM:XM_005261803,RSN_HUM:XM_005261805,RSN_HUM:XM_005261806,RSN_HUM:XM_005261809	0.175518	0.00109305	0.0529317	0.00295286	0.00295286	0.122586
ZFAS1	441951	3	CASSETTE	RSN_HUM:NR_036658,RSN_HUM:NR_036659;RSN_HUM:NR_003605,RSN_HUM:NR_003604	0.295875	0.0168502	0.173323	0.0328827	0.0328827	0.122552
RBM39	9584	4	CASSETTE	RSN_HUM:NM_001242599,RSN_HUM:NM_001242600,RSN_HUM:NM_004902,RSN_HUM:NM_184234,RSN_HUM:NR_040722,RSN_HUM:NR_040724;RSN_HUM:NR_040723	0.980016	0.00933979	0.857584	0.00973156	0.00973156	0.122432
SPNS1	83985	2	CASSETTE	RSN_HUM:NM_001142449,RSN_HUM:NM_001142451;RSN_HUM:XM_005255618,RSN_HUM:NM_001142448,RSN_HUM:NM_001142450,RSN_HUM:NM_032038	0.447118	0.00605456	0.324694	0.00430898	0.00605456	0.122424
PTCD2	79810	7	LCASSETTE	RSN_HUM:NM_001284404;RSN_HUM:NM_024754,RSN_HUM:XM_005248601	0.698059	0.00295606	0.575985	0.00183321	0.00295606	0.122074
MBNL1	4154	28	CASSETTE	RSN_HUM:XM_005247467,RSN_HUM:XM_005247468;RSN_HUM:NM_207292,RSN_HUM:XM_005247461,RSN_HUM:XM_005247463,RSN_HUM:XM_005247466,RSN_HUM:NM_207293,RSN_HUM:NM_207294	0.196901	0.00433974	0.07496	0.00209779	0.00433974	0.121941
SLMAP	7871	24	MUT_EXCLU	RSN_HUM:XM_005265465,RSN_HUM:XM_005265466,RSN_HUM:NM_007159;RSN_HUM:XM_005265467,RSN_HUM:XM_005265472	0.333298	0.00115248	0.45513	0.000323952	0.00115248	0.121832
TLE4	7091	5	INTERNAL3	RSN_HUM:NM_001282748,RSN_HUM:NM_001282753,RSN_HUM:NM_001282760,RSN_HUM:NM_007005,RSN_HUM:XM_005252174;RSN_HUM:NR_104239,RSN_HUM:XM_005252169,RSN_HUM:XM_005252173,RSN_HUM:XM_005252177	0.690521	0.00115533	0.56871	0.000248035	0.00115533	0.121811
KIAA0232	9778	3	CASSETTE	RSN_HUM:NM_001100590,RSN_HUM:NM_014743;RSN_HUM:XM_005248041	0.88387	0.0011401	0.762086	0.000962884	0.0011401	0.121784
KIAA1217	56243	26	LCASSETTE	RSN_HUM:NM_001282768,RSN_HUM:XM_005252518;RSN_HUM:NM_019590,RSN_HUM:XM_005252502,RSN_HUM:XM_005252505,RSN_HUM:XM_005252508	0.938583	0.00638185	0.816878	0.0180418	0.0180418	0.121705
RPAIN	84268	3	LCASSETTE	RSN_HUM:NM_001160266;RSN_HUM:NM_001033002	0.099619	0.00108012	0.221202	0.00151174	0.00151174	0.121583
BCL2L13	23786	42	CASSETTE	RSN_HUM:NM_001270735;RSN_HUM:NM_001270734,RSN_HUM:NR_073068	0.318765	0.00167459	0.440298	0.00294278	0.00294278	0.121533
TLE2	7089	2	CASSETTE	RSN_HUM:NM_001144761;RSN_HUM:NM_001144762,RSN_HUM:NM_003260	0.468557	0.00097875	0.347048	0.00113385	0.00113385	0.121509
BIRC5	332	3	CASSETTE	RSN_HUM:NM_001168;RSN_HUM:NM_001012271	0.915703	0.00974237	0.794258	0.00757454	0.00974237	0.121445
ANXA2	302	3	CASSETTE	RSN_HUM:NM_004039;RSN_HUM:NM_001002857	0.748348	0.083304	0.627228	0.10079	0.10079	0.12112
BRD1	23774	2	INTERNAL3	RSN_HUM:XM_005261470,RSN_HUM:XM_005261471,RSN_HUM:XM_005261473;RSN_HUM:XM_005261472,RSN_HUM:NM_014577	0.252362	0.00126505	0.131355	0.00200738	0.00200738	0.121007
OPA1	4976	2	MUT_EXCLU	RSN_HUM:NM_015560,RSN_HUM:NM_130836;RSN_HUM:NM_130832,RSN_HUM:NM_130835	0.921246	0.00257037	0.800275	0.00103765	0.00257037	0.120971
CKAP2	26586	1	INTERNAL3	RSN_HUM:NM_001098525,RSN_HUM:XM_005266343,RSN_HUM:XM_005266344;RSN_HUM:NM_001286687,RSN_HUM:NM_018204,RSN_HUM:NM_001286686	0.190098	0.00545508	0.310872	0.00127577	0.00545508	0.120774
POGK	57645	1	CASSETTE	RSN_HUM:XM_005245372;RSN_HUM:XM_005245371	0.055668	0.00121075	0.176442	0.0020664	0.0020664	0.120774
RAB28	9364	7	CASSETTE	RSN_HUM:NM_001017979;RSN_HUM:NM_004249	0.602741	0.00152885	0.482024	0.00068565	0.00152885	0.120717
CD59	966	6	CASSETTE	RSN_HUM:NM_000611;RSN_HUM:NM_203331	0.712344	0.0288549	0.591737	0.0445839	0.0445839	0.120607
GNPDA2	132789	14	XCASSETTE	RSN_HUM:NR_073095;RSN_HUM:NM_138335	0.0511198	0.00165689	0.171643	0.000632125	0.00165689	0.120523
HIBCH	26275	1	CASSETTE	RSN_HUM:NM_198047;RSN_HUM:NM_014362	0.153137	0.00156265	0.273639	0.00018455	0.00156265	0.120502
BRD8	10902	5	CASSETTE	RSN_HUM:NM_001164326;RSN_HUM:NM_006696	0.289256	0.00241724	0.16907	0.00427398	0.00427398	0.120186
SNX17	9784	5	MUT_EXCLU	RSN_HUM:NM_001267061,RSN_HUM:NM_014748;RSN_HUM:NR_049786	0.986724	0.00914248	0.866567	0.00826912	0.00914248	0.120157
CTNND1	1500	3	CASSETTE	RSN_HUM:NM_001085460,RSN_HUM:NM_001085462,RSN_HUM:NM_001085464,RSN_HUM:NM_001085465,RSN_HUM:NM_001085468,RSN_HUM:NM_001085469,RSN_HUM:NM_001206886,RSN_HUM:NM_001206887,RSN_HUM:NM_001206888,RSN_HUM:NM_001206889,RSN_HUM:NM_001206890,RSN_HUM:NM_001085459,RSN_HUM:NM_001085461,RSN_HUM:NM_001085467,RSN_HUM:NM_001206891,RSN_HUM:NM_001331;RSN_HUM:NM_001085463,RSN_HUM:NM_001085466,RSN_HUM:NM_001206883,RSN…	0.9949	0.00539238	0.874746	0.0006395	0.00539238	0.120154
ENTPD6	955	9	CASSETTE	RSN_HUM:NM_001114089;RSN_HUM:NM_001247	0.574523	0.00183927	0.454387	0.000853458	0.00183927	0.120136
DLG1	1739	1	MUT_EXCLU	RSN_HUM:NM_001098424,RSN_HUM:NM_001204387,RSN_HUM:NM_001204388,RSN_HUM:NM_001290983,RSN_HUM:XM_005269298,RSN_HUM:XM_005269299,RSN_HUM:XM_005269301;RSN_HUM:NM_001204386	0.135877	0.00254217	0.256	0.000490579	0.00254217	0.120123
CHORDC1	26973	1	CASSETTE	RSN_HUM:NM_001144073;RSN_HUM:NM_012124	0.357954	0.0032303	0.47807	0.0008641	0.0032303	0.120116
PIGG	54872	2	LCASSETTE	RSN_HUM:NM_001289052;RSN_HUM:NM_001289051,RSN_HUM:NM_001127178,RSN_HUM:NM_017733,RSN_HUM:NR_110293,RSN_HUM:NM_001289057,RSN_HUM:NM_001289053	0.438904	0.00404781	0.558968	0.00497703	0.00497703	0.120064
ATG12	9140	7	LCASSETTE	RSN_HUM:NM_004707;RSN_HUM:NR_073603	0.981215	0.00505116	0.86117	0.00500468	0.00505116	0.120045
STK39	27347	2	CASSETTE	RSN_HUM:XM_005246465;RSN_HUM:NM_013233,RSN_HUM:XM_005246466	0.232991	0.00249065	0.112981	0.00086475	0.00249065	0.12001
TRPM7	54822	2	INTERNAL3	RSN_HUM:NM_017672,RSN_HUM:XM_005254486,RSN_HUM:XM_005254489;RSN_HUM:XM_005254487,RSN_HUM:XM_005254488	0.639507	0.0023527	0.75934	0.0021207	0.0023527	0.119833
PAK4	10298	1	LCASSETTE	RSN_HUM:NM_001014832,RSN_HUM:NM_001014834;RSN_HUM:NM_001014831	0.538311	0.00156973	0.418537	0.000687514	0.00156973	0.119774
MYNN	55892	3	CASSETTE	RSN_HUM:XM_005247621;RSN_HUM:XM_005247622,RSN_HUM:XM_005247624,RSN_HUM:NM_001185118,RSN_HUM:NM_018657,RSN_HUM:NR_033702,RSN_HUM:NR_033703	0.165237	0.0012237	0.0455019	0.00130984	0.00130984	0.119735
CIRH1A	84916	1	INTERNAL3	RSN_HUM:NM_032830;RSN_HUM:XM_005256204	0.69529	0.0012484	0.57563	0.0014452	0.0014452	0.11966
OSBPL9	114883	2	CASSETTE	RSN_HUM:NM_148908,RSN_HUM:NM_148909,RSN_HUM:NM_148907,RSN_HUM:NM_148904,RSN_HUM:NM_148905;RSN_HUM:NM_024586,RSN_HUM:NM_148906,RSN_HUM:NR_036662	0.151326	0.00158092	0.270969	0.000333618	0.00158092	0.119643
ELP4	26610	1	INTERNAL3	RSN_HUM:NM_001288725,RSN_HUM:XM_005252865;RSN_HUM:NM_001288726,RSN_HUM:NM_019040	0.147675	0.0011979	0.267226	0.0005123	0.0011979	0.119551
TJAP1	93643	10	INTERNAL5	RSN_HUM:NM_001146018,RSN_HUM:NM_001146020,RSN_HUM:NM_001146017;RSN_HUM:NR_027394	0.93617	0.00135704	0.816648	0.00159965	0.00159965	0.119522
TLK2	11011	10	CASSETTE	RSN_HUM:XM_005256974,RSN_HUM:XM_005256973,RSN_HUM:XM_005256975;RSN_HUM:XM_005256971,RSN_HUM:NM_001284363	0.130533	0.00118131	0.0110262	0.000834378	0.00118131	0.119507
ARNTL2	56938	5	LCASSETTE	RSN_HUM:NM_001248004,RSN_HUM:NM_001248003,RSN_HUM:NM_001248005;RSN_HUM:NM_020183	0.852141	0.00139077	0.73264	0.000846255	0.00139077	0.119501
PPP2R1B	5519	3	CASSETTE	RSN_HUM:NM_001177562;RSN_HUM:NM_181699,RSN_HUM:NM_181700,RSN_HUM:NM_001177563,RSN_HUM:NM_002716	0.165689	0.00146962	0.285175	0.000764442	0.00146962	0.119486
SKA2	348235	2	CASSETTE	RSN_HUM:NM_001100595;RSN_HUM:NM_182620	0.390731	0.00681083	0.271295	0.00470484	0.00681083	0.119436
RUSC1	23623	1	INTERNAL3	RSN_HUM:NM_001105203,RSN_HUM:NM_001105205,RSN_HUM:NM_001278227,RSN_HUM:NM_001278228,RSN_HUM:NM_014328,RSN_HUM:NM_001278230;RSN_HUM:NM_001105204,RSN_HUM:NM_001278229,RSN_HUM:NR_103478	0.932218	0.00310886	0.81283	0.00167495	0.00310886	0.119388
CHFR	55743	5	LCASSETTE	RSN_HUM:NM_001161347;RSN_HUM:NM_001161346	0.140951	0.000932947	0.0215637	0.00142833	0.00142833	0.119387
TTC7A	57217	5	CASSETTE	RSN_HUM:NM_001288953,RSN_HUM:NM_001288951,RSN_HUM:NM_001288955,RSN_HUM:NM_020458,RSN_HUM:XM_005264440;RSN_HUM:XM_005264439	0.730779	0.00205983	0.61166	0.00148568	0.00205983	0.119119
MAU2	23383	2	INTERNAL5	RSN_HUM:XM_005259837;RSN_HUM:XM_005259838,RSN_HUM:NM_015329	0.281796	0.0011668	0.162681	0.0021201	0.0021201	0.119115
MON2	23041	4	CASSETTE	RSN_HUM:NM_001278469,RSN_HUM:NM_001278470,RSN_HUM:NM_001278471,RSN_HUM:NM_015026,RSN_HUM:XM_005268731,RSN_HUM:XM_005268732;RSN_HUM:NM_001278472	0.979734	0.0011053	0.860625	0.0001887	0.0011053	0.119109
ICOSLG	23308	4	CASSETTE	RSN_HUM:NM_001283051;RSN_HUM:NM_001283052	0	1.57022e-05	0.119004	0.00831482	0.00831482	0.119004
RHOC	389	2	CASSETTE	RSN_HUM:NM_001042678;RSN_HUM:NM_175744	0.487876	0.0237091	0.368961	0.0268335	0.0268335	0.118915
KANSL1	284058	5	CASSETTE	RSN_HUM:XM_005257234,RSN_HUM:XM_005257235;RSN_HUM:NM_001193465,RSN_HUM:NM_001193466,RSN_HUM:NM_015443,RSN_HUM:XM_005257232,RSN_HUM:XM_005257233	0.181308	0.00124181	0.0624352	0.00107311	0.00124181	0.118873
BCL2L13	23786	20	LCASSETTE	RSN_HUM:NM_001270728;RSN_HUM:NM_001270731	0.290471	0.00194615	0.40934	0.00316265	0.00316265	0.118869
ZC3H14	79882	11	CASSETTE	RSN_HUM:NM_207660,RSN_HUM:XM_005268071;RSN_HUM:XM_005268069,RSN_HUM:XM_005268070,RSN_HUM:NM_207661	0.262621	0.00179803	0.14379	0.00111969	0.00179803	0.118831
TCF7L2	6934	2	CASSETTE	RSN_HUM:NM_001146274,RSN_HUM:NM_001146284,RSN_HUM:NM_001146285,RSN_HUM:NM_001146286,RSN_HUM:NM_001198525,RSN_HUM:NM_001198526,RSN_HUM:NM_001198527,RSN_HUM:NM_001198528,RSN_HUM:NM_001198529,RSN_HUM:NM_001198531,RSN_HUM:NM_030756;RSN_HUM:NM_001146283	0.912274	0.00100736	0.793652	0.000227855	0.00100736	0.118622
KIAA1217	56243	18	CASSETTE	RSN_HUM:NM_001282767,RSN_HUM:XM_005252517;RSN_HUM:NM_019590,RSN_HUM:XM_005252500,RSN_HUM:XM_005252501,RSN_HUM:XM_005252502,RSN_HUM:XM_005252503,RSN_HUM:XM_005252504,RSN_HUM:XM_005252505,RSN_HUM:XM_005252506,RSN_HUM:XM_005252507,RSN_HUM:XM_005252508,RSN_HUM:XM_005252512,RSN_HUM:XM_005252513,RSN_HUM:XM_005252509,RSN_HUM:XM_005252514,RSN_HUM:XM_005252515	0.930985	0.00574623	0.812434	0.0177616	0.0177616	0.118551
LRRFIP1	9208	78	MUT_EXCLU	RSN_HUM:XM_005246120;RSN_HUM:XM_005246121,RSN_HUM:XM_005246124	0.828162	4.02226e-05	0.709732	0.00131779	0.00131779	0.11843
LUZP1	7798	1	CASSETTE	RSN_HUM:NM_001142546;RSN_HUM:NM_033631	0.582196	0.00108795	0.464112	0.00075025	0.00108795	0.118084
RASA3	22821	1	LCASSETTE	RSN_HUM:NM_007368;RSN_HUM:XM_005266196	0.956709	0.00298858	0.838648	0.00130913	0.00298858	0.118061
PQLC3	130814	4	LCASSETTE	RSN_HUM:NM_001282710;RSN_HUM:NR_104231	0.367205	0.00104438	0.249164	0.000752114	0.00104438	0.118041
IVD	3712	5	CASSETTE	RSN_HUM:XM_005254356;RSN_HUM:NM_001159508,RSN_HUM:NM_002225,RSN_HUM:XM_005254350	0.804378	0.0130843	0.686345	0.00435806	0.0130843	0.118033
SLC4A7	9497	2	CASSETTE	RSN_HUM:NM_001258380,RSN_HUM:NM_003615,RSN_HUM:XM_005265601;RSN_HUM:NM_001258379,RSN_HUM:XM_005265598,RSN_HUM:XM_005265599,RSN_HUM:XM_005265600	0.143843	0.0014349	0.0258908	0.00112395	0.0014349	0.117952
CAMKK2	10645	3	CASSETTE	RSN_HUM:NM_153500,RSN_HUM:NM_172216,RSN_HUM:XM_005253822,RSN_HUM:XM_005253824,RSN_HUM:NM_172215;RSN_HUM:NM_001270486,RSN_HUM:NM_001270485,RSN_HUM:NM_006549,RSN_HUM:NM_153499,RSN_HUM:NM_172226,RSN_HUM:NM_172214,RSN_HUM:XM_005253823	0.262975	0.00244373	0.145024	0.00191693	0.00244373	0.117951
KIAA1217	56243	27	XCASSETTE	RSN_HUM:NM_001282768,RSN_HUM:XM_005252518;RSN_HUM:XM_005252500,RSN_HUM:XM_005252501,RSN_HUM:XM_005252503,RSN_HUM:XM_005252504,RSN_HUM:XM_005252507,RSN_HUM:XM_005252512,RSN_HUM:XM_005252513,RSN_HUM:XM_005252509,RSN_HUM:XM_005252514,RSN_HUM:XM_005252515	0.941488	0.00636216	0.82367	0.017893	0.017893	0.117818
RC3H1	149041	3	INTERNAL3	RSN_HUM:NM_172071,RSN_HUM:XM_005244920,RSN_HUM:XM_005244918,RSN_HUM:XM_005244919;RSN_HUM:XM_005244921	1	0.0003562	0.882223	0.0010902	0.0010902	0.117777
ACIN1	22985	4	INTERNAL3	RSN_HUM:NM_001164814;RSN_HUM:XM_005267415	0.213413	0.00600259	0.331066	0.00520983	0.00600259	0.117653
ACIN1	22985	10	INTERNAL3	RSN_HUM:NM_001164815,RSN_HUM:NM_001164816,RSN_HUM:NM_001164817,RSN_HUM:NM_014977,RSN_HUM:XM_005267418;RSN_HUM:XM_005267416	0.786587	0.00600259	0.668934	0.00520983	0.00600259	0.117653
HDAC8	55869	4	CASSETTE	RSN_HUM:NM_001166448;RSN_HUM:NM_001166418,RSN_HUM:NM_018486,RSN_HUM:NR_051952,RSN_HUM:NM_001166419	0.41467	0.00136743	0.532226	0.000428891	0.00136743	0.117556
LRRFIP2	9209	10	CASSETTE	RSN_HUM:NM_001134369,RSN_HUM:NM_001282691,RSN_HUM:NM_006309,RSN_HUM:NM_017724,RSN_HUM:XM_005265538,RSN_HUM:XM_005265539,RSN_HUM:XM_005265550,RSN_HUM:XM_005265551,RSN_HUM:XM_005265553,RSN_HUM:XM_005265554,RSN_HUM:XM_005265556,RSN_HUM:XM_005265557;RSN_HUM:XM_005265540,RSN_HUM:XM_005265555	0.956004	0.00359035	0.838552	0.00428566	0.00428566	0.117452
GOSR1	9527	1	INTERNAL5	RSN_HUM:NM_001007025;RSN_HUM:NM_004871	0.571183	0.00222526	0.453741	0.00256887	0.00256887	0.117442
CDK14	5218	5	CASSETTE	RSN_HUM:NM_001287137;RSN_HUM:NM_001287135,RSN_HUM:XM_005250436,RSN_HUM:XM_005250435,RSN_HUM:NM_012395,RSN_HUM:NM_001287136,RSN_HUM:XM_005250439,RSN_HUM:XM_005250438	0.405051	0.00188371	0.522426	0.000678756	0.00188371	0.117375
C11orf49	79096	1	CASSETTE	RSN_HUM:NM_001278222;RSN_HUM:NM_001003676,RSN_HUM:NM_001003677,RSN_HUM:NM_001003678,RSN_HUM:NM_024113,RSN_HUM:NR_103471	0.191454	0.00269568	0.308739	0.00100117	0.00269568	0.117285
SH2B3	10019	2	INTERNAL3	RSN_HUM:XM_005253818,RSN_HUM:NM_005475;RSN_HUM:XM_005253819	0.865405	0.00213492	0.748176	0.00325743	0.00325743	0.117229
TPGS2	25941	8	LCASSETTE	RSN_HUM:NM_001271955;RSN_HUM:NM_001271951	0.200924	0.0122848	0.0837386	0.00977924	0.0122848	0.117185
MBNL2	10150	4	CASSETTE	RSN_HUM:XM_005254021,RSN_HUM:XM_005254022;RSN_HUM:XM_005254018,RSN_HUM:NM_144778	0.99822	0.00129245	0.881189	0.00154689	0.00154689	0.117031
SPATS2L	26010	9	CASSETTE	RSN_HUM:NM_015535,RSN_HUM:NM_001282735,RSN_HUM:XM_005246454,RSN_HUM:NM_001100422,RSN_HUM:NM_001100424,RSN_HUM:NM_001100423,RSN_HUM:XM_005246459,RSN_HUM:NM_001282744;RSN_HUM:XM_005246456,RSN_HUM:XM_005246460	0.957604	0.00577494	0.84059	0.00721809	0.00721809	0.117014
SLMAP	7871	5	CASSETTE	RSN_HUM:XM_005265462,RSN_HUM:XM_005265463,RSN_HUM:XM_005265464;RSN_HUM:XM_005265456,RSN_HUM:XM_005265457,RSN_HUM:XM_005265458,RSN_HUM:XM_005265460,RSN_HUM:XM_005265468,RSN_HUM:XM_005265469	0.826719	0.00198133	0.709841	0.0007489	0.00198133	0.116878
BCL2L13	23786	3	CASSETTE	RSN_HUM:NM_001270726,RSN_HUM:NM_001270727,RSN_HUM:NM_001270730;RSN_HUM:NM_001270729,RSN_HUM:NM_001270731,RSN_HUM:NM_001270732,RSN_HUM:NM_001270734,RSN_HUM:NM_001270735,RSN_HUM:NM_015367	0.256012	0.0022383	0.372611	0.00344747	0.00344747	0.116599
ZC3H14	79882	9	LCASSETTE	RSN_HUM:XM_005268069,RSN_HUM:XM_005268070,RSN_HUM:NM_207661,RSN_HUM:NM_207662;RSN_HUM:NM_001160104,RSN_HUM:XM_005268067	0.344883	0.00227012	0.461448	0.00142118	0.00227012	0.116565
MON2	23041	1	CASSETTE	RSN_HUM:NM_001278470,RSN_HUM:NM_001278471,RSN_HUM:XM_005268732;RSN_HUM:NM_001278469,RSN_HUM:NM_001278472,RSN_HUM:NM_015026,RSN_HUM:XM_005268731,RSN_HUM:XM_005268734,RSN_HUM:XM_005268735,RSN_HUM:XM_005268736	0.156545	0.00142962	0.0400768	0.000404224	0.00142962	0.116468
PKP4	8502	1	CASSETTE	RSN_HUM:NM_001005476;RSN_HUM:NM_003628	0.829146	0.00407805	0.712708	0.000934604	0.00407805	0.116438
RAB18	22931	6	MUT_M_EXCLU	RSN_HUM:NM_001256411;RSN_HUM:NM_001256412	0.406336	0.00772682	0.289991	0.0124343	0.0124343	0.116345
MAP4K4	9448	6	CASSETTE	RSN_HUM:NM_001242560,RSN_HUM:NM_004834,RSN_HUM:XM_005264053,RSN_HUM:XM_005264054,RSN_HUM:XM_005264055,RSN_HUM:XM_005264056,RSN_HUM:XM_005264069,RSN_HUM:XM_005264071,RSN_HUM:NM_001242559,RSN_HUM:NM_145687;RSN_HUM:NM_145686,RSN_HUM:XM_005264044,RSN_HUM:XM_005264045,RSN_HUM:XM_005264046,RSN_HUM:XM_005264047,RSN_HUM:XM_005264048,RSN_HUM:XM_005264049,RSN_HUM:XM_005264050,RSN_HUM:XM_005264052,RSN_HUM:X…	0.436579	0.0170555	0.320383	0.0149693	0.0170555	0.116196
HNRNPAB	3182	1	CASSETTE	RSN_HUM:NM_004499;RSN_HUM:NM_031266	0.333963	0.0098499	0.217917	0.0175929	0.0175929	0.116046
STEAP3	55240	3	MUT_EXCLU	RSN_HUM:NM_018234;RSN_HUM:NM_182915	0.144694	0.00105391	0.260601	0.000683206	0.00105391	0.115907
MDM2	4193	5	XCASSETTE	RSN_HUM:NM_001145340,RSN_HUM:NM_001278462;RSN_HUM:NM_001145339	0.471319	0.0041701	0.355551	0.0228263	0.0228263	0.115768
FRS2	10818	3	CASSETTE	RSN_HUM:NM_001278353,RSN_HUM:NM_001278356,RSN_HUM:NM_006654;RSN_HUM:NM_001042555	0.987792	0.00131472	0.872058	0.00129785	0.00131472	0.115734
SMARCD1	6602	1	CASSETTE	RSN_HUM:XM_005269107;RSN_HUM:NM_003076,RSN_HUM:NM_139071	0.190715	0.00255302	0.0750419	0.00044775	0.00255302	0.115673
ASNS	440	5	CASSETTE	RSN_HUM:NM_001178075,RSN_HUM:NM_001673;RSN_HUM:NM_183356	0.804879	0.00443743	0.920525	0.00366432	0.00443743	0.115646
ARID5A	10865	2	CASSETTE	RSN_HUM:XM_005263860;RSN_HUM:NM_212481,RSN_HUM:XM_005263856	0.516626	0.00112951	0.401078	0.00113419	0.00113419	0.115548
MASP1	5648	2	CASSETTE	RSN_HUM:NR_033519;RSN_HUM:NM_001879,RSN_HUM:NM_139125,RSN_HUM:NM_001031849	0.443098	0.00941574	0.32759	0.0110724	0.0110724	0.115508
SBF1	6305	3	CASSETTE	RSN_HUM:XM_005261934,RSN_HUM:XM_005261935;RSN_HUM:NM_002972,RSN_HUM:XM_005261931,RSN_HUM:XM_005261932	0.280619	0.0035158	0.165219	0.0054092	0.0054092	0.1154
CEP57L1	285753	1	INTERNAL3	RSN_HUM:XM_005266937;RSN_HUM:XM_005266935,RSN_HUM:XM_005266936,RSN_HUM:XM_005266938,RSN_HUM:NM_001083535,RSN_HUM:NM_001271852,RSN_HUM:NM_001271853,RSN_HUM:NM_173830	0.114389	0.00127023	0.229764	0.0003904	0.00127023	0.115375
C2orf43	60526	11	LCASSETTE	RSN_HUM:NM_001282722;RSN_HUM:NM_001282723,RSN_HUM:NM_021925	0.613294	0.00169723	0.728566	0.000533788	0.00169723	0.115272
MORF4L2	9643	9	INTERNAL3	RSN_HUM:NM_001142419,RSN_HUM:NM_012286;RSN_HUM:NM_001142425,RSN_HUM:NM_001142427	0.85136	0.00547463	0.736126	0.000628898	0.00547463	0.115234
PHF20L1	51105	1	CASSETTE	RSN_HUM:NM_001277196,RSN_HUM:NM_198513,RSN_HUM:XM_005250935,RSN_HUM:XM_005250936,RSN_HUM:XM_005250937;RSN_HUM:NM_016018,RSN_HUM:XM_005250933,RSN_HUM:XM_005250934	0.932839	0.00204687	0.817653	0.00219766	0.00219766	0.115186
KIAA1217	56243	9	LCASSETTE	RSN_HUM:NM_001098500,RSN_HUM:XM_005252520,RSN_HUM:XM_005252522;RSN_HUM:XM_005252506	0.934078	0.00579861	0.818992	0.0176674	0.0176674	0.115086
RPP14	11102	1	CASSETTE	RSN_HUM:NR_049756,RSN_HUM:NR_049757;RSN_HUM:NM_007042	0.254934	0.00116285	0.139922	0.00120102	0.00120102	0.115012
PEX11B	8799	4	INTERNAL3	RSN_HUM:NM_003846;RSN_HUM:NR_073492	1	0.0018531	0.885189	8.71e-05	0.0018531	0.114811
CD44	960	47	XCASSETTE	RSN_HUM:NM_001202556;RSN_HUM:XM_005253231	0.224188	0.00398593	0.109428	0.00882313	0.00882313	0.11476
BCL2L11	10018	1	LCASSETTE	RSN_HUM:NM_001204106,RSN_HUM:NM_006538,RSN_HUM:NM_138621,RSN_HUM:NM_138624,RSN_HUM:NM_138625;RSN_HUM:NM_001204107	0.965699	5.20605e-05	0.851118	0.00140772	0.00140772	0.114581
PXK	54899	6	LCASSETTE	RSN_HUM:NM_001289101;RSN_HUM:NM_001289095	0.0630511	0.00401896	0.17759	0.00141675	0.00401896	0.114539
RSRC2	65117	1	INTERNAL3	RSN_HUM:NM_023012,RSN_HUM:NR_036435,RSN_HUM:NR_036436;RSN_HUM:NR_036434,RSN_HUM:XM_005253601,RSN_HUM:XM_005253602,RSN_HUM:XM_005253604	0.440567	0.00270256	0.554959	0.00791792	0.00791792	0.114392
CD44	960	5	XCASSETTE	RSN_HUM:NM_001202556;RSN_HUM:NM_000610	0.22388	0.00399143	0.109511	0.0088165	0.0088165	0.114369
AKAP11	11215	1	CASSETTE	RSN_HUM:XM_005266248;RSN_HUM:XM_005266247,RSN_HUM:XM_005266249,RSN_HUM:XM_005266250,RSN_HUM:NM_016248	0.148761	0.00103051	0.0343949	0.00118041	0.00118041	0.114366
NRM	11270	2	CASSETTE	RSN_HUM:NM_001270709,RSN_HUM:NR_073072;RSN_HUM:NM_001270707	0.296007	0.00177107	0.181749	0.000721325	0.00177107	0.114258
SMARCA2	6595	2	CASSETTE	RSN_HUM:NM_001289397,RSN_HUM:NM_139045,RSN_HUM:NM_001289398,RSN_HUM:NM_001289399,RSN_HUM:NM_001289400;RSN_HUM:NM_003070,RSN_HUM:NM_001289396	0.889434	0.0035445	0.775293	0.00282879	0.0035445	0.114141
TMPO	7112	6	LCASSETTE	RSN_HUM:NM_001032284;RSN_HUM:XM_005269130	0.167425	0.00464148	0.0533684	0.00101558	0.00464148	0.114057
EPS15L1	58513	1	CASSETTE	RSN_HUM:NR_047665;RSN_HUM:NM_001258374	0.758676	0.00209198	0.872631	0.00199038	0.00209198	0.113955
EPS15L1	58513	4	CASSETTE	RSN_HUM:NM_001258375;RSN_HUM:NM_021235,RSN_HUM:NR_047666	0.758676	0.00209198	0.872631	0.00199038	0.00209198	0.113955
PPRC1	23082	2	LCASSETTE	RSN_HUM:NM_001288727;RSN_HUM:NM_001288728,RSN_HUM:NM_015062,RSN_HUM:XM_005269656	0.0688525	0.00190988	0.182645	0.00185441	0.00190988	0.113793
DDIT3	1649	15	INTERNAL3	RSN_HUM:NM_001195057;RSN_HUM:NM_004083	0.223076	0.0046585	0.336594	0.0501878	0.0501878	0.113518
VWA9	81556	11	CASSETTE	RSN_HUM:NR_045901;RSN_HUM:NR_045104,RSN_HUM:NR_045106	0.26956	0.0029422	0.156072	0.00168896	0.0029422	0.113488
RBM39	9584	2	CASSETTE	RSN_HUM:NM_001242599,RSN_HUM:NM_001242600;RSN_HUM:NM_004902,RSN_HUM:NM_184234,RSN_HUM:NR_040722,RSN_HUM:NR_040723,RSN_HUM:NR_040724	0.246117	0.0139072	0.359555	0.0146684	0.0146684	0.113438
VEGFA	7422	25	CASSETTE	RSN_HUM:NM_001025370,RSN_HUM:NM_001171628;RSN_HUM:NM_001204384,RSN_HUM:NM_001204385	0.930663	0.00259729	0.817285	0.00353194	0.00353194	0.113378
AKIP1	56672	2	CASSETTE	RSN_HUM:NM_001206647,RSN_HUM:NM_001206648;RSN_HUM:NM_001206646,RSN_HUM:NM_020642,RSN_HUM:NR_045417,RSN_HUM:NR_045418	0.152171	0.00358872	0.0390119	0.00159823	0.00358872	0.113159
MCM8	84515	2	MUT_EXCLU	RSN_HUM:NM_001281521;RSN_HUM:NM_032485,RSN_HUM:NM_001281520,RSN_HUM:XM_005260859	0.0440897	0.00196096	0.157174	0.000785213	0.00196096	0.113084
CYP20A1	57404	2	CASSETTE	RSN_HUM:XM_005246701,RSN_HUM:XM_005246700;RSN_HUM:NM_177538,RSN_HUM:XM_005246699,RSN_HUM:XM_005246698	0.132254	0.00171942	0.245117	0.00457107	0.00457107	0.112863
RTN3	10313	1	LCASSETTE	RSN_HUM:NM_001265591,RSN_HUM:NM_006054,RSN_HUM:NM_201430,RSN_HUM:NR_049750,RSN_HUM:NR_049751;RSN_HUM:NM_001265589	0.976097	0.00992216	0.863235	0.00857435	0.00992216	0.112862
MYNN	55892	11	INTERNAL3	RSN_HUM:XM_005247621,RSN_HUM:NM_001185118,RSN_HUM:NM_018657,RSN_HUM:NM_001185119;RSN_HUM:NR_033703	0.889358	0.0008767	0.776619	0.00113215	0.00113215	0.112739
KDM1A	23028	2	CASSETTE	RSN_HUM:NM_015013;RSN_HUM:XM_005245786,RSN_HUM:NM_001009999	0.797475	0.00967042	0.684762	0.0028258	0.00967042	0.112713
STK25	10494	5	CASSETTE	RSN_HUM:NM_001282307;RSN_HUM:NM_001271977	0.161494	0.00486396	0.274195	0.00399715	0.00486396	0.112701
ZNF106	64397	4	INTERNAL3	RSN_HUM:NM_001284306,RSN_HUM:NM_001284307,RSN_HUM:NM_022473,RSN_HUM:XM_005254591;RSN_HUM:XM_005254592	0.775082	0.0017762	0.662645	0.0008205	0.0017762	0.112437
PRCC	5546	1	CASSETTE	RSN_HUM:NM_005973;RSN_HUM:XM_005245313	0.988144	0.00304915	0.875713	0.00459945	0.00459945	0.112431
ZNHIT3	9326	4	CASSETTE	RSN_HUM:NR_104010,RSN_HUM:NR_104011;RSN_HUM:NM_001281432,RSN_HUM:NM_001281433,RSN_HUM:NM_004773	0.170078	0.00265702	0.0576613	0.00319972	0.00319972	0.112417
PKMYT1	9088	3	MUT_EXCLU	RSN_HUM:NM_001258451;RSN_HUM:NM_004203,RSN_HUM:NM_182687	0.0806933	0.00182413	0.193098	0.000205161	0.00182413	0.112405
DNAJC19	131118	4	INTERNAL5	RSN_HUM:NM_001190233,RSN_HUM:NM_145261,RSN_HUM:NR_033721;RSN_HUM:NR_033723	0.949604	0.0033951	0.837395	0.000678332	0.0033951	0.112209
PPP2R5C	5527	22	CASSETTE	RSN_HUM:NM_001161726,RSN_HUM:NM_178586;RSN_HUM:NM_001161725,RSN_HUM:NM_002719	0.601085	0.00316611	0.488906	0.0040834	0.0040834	0.112179
PPP2R5C	5527	3	CASSETTE	RSN_HUM:XM_005267823;RSN_HUM:XM_005267827,RSN_HUM:XM_005267819,RSN_HUM:XM_005267820,RSN_HUM:XM_005267826	0.601085	0.00316611	0.488906	0.0040834	0.0040834	0.112179
GABPB1	2553	4	CASSETTE	RSN_HUM:NM_005254,RSN_HUM:NM_016654,RSN_HUM:NM_002041,RSN_HUM:NM_016655;RSN_HUM:NM_181427	0.839471	0.00142155	0.727339	0.00285548	0.00285548	0.112132
SAT1	6303	1	CASSETTE	RSN_HUM:NM_002970;RSN_HUM:NR_027783	0.952199	0.00867037	0.840097	0.0493788	0.0493788	0.112102
FKBP14	55033	1	CASSETTE	RSN_HUM:NM_017946;RSN_HUM:NR_046478	0.99043	0.0032289	0.878354	0.00237	0.0032289	0.112076
RWDD1	51389	2	CASSETTE	RSN_HUM:NM_001007464;RSN_HUM:NM_016104	0.89811	0.00210642	0.786062	0.00247131	0.00247131	0.112048
RTEL1	51750	2	INTERNAL5	RSN_HUM:NM_001283010,RSN_HUM:NM_016434,RSN_HUM:NM_032957;RSN_HUM:NM_001283009	0.548942	0.0010165	0.66094	0.0009081	0.0010165	0.111998
CPNE1	8904	11	CASSETTE	RSN_HUM:NM_152925;RSN_HUM:NM_152927	0.779765	0.00321712	0.891733	0.00217217	0.00321712	0.111968
PDS5B	23047	3	CASSETTE	RSN_HUM:XM_005266297;RSN_HUM:NM_015032,RSN_HUM:XM_005266296	0.11965	0.00117343	0.231555	0.00074885	0.00117343	0.111905
HNRNPK	3190	3	CASSETTE	RSN_HUM:XM_005251966,RSN_HUM:XM_005251964,RSN_HUM:XM_005251965,RSN_HUM:XM_005251963;RSN_HUM:NM_031262,RSN_HUM:XM_005251961,RSN_HUM:NM_002140,RSN_HUM:NM_031263,RSN_HUM:XM_005251960	0.154967	0.0423027	0.0430795	0.0580276	0.0580276	0.111888
HIRIP3	8479	1	CASSETTE	RSN_HUM:NM_001197323;RSN_HUM:NM_003609	0.247973	0.00183649	0.359823	0.000828186	0.00183649	0.11185
YPEL5	51646	3	CASSETTE	RSN_HUM:NM_016061;RSN_HUM:NM_001127399	0.959492	0.00524132	0.847773	0.00375667	0.00524132	0.111719
USP48	84196	1	CASSETTE	RSN_HUM:XM_005246009,RSN_HUM:XM_005246010;RSN_HUM:NM_032236	0.252391	0.0045164	0.364058	0.00192332	0.0045164	0.111667
UBE2D3	7323	6	CASSETTE	RSN_HUM:NM_003340,RSN_HUM:NM_181886,RSN_HUM:NM_181887,RSN_HUM:NM_181888,RSN_HUM:NM_181889,RSN_HUM:NM_181890,RSN_HUM:NM_181891,RSN_HUM:NM_181893;RSN_HUM:NM_181892	0.985138	0.0183395	0.873504	0.0137893	0.0183395	0.111634
CDK5RAP2	55755	3	INTERNAL3	RSN_HUM:NM_001011649,RSN_HUM:NM_018249,RSN_HUM:NR_073555,RSN_HUM:NR_073556,RSN_HUM:NR_073557,RSN_HUM:NR_073558;RSN_HUM:NM_001272039,RSN_HUM:NR_073554	0.808742	0.00104989	0.920295	0.000385169	0.00104989	0.111553
GGA1	26088	9	LCASSETTE	RSN_HUM:NM_001001560;RSN_HUM:XM_005261522	0.218733	0.00109997	0.107192	0.000657698	0.00109997	0.111541
RNF138	51444	1	LCASSETTE	RSN_HUM:XM_005258286;RSN_HUM:NM_016271	0.166724	0.00102805	0.0551872	0.00177215	0.00177215	0.111537
RNF138	51444	6	LCASSETTE	RSN_HUM:NM_198128;RSN_HUM:NM_001191324	0.166724	0.00102805	0.0551872	0.00177215	0.00177215	0.111537
CD44	960	48	XCASSETTE	RSN_HUM:NM_001202556;RSN_HUM:XM_005253232	0.225569	0.00396154	0.114057	0.0084651	0.0084651	0.111512
PDLIM5	10611	4	CASSETTE	RSN_HUM:NM_001256425;RSN_HUM:NM_001011513,RSN_HUM:XM_005262696	0.839444	0.00574964	0.950934	0.00635632	0.00635632	0.11149
FGGY	55277	1	CASSETTE	RSN_HUM:NM_018291,RSN_HUM:NR_103473,RSN_HUM:NM_001244714,RSN_HUM:NM_001278224;RSN_HUM:NM_001113411	0.94893	0.0010192	0.837591	0.000485502	0.0010192	0.111339
KIAA1217	56243	6	XCASSETTE	RSN_HUM:NM_001098500,RSN_HUM:XM_005252520,RSN_HUM:XM_005252522;RSN_HUM:NM_019590,RSN_HUM:XM_005252502,RSN_HUM:XM_005252505,RSN_HUM:XM_005252508	0.928229	0.00583515	0.816898	0.0177127	0.0177127	0.111331
GMPR2	51292	7	CASSETTE	RSN_HUM:NM_001283023;RSN_HUM:NM_001002001,RSN_HUM:NM_001002000,RSN_HUM:XM_005267740,RSN_HUM:XM_005267741,RSN_HUM:NM_001002002,RSN_HUM:XM_005267742,RSN_HUM:NM_001283022,RSN_HUM:NM_016576	0.37836	0.00469288	0.489678	0.00134333	0.00469288	0.111318
TBX5	6910	1	CASSETTE	RSN_HUM:NM_080717;RSN_HUM:NM_000192	0.752895	0.00232091	0.641632	0.000152424	0.00232091	0.111263
FAM207A	85395	5	CASSETTE	RSN_HUM:XM_005261193,RSN_HUM:XM_005261192;RSN_HUM:XM_005261191,RSN_HUM:XM_005261189	0.235411	0.00148506	0.124201	0.00091787	0.00148506	0.11121
RAD51C	5889	2	CASSETTE	RSN_HUM:NR_103872;RSN_HUM:NM_058216	0.298461	0.00190377	0.187368	0.00315422	0.00315422	0.111093
SSFA2	6744	1	CASSETTE	RSN_HUM:NM_001287503,RSN_HUM:NM_001287504;RSN_HUM:NM_001130445,RSN_HUM:NM_006751,RSN_HUM:NR_109843	0.13914	0.00343682	0.0281535	0.0044577	0.0044577	0.110987
TMEM218	219854	10	INTERNAL3	RSN_HUM:NM_001080546;RSN_HUM:NR_047590	0.873307	0.00143634	0.98427	0.0003433	0.00143634	0.110963
TMEM218	219854	18	INTERNAL3	RSN_HUM:NM_001258238,RSN_HUM:NM_001258239,RSN_HUM:NM_001258240,RSN_HUM:NM_001258241,RSN_HUM:NM_001258242,RSN_HUM:NM_001258243,RSN_HUM:NM_001258244,RSN_HUM:NM_001258245,RSN_HUM:NM_001258246;RSN_HUM:NR_047586,RSN_HUM:NR_047588,RSN_HUM:NR_047592	0.873307	0.00143634	0.98427	0.0003433	0.00143634	0.110963
RPE	6120	5	CASSETTE	RSN_HUM:NM_001278286,RSN_HUM:NM_001278282,RSN_HUM:NM_001278283,RSN_HUM:NM_001278288,RSN_HUM:NM_006916,RSN_HUM:NM_199229;RSN_HUM:NM_001278289	0.957437	0.00446749	0.846484	0.000815222	0.00446749	0.110953
RPS6KC1	26750	7	CASSETTE	RSN_HUM:NM_001287218,RSN_HUM:NM_001287220,RSN_HUM:NM_012424;RSN_HUM:NM_001287219	0.945262	0.00195935	0.83445	0.00066566	0.00195935	0.110812
SEC31A	22872	5	LCASSETTE	RSN_HUM:NM_016211,RSN_HUM:XM_005262851,RSN_HUM:XM_005262852,RSN_HUM:XM_005262854;RSN_HUM:NM_001077206,RSN_HUM:NM_001077207,RSN_HUM:NM_001077208,RSN_HUM:NM_001191049,RSN_HUM:NM_014933,RSN_HUM:XM_005262847,RSN_HUM:XM_005262849,RSN_HUM:XM_005262850	0.205423	0.0203453	0.0947183	0.0190312	0.0203453	0.110705
LRCH3	84859	2	CASSETTE	RSN_HUM:XM_005269365,RSN_HUM:XM_005269367;RSN_HUM:XM_005269362,RSN_HUM:XM_005269363,RSN_HUM:NM_032773	0.829929	0.00889788	0.719225	0.00220942	0.00889788	0.110704
TANGO2	128989	2	LCASSETTE	RSN_HUM:NM_001283179,RSN_HUM:NM_001283186,RSN_HUM:XM_005261222,RSN_HUM:XM_005261223;RSN_HUM:NM_001283106,RSN_HUM:NM_001283116,RSN_HUM:NM_001283129,RSN_HUM:NM_152906	0.31375	0.00124964	0.203063	0.00148833	0.00148833	0.110687
TMEM254	80195	2	LCASSETTE	RSN_HUM:NM_001270371,RSN_HUM:NM_025125,RSN_HUM:NM_001270367,RSN_HUM:NR_072984,RSN_HUM:NR_072985,RSN_HUM:NR_072986,RSN_HUM:NM_001270374;RSN_HUM:NM_001270370	0.81156	0.00129602	0.700918	0.00108866	0.00129602	0.110642
MR1	3140	5	CASSETTE	RSN_HUM:NM_001195035;RSN_HUM:NM_001195000	0.139998	0.00256218	0.250631	0.00105334	0.00256218	0.110633
RB1CC1	9821	1	INTERNAL5	RSN_HUM:NM_001083617;RSN_HUM:NM_014781	0.516357	0.0019349	0.405775	0.0027498	0.0027498	0.110582
TRA2A	29896	3	CASSETTE	RSN_HUM:NM_001282757;RSN_HUM:NM_001282759	0.970234	0.0034805	0.859777	0.00686515	0.00686515	0.110457
TRPC4AP	26133	1	INTERNAL3	RSN_HUM:NM_015638;RSN_HUM:NM_199368	0.724939	0.0054388	0.614806	0.0007578	0.0054388	0.110133
AKR1A1	10327	1	CASSETTE	RSN_HUM:NM_001202413;RSN_HUM:NM_001202414	0.693741	0.00590319	0.583686	0.00430591	0.00590319	0.110055
AKR1A1	10327	3	CASSETTE	RSN_HUM:NM_153326;RSN_HUM:NM_006066	0.693741	0.00590319	0.583686	0.00430591	0.00590319	0.110055
SRRM1	10250	3	INTERNAL5	RSN_HUM:NM_005839,RSN_HUM:XM_005245717,RSN_HUM:XM_005245718,RSN_HUM:XM_005245722;RSN_HUM:XM_005245719,RSN_HUM:XM_005245720,RSN_HUM:XM_005245721	0.798236	0.00292916	0.688225	0.00122628	0.00292916	0.110011
SNX17	9784	16	MUT_M_EXCLU	RSN_HUM:NM_001267060;RSN_HUM:NR_049786	0.700421	0.00745853	0.590453	0.00667347	0.00745853	0.109968
MEG3	55384	41	INTERNAL5	RSN_HUM:NR_033360,RSN_HUM:NR_046470;RSN_HUM:NR_046472	0.767699	0.0006328	0.877666	0.00171825	0.00171825	0.109967
RPRD2	23248	1	CASSETTE	RSN_HUM:XM_005245031,RSN_HUM:XM_005245032;RSN_HUM:XM_005245033,RSN_HUM:NM_015203	0.623736	0.00356332	0.513802	0.000797	0.00356332	0.109934
KIF13A	63971	9	CASSETTE	RSN_HUM:NM_001105566,RSN_HUM:NM_001105567,RSN_HUM:XM_005249293;RSN_HUM:XM_005249292	1	0.0030967	0.890077	0.00153335	0.0030967	0.109923
BBIP1	92482	1	CASSETTE	RSN_HUM:NM_001195305,RSN_HUM:NM_001195306;RSN_HUM:NM_001195304	0.957066	0.00232194	0.847195	0.00198272	0.00232194	0.109871
HNRNPH3	3189	1	INTERNAL5	RSN_HUM:NM_012207;RSN_HUM:NM_021644	0.79728	0.0153727	0.907006	0.0416014	0.0416014	0.109726
ZC3HC1	51530	2	CASSETTE	RSN_HUM:NM_001282191,RSN_HUM:NM_016478;RSN_HUM:NM_001282190	0.99598	0.0011692	0.886397	0.00044585	0.0011692	0.109583
SUN1	23353	6	CASSETTE	RSN_HUM:NM_025154;RSN_HUM:NM_001171944	0.197109	0.00245447	0.306562	0.00224131	0.00245447	0.109453
LDB2	9079	11	MUT_EXCLU	RSN_HUM:XM_005248197;RSN_HUM:XM_005248198	0.390851	0.00136143	0.281406	0.000241796	0.00136143	0.109445
STPG1	90529	3	CASSETTE	RSN_HUM:NM_178122,RSN_HUM:XM_005246027;RSN_HUM:NM_001199012,RSN_HUM:NM_001199013	0.189673	0.00092712	0.0802572	0.00227394	0.00227394	0.109416
RTN3	10313	7	CASSETTE	RSN_HUM:NM_001265591,RSN_HUM:NM_006054,RSN_HUM:NM_201430,RSN_HUM:NR_049750,RSN_HUM:NR_049751;RSN_HUM:NM_001265590	0.974985	0.00993348	0.865593	0.008551	0.00993348	0.109392
POC1A	25886	1	CASSETTE	RSN_HUM:NM_001161580;RSN_HUM:NM_001161581,RSN_HUM:NM_015426,RSN_HUM:XM_005265019	0.237906	0.00263465	0.347274	0.00113657	0.00263465	0.109368
PLEKHA5	54477	15	XCASSETTE	RSN_HUM:NM_019012,RSN_HUM:XM_005253400;RSN_HUM:NM_001256470	0.998644	0.00101968	0.889337	0.000318215	0.00101968	0.109307
COL6A3	1293	1	CASSETTE	RSN_HUM:NM_057166,RSN_HUM:XM_005246065;RSN_HUM:NM_004369,RSN_HUM:NM_057167,RSN_HUM:XM_005246066,RSN_HUM:NM_057164,RSN_HUM:NM_057165	0.27875	0.0522854	0.388053	0.0690434	0.0690434	0.109303
IKZF5	64376	3	INTERNAL3	RSN_HUM:NM_001271840,RSN_HUM:NR_073475;RSN_HUM:NR_073477	0.859711	0.000632268	0.968965	0.00198487	0.00198487	0.109254
ABLIM3	22885	4	CASSETTE	RSN_HUM:XM_005268393,RSN_HUM:XM_005268396;RSN_HUM:XM_005268392,RSN_HUM:XM_005268395	0.430929	0.00215362	0.321695	0.0017327	0.00215362	0.109234
MAP4K4	9448	1	CASSETTE	RSN_HUM:NM_004834,RSN_HUM:XM_005264065,RSN_HUM:XM_005264066,RSN_HUM:XM_005264068;RSN_HUM:NM_001242560,RSN_HUM:XM_005264061	0.925594	0.0077023	0.816523	0.00797396	0.00797396	0.109071
MAP4K4	9448	25	CASSETTE	RSN_HUM:XM_005264062,RSN_HUM:XM_005264063,RSN_HUM:XM_005264064,RSN_HUM:XM_005264071;RSN_HUM:XM_005264050,RSN_HUM:XM_005264052	0.925594	0.0077023	0.816523	0.00797396	0.00797396	0.109071
MDM2	4193	7	XCASSETTE	RSN_HUM:NM_001145340,RSN_HUM:NM_001278462;RSN_HUM:NM_002392,RSN_HUM:XM_005268872	0.367135	0.00535348	0.258069	0.0314487	0.0314487	0.109066
PTAR1	375743	9	MUT_EXCLU	RSN_HUM:XM_005251979;RSN_HUM:XM_005251981	0.884698	0.00089236	0.775694	0.00118247	0.00118247	0.109004
CEP57L1	285753	2	INTERNAL5	RSN_HUM:XM_005266937,RSN_HUM:XM_005266935;RSN_HUM:XM_005266938,RSN_HUM:NM_001083535,RSN_HUM:NM_001271852,RSN_HUM:NM_001271853,RSN_HUM:NM_173830	0.0944484	0.00123136	0.203428	0.0001342	0.00123136	0.10898
WBP5	51186	5	CASSETTE	RSN_HUM:NM_001006613;RSN_HUM:NM_016303	0.268427	0.0133377	0.159508	0.0106891	0.0133377	0.108919
RNF41	10193	2	CASSETTE	RSN_HUM:NM_001242826,RSN_HUM:NM_005785,RSN_HUM:NM_194359;RSN_HUM:NM_194358,RSN_HUM:NR_040053,RSN_HUM:XM_005268561	0.933067	0.00367076	0.824211	0.00459567	0.00459567	0.108856
LMO7	4008	9	CASSETTE	RSN_HUM:XM_005266397;RSN_HUM:NM_005358,RSN_HUM:XM_005266396	0.0250751	0.0054596	0.133807	0.00162622	0.0054596	0.108732
DCUN1D4	23142	3	CASSETTE	RSN_HUM:NM_015115,RSN_HUM:XM_005265731;RSN_HUM:XM_005265732,RSN_HUM:NM_001040402,RSN_HUM:NM_001287757,RSN_HUM:NM_001287755,RSN_HUM:XM_005265733	0.332698	0.00182388	0.224202	0.00189874	0.00189874	0.108496
RTN3	10313	10	CASSETTE	RSN_HUM:NM_001265591,RSN_HUM:NM_006054,RSN_HUM:NM_201430,RSN_HUM:NR_049750,RSN_HUM:NR_049751;RSN_HUM:NM_201428	0.97536	0.00992967	0.866911	0.00853799	0.00992967	0.108449
POLD3	10714	1	CASSETTE	RSN_HUM:NR_046409;RSN_HUM:NM_006591,RSN_HUM:NR_046410	0.938071	0.0173182	0.829696	0.00081801	0.0173182	0.108375
ZNF346	23567	4	CASSETTE	RSN_HUM:XM_005265865,RSN_HUM:XM_005265864;RSN_HUM:NM_012279	0.431365	0.00111054	0.539557	0.000127883	0.00111054	0.108192
ARL6IP4	51329	5	INTERNAL5	RSN_HUM:NM_001002251;RSN_HUM:NM_001002252,RSN_HUM:NM_016638	0.459307	0.0106475	0.351262	0.00964963	0.0106475	0.108045
RBM26	64062	11	INTERNAL3	RSN_HUM:XM_005266493;RSN_HUM:XM_005266496,RSN_HUM:XM_005266501,RSN_HUM:NM_001286632,RSN_HUM:NM_022118	0.163712	0.00159414	0.0556709	0.000506548	0.00159414	0.108041
RBM26	64062	5	INTERNAL3	RSN_HUM:XM_005266497,RSN_HUM:XM_005266491,RSN_HUM:XM_005266492,RSN_HUM:XM_005266498,RSN_HUM:XM_005266499;RSN_HUM:XM_005266494,RSN_HUM:NM_001286631	0.163712	0.00159414	0.0556709	0.000506548	0.00159414	0.108041
SETD5	55209	5	INTERNAL3	RSN_HUM:XM_005265299,RSN_HUM:XM_005265301;RSN_HUM:XM_005265307,RSN_HUM:NM_001080517	0.395995	0.00143045	0.503967	0.00114388	0.00143045	0.107972
ARAP1	116985	2	CASSETTE	RSN_HUM:NM_001135190;RSN_HUM:NM_001040118,RSN_HUM:NM_015242	0.941112	0.00330885	0.83317	0.0022436	0.00330885	0.107942
DLG4	1742	2	INTERNAL3	RSN_HUM:NM_001128827,RSN_HUM:XM_005256489,RSN_HUM:XM_005256491,RSN_HUM:XM_005256494;RSN_HUM:NM_001365,RSN_HUM:XM_005256492,RSN_HUM:XM_005256493	0.272905	0.0012781	0.380837	0.000899925	0.0012781	0.107932
KIAA1217	56243	8	XCASSETTE	RSN_HUM:NM_001098500,RSN_HUM:XM_005252520,RSN_HUM:XM_005252522;RSN_HUM:XM_005252500,RSN_HUM:XM_005252501,RSN_HUM:XM_005252503,RSN_HUM:XM_005252504,RSN_HUM:XM_005252507,RSN_HUM:XM_005252512,RSN_HUM:XM_005252513,RSN_HUM:XM_005252509,RSN_HUM:XM_005252514,RSN_HUM:XM_005252515	0.931258	0.00581618	0.823338	0.0175741	0.0175741	0.10792
SKIL	6498	3	INTERNAL5	RSN_HUM:NM_001145098,RSN_HUM:NM_005414,RSN_HUM:XM_005247721,RSN_HUM:NM_001248008;RSN_HUM:NM_001145097	0.980495	0.000969	0.872613	0.0013981	0.0013981	0.107882
RPAIN	84268	24	MUT_EXCLU	RSN_HUM:NM_001160266;RSN_HUM:NR_027685	0.50452	0.00102226	0.612313	0.00147552	0.00147552	0.107793
MBD1	4152	29	MUT_EXCLU	RSN_HUM:NM_001204143,RSN_HUM:NM_002384,RSN_HUM:NM_015844,RSN_HUM:NM_001204140,RSN_HUM:XM_005258272,RSN_HUM:XM_005258274;RSN_HUM:NM_015845,RSN_HUM:NM_001204151	0.659175	0.00213877	0.551391	0.0030909	0.0030909	0.107784
MRPL42	28977	3	CASSETTE	RSN_HUM:NM_014050;RSN_HUM:NR_038160	0.979521	0.00304373	0.87183	0.00174501	0.00304373	0.107691
MRPL42	28977	5	CASSETTE	RSN_HUM:NM_172177;RSN_HUM:NR_038159	0.979521	0.00304373	0.87183	0.00174501	0.00304373	0.107691
TRIM39	56658	2	CASSETTE	RSN_HUM:NM_172016;RSN_HUM:NM_021253	0.987478	0.0005191	0.879873	0.00168405	0.00168405	0.107605
IRAK4	51135	1	CASSETTE	RSN_HUM:NM_001145256,RSN_HUM:NM_001145257,RSN_HUM:XM_005268949;RSN_HUM:NM_001114182,RSN_HUM:NM_016123,RSN_HUM:XM_005268943,RSN_HUM:XM_005268945,RSN_HUM:XM_005268944,RSN_HUM:XM_005268946	0.452718	0.001014	0.560171	0.000564598	0.001014	0.107453
PPP2R3C	55012	2	CASSETTE	RSN_HUM:XM_005267784;RSN_HUM:XM_005267782	0.197169	0.00198485	0.3046	0.000956994	0.00198485	0.107431
TFDP1	7027	2	INTERNAL5	RSN_HUM:NR_026580,RSN_HUM:XM_005268331,RSN_HUM:XM_005268328;RSN_HUM:XM_005268327,RSN_HUM:NM_007111,RSN_HUM:XM_005268326	0.273892	0.0123202	0.381257	0.00811788	0.0123202	0.107365
ORAI2	80228	3	CASSETTE	RSN_HUM:NM_032831;RSN_HUM:NM_001126340	0.148717	0.00215375	0.0413568	0.0012235	0.00215375	0.10736
SNX17	9784	25	XCASSETTE	RSN_HUM:NR_049787,RSN_HUM:NR_049788;RSN_HUM:NR_049783	0.173984	0.00184557	0.0666862	0.00251926	0.00251926	0.107298
WIZ	58525	10	CASSETTE	RSN_HUM:XM_005260006,RSN_HUM:XM_005260007,RSN_HUM:XM_005260011,RSN_HUM:XM_005260012;RSN_HUM:XM_005260004,RSN_HUM:XM_005260005,RSN_HUM:XM_005260008,RSN_HUM:XM_005260009,RSN_HUM:XM_005260010	0.357591	0.00253362	0.464825	0.00214081	0.00253362	0.107234
ARNT	405	4	CASSETTE	RSN_HUM:NM_001197325,RSN_HUM:NM_001286036,RSN_HUM:NM_001668,RSN_HUM:NM_178427;RSN_HUM:NM_001286035	0.982068	0.00111532	0.874884	0.00103783	0.00111532	0.107184
ARFGAP2	84364	1	CASSETTE	RSN_HUM:NM_001242832;RSN_HUM:NM_032389,RSN_HUM:XM_005253168	0.0175891	0.00234804	0.124738	0.00137328	0.00234804	0.107149
MLPH	79083	3	CASSETTE	RSN_HUM:NM_001281473;RSN_HUM:NM_001281474,RSN_HUM:NM_001042467,RSN_HUM:NM_024101,RSN_HUM:NR_104019	0.783944	0.0038132	0.891065	0.000597114	0.0038132	0.107121
FNBP1	23048	34	MUT_EXCLU	RSN_HUM:XM_005251827,RSN_HUM:XM_005251828;RSN_HUM:XM_005251831	0.74255	0.00186845	0.63543	0.000765125	0.00186845	0.10712
BCL2L11	10018	48	MUT_EXCLU	RSN_HUM:NM_001204109;RSN_HUM:NM_138621	0.0692853	3.31961e-05	0.176312	0.00148795	0.00148795	0.107027
BCL2L11	10018	78	MUT_EXCLU	RSN_HUM:NM_001204112;RSN_HUM:NM_006538	0.0692853	3.31961e-05	0.176312	0.00148795	0.00148795	0.107027
ENTHD2	146705	2	CASSETTE	RSN_HUM:NM_144679;RSN_HUM:XM_005257066,RSN_HUM:XM_005257067	0.809471	0.00230435	0.702611	0.00284581	0.00284581	0.10686
SEC24B	10427	3	INTERNAL3	RSN_HUM:NM_001042734,RSN_HUM:NM_006323,RSN_HUM:XM_005262688;RSN_HUM:XM_005262689,RSN_HUM:XM_005262691	0.710583	0.0017321	0.603756	0.0035866	0.0035866	0.106827
CSF1	1435	4	CASSETTE	RSN_HUM:NM_172211;RSN_HUM:NM_172210	0.0892275	0.00281864	0.196054	0.00226213	0.00281864	0.106827
ARHGEF9	23229	5	CASSETTE	RSN_HUM:NM_001173479;RSN_HUM:XM_005262249,RSN_HUM:XM_005262253	0.680694	0.00103101	0.787457	0.00114254	0.00114254	0.106763
AP5M1	55745	1	CASSETTE	RSN_HUM:NR_026895;RSN_HUM:NM_018229	0.0309644	0.00176332	0.137703	0.00053884	0.00176332	0.106739
WARS	7453	5	CASSETTE	RSN_HUM:NM_213645;RSN_HUM:NM_173701	0.371513	0.0121797	0.264826	0.0107538	0.0121797	0.106687
VRK2	7444	22	CASSETTE	RSN_HUM:NM_001288839;RSN_HUM:XM_005264541	0.248059	0.00108281	0.141413	0.00038787	0.00108281	0.106646
SZRD1	26099	10	LCASSETTE	RSN_HUM:NR_073502;RSN_HUM:NR_073501	0.818168	0.00472116	0.711535	0.00442241	0.00472116	0.106633
NUMA1	4926	1	CASSETTE	RSN_HUM:NM_001286561;RSN_HUM:NM_006185	0.177759	0.00753492	0.0711408	0.00301796	0.00753492	0.106618
UROD	7389	1	INTERNAL3	RSN_HUM:NM_000374;RSN_HUM:NR_036510	0.802846	0.0030986	0.696264	0.0013757	0.0030986	0.106582
TLK2	11011	1	LCASSETTE	RSN_HUM:XM_005256974,RSN_HUM:XM_005256973,RSN_HUM:XM_005256975;RSN_HUM:XM_005256970,RSN_HUM:XM_005256969,RSN_HUM:NM_001284333,RSN_HUM:NM_006852	0.111582	0.00138194	0.00503715	0.00182643	0.00182643	0.106545
NCOR2	9612	3	CASSETTE	RSN_HUM:NM_001077261,RSN_HUM:NM_001206654;RSN_HUM:NM_006312	0.645905	0.0043573	0.539449	0.00392845	0.0043573	0.106456
BCL2L13	23786	17	LCASSETTE	RSN_HUM:NM_001270735;RSN_HUM:NM_001270727	0.250985	0.00212682	0.357313	0.00362623	0.00362623	0.106328
CTIF	9811	3	CASSETTE	RSN_HUM:NM_001142397,RSN_HUM:NM_014772;RSN_HUM:XM_005258392	0.983447	0.00256443	0.877138	0.00156363	0.00256443	0.106309
PHF20L1	51105	4	CASSETTE	RSN_HUM:NM_001277196,RSN_HUM:NM_198513,RSN_HUM:XM_005250935,RSN_HUM:XM_005250936,RSN_HUM:XM_005250937;RSN_HUM:XM_005250930,RSN_HUM:XM_005250931,RSN_HUM:XM_005250932,RSN_HUM:XM_005250938,RSN_HUM:XM_005250942	0.941295	0.00202848	0.834998	0.00215201	0.00215201	0.106297
ERBB2IP	55914	7	LCASSETTE	RSN_HUM:NM_001006600;RSN_HUM:XM_005248556	0.995776	0.00388591	0.889555	0.000693605	0.00388591	0.106221
ACADM	34	5	CASSETTE	RSN_HUM:NM_001286042,RSN_HUM:NM_001286044;RSN_HUM:NM_001127328	0.205897	0.00145437	0.0997374	0.00089485	0.00145437	0.10616
BCL2L13	23786	36	LCASSETTE	RSN_HUM:NM_001270735;RSN_HUM:NM_001270731	0.248116	0.00215141	0.354261	0.00365747	0.00365747	0.106145
ANXA11	311	4	CASSETTE	RSN_HUM:NM_001157;RSN_HUM:NM_001278409,RSN_HUM:NM_145868	0.613592	0.0164215	0.507544	0.00730558	0.0164215	0.106048
THAP5	168451	2	CASSETTE	RSN_HUM:NM_001287601;RSN_HUM:NM_001130475	0.223758	0.000933152	0.117715	0.00290787	0.00290787	0.106043
CLTC	1213	3	CASSETTE	RSN_HUM:NM_001288653,RSN_HUM:NM_004859;RSN_HUM:XM_005257012	0.952335	0.0167776	0.846328	0.0140212	0.0167776	0.106007
INTS3	65123	2	CASSETTE	RSN_HUM:XM_005245459,RSN_HUM:NM_023015;RSN_HUM:XM_005245461	0.981278	0.00273075	0.875369	0.0005416	0.00273075	0.105909
CFL2	1073	6	INTERNAL5	RSN_HUM:NR_028130;RSN_HUM:NR_028131	0.653121	0.0026159	0.547319	0.0028086	0.0028086	0.105802
RNGTT	8732	2	CASSETTE	RSN_HUM:NM_001286426,RSN_HUM:NM_001286428;RSN_HUM:NM_003800	0.543385	0.00173928	0.649157	0.00038835	0.00173928	0.105772
TLE1	7088	1	CASSETTE	RSN_HUM:NM_005077,RSN_HUM:XM_005252155,RSN_HUM:XM_005252163;RSN_HUM:XM_005252151,RSN_HUM:XM_005252153,RSN_HUM:XM_005252154,RSN_HUM:XM_005252162	0.999425	0.0072996	0.893677	0.00562642	0.0072996	0.105748
AZIN1	51582	1	CASSETTE	RSN_HUM:NM_148174,RSN_HUM:XM_005250969;RSN_HUM:NM_015878	0.734495	0.00814889	0.628764	0.0291862	0.0291862	0.105731
VWA9	81556	4	CASSETTE	RSN_HUM:NM_001207059;RSN_HUM:NR_045104	0.344687	0.0024985	0.239009	0.00138739	0.0024985	0.105678
MEG3	55384	25	MUT_M_EXCLU	RSN_HUM:NR_033358,RSN_HUM:NR_046468;RSN_HUM:NR_046464	0.504921	0.00151493	0.610543	0.00218478	0.00218478	0.105622
C11orf54	28970	7	CASSETTE	RSN_HUM:NM_001286070;RSN_HUM:NM_001286069,RSN_HUM:NM_001286071,RSN_HUM:NM_014039	0.085431	0.00120565	0.191025	0.000470618	0.00120565	0.105594
AFTPH	54812	2	CASSETTE	RSN_HUM:NM_001002243,RSN_HUM:NM_017657;RSN_HUM:NM_203437,RSN_HUM:XM_005264380	0.952146	0.00151815	0.846678	0.00308665	0.00308665	0.105468
SLC25A17	10478	17	LCASSETTE	RSN_HUM:NR_104238;RSN_HUM:NR_104236	0.118833	0.00109313	0.224134	0.000170434	0.00109313	0.105301
ATP13A2	23400	3	INTERNAL5	RSN_HUM:NM_001141973,RSN_HUM:NM_001141974,RSN_HUM:XM_005245811;RSN_HUM:NM_022089,RSN_HUM:XM_005245809,RSN_HUM:XM_005245812,RSN_HUM:XM_005245813,RSN_HUM:XM_005245815	0.610255	0.00156492	0.505021	0.000694575	0.00156492	0.105234
ADPGK	83440	3	LCASSETTE	RSN_HUM:NR_023319;RSN_HUM:NM_031284	0.416826	0.00611718	0.311695	0.00652785	0.00652785	0.105131
RNF13	11342	2	INTERNAL5	RSN_HUM:NM_007282,RSN_HUM:NM_183381;RSN_HUM:XM_005247092	0.91511	0.00227705	0.809988	0.00213355	0.00227705	0.105122
C2orf76	130355	3	CASSETTE	RSN_HUM:XM_005263594;RSN_HUM:XM_005263595,RSN_HUM:NM_001017927	0.178918	0.00108653	0.283938	0.00278477	0.00278477	0.10502
THADA	63892	2	LCASSETTE	RSN_HUM:NR_073394;RSN_HUM:NM_001083953,RSN_HUM:NM_022065	0.751933	0.00356722	0.856944	0.0017195	0.00356722	0.105011
KIAA0586	9786	2	CASSETTE	RSN_HUM:NM_001244190,RSN_HUM:NM_001244191,RSN_HUM:NM_014749;RSN_HUM:NM_001244189,RSN_HUM:NM_001244192	0.972474	0.00124427	0.867465	0.00050515	0.00124427	0.105009
RBM23	55147	1	CASSETTE	RSN_HUM:NM_001077352,RSN_HUM:XM_005267797,RSN_HUM:XM_005267798,RSN_HUM:XM_005267800,RSN_HUM:XM_005267801;RSN_HUM:NM_001077351,RSN_HUM:NM_018107,RSN_HUM:XM_005267803,RSN_HUM:XM_005267799,RSN_HUM:XM_005267802	0.437775	0.00411622	0.332984	0.00203427	0.00411622	0.104791
ODF2	4957	18	INTERNAL5	RSN_HUM:XM_005252020,RSN_HUM:NM_001242352,RSN_HUM:XM_005252018,RSN_HUM:XM_005252017,RSN_HUM:XM_005252019;RSN_HUM:XM_005252027,RSN_HUM:XM_005252026	0.864243	0.00241801	0.759476	0.00162559	0.00241801	0.104767
ODF2	4957	2	INTERNAL5	RSN_HUM:NM_153436,RSN_HUM:XM_005252016,RSN_HUM:NM_001242353,RSN_HUM:NM_153432,RSN_HUM:XM_005252010,RSN_HUM:XM_005252013,RSN_HUM:NM_153433,RSN_HUM:XM_005252014,RSN_HUM:XM_005252015,RSN_HUM:XM_005252012;RSN_HUM:XM_005252025,RSN_HUM:NM_153439,RSN_HUM:XM_005252011,RSN_HUM:XM_005252023,RSN_HUM:NM_153440,RSN_HUM:XM_005252024,RSN_HUM:NM_153437,RSN_HUM:XM_005252022,RSN_HUM:XM_005252029	0.864243	0.00241801	0.759476	0.00162559	0.00241801	0.104767
KIRREL	55243	3	INTERNAL3	RSN_HUM:NM_001286349,RSN_HUM:NM_018240;RSN_HUM:XM_005245305,RSN_HUM:XM_005245306	0.5985	0.0046655	0.493736	0.0059544	0.0059544	0.104764
ATG12	9140	6	CASSETTE	RSN_HUM:NM_004707;RSN_HUM:NR_033363	0.973929	0.00508895	0.869273	0.00495803	0.00508895	0.104656
RAD17	5884	6	CASSETTE	RSN_HUM:NM_133340;RSN_HUM:NM_133343,RSN_HUM:NM_133342,RSN_HUM:NM_001278622	0.535373	0.00191408	0.430812	0.00171989	0.00191408	0.104561
ACSL3	2181	1	CASSETTE	RSN_HUM:NM_203372;RSN_HUM:NM_004457	0.493845	0.00311515	0.389304	0.00469684	0.00469684	0.104541
UBR3	130507	1	CASSETTE	RSN_HUM:NM_172070;RSN_HUM:XM_005246299,RSN_HUM:XM_005246300	0.998931	0.0021521	0.894395	0.0005691	0.0021521	0.104536
AP1M1	8907	1	CASSETTE	RSN_HUM:NM_032493;RSN_HUM:NM_001130524	0.978716	0.00565688	0.874376	0.001764	0.00565688	0.10434
PI4KB	5298	4	CASSETTE	RSN_HUM:NM_002651,RSN_HUM:XM_005245264,RSN_HUM:XM_005245265;RSN_HUM:NM_001198773,RSN_HUM:XM_005245261	0.684298	0.00151995	0.788603	0.000729011	0.00151995	0.104305
AXL	558	1	CASSETTE	RSN_HUM:NM_001699;RSN_HUM:NM_021913,RSN_HUM:NM_001278599	0.390468	0.0293092	0.286233	0.0278849	0.0293092	0.104235
CD44	960	49	XCASSETTE	RSN_HUM:NM_001202556;RSN_HUM:XM_005253233	0.209007	0.00427546	0.104845	0.00920885	0.00920885	0.104162
ZC3H14	79882	4	CASSETTE	RSN_HUM:XM_005268068;RSN_HUM:NM_001160103,RSN_HUM:NM_001160104,RSN_HUM:NM_024824,RSN_HUM:XM_005268067	0.131475	0.00201026	0.0274102	0.00112002	0.00201026	0.104065
NFYC	4802	2	CASSETTE	RSN_HUM:NM_001142587,RSN_HUM:NM_001142589,RSN_HUM:NM_014223,RSN_HUM:NM_001142590;RSN_HUM:NM_001142588	0.952093	0.00163315	0.848123	0.00203883	0.00203883	0.10397
CMC2	56942	1	CASSETTE	RSN_HUM:NM_020188,RSN_HUM:XM_005256056;RSN_HUM:XM_005256057	0.669446	0.0042335	0.565547	0.00346585	0.0042335	0.103899
ZC3H14	79882	5	LCASSETTE	RSN_HUM:XM_005268069,RSN_HUM:XM_005268070,RSN_HUM:NM_207661,RSN_HUM:NM_207662;RSN_HUM:NM_001160103,RSN_HUM:NM_024824,RSN_HUM:XM_005268073	0.290084	0.00269896	0.393963	0.00166463	0.00269896	0.103879
FRS2	10818	11	CASSETTE	RSN_HUM:NM_001278353,RSN_HUM:NM_001278356,RSN_HUM:NM_006654;RSN_HUM:NM_001278355	0.976576	0.00132982	0.872764	0.0012968	0.00132982	0.103812
CD74	972	2	LCASSETTE	RSN_HUM:NM_001025158;RSN_HUM:NM_004355	0.165284	2.54108e-05	0.0614959	0.00118707	0.00118707	0.103788
ANXA11	311	5	LCASSETTE	RSN_HUM:NM_001157;RSN_HUM:NM_145869	0.794312	0.0126853	0.690585	0.00536922	0.0126853	0.103727
FAM13B	51306	3	CASSETTE	RSN_HUM:NM_001101800,RSN_HUM:NM_001101801;RSN_HUM:NM_016603	0.12687	0.0017845	0.0232221	0.002067	0.002067	0.103648
TTC3	7267	2	CASSETTE	RSN_HUM:NM_001001894,RSN_HUM:XM_005261047,RSN_HUM:XM_005261051,RSN_HUM:NM_003316;RSN_HUM:XM_005261055,RSN_HUM:XM_005261049,RSN_HUM:XM_005261052,RSN_HUM:XM_005261048,RSN_HUM:XM_005261053,RSN_HUM:XM_005261056,RSN_HUM:XM_005261045,RSN_HUM:XM_005261046,RSN_HUM:XM_005261054,RSN_HUM:XM_005261050	0.91049	0.00838472	0.806977	0.00852034	0.00852034	0.103513
DENND5A	23258	3	CASSETTE	RSN_HUM:NM_015213;RSN_HUM:XM_005252832	0.944838	0.00686162	0.841328	0.00510928	0.00686162	0.10351
PTCD2	79810	3	XCASSETTE	RSN_HUM:NM_001284403;RSN_HUM:NM_024754,RSN_HUM:XM_005248601	0.70097	0.00295719	0.597473	0.00175958	0.00295719	0.103497
MRPL39	54148	1	CASSETTE	RSN_HUM:NM_017446;RSN_HUM:NM_080794	1	0.0015328	0.896577	0.000345425	0.0015328	0.103423
PLK4	10733	2	INTERNAL5	RSN_HUM:NM_001190799,RSN_HUM:NM_014264,RSN_HUM:NM_001190801;RSN_HUM:XM_005262701	0.847324	0.0011829	0.950669	0.000697324	0.0011829	0.103345
PDLIM5	10611	12	LCASSETTE	RSN_HUM:NM_001256425;RSN_HUM:NM_001011515,RSN_HUM:NM_001256426,RSN_HUM:NM_001256427,RSN_HUM:XM_005262698	0.99088	0.00487092	0.887567	0.00681013	0.00681013	0.103313
HSD3B7	80270	2	CASSETTE	RSN_HUM:NM_001142777,RSN_HUM:NM_001142778;RSN_HUM:XM_005255601,RSN_HUM:NM_025193	0.0716491	0.00380047	0.174927	0.00280803	0.00380047	0.103278
UBAP1	51271	1	MUT_EXCLU	RSN_HUM:NM_001171201;RSN_HUM:NM_001171202	0.531101	0.00208095	0.634377	0.00193349	0.00208095	0.103276
TRERF1	55809	3	INTERNAL5	RSN_HUM:NM_033502;RSN_HUM:XM_005249223	0.787259	0.0011145	0.890524	0.000288257	0.0011145	0.103265
TBC1D7	51256	2	CASSETTE	RSN_HUM:NM_001143966,RSN_HUM:XM_005249166,RSN_HUM:XM_005249167;RSN_HUM:NM_001143964,RSN_HUM:NM_001143965,RSN_HUM:NM_001258457,RSN_HUM:NM_016495	0.218463	0.00118189	0.115313	0.000431	0.00118189	0.10315
IFT122	55764	2	CASSETTE	RSN_HUM:NM_001280545,RSN_HUM:NM_018262,RSN_HUM:NM_052989,RSN_HUM:XM_005247603,RSN_HUM:XM_005247604,RSN_HUM:XM_005247608,RSN_HUM:XM_005247609,RSN_HUM:XM_005247610;RSN_HUM:NM_001280541,RSN_HUM:NM_052985	0.976531	0.001048	0.87339	0.000381775	0.001048	0.103141
FOXJ3	22887	3	CASSETTE	RSN_HUM:NM_001198852;RSN_HUM:NM_001198850,RSN_HUM:NM_001198851,RSN_HUM:NM_014947	0.316736	0.00131245	0.213639	0.0028492	0.0028492	0.103097
CLPB	81570	1	CASSETTE	RSN_HUM:NM_001258393;RSN_HUM:NM_001258392,RSN_HUM:NM_030813	0.700952	0.00186996	0.804013	0.00161397	0.00186996	0.103061
KIAA1033	23325	4	INTERNAL3	RSN_HUM:NM_015275,RSN_HUM:XM_005268742,RSN_HUM:XM_005268745,RSN_HUM:XM_005268746;RSN_HUM:XM_005268743,RSN_HUM:XM_005268744	0.940506	0.0032121	0.837446	0.0010132	0.0032121	0.10306
SGCE	8910	6	LCASSETTE	RSN_HUM:XM_005250679;RSN_HUM:XM_005250675,RSN_HUM:XM_005250677	0.242997	0.00207863	0.139973	0.00231045	0.00231045	0.103024
RNF38	152006	28	CASSETTE	RSN_HUM:NM_194332;RSN_HUM:NM_194328	0.762917	0.000472791	0.660045	0.00121598	0.00121598	0.102872
FAM175A	84142	2	LCASSETTE	RSN_HUM:XM_005263281;RSN_HUM:NM_139076,RSN_HUM:XM_005263280	0.157941	0.00129732	0.0550918	0.00139948	0.00139948	0.102849
ARNT	405	2	INTERNAL3	RSN_HUM:NM_001197325,RSN_HUM:NM_001286036,RSN_HUM:NM_001668,RSN_HUM:NM_178427,RSN_HUM:XM_005245151,RSN_HUM:XM_005245154,RSN_HUM:XM_005245157;RSN_HUM:NM_001286035,RSN_HUM:XM_005245153	0.950252	0.00261922	0.847682	0.00292153	0.00292153	0.10257
NT5C2	22978	1	CASSETTE	RSN_HUM:NM_001134373;RSN_HUM:NM_012229	0.453119	0.00101663	0.350568	0.000793774	0.00101663	0.102551
NT5C2	22978	30	CASSETTE	RSN_HUM:XM_005269641,RSN_HUM:XM_005269643,RSN_HUM:XM_005269645,RSN_HUM:XM_005269646;RSN_HUM:XM_005269640,RSN_HUM:XM_005269644	0.453119	0.00101663	0.350568	0.000793774	0.00101663	0.102551
GORASP1	64689	2	INTERNAL5	RSN_HUM:NM_001278789,RSN_HUM:NM_031899;RSN_HUM:NR_103866	0.943798	0.00137718	0.841263	0.00024506	0.00137718	0.102535
PARL	55486	3	CASSETTE	RSN_HUM:XM_005247583,RSN_HUM:XM_005247584;RSN_HUM:XM_005247586,RSN_HUM:XM_005247585,RSN_HUM:XM_005247582,RSN_HUM:NM_001037639,RSN_HUM:NM_018622,RSN_HUM:XM_005247587	0.131854	0.002907	0.0294196	0.00255952	0.002907	0.102434
SRRM1	10250	2	INTERNAL3	RSN_HUM:NM_005839,RSN_HUM:XM_005245717,RSN_HUM:XM_005245719,RSN_HUM:XM_005245721,RSN_HUM:XM_005245722;RSN_HUM:XM_005245718,RSN_HUM:XM_005245720	0.783038	0.00234418	0.680628	0.0013561	0.00234418	0.10241
USP7	7874	1	CASSETTE	RSN_HUM:NM_001286457,RSN_HUM:NM_003470;RSN_HUM:NM_001286458	0.962392	0.002659	0.85999	0.00276945	0.00276945	0.102402
CYP20A1	57404	3	CASSETTE	RSN_HUM:XM_005246700,RSN_HUM:XM_005246698;RSN_HUM:NM_177538	0.335636	0.000961606	0.233258	0.00276089	0.00276089	0.102378
MELK	9833	11	MUT_M_EXCLU	RSN_HUM:NM_001256688;RSN_HUM:NM_001256690	0.35369	0.00172183	0.456026	0.000554001	0.00172183	0.102336
SLMAP	7871	23	LCASSETTE	RSN_HUM:XM_005265470,RSN_HUM:XM_005265471;RSN_HUM:XM_005265462,RSN_HUM:XM_005265463,RSN_HUM:XM_005265464	0.779342	0.00253611	0.67705	0.000779706	0.00253611	0.102292
CD44	960	58	XCASSETTE	RSN_HUM:XM_005253239,RSN_HUM:XM_005253240;RSN_HUM:XM_005253232	0.168451	0.000166221	0.0662058	0.00278299	0.00278299	0.102245
TPM3	7170	3	CASSETTE	RSN_HUM:NM_001043351,RSN_HUM:NM_001278188,RSN_HUM:NM_001278190,RSN_HUM:NM_001278191,RSN_HUM:NM_153649;RSN_HUM:NM_001278189	0.990164	0.0260659	0.888038	0.0158831	0.0260659	0.102126
FHL3	2275	1	CASSETTE	RSN_HUM:NM_001243878;RSN_HUM:NM_004468	0.0604899	0.00213093	0.162507	0.000361831	0.00213093	0.102017
ARHGAP27	201176	3	CASSETTE	RSN_HUM:XM_005257128;RSN_HUM:NM_199282,RSN_HUM:NM_001282290,RSN_HUM:XM_005257127	0.445754	8.0762e-05	0.343763	0.00213548	0.00213548	0.101991
CNBP	7555	2	INTERNAL5	RSN_HUM:NM_001127192,RSN_HUM:NM_001127193,RSN_HUM:NM_003418;RSN_HUM:NM_001127194,RSN_HUM:NM_001127195,RSN_HUM:NM_001127196	0.509717	0.0122776	0.407756	0.024842	0.024842	0.101961
NIPA2	81614	8	LCASSETTE	RSN_HUM:NM_001008892,RSN_HUM:NM_001008894;RSN_HUM:NM_030922	0.792769	0.00540573	0.690849	0.00567259	0.00567259	0.10192
TMEM184B	25829	19	INTERNAL5	RSN_HUM:NM_001195072,RSN_HUM:XM_005261513;RSN_HUM:XM_005261514	0.691989	7.24e-05	0.793903	0.0034741	0.0034741	0.101914
BCL2L13	23786	44	LCASSETTE	RSN_HUM:NM_001270735;RSN_HUM:NR_073069	0.711014	0.000750759	0.812765	0.00159419	0.00159419	0.101751
RBM33	155435	3	CASSETTE	RSN_HUM:XM_005249534,RSN_HUM:XM_005249535,RSN_HUM:NM_053043;RSN_HUM:XM_005249531,RSN_HUM:XM_005249532,RSN_HUM:XM_005249533	0.940951	0.00130315	0.839201	0.0013775	0.0013775	0.10175
PDS5B	23047	1	INTERNAL3	RSN_HUM:NM_015032,RSN_HUM:XM_005266296;RSN_HUM:XM_005266298,RSN_HUM:XM_005266295	0.812292	0.0013798	0.914023	0.0006746	0.0013798	0.101731
NFU1	27247	2	CASSETTE	RSN_HUM:NM_001002756,RSN_HUM:NR_045631,RSN_HUM:NR_045632;RSN_HUM:NM_001002755,RSN_HUM:NM_015700	0.14771	0.00364452	0.24944	0.00152181	0.00364452	0.10173
BCL2L13	23786	19	LCASSETTE	RSN_HUM:NM_001270728;RSN_HUM:NM_001270729	0.296032	0.00190959	0.397721	0.00325505	0.00325505	0.101689
CDC25B	994	4	CASSETTE	RSN_HUM:NM_001287522,RSN_HUM:NM_021872,RSN_HUM:NM_001287524;RSN_HUM:NM_001287516,RSN_HUM:NM_001287517,RSN_HUM:NM_001287518,RSN_HUM:NM_001287519,RSN_HUM:NM_001287520,RSN_HUM:NM_004358,RSN_HUM:NM_021873	0.075715	0.00623126	0.177343	0.000743758	0.00623126	0.101628
H2AFY	9555	4	MUT_EXCLU	RSN_HUM:NM_138609;RSN_HUM:NM_138610	0.664065	0.00866147	0.765649	0.00572496	0.00866147	0.101584
PHKG2	5261	2	INTERNAL5	RSN_HUM:XM_005255363,RSN_HUM:NM_000294,RSN_HUM:NM_001172432;RSN_HUM:XM_005255364	0.878588	0.0008187	0.777091	0.0013907	0.0013907	0.101497
SENP2	59343	2	INTERNAL3	RSN_HUM:XM_005247690,RSN_HUM:NM_021627;RSN_HUM:XM_005247691	0.88127	0.0015649	0.780009	0.0018428	0.0018428	0.101261
BCL2L13	23786	39	CASSETTE	RSN_HUM:NM_001270735;RSN_HUM:NM_001270732	0.290518	0.00183741	0.391744	0.00330752	0.00330752	0.101226
CRNDE	643911	3	INTERNAL3	RSN_HUM:NR_034105,RSN_HUM:NR_034106,RSN_HUM:NR_110453;RSN_HUM:NR_110454	0.692144	0.0030615	0.59117	0.00335983	0.00335983	0.100974
SLC25A30	253512	3	CASSETTE	RSN_HUM:NM_001010875;RSN_HUM:NM_001286807	0.971838	0.000498161	0.870944	0.00169689	0.00169689	0.100894
RHOT1	55288	11	LCASSETTE	RSN_HUM:NM_001033567,RSN_HUM:NM_001288755,RSN_HUM:NM_018307;RSN_HUM:NR_110083	0.839612	0.00109705	0.73872	0.0002327	0.00109705	0.100892
PVR	5817	5	CASSETTE	RSN_HUM:NM_001135769;RSN_HUM:NM_006505	0.22221	0.00298996	0.323101	0.0023912	0.00298996	0.100891
DLG1	1739	14	INTERNAL3	RSN_HUM:NM_001204386;RSN_HUM:NM_004087,RSN_HUM:XM_005269289,RSN_HUM:XM_005269290,RSN_HUM:XM_005269291,RSN_HUM:XM_005269292,RSN_HUM:XM_005269297	0.334708	0.00312302	0.435503	0.000510214	0.00312302	0.100795
CD44	960	50	XCASSETTE	RSN_HUM:NM_001202556;RSN_HUM:XM_005253234	0.21029	0.00424937	0.109513	0.0088163	0.0088163	0.100777
FAM96A	84191	2	CASSETTE	RSN_HUM:NM_001014812,RSN_HUM:NM_032231,RSN_HUM:NM_001289108;RSN_HUM:NR_110310	0.997422	0.00362652	0.896669	0.00141052	0.00362652	0.100753
NR4A1	3164	15	CASSETTE	RSN_HUM:NM_173157;RSN_HUM:NM_002135	0.941815	0.000430445	0.841153	0.00103287	0.00103287	0.100662
SPTAN1	6709	2	CASSETTE	RSN_HUM:NM_001195532,RSN_HUM:NM_003127;RSN_HUM:NM_001130438	0.979683	0.0082494	0.879164	0.004257	0.0082494	0.100519
ZNF207	7756	2	CASSETTE	RSN_HUM:NM_003457,RSN_HUM:XM_005258029;RSN_HUM:NM_001032293,RSN_HUM:NM_001098507,RSN_HUM:XM_005258028,RSN_HUM:XM_005258030	0.117487	0.00870136	0.0170032	0.000588124	0.00870136	0.100484
RPS6KC1	26750	1	CASSETTE	RSN_HUM:NM_001136138;RSN_HUM:NM_001287218,RSN_HUM:NM_001287220,RSN_HUM:NM_012424	0.495175	0.0018343	0.595541	0.000543204	0.0018343	0.100366
C1orf86	199990	3	XCASSETTE	RSN_HUM:NM_001146310,RSN_HUM:NM_001256945,RSN_HUM:NM_001282673;RSN_HUM:NM_001282671	0.689644	0.000832893	0.589418	0.00107993	0.00107993	0.100226
LRRC28	123355	2	CASSETTE	RSN_HUM:XM_005254861;RSN_HUM:NM_001284400,RSN_HUM:NM_144598	0.0988372	0.00100165	0.198933	0.00061478	0.00100165	0.100096
SH3BP2	6452	5	CASSETTE	RSN_HUM:XM_005248000;RSN_HUM:NM_001122681,RSN_HUM:XM_005247999,RSN_HUM:XM_005247998,RSN_HUM:XM_005247997,RSN_HUM:NM_001145855,RSN_HUM:NM_001145856,RSN_HUM:NM_003023	0.0937109	0.00103403	0.193657	0.000430143	0.00103403	0.0999461
NETO2	81831	1	INTERNAL5	RSN_HUM:NM_001201477;RSN_HUM:NM_018092	0.126009	0.00103088	0.225912	0.00179495	0.00179495	0.099903
DYRK2	8445	1	CASSETTE	RSN_HUM:NM_003583;RSN_HUM:NM_006482	0.351826	0.00124522	0.251949	0.00235326	0.00235326	0.099877
CD44	960	51	XCASSETTE	RSN_HUM:NM_001202556;RSN_HUM:XM_005253235	0.200591	0.00445485	0.100736	0.00958444	0.00958444	0.099855
CD44	960	61	XCASSETTE	RSN_HUM:XM_005253239,RSN_HUM:XM_005253240;RSN_HUM:XM_005253234	0.174804	0.00016018	0.0750365	0.00245547	0.00245547	0.0997675
ATG12	9140	8	MUT_EXCLU	RSN_HUM:NR_033362;RSN_HUM:NR_033363	0.344122	0.00020984	0.443841	0.00120893	0.00120893	0.099719
YTHDF3	253943	11	MUT_EXCLU	RSN_HUM:NM_001277816;RSN_HUM:NR_102434	0.806993	0.00440537	0.906695	0.00688259	0.00688259	0.099702
ZFAND5	7763	6	INTERNAL3	RSN_HUM:NM_001102421;RSN_HUM:NM_006007	0.811288	0.002321	0.711594	0.0016664	0.002321	0.099694
SZRD1	26099	6	CASSETTE	RSN_HUM:NR_073503;RSN_HUM:NM_001271869	0.706977	0.00545605	0.60729	0.0059973	0.0059973	0.099687
GRB10	2887	2	CASSETTE	RSN_HUM:NM_001001549;RSN_HUM:NM_001001550,RSN_HUM:NM_001001555,RSN_HUM:NM_005311	0.059279	0.00230436	0.158945	0.00318412	0.00318412	0.099666
PAPOLA	10914	3	LCASSETTE	RSN_HUM:XM_005267282;RSN_HUM:NM_032632,RSN_HUM:XM_005267280	0.159446	0.00824416	0.0599447	0.00831099	0.00831099	0.0995013
FBXO25	26260	7	MUT_EXCLU	RSN_HUM:NM_012173,RSN_HUM:XM_005266033;RSN_HUM:XM_005266032	0.534162	0.00259248	0.434682	0.00215349	0.00259248	0.09948
CD44	960	15	XCASSETTE	RSN_HUM:NM_001202556;RSN_HUM:NM_001001389	0.200264	0.0044621	0.100793	0.00957899	0.00957899	0.099471
MEG3	55384	19	MUT_M_EXCLU	RSN_HUM:NR_003530;RSN_HUM:NR_046469	0.225148	0.00228362	0.324617	0.00262012	0.00262012	0.099469
SLC24A1	9187	1	CASSETTE	RSN_HUM:XM_005254779,RSN_HUM:XM_005254780;RSN_HUM:XM_005254778,RSN_HUM:XM_005254781,RSN_HUM:NM_004727	0.8778	0.00119708	0.778404	0.000517083	0.00119708	0.099396
MEF2A	4205	7	MUT_EXCLU	RSN_HUM:NM_001130926,RSN_HUM:NM_001171894,RSN_HUM:XM_005254915;RSN_HUM:XM_005254914,RSN_HUM:XM_005254916	0.834695	0.00132228	0.735417	0.00323789	0.00323789	0.099278
TGFBR1	7046	3	INTERNAL3	RSN_HUM:NM_004612;RSN_HUM:XM_005252150	0.872392	0.0027796	0.971567	0.0038055	0.0038055	0.099175
PTPRS	5802	2	CASSETTE	RSN_HUM:XM_005259606,RSN_HUM:XM_005259607,RSN_HUM:XM_005259609,RSN_HUM:XM_005259610,RSN_HUM:NM_130853,RSN_HUM:NM_130854,RSN_HUM:NM_130855;RSN_HUM:XM_005259600,RSN_HUM:XM_005259601,RSN_HUM:NM_002850	0.841662	0.00260743	0.742525	0.0022477	0.00260743	0.099137
TRAPPC13	80006	2	INTERNAL3	RSN_HUM:NM_001093755,RSN_HUM:NM_001243737;RSN_HUM:NM_001093756,RSN_HUM:NM_024941	0.482515	0.001018	0.383443	0.0002887	0.001018	0.099072
UBE2V1	7335	80	CASSETTE	RSN_HUM:NR_047554;RSN_HUM:NM_001282578	0.280435	0.00288409	0.379422	0.00162141	0.00288409	0.098987
ATP5SL	55101	3	CASSETTE	RSN_HUM:NM_001167870,RSN_HUM:NM_001167871;RSN_HUM:NM_001167867,RSN_HUM:NM_001167868,RSN_HUM:NM_001167869,RSN_HUM:NM_018035	0.177742	0.00308125	0.0787786	0.0010904	0.00308125	0.0989634
SIKE1	80143	5	CASSETTE	RSN_HUM:NR_049742;RSN_HUM:NM_025073	0.177854	0.00191337	0.0789147	0.0033796	0.0033796	0.0989393
RASSF1	11186	1	CASSETTE	RSN_HUM:NM_001206957;RSN_HUM:NM_007182	0.466455	0.00187263	0.565301	0.000985316	0.00187263	0.098846
CSF1	1435	2	INTERNAL3	RSN_HUM:NM_000757,RSN_HUM:NM_172212;RSN_HUM:NM_172211	0.9274	0.0034642	0.828559	0.0025869	0.0034642	0.098841
MEG3	55384	24	MUT_M_EXCLU	RSN_HUM:NR_033358,RSN_HUM:NR_046468;RSN_HUM:NR_033359	0.361795	0.00211424	0.460623	0.00289586	0.00289586	0.098828
SNX15	29907	1	CASSETTE	RSN_HUM:NM_147777;RSN_HUM:NM_013306	0.0814353	0.00222631	0.180251	0.00246378	0.00246378	0.0988157
TRIQK	286144	3	MUT_EXCLU	RSN_HUM:NM_001171795;RSN_HUM:NM_001171798	0.864743	0.00108549	0.765967	0.000382371	0.00108549	0.098776
FBXL4	26235	2	CASSETTE	RSN_HUM:NR_103836,RSN_HUM:NR_103837;RSN_HUM:NM_001278716,RSN_HUM:NM_012160,RSN_HUM:XM_005266930	0.149873	0.00115831	0.0513625	0.00102604	0.00115831	0.0985105
MARK3	4140	10	CASSETTE	RSN_HUM:NM_001128920,RSN_HUM:NM_002376;RSN_HUM:NM_001128921,RSN_HUM:XM_005267641	0.168541	0.00203037	0.0700376	0.00219168	0.00219168	0.0985034
PDK1	5163	2	CASSETTE	RSN_HUM:NR_103731,RSN_HUM:NM_002610,RSN_HUM:NR_103729;RSN_HUM:NM_001278549	0.93031	0.00157053	0.831952	0.000598415	0.00157053	0.098358
HNRNPA1	3178	2	CASSETTE	RSN_HUM:NM_002136;RSN_HUM:XM_005268826,RSN_HUM:NM_031157	0.845606	0.0648018	0.747274	0.0640462	0.0648018	0.098332
PODXL	5420	1	CASSETTE	RSN_HUM:NM_005397;RSN_HUM:NM_001018111	0.766406	0.00684755	0.864654	0.00782477	0.00782477	0.098248
SMARCC2	6601	3	CASSETTE	RSN_HUM:NM_139067;RSN_HUM:NM_001130420	0.784058	0.00191363	0.882306	0.00081355	0.00191363	0.098248
ZNF92	168374	9	LCASSETTE	RSN_HUM:NM_001287534;RSN_HUM:NM_152626	0.922961	0.00156832	0.824735	0.00258483	0.00258483	0.098226
NSMF	26012	7	CASSETTE	RSN_HUM:NM_001130971,RSN_HUM:XM_005266062;RSN_HUM:NM_015537,RSN_HUM:XM_005266061	0.273051	0.00150174	0.174833	0.0020837	0.0020837	0.098218
PTGES3	10728	7	CASSETTE	RSN_HUM:NM_001282601;RSN_HUM:NR_104219	0.183709	0.00344348	0.0855023	0.00176954	0.00344348	0.0982067
BCL2L1	598	3	INTERNAL5	RSN_HUM:NM_001191;RSN_HUM:NM_138578	0.0524728	0.00579538	0.150652	0.00537132	0.00579538	0.0981792
ARMC1	55156	3	CASSETTE	RSN_HUM:XM_005251264;RSN_HUM:NM_018120	0.0271854	0.00270734	0.125298	0.00447572	0.00447572	0.0981126
CTNND1	1500	18	CASSETTE	RSN_HUM:NM_001085463,RSN_HUM:NM_001085464,RSN_HUM:NM_001085465,RSN_HUM:NM_001085466,RSN_HUM:NM_001085468;RSN_HUM:NM_001206883,RSN_HUM:NM_001206884,RSN_HUM:NM_001206886,RSN_HUM:NM_001206887,RSN_HUM:NM_001206888	0.418664	0.00298115	0.320554	0.000262358	0.00298115	0.09811
IVD	3712	1	CASSETTE	RSN_HUM:NM_001159508;RSN_HUM:NM_002225	0.801614	0.0131063	0.703524	0.00427278	0.0131063	0.09809
MED24	9862	1	INTERNAL3	RSN_HUM:NM_001079518;RSN_HUM:NM_001267797,RSN_HUM:NM_014815,RSN_HUM:NR_052017	0.623194	0.00111426	0.525134	0.000663513	0.00111426	0.09806
RAB34	83871	4	INTERNAL3	RSN_HUM:NM_001142625,RSN_HUM:NM_001142624,RSN_HUM:NM_001144943;RSN_HUM:NM_001256276,RSN_HUM:NM_001256277	0.281991	0.00440015	0.379975	0.00164187	0.00440015	0.097984
CTNND1	1500	11	CASSETTE	RSN_HUM:NM_001085463,RSN_HUM:NM_001085464,RSN_HUM:NM_001085465,RSN_HUM:NM_001085466,RSN_HUM:NM_001085468;RSN_HUM:NM_001085462	0.357327	0.00349288	0.259368	0.00032425	0.00349288	0.097959
USP19	10869	2	INTERNAL5	RSN_HUM:NM_001199161,RSN_HUM:XM_005264829,RSN_HUM:NM_001199160,RSN_HUM:XM_005264823,RSN_HUM:XM_005264824,RSN_HUM:XM_005264825,RSN_HUM:XM_005264826;RSN_HUM:NM_001199162	0.983369	0.0010643	0.885425	0.000489636	0.0010643	0.097944
PIP5K1C	23396	1	CASSETTE	RSN_HUM:NM_001195733;RSN_HUM:NM_012398	0.877977	0.0031412	0.780144	0.0039767	0.0039767	0.097833
LRRC75A-AS1	125144	57	MUT_EXCLU	RSN_HUM:NR_027176,RSN_HUM:NR_027178;RSN_HUM:NR_027177	0.496769	0.000214642	0.399057	0.0071399	0.0071399	0.097712
MIB2	142678	4	INTERNAL5	RSN_HUM:NM_001170686,RSN_HUM:NM_001170688,RSN_HUM:NM_080875;RSN_HUM:NR_033183	0.783122	0.00111768	0.685553	0.0013608	0.0013608	0.097569
UFSP2	55325	1	INTERNAL5	RSN_HUM:NM_018359;RSN_HUM:NR_028085	0.995308	0.001982	0.897794	0.0015909	0.001982	0.097514
GSN	2934	16	MUT_EXCLU	RSN_HUM:NM_001127663;RSN_HUM:NM_001127667	0.215178	0.00111207	0.312565	0.00102544	0.00111207	0.097387
CIC	23152	3	INTERNAL3	RSN_HUM:XM_005258674;RSN_HUM:NM_015125	0.383221	0.00179627	0.285956	0.0017125	0.00179627	0.097265
PRMT7	54496	9	CASSETTE	RSN_HUM:XM_005255992,RSN_HUM:XM_005255993;RSN_HUM:NM_019023,RSN_HUM:XM_005255988,RSN_HUM:XM_005255991,RSN_HUM:XM_005255989,RSN_HUM:NM_001290018	0.377081	0.00153716	0.280018	0.00084923	0.00153716	0.097063
BAG6	7917	3	CASSETTE	RSN_HUM:NM_001199697;RSN_HUM:NM_001098534,RSN_HUM:NM_001199698,RSN_HUM:NM_004639,RSN_HUM:NM_080702,RSN_HUM:NM_080703,RSN_HUM:XM_005249393,RSN_HUM:XM_005249396	0.0200037	0.00822644	0.117058	0.0111065	0.0111065	0.0970543
CD59	966	5	LCASSETTE	RSN_HUM:NM_000611;RSN_HUM:NM_203330	0.827833	0.0248294	0.730859	0.0360972	0.0360972	0.096974
TIMM23	100287932	1	CASSETTE	RSN_HUM:NM_006327,RSN_HUM:NR_073030;RSN_HUM:NR_073029	0.990732	0.00609089	0.893778	0.0033976	0.00609089	0.096954
[truncated: 7,780 more rows]

## Sheet: Sheet1
Supplementary Data 2. Numbers of junctions represented in Intropolis and RefSeq/Ensembl GTF exon annotation
	Intropolis Database	RefSeq/Ensembl GTF
begin and end coordinates present	399 (55.4%)	3 (0.4%)
only begin coordinate present	138 (19.2%)	62 (8.6%)
only end coordinate present	145 (20.1%)	74 (10.3%)
begin and end coordinate not present	38 (5.3%)	581 (80.7%)
Sum	720	720
